# Supplementary material for: Bayesian Top-Down Protein Sequence Alignment with Inferred Position-Specific Gap Penalties
Source: PLoS Comput Biol. 2016 May 18;12(5):e1004936. doi: 10.1371/journal.pcbi.1004936 (PMC4871425; doi:10.1371/journal.pcbi.1004936)
Supplement: S1 Statistics — (XLSX) [file pcbi.1004936.s001.xlsx]

## Sheet: wilcoxon
cdd_id	ave_len	nres	num_sq	cols	RE	gsm_cols	GISMO	mft_cols	MAFFT	CLO_cols	CLUSTAL	mus_cols	MUSCLE	da_cols	Dialign	kal_cols	Kalign		vsMFT	vsCLO	vsMUS	vs DA	vs KA		vsMFT	SIGN	ABS	rank	SR		vsCLO	SIGN	ABS	SR		vsMUS	SIGN	ABS	SR		vs DA	SIGN	ABS	SR		vs KA	SIGN	ABS	SR
cd00003	250.547	13279	53	234	1.51	237	0.98088	525	0.98363	515	0.97725	515	0.97447	530	0.97117	558	0.97788		-0.00275	0.00363	0.00641	0.00971	0.003		-6e-05	-1	6e-05	1	-1		0.00011	1	0.00011	1		-4e-05	-1	4e-05	-1		1e-05	1	1e-05	1		0.00012	1	0.00012	1
cd00009	655.694	87863	134	150	0.62	139	0.33619	8625	0.2428	6430	0.29931	4996	0.19782	12913	0.23971	6300	0.28889		0.09339	0.03688	0.13837	0.09648	0.0473		-0.00013	-1	0.00013	2	-2		0.00029	1	0.00029	2		-0.00028	-1	0.00028	-2		0.00035	1	0.00035	2		-0.0007	-1	0.0007	-2
cd00010	188.343	12619	67	63	1.03	84	0.79693	1191	0.82483	1230	0.84296	1102	0.81433	1655	0.72608	1205	0.75131		-0.0279	-0.04603	-0.0174	0.07085	0.04562		0.00025	1	0.00025	3	3		0.00068	1	0.00068	3		0.00037	1	0.00037	3		-0.00046	-1	0.00046	-3		-0.00095	-1	0.00095	-3
cd00012	430.08	53760	125	303	0.44	115	0.15256	2958	0.17134	2354	0.22647	1565	0.16236	5938	0.13039	2425	0.16359		-0.01878	-0.07391	-0.0098	0.02217	-0.01103		0.00097	1	0.00097	4	4		-0.00112	-1	0.00112	-4		-0.00052	-1	0.00052	-4		-0.00087	-1	0.00087	-4		-0.00123	-1	0.00123	-4
cd00014	920.37	49700	54	107	0.9	104	0.388	7299	0.31787	7986	0.29	5810	0.25111	14244	0.31603	6640	0.31449		0.07013	0.098	0.13689	0.07197	0.07351		-0.00112	-1	0.00112	5	-5		0.00126	1	0.00126	5		-0.00058	-1	0.00058	-5		-0.00107	-1	0.00107	-5		0.00134	1	0.00134	5
cd00015	681.183	40871	60	185	1.07	549	0.25741	1483	0.2715	1477	0.27181	1450	0.27533	1672	0.25969	1494	0.26931		-0.01409	-0.0144	-0.01792	-0.00228	-0.0119		-0.00155	-1	0.00155	6	-6		0.0013	1	0.0013	6		0.00091	1	0.00091	6		0.0015	1	0.0015	6		-0.00146	-1	0.00146	-6
cd00020	797.833	62231	78	120	0.72	317	0.09389	4571	0.08398	4803	0.09259	3862	0.07816	10114	0.05464	3851	0.0887		0.00991	0.0013	0.01573	0.03925	0.00519		-0.00169	-1	0.00169	7	-7		-0.00149	-1	0.00149	-7		0.00112	1	0.00112	7		-0.00151	-1	0.00151	-7		-0.00159	-1	0.00159	-7
cd00021	551.5	30884	56	39	1.24	186	0.70555	2774	0.67632	2467	0.64135	1919	0.66504	5251	0.62384	2594	0.56777		0.02923	0.0642	0.04051	0.08171	0.13778		0.00182	1	0.00182	8	8		0.00168	1	0.00168	8		-0.00119	-1	0.00119	-8		-0.00214	-1	0.00214	-8		0.00178	1	0.00178	8
cd00022	475.892	30933	65	69	1.3	96	0.33547	5056	0.39716	5466	0.38655	4864	0.40283	6260	0.31314	5181	0.3893		-0.06169	-0.05108	-0.06736	0.02233	-0.05383		0.00186	1	0.00186	9	9		0.00181	1	0.00181	9		-0.00148	-1	0.00148	-9		-0.0022	-1	0.0022	-9		0.00179	1	0.00179	9
cd00024	1052.53	128409	122	55	0.91	93	0.48028	8000	0.24647	7652	0.29182	5786	0.23276	17328	0.30137	7618	0.24513		0.23381	0.18846	0.24752	0.17891	0.23515		-0.00197	-1	0.00197	10	-10		-0.0019	-1	0.0019	-10		-0.00174	-1	0.00174	-10		-0.00228	-1	0.00228	-10		-0.00192	-1	0.00192	-10
cd00027	861.048	124852	145	72	0.66	77	0.3131	5717	0.04256	4961	0.07946	2797	0.03631	16559	0.16398	4294	0.07683		0.27054	0.23364	0.27679	0.14912	0.23627		-0.00198	-1	0.00198	11	-11		0.0019	1	0.0019	11		0.00197	1	0.00197	11		0.00245	1	0.00245	11		-0.00205	-1	0.00205	-11
cd00029	912.74	45637	50	50	1.18	58	0.666	4632	0.31969	5192	0.40693	2487	0.23786	11198	0.26218	4305	0.25493		0.34631	0.25907	0.42814	0.40382	0.41107		-0.00206	-1	0.00206	12	-12		-0.00207	-1	0.00207	-12		-0.00218	-1	0.00218	-12		0.00248	1	0.00248	12		-0.00243	-1	0.00243	-12
cd00030	824.784	431362	523	102	0.66	111	0.50919	16712	0.09399	24540	0.07275	6978	0.2032	71861	0.10654	27976	0.11058		0.4152	0.43644	0.30599	0.40265	0.39861		0.00224	1	0.00224	13	13		-0.00208	-1	0.00208	-13		0.00242	1	0.00242	13		0.00273	1	0.00273	13		0.00255	1	0.00255	13
cd00032	389.094	20622	53	244	1.27	234	0.83717	1088	0.91639	1131	0.91973	972	0.9042	1514	0.86387	1287	0.85106		-0.07922	-0.08256	-0.06703	-0.0267	-0.01389		0.00249	1	0.00249	14	14		-0.00241	-1	0.00241	-14		0.00243	1	0.00243	14		0.00293	1	0.00293	14		-0.00273	-1	0.00273	-14
cd00033	812.219	233919	288	57	0.85	153	0.09796	7506	0.07246	6665	0.03631	4466	0.07521	17395	0.03691	4810	0.07033		0.0255	0.06165	0.02275	0.06105	0.02763		0.00257	1	0.00257	15	15		-0.00243	-1	0.00243	-15		-0.00265	-1	0.00265	-15		0.00321	1	0.00321	15		0.00286	1	0.00286	15
cd00037	924.444	788551	853	115	0.7	115	0.36922	39651	0.15097	58463	0.10398	0	0.001	97222	0.14986	33898	0.23293		0.21825	0.26524	0.36822	0.21936	0.13629		-0.00275	-1	0.00275	16	-16		0.00254	1	0.00254	16		0.00281	1	0.00281	16		0.00331	1	0.00331	16		0.00294	1	0.00294	16
cd00038	524.799	153766	293	115	0.65	118	0.55263	7599	0.46151	6067	0.55876	3790	0.45551	13806	0.4977	6002	0.4517		0.09112	-0.00613	0.09712	0.05493	0.10093		0.00278	1	0.00278	17	17		0.00261	1	0.00261	17		-0.00282	-1	0.00282	-17		0.00338	1	0.00338	17		0.003	1	0.003	17
cd00041	1773.26	523113	295	112	0.85	138	0.11681	11560	0.11694	8347	0.08204	6657	0.09303	26561	0.06277	7635	0.08874		-0.00013	0.03477	0.02378	0.05404	0.02807		0.00335	1	0.00335	18	18		-0.0028	-1	0.0028	-18		-0.00285	-1	0.00285	-18		-0.00351	-1	0.00351	-18		0.00301	1	0.00301	18
cd00042	208.113	11030	53	101	1.01	82	0.47985	1139	0.56801	955	0.42222	901	0.47267	1505	0.4937	907	0.41613		-0.08816	0.05763	0.00718	-0.01385	0.06372		0.00352	1	0.00352	19	19		-0.00293	-1	0.00293	-19		-0.00288	-1	0.00288	-19		0.00374	1	0.00374	19		0.00319	1	0.00319	19
cd00043	409.523	134733	329	89	0.69	156	0.32017	5966	0.35274	3721	0.36341	2691	0.36431	9214	0.30454	4382	0.36484		-0.03257	-0.04324	-0.04414	0.01563	-0.04467		0.00387	1	0.00387	20	20		0.00298	1	0.00298	20		-0.00292	-1	0.00292	-20		0.00394	1	0.00394	20		0.00324	1	0.00324	20
cd00046	979.428	224289	229	146	0.74	359	0.62495	9129	0.51006	7063	0.54993	4911	0.32611	25554	0.28301	8872	0.51096		0.11489	0.07502	0.29884	0.34194	0.11399		-0.00403	-1	0.00403	21	-21		0.00309	1	0.00309	21		-0.00297	-1	0.00297	-21		0.00458	1	0.00458	21		0.0033	1	0.0033	21
cd00047	907.069	92521	102	231	1.23	269	0.61698	6369	0.59886	5607	0.58898	4029	0.67136	15387	0.46606	5582	0.60042		0.01812	0.028	-0.05438	0.15092	0.01656		-0.0042	-1	0.0042	22	-22		-0.00311	-1	0.00311	-22		-0.003	-1	0.003	-22		0.00499	1	0.00499	22		-0.00366	-1	0.00366	-22
cd00048	571.574	88594	155	68	0.91	71	0.46566	6445	0.32569	4873	0.32515	2766	0.24816	13032	0.33606	6392	0.30607		0.13997	0.14051	0.2175	0.1296	0.15959		0.00447	1	0.00447	23	23		-0.00342	-1	0.00342	-23		0.00325	1	0.00325	23		-0.005	-1	0.005	-23		0.00377	1	0.00377	23
cd00051	282.8	29694	105	63	0.99	70	0.42333	3350	0.36377	3525	0.43099	3361	0.37426	5567	0.32534	3480	0.36038		0.05956	-0.00766	0.04907	0.09799	0.06295		0.00498	1	0.00498	24	24		-0.00347	-1	0.00347	-24		-0.0034	-1	0.0034	-24		0.00505	1	0.00505	24		-0.00385	-1	0.00385	-24
cd00052	844.172	48962	58	67	1.23	95	0.35971	3779	0.37333	3973	0.34147	2617	0.26409	7609	0.33644	3244	0.27515		-0.01362	0.01824	0.09562	0.02327	0.08456		-0.00513	-1	0.00513	25	-25		0.00361	1	0.00361	25		-0.0034	-1	0.0034	-25		0.0057	1	0.0057	25		-0.00395	-1	0.00395	-25
cd00053	1909.26	1647692	863	35	0.99	101	0.0302	20923	0.03132	35870	0.00931	16488	0.02404	76989	0.01168	21145	0.0198		-0.00112	0.02089	0.00616	0.01852	0.0104		-0.00565	-1	0.00565	26	-26		0.00363	1	0.00363	26		-0.00346	-1	0.00346	-26		-0.00585	-1	0.00585	-26		0.004	1	0.004	26
cd00054	1844.94	1038703	563	40	1.11	107	0.03155	22369	0.03324	26001	0.02059	23515	0.02715	69817	0.01252	20924	0.02688		-0.00169	0.01096	0.0044	0.01903	0.00467		0.00569	1	0.00569	27	27		-0.00372	-1	0.00372	-27		0.00395	1	0.00395	27		-0.00586	-1	0.00586	-27		-0.00401	-1	0.00401	-27
cd00055	2223.44	707055	318	50	1.09	271	0.02632	9822	0.05686	8439	0.05173	6697	0.05435	20003	0.04165	7953	0.0551		-0.03054	-0.02541	-0.02803	-0.01533	-0.02878		-0.00572	-1	0.00572	28	-28		-0.00395	-1	0.00395	-28		0.00408	1	0.00408	28		0.00594	1	0.00594	28		-0.00401	-1	0.00401	-28
cd00056	290.028	40894	141	154	0.86	172	0.67681	2182	0.70543	1858	0.69554	1765	0.70427	2842	0.6509	2444	0.69438		-0.02862	-0.01873	-0.02746	0.02591	-0.01757		-0.00576	-1	0.00576	29	-29		-0.00399	-1	0.00399	-29		-0.00417	-1	0.00417	-29		0.00638	1	0.00638	29		0.00421	1	0.00421	29
cd00060	712.789	101216	142	102	0.75	95	0.53268	6450	0.33265	6782	0.40571	3900	0.14971	20246	0.39467	5872	0.31901		0.20003	0.12697	0.38297	0.13801	0.21367		0.00585	1	0.00585	30	30		-0.00406	-1	0.00406	-30		0.00437	1	0.00437	30		0.00644	1	0.00644	30		-0.00449	-1	0.00449	-30
cd00063	5295.95	3929593	742	93	0.62	221	0.04318	39434	0.02925	38762	0.01492	0	0.001	91041	0.01627	36835	0.03216		0.01393	0.02826	0.04218	0.02691	0.01102		-0.0059	-1	0.0059	31	-31		0.00417	1	0.00417	31		0.0044	1	0.0044	31		-0.00646	-1	0.00646	-31		0.00451	1	0.00451	31
cd00064	1210.89	193742	160	49	0.92	221	0.04769	5135	0.06698	4053	0.0644	3348	0.06007	8537	0.04619	4786	0.06795		-0.01929	-0.01671	-0.01238	0.0015	-0.02026		0.00594	1	0.00594	32	32		-0.00421	-1	0.00421	-32		-0.00468	-1	0.00468	-32		0.00646	1	0.00646	32		-0.00452	-1	0.00452	-32
cd00065	816.788	320181	392	52	1.05	56	0.81328	14517	0.38215	31897	0.1451	6086	0.1344	62140	0.57934	20597	0.30403		0.43113	0.66818	0.67888	0.23394	0.50925		0.00621	1	0.00621	33	33		-0.00453	-1	0.00453	-33		-0.00484	-1	0.00484	-33		0.00649	1	0.00649	33		0.00463	1	0.00463	33
cd00067	714.563	85033	119	36	1.34	50	0.89579	4259	0.81168	4192	0.85848	2336	0.77002	16190	0.64636	3327	0.83012		0.08411	0.03731	0.12577	0.24943	0.06567		-0.00637	-1	0.00637	34	-34		-0.00454	-1	0.00454	-34		0.0049	1	0.0049	34		0.00654	1	0.00654	34		0.00463	1	0.00463	34
cd00069	147.736	21274	144	95	1.32	114	0.87609	1603	0.90696	1395	0.90957	1521	0.89285	1544	0.78657	1637	0.90903		-0.03087	-0.03348	-0.01676	0.08952	-0.03294		0.00639	1	0.00639	35	35		0.0047	1	0.0047	35		0.00493	1	0.00493	35		0.0066	1	0.0066	35		0.00467	1	0.00467	35
cd00070	297.707	27389	92	127	1.01	130	0.55097	1876	0.56813	1802	0.47918	1536	0.51377	2872	0.39767	1706	0.56458		-0.01716	0.07179	0.0372	0.1533	-0.01361		0.0068	1	0.0068	36	36		0.00475	1	0.00475	36		-0.00515	-1	0.00515	-36		-0.00667	-1	0.00667	-36		0.00468	1	0.00468	36
cd00073	229.789	16315	71	89	1.4	155	0.79085	715	0.82681	915	0.85856	741	0.7721	1391	0.77354	871	0.78302		-0.03596	-0.06771	0.01875	0.01731	0.00783		-0.00697	-1	0.00697	37	-37		-0.00517	-1	0.00517	-37		0.00522	1	0.00522	37		-0.00694	-1	0.00694	-37		-0.00478	-1	0.00478	-37
cd00075	646.349	312833	484	104	0.81	131	0.72834	11070	0.45293	6513	0.50907	4078	0.47461	26689	0.56384	9545	0.48402		0.27541	0.21927	0.25373	0.1645	0.24432		-0.0072	-1	0.0072	38	-38		-0.00546	-1	0.00546	-38		0.00528	1	0.00528	38		-0.00705	-1	0.00705	-38		-0.00514	-1	0.00514	-38
cd00077	450.613	111752	248	146	0.52	149	0.3978	3770	0.31521	2724	0.16524	1528	0.11554	9989	0.34239	3987	0.24056		0.08259	0.23256	0.28226	0.05541	0.15724		0.00764	1	0.00764	39	39		-0.00588	-1	0.00588	-39		-0.00531	-1	0.00531	-39		-0.00767	-1	0.00767	-39		0.00519	1	0.00519	39
cd00079	784.008	102705	131	131	0.83	343	0.69246	5753	0.6219	5072	0.61964	3099	0.55802	12848	0.54946	5997	0.40658		0.07056	0.07282	0.13444	0.143	0.28588		0.0077	1	0.0077	40	40		0.00596	1	0.00596	40		-0.00575	-1	0.00575	-40		0.00824	1	0.00824	40		0.00527	1	0.00527	40
cd00080	664.472	305657	460	71	0.9	259	0.51832	7991	0.62283	5428	0.59178	4163	0.55049	15314	0.46666	8051	0.57898		-0.10451	-0.07346	-0.03217	0.05166	-0.06066		0.00825	1	0.00825	41	41		0.00596	1	0.00596	41		0.00576	1	0.00576	41		0.00849	1	0.00849	41		-0.00564	-1	0.00564	-41
cd00081	898.449	70079	78	311	0.55	149	0.30703	5545	0.38366	4761	0.32409	2794	0.06429	11480	0.24663	4245	0.11976		-0.07663	-0.01706	0.24274	0.0604	0.18727		-0.00856	-1	0.00856	42	-42		0.00598	1	0.00598	42		-0.00612	-1	0.00612	-42		0.00897	1	0.00897	42		0.00565	1	0.00565	42
cd00082	641.8	297795	464	65	0.75	230	0.80212	11191	0.62575	7193	0.83051	5058	0.8043	30707	0.38699	10855	0.72766		0.17637	-0.02839	-0.00218	0.41513	0.07446		-0.00892	-1	0.00892	43	-43		-0.00613	-1	0.00613	-43		0.00616	1	0.00616	43		-0.00914	-1	0.00914	-43		0.00569	1	0.00569	43
cd00083	385.74	56318	146	60	0.91	63	0.78883	4121	0.65069	3754	0.80608	1918	0.4052	11700	0.55721	2957	0.62996		0.13814	-0.01725	0.38363	0.23162	0.15887		0.00896	1	0.00896	44	44		-0.0062	-1	0.0062	-44		-0.00629	-1	0.00629	-44		-0.00934	-1	0.00934	-44		0.0057	1	0.0057	44
cd00084	454.668	87751	193	66	0.96	87	0.6523	6298	0.49657	4901	0.5367	3211	0.36847	13828	0.61667	4425	0.4493		0.15573	0.1156	0.28383	0.03563	0.203		-0.00901	-1	0.00901	45	-45		-0.00622	-1	0.00622	-45		0.00641	1	0.00641	45		-0.00946	-1	0.00946	-45		-0.00594	-1	0.00594	-45
cd00085	312.869	38170	122	58	0.81	57	0.60908	2688	0.42581	2177	0.53982	1167	0.22571	6602	0.55637	1927	0.51193		0.18327	0.06926	0.38337	0.05271	0.09715		-0.00927	-1	0.00927	46	-46		0.00641	1	0.00641	46		0.00656	1	0.00656	46		-0.00949	-1	0.00949	-46		0.00617	1	0.00617	46
cd00086	487.836	155132	318	59	1.01	65	0.71727	7995	0.56448	6611	0.65759	4348	0.48838	23759	0.56384	6806	0.54485		0.15279	0.05968	0.22889	0.15343	0.17242		-0.00939	-1	0.00939	47	-47		0.00661	1	0.00661	47		-0.00676	-1	0.00676	-47		0.00971	1	0.00971	47		0.00634	1	0.00634	47
cd00087	563.983	32711	58	215	1.44	213	0.85959	4765	0.8812	4868	0.9289	4707	0.88902	6336	0.8349	4978	0.87495		-0.02161	-0.06931	-0.02943	0.02469	-0.01536		-0.00952	-1	0.00952	48	-48		0.00662	1	0.00662	48		-0.00693	-1	0.00693	-48		0.00992	1	0.00992	48		-0.00634	-1	0.00634	-48
cd00088	836.011	73569	88	97	0.8	233	0.00285	5064	0.29392	4332	0.27663	3474	0.29064	9476	0.5233	4758	0.3387		-0.29107	-0.27378	-0.28779	-0.52045	-0.33585		-0.00956	-1	0.00956	49	-49		-0.00682	-1	0.00682	-49		-0.007	-1	0.007	-49		-0.0104	-1	0.0104	-49		0.00642	1	0.00642	49
cd00090	198.078	35456	179	77	0.72	78	0.68565	2211	0.51143	1833	0.66314	1274	0.62951	3682	0.60131	1395	0.67853		0.17422	0.02251	0.05614	0.08434	0.00712		-0.00958	-1	0.00958	50	-50		0.00687	1	0.00687	50		-0.00714	-1	0.00714	-50		0.01088	1	0.01088	50		0.00655	1	0.00655	50
cd00093	202.231	112845	558	58	0.72	70	0.86551	4453	0.59261	2882	0.67478	2554	0.72968	8663	0.7718	2615	0.76056		0.2729	0.19073	0.13583	0.09371	0.10495		0.00985	1	0.00985	51	51		0.00698	1	0.00698	51		0.00718	1	0.00718	51		0.01104	1	0.01104	51		-0.0066	-1	0.0066	-51
cd00096	1614.13	2960322	1834	72	0.55	156	0.11359	93618	0.05647	71104	0.03079	0	0.001	0	0.001	60844	0.069		0.05712	0.0828	0.11259	0.11259	0.04459		0.00991	1	0.00991	52	52		-0.00702	-1	0.00702	-52		-0.00738	-1	0.00738	-52		0.01106	1	0.01106	52		-0.00665	-1	0.00665	-52
cd00101	143.159	18897	132	82	0.86	66	0.6224	1401	0.58177	1009	0.67703	966	0.58961	1748	0.61995	1300	0.60772		0.04063	-0.05463	0.03279	0.00245	0.01468		-0.01012	-1	0.01012	53	-53		0.00703	1	0.00703	53		-0.00744	-1	0.00744	-53		0.01154	1	0.01154	53		-0.00696	-1	0.00696	-53
cd00102	1463.68	207842	142	89	0.72	121	0.2288	6762	0.14527	6808	0.20202	5297	0.09346	13854	0.15606	6843	0.16597		0.08353	0.02678	0.13534	0.07274	0.06283		-0.01023	-1	0.01023	54	-54		-0.00712	-1	0.00712	-54		-0.00747	-1	0.00747	-54		-0.01233	-1	0.01233	-54		0.00704	1	0.00704	54
cd00104	625.077	170646	273	41	1.09	48	0.41723	7842	0.30074	5522	0.19557	3233	0.26458	15242	0.16304	6643	0.26684		0.11649	0.22166	0.15265	0.25419	0.15039		0.0107	1	0.0107	55	55		0.00724	1	0.00724	55		-0.00762	-1	0.00762	-55		-0.01299	-1	0.01299	-55		0.00707	1	0.00707	55
cd00105	740.726	410362	554	64	0.78	129	0.1091	10043	0.14839	8371	0.18707	5114	0.117	21074	0.09332	8086	0.11005		-0.03929	-0.07797	-0.0079	0.01578	-0.00095		-0.01116	-1	0.01116	56	-56		-0.00741	-1	0.00741	-56		0.00769	1	0.00769	56		-0.013	-1	0.013	-56		0.00712	1	0.00712	56
cd00107	70.2549	3583	51	33	1.08	42	0.80529	195	0.8664	200	0.78306	183	0.81803	266	0.7242	227	0.75353		-0.06111	0.02223	-0.01274	0.08109	0.05176		0.01163	1	0.01163	57	57		-0.00766	-1	0.00766	-57		-0.0079	-1	0.0079	-57		0.01305	1	0.01305	57		0.00723	1	0.00723	57
cd00109	886.489	83330	94	54	1.29	57	0.30792	5282	0.2777	6280	0.31504	3502	0.27008	9431	0.29292	4021	0.26297		0.03022	-0.00712	0.03784	0.015	0.04495		0.01222	1	0.01222	58	58		0.00828	1	0.00828	58		-0.00808	-1	0.00808	-58		-0.01305	-1	0.01305	-58		-0.00781	-1	0.00781	-58
cd00110	1992.74	227172	114	151	0.75	247	0.15313	9427	0.13484	10124	0.10392	6154	0.11187	23259	0.0599	7993	0.10627		0.01829	0.04921	0.04126	0.09323	0.04686		0.01282	1	0.01282	59	59		0.00829	1	0.00829	59		0.00846	1	0.00846	59		-0.01385	-1	0.01385	-59		0.00783	1	0.00783	59
cd00111	708.44	35422	50	44	1.42	81	0.36951	3606	0.42634	3839	0.4161	2840	0.31322	5202	0.39245	3011	0.31817		-0.05683	-0.04659	0.05629	-0.02294	0.05134		0.01295	1	0.01295	60	60		-0.00863	-1	0.00863	-60		-0.00848	-1	0.00848	-60		0.01391	1	0.01391	60		-0.00808	-1	0.00808	-60
cd00112	2333.33	1320665	566	35	1.27	34	0.00686	12881	0.04378	11671	0.03573	9941	0.03286	36833	0.02401	10478	0.03376		-0.03692	-0.02887	-0.026	-0.01715	-0.0269		0.01331	1	0.01331	61	61		-0.00872	-1	0.00872	-61		-0.00896	-1	0.00896	-61		0.01443	1	0.01443	61		0.00811	1	0.00811	61
cd00115	168.671	12313	73	141	1.1	126	0.7605	921	0.81864	856	0.70063	907	0.7892	1276	0.69463	880	0.76923		-0.05814	0.05987	-0.0287	0.06587	-0.00873		0.01335	1	0.01335	62	62		0.00905	1	0.00905	62		0.00896	1	0.00896	62		0.01449	1	0.01449	62		-0.00815	-1	0.00815	-62
cd00117	220.662	17653	80	81	1.06	112	0.37777	758	0.49518	702	0.49219	602	0.35922	862	0.38423	600	0.41321		-0.11741	-0.11442	0.01855	-0.00646	-0.03544		-0.01362	-1	0.01362	63	-63		0.00915	1	0.00915	63		-0.00897	-1	0.00897	-63		-0.01461	-1	0.01461	-63		-0.00824	-1	0.00824	-63
cd00118	460.064	1103693	2399	45	0.95	52	0.33362	24332	0.13126	33383	0.07913	8855	0.05725	0	0.001	26970	0.11341		0.20236	0.25449	0.27637	0.33262	0.22021		-0.01363	-1	0.01363	64	-64		0.00983	1	0.00983	64		0.00903	1	0.00903	64		0.015	1	0.015	64		0.0083	1	0.0083	64
cd00119	200.412	10221	51	124	1.6	119	0.81525	922	0.83975	932	0.82388	989	0.82373	931	0.77441	1059	0.82384		-0.0245	-0.00863	-0.00848	0.04084	-0.00859		-0.01366	-1	0.01366	65	-65		-0.0104	-1	0.0104	-65		-0.00941	-1	0.00941	-65		-0.01533	-1	0.01533	-65		-0.00859	-1	0.00859	-65
cd00121	599.261	211539	353	126	0.68	120	0.46046	18112	0.27141	16434	0.09753	10540	0.17673	29376	0.21049	15670	0.28236		0.18905	0.36293	0.28373	0.24997	0.1781		-0.01374	-1	0.01374	66	-66		-0.01067	-1	0.01067	-66		-0.0098	-1	0.0098	-66		0.01557	1	0.01557	66		-0.00873	-1	0.00873	-66
cd00127	358.731	18654	52	139	1.17	141	0.83803	2380	0.87427	2471	0.87164	1890	0.84496	3513	0.82906	2041	0.7812		-0.03624	-0.03361	-0.00693	0.00897	0.05683		0.01393	1	0.01393	67	67		-0.01078	-1	0.01078	-67		0.00982	1	0.00982	67		0.01563	1	0.01563	67		-0.00885	-1	0.00885	-67
cd00130	771.413	141940	184	103	0.42	211	0.19209	6551	0.07916	5119	0.09569	2940	0.10019	15602	0.10384	5067	0.08903		0.11293	0.0964	0.0919	0.08825	0.10306		-0.01409	-1	0.01409	68	-68		0.01092	1	0.01092	68		0.01016	1	0.01016	68		0.01578	1	0.01578	68		-0.00898	-1	0.00898	-68
cd00133	395.211	179821	455	85	0.68	81	0.54658	2946	0.4279	1690	0.47456	1151	0.35588	4853	0.33623	2817	0.39324		0.11868	0.07202	0.1907	0.21035	0.15334		0.01411	1	0.01411	69	69		0.01096	1	0.01096	69		0.01028	1	0.01028	69		0.01585	1	0.01585	69		0.00914	1	0.00914	69
cd00134	340.381	21444	63	219	0.81	220	0.64562	1648	0.66657	1704	0.6347	1820	0.59391	2373	0.60181	1692	0.60536		-0.02095	0.01092	0.05171	0.04381	0.04026		0.01418	1	0.01418	70	70		0.01107	1	0.01107	70		0.01048	1	0.01048	70		0.01682	1	0.01682	70		-0.00916	-1	0.00916	-70
cd00136	451.853	30726	68	70	0.77	73	0.47575	3794	0.40298	3735	0.35302	2155	0.26122	8804	0.32378	2539	0.40433		0.07277	0.12273	0.21453	0.15197	0.07142		-0.0146	-1	0.0146	71	-71		0.01112	1	0.01112	71		-0.01068	-1	0.01068	-71		-0.01715	-1	0.01715	-71		0.00923	1	0.00923	71
cd00138	547.923	42738	78	119	0.64	119	0.26457	2807	0.30256	2439	0.24186	1486	0.10394	6702	0.1643	2486	0.18609		-0.03799	0.02271	0.16063	0.10027	0.07848		0.01489	1	0.01489	72	72		0.01136	1	0.01136	72		-0.01071	-1	0.01071	-72		0.01731	1	0.01731	72		0.00961	1	0.00961	72
cd00140	378.741	42419	112	365	0.98	361	0.89632	834	0.8928	786	0.88525	762	0.9205	944	0.85116	987	0.88615		0.00352	0.01107	-0.02418	0.04516	0.01017		0.01541	1	0.01541	73	73		-0.01146	-1	0.01146	-73		-0.01089	-1	0.01089	-73		-0.01757	-1	0.01757	-73		0.01017	1	0.01017	73
cd00143	507.239	69999	138	257	0.83	230	0.68122	5273	0.61174	4444	0.67526	3470	0.71293	9334	0.5946	4473	0.63969		0.06948	0.00596	-0.03171	0.08662	0.04153		-0.01548	-1	0.01548	74	-74		0.01146	1	0.01146	74		0.01112	1	0.01112	74		0.01785	1	0.01785	74		-0.01022	-1	0.01022	-74
cd00146	2157.34	153171	71	81	0.78	132	0.08437	6344	0.03614	6489	0.05894	5031	0.02326	12965	0.05439	5443	0.04096		0.04823	0.02543	0.06111	0.02998	0.04341		0.01556	1	0.01556	75	75		-0.01163	-1	0.01163	-75		0.01135	1	0.01135	75		0.01803	1	0.01803	75		0.01027	1	0.01027	75
cd00156	388.727	119728	308	113	0.85	125	0.8351	9253	0.59677	6183	0.43288	3471	0.57374	13800	0.60507	6396	0.75222		0.23833	0.40222	0.26136	0.23003	0.08288		0.01568	1	0.01568	76	76		-0.01165	-1	0.01165	-76		0.01151	1	0.01151	76		0.01852	1	0.01852	76		0.01035	1	0.01035	76
cd00158	255.282	79648	312	89	0.83	94	0.73375	3510	0.57578	2290	0.64591	1728	0.62864	5442	0.61739	1867	0.65934		0.15797	0.08784	0.10511	0.11636	0.07441		-0.01581	-1	0.01581	77	-77		0.01187	1	0.01187	77		0.01158	1	0.01158	77		0.01861	1	0.01861	77		0.01037	1	0.01037	77
cd00159	799.646	144736	181	169	0.79	186	0.76702	8623	0.63028	7655	0.68503	4073	0.35879	29642	0.55327	7369	0.57541		0.13674	0.08199	0.40823	0.21375	0.19161		-0.01597	-1	0.01597	78	-78		-0.01227	-1	0.01227	-78		-0.01172	-1	0.01172	-78		-0.01897	-1	0.01897	-78		0.0104	1	0.0104	78
cd00160	1097.66	73543	67	180	0.88	316	0.69567	8741	0.62456	8617	0.74046	7082	0.67425	19763	0.55267	7783	0.62275		0.07111	-0.04479	0.02142	0.143	0.07292		0.01621	1	0.01621	79	79		0.01228	1	0.01228	79		-0.01179	-1	0.01179	-79		0.01903	1	0.01903	79		0.01049	1	0.01049	79
cd00161	577.2	60606	105	123	0.79	117	0.40814	5087	0.34333	4187	0.42569	3009	0.3587	10938	0.20213	4799	0.40159		0.06481	-0.01755	0.04944	0.20601	0.00655		0.01628	1	0.01628	80	80		-0.0123	-1	0.0123	-80		-0.01238	-1	0.01238	-80		0.01948	1	0.01948	80		-0.01051	-1	0.01051	-80
cd00162	538.016	299137	556	45	1.08	52	0.83278	15673	0.30747	24409	0.36785	8246	0.22026	56217	0.47076	15331	0.45891		0.52531	0.46493	0.61252	0.36202	0.37387		0.01629	1	0.01629	81	81		0.01272	1	0.01272	81		0.01263	1	0.01263	81		0.0196	1	0.0196	81		0.01054	1	0.01054	81
cd00164	735.477	80167	109	65	0.87	73	0.11775	3897	0.25008	2971	0.22183	2782	0.10879	5728	0.16704	2946	0.11967		-0.13233	-0.10408	0.00896	-0.04929	-0.00192		-0.01661	-1	0.01661	82	-82		0.01296	1	0.01296	82		-0.01274	-1	0.01274	-82		0.02003	1	0.02003	82		-0.01073	-1	0.01073	-82
cd00165	282.007	75296	267	74	0.73	57	0.72098	3541	0.55872	2394	0.7278	2116	0.24971	4300	0.68476	3206	0.28052		0.16226	-0.00682	0.47127	0.03622	0.44046		0.01685	1	0.01685	83	83		-0.01296	-1	0.01296	-83		0.01279	1	0.01279	83		0.02025	1	0.02025	83		0.01101	1	0.01101	83
cd00167	625.602	106978	171	45	0.94	54	0.33757	5467	0.12132	5893	0.23741	3388	0.11035	16599	0.17756	4723	0.19317		0.21625	0.10016	0.22722	0.16001	0.1444		-0.01716	-1	0.01716	84	-84		-0.01297	-1	0.01297	-84		-0.01285	-1	0.01285	-84		-0.02044	-1	0.02044	-84		0.01102	1	0.01102	84
cd00170	535.555	58911	110	157	0.71	175	0.61934	5626	0.5112	4681	0.54837	3883	0.50593	9689	0.54035	4397	0.55456		0.10814	0.07097	0.11341	0.07899	0.06478		0.01747	1	0.01747	85	85		-0.0132	-1	0.0132	-85		-0.01301	-1	0.01301	-85		-0.02045	-1	0.02045	-85		-0.01103	-1	0.01103	-85
cd00172	424.793	39081	92	364	0.96	359	0.83971	1478	0.88243	1425	0.8649	1275	0.8506	1874	0.78667	1691	0.82462		-0.04272	-0.02519	-0.01089	0.05304	0.01509		-0.0176	-1	0.0176	86	-86		0.01395	1	0.01395	86		0.01303	1	0.01303	86		-0.02048	-1	0.02048	-86		0.01109	1	0.01109	86
cd00173	742.909	261504	352	78	0.78	97	0.5069	9716	0.17578	13939	0.08322	4700	0.03397	44041	0.14488	12950	0.1383		0.33112	0.42368	0.47293	0.36202	0.3686		0.01782	1	0.01782	87	87		-0.0143	-1	0.0143	-87		-0.01327	-1	0.01327	-87		0.02136	1	0.02136	87		-0.0119	-1	0.0119	-87
cd00174	744.598	384957	517	51	1.08	55	0.58641	14749	0.24231	20395	0.19566	7279	0.27085	61449	0.24968	19044	0.20555		0.3441	0.39075	0.31556	0.33673	0.38086		0.01812	1	0.01812	88	88		-0.0144	-1	0.0144	-88		0.01332	1	0.01332	88		-0.02155	-1	0.02155	-88		0.01204	1	0.01204	88
cd00176	2740.02	463063	169	213	0.54	920	0.01697	11141	0.02624	8306	0.02008	7995	0.02768	19908	0.01404	6691	0.02595		-0.00927	-0.00311	-0.01071	0.00293	-0.00898		0.01829	1	0.01829	89	89		0.01447	1	0.01447	89		0.01354	1	0.01354	89		-0.0216	-1	0.0216	-89		-0.01206	-1	0.01206	-89
cd00178	203.808	10598	52	172	1.09	160	0.77457	370	0.86409	362	0.80832	360	0.77797	476	0.63061	469	0.76627		-0.08952	-0.03375	-0.0034	0.14396	0.0083		-0.01855	-1	0.01855	90	-90		0.01494	1	0.01494	90		0.01362	1	0.01362	90		0.0219	1	0.0219	90		0.0122	1	0.0122	90
cd00179	283.1	19817	70	152	1.24	229	0.73821	420	0.83761	403	0.85804	385	0.82488	444	0.85495	454	0.79886		-0.0994	-0.11983	-0.08667	-0.11674	-0.06065		-0.01864	-1	0.01864	91	-91		-0.01516	-1	0.01516	-91		-0.01365	-1	0.01365	-91		0.02217	1	0.02217	91		-0.01241	-1	0.01241	-91
cd00181	510.295	31128	61	128	0.73	507	0.71041	1194	0.76827	1164	0.72902	1211	0.77664	1571	0.69456	1252	0.6961		-0.05786	-0.01861	-0.06623	0.01585	0.01431		0.01876	1	0.01876	92	92		0.01521	1	0.01521	92		-0.01379	-1	0.01379	-92		-0.02225	-1	0.02225	-92		0.01264	1	0.01264	92
cd00185	635.912	72494	114	85	0.91	92	0.5765	8143	0.45723	8151	0.46536	5967	0.45097	18022	0.33635	5621	0.5156		0.11927	0.11114	0.12553	0.24015	0.0609		-0.01878	-1	0.01878	93	-93		-0.01527	-1	0.01527	-93		0.01385	1	0.01385	93		0.02233	1	0.02233	93		0.01271	1	0.01271	93
cd00186	848.635	53464	63	417	1.07	521	0.77311	3439	0.8339	3092	0.7988	2885	0.7926	4463	0.80708	3960	0.78126		-0.06079	-0.02569	-0.01949	-0.03397	-0.00815		0.01916	1	0.01916	94	94		-0.01585	-1	0.01585	-94		0.01396	1	0.01396	94		-0.02252	-1	0.02252	-94		0.01337	1	0.01337	94
cd00187	982.224	56969	58	444	1.47	431	0.87406	2487	0.90806	2313	0.91837	2094	0.55488	3315	0.88446	2580	0.89256		-0.034	-0.04431	0.31918	-0.0104	-0.0185		-0.01929	-1	0.01929	95	-95		0.01604	1	0.01604	95		-0.01402	-1	0.01402	-95		-0.02286	-1	0.02286	-95		0.01355	1	0.01355	95
cd00188	635.282	388157	611	83	0.57	114	0.56442	12499	0.10909	6796	0.17397	3190	0.04659	27534	0.45035	11958	0.10835		0.45533	0.39045	0.51783	0.11407	0.45607		-0.01929	-1	0.01929	96	-96		0.01608	1	0.01608	96		0.0142	1	0.0142	96		-0.02294	-1	0.02294	-96		-0.01361	-1	0.01361	-96
cd00190	374.011	66574	178	232	1.07	215	0.80773	5312	0.76231	4008	0.8207	2947	0.81061	7136	0.67861	3693	0.7648		0.04542	-0.01297	-0.00288	0.12912	0.04293		-0.02006	-1	0.02006	97	-97		0.01613	1	0.01613	97		0.01427	1	0.01427	97		0.02327	1	0.02327	97		-0.0138	-1	0.0138	-97
cd00191	1411.33	121374	86	66	1.15	73	0.21672	4567	0.21423	4601	0.20844	3572	0.14649	8273	0.12095	3504	0.11541		0.00249	0.00828	0.07023	0.09577	0.10131		-0.02082	-1	0.02082	98	-98		0.01624	1	0.01624	98		-0.01429	-1	0.01429	-98		0.02332	1	0.02332	98		-0.01389	-1	0.01389	-98
cd00195	314.408	22323	71	141	1.16	146	0.77248	5650	0.74912	5785	0.77489	5741	0.77594	6807	0.70981	5892	0.79795		0.02336	-0.00241	-0.00346	0.06267	-0.02547		-0.02095	-1	0.02095	99	-99		-0.01658	-1	0.01658	-99		0.01442	1	0.01442	99		0.02332	1	0.02332	99		0.01421	1	0.01421	99
cd00196	408.288	256405	628	69	0.48	73	0.50278	10717	0.09124	8009	0.05753	4159	0.0445	32627	0.12476	10392	0.14916		0.41154	0.44525	0.45828	0.37802	0.35362		0.021	1	0.021	100	100		-0.0166	-1	0.0166	-100		-0.01459	-1	0.01459	-100		-0.02349	-1	0.02349	-100		0.01431	1	0.01431	100
cd00198	854.849	141905	166	161	0.54	168	0.42965	15467	0.09753	25087	0.09041	13077	0.07419	44021	0.15292	13846	0.24694		0.33212	0.33924	0.35546	0.27673	0.18271		-0.02109	-1	0.02109	101	-101		-0.01671	-1	0.01671	-101		0.0147	1	0.0147	101		-0.02354	-1	0.02354	-101		-0.01447	-1	0.01447	-101
cd00200	633.549	57653	91	289	0.87	293	0.39905	5779	0.33075	4572	0.24676	3665	0.33282	11070	0.10213	4798	0.37363		0.0683	0.15229	0.06623	0.29692	0.02542		0.02126	1	0.02126	102	102		-0.01706	-1	0.01706	-102		-0.01505	-1	0.01505	-102		0.02403	1	0.02403	102		-0.01464	-1	0.01464	-102
cd00201	740.133	99918	135	31	1.29	34	0.44998	7148	0.38231	7171	0.37734	4850	0.23934	18039	0.30613	6120	0.1965		0.06767	0.07264	0.21064	0.14385	0.25348		0.02128	1	0.02128	103	103		-0.01714	-1	0.01714	-103		-0.01507	-1	0.01507	-103		0.02435	1	0.02435	103		-0.01466	-1	0.01466	-103
cd00204	977.633	335328	343	126	0.69	169	0.06575	17093	0.06128	15703	0.04332	10567	0.04366	41752	0.03478	12131	0.04717		0.00447	0.02243	0.02209	0.03097	0.01858		0.0214	1	0.0214	104	104		-0.0172	-1	0.0172	-104		-0.01552	-1	0.01552	-104		0.02469	1	0.02469	104		0.01468	1	0.01468	104
cd00205	1495.4	154026	103	177	0.77	202	0.26065	6416	0.24524	5756	0.2516	4300	0.23441	9698	0.2213	6018	0.22296		0.01541	0.00905	0.02624	0.03935	0.03769		-0.0216	-1	0.0216	105	-105		-0.01725	-1	0.01725	-105		0.0156	1	0.0156	105		0.0247	1	0.0247	105		-0.01483	-1	0.01483	-105
cd00207	342.393	67109	196	84	0.89	72	0.66991	3521	0.66422	2839	0.36633	1908	0.43617	5533	0.54432	3311	0.61503		0.00569	0.30358	0.23374	0.12559	0.05488		-0.02161	-1	0.02161	106	-106		0.0173	1	0.0173	106		0.01573	1	0.01573	106		-0.02473	-1	0.02473	-106		0.01509	1	0.01509	106
cd00209	206.648	26451	128	157	1.18	155	0.85437	1338	0.79852	1135	0.80457	1363	0.82989	1502	0.75793	1325	0.80733		0.05585	0.0498	0.02448	0.09644	0.04704		0.02162	1	0.02162	107	107		-0.01755	-1	0.01755	-107		-0.01574	-1	0.01574	-107		-0.02522	-1	0.02522	-107		0.01525	1	0.01525	107
cd00211	377.491	41524	110	136	0.89	139	0.83525	2885	0.78537	2134	0.81052	1820	0.77925	3091	0.64204	2207	0.75956		0.04988	0.02473	0.056	0.19321	0.07569		0.02165	1	0.02165	108	108		0.01773	1	0.01773	108		-0.0158	-1	0.0158	-108		0.02533	1	0.02533	108		-0.01526	-1	0.01526	-108
cd00212	513.056	45662	89	78	1.22	313	0.09735	1326	0.44521	1579	0.82505	1208	0.32055	1914	0.81609	1787	0.4082		-0.34786	-0.7277	-0.2232	-0.71874	-0.31085		-0.02225	-1	0.02225	109	-109		0.01788	1	0.01788	109		0.01626	1	0.01626	109		-0.02571	-1	0.02571	-109		-0.01532	-1	0.01532	-109
cd00213	264.23	35671	135	88	1.37	91	0.91998	3787	0.92004	4834	0.913	3288	0.91907	7861	0.82522	3714	0.9153		-6e-05	0.00698	0.00091	0.09476	0.00468		-0.02232	-1	0.02232	110	-110		0.01824	1	0.01824	110		0.0165	1	0.0165	110		0.02588	1	0.02588	110		-0.01536	-1	0.01536	-110
cd00222	1695.94	206905	122	92	1.09	420	0.10921	9283	0.11127	9188	0.13147	7409	0.0918	20815	0.05967	7252	0.07236		-0.00206	-0.02226	0.01741	0.04954	0.03685		-0.02265	-1	0.02265	111	-111		-0.01831	-1	0.01831	-111		-0.01676	-1	0.01676	-111		0.02591	1	0.02591	111		0.01539	1	0.01539	111
cd00229	442.266	83146	188	188	0.45	160	0.4441	7320	0.18509	5942	0.32037	3079	0.19676	15756	0.34253	4451	0.32731		0.25901	0.12373	0.24734	0.10157	0.11679		-0.02299	-1	0.02299	112	-112		-0.01861	-1	0.01861	-112		-0.01702	-1	0.01702	-112		-0.02599	-1	0.02599	-112		0.0154	1	0.0154	112
cd00241	614.019	63858	104	159	0.42	113	0.16734	4416	0.03311	4125	0.08301	2054	0.02812	13809	0.13641	3683	0.10966		0.13423	0.08433	0.13922	0.03093	0.05768		-0.02309	-1	0.02309	113	-113		-0.01873	-1	0.01873	-113		-0.01713	-1	0.01713	-113		0.02617	1	0.02617	113		0.01554	1	0.01554	113
cd00253	1173.42	89180	76	185	0.8	479	0.4963	6202	0.48002	6073	0.54505	4617	0.49235	14379	0.38982	6378	0.39513		0.01628	-0.04875	0.00395	0.10648	0.10117		0.02316	1	0.02316	114	114		-0.01873	-1	0.01873	-114		-0.0174	-1	0.0174	-114		0.02636	1	0.02636	114		-0.01557	-1	0.01557	-114
cd00267	480.86	89440	186	208	0.74	206	0.53281	7954	0.45752	4536	0.47072	2805	0.47857	12545	0.44659	4834	0.4769		0.07529	0.06209	0.05424	0.08622	0.05591		0.02336	1	0.02336	115	115		-0.01877	-1	0.01877	-115		0.01741	1	0.01741	115		-0.0265	-1	0.0265	-115		-0.01568	-1	0.01568	-115
cd00291	142.021	27410	193	69	0.96	72	0.88688	1869	0.86156	1324	0.89234	1057	0.87785	2030	0.78832	1098	0.89252		0.02532	-0.00546	0.00903	0.09856	-0.00564		0.02415	1	0.02415	116	116		0.01997	1	0.01997	116		-0.01741	-1	0.01741	-116		-0.0267	-1	0.0267	-116		0.01599	1	0.01599	116
cd00296	414.361	50552	122	219	0.98	223	0.63934	4421	0.62864	4118	0.68456	4023	0.6258	7590	0.62073	4442	0.60328		0.0107	-0.04522	0.01354	0.01861	0.03606		-0.0245	-1	0.0245	117	-117		0.02001	1	0.02001	117		0.01743	1	0.01743	117		0.02691	1	0.02691	117		0.01649	1	0.01649	117
cd00298	224.453	257448	1147	85	0.72	91	0.77384	8808	0.55391	4635	0.35289	6228	0.46216	17525	0.50315	6837	0.71603		0.21993	0.42095	0.31168	0.27069	0.05781		0.02486	1	0.02486	118	118		-0.02015	-1	0.02015	-118		-0.01792	-1	0.01792	-118		0.02708	1	0.02708	118		0.01656	1	0.01656	118
cd00299	266.874	36028	135	100	0.52	179	0.56754	2070	0.38687	1726	0.48078	1751	0.52979	2724	0.415	1989	0.53907		0.18067	0.08676	0.03775	0.15254	0.02847		0.02532	1	0.02532	119	119		0.02016	1	0.02016	119		0.01855	1	0.01855	119		0.02778	1	0.02778	119		0.01736	1	0.01736	119
cd00305	183.809	12499	68	144	1.21	137	0.70543	720	0.75807	689	0.76156	751	0.73122	787	0.70085	954	0.74204		-0.05264	-0.05613	-0.02579	0.00458	-0.03661		-0.02545	-1	0.02545	120	-120		-0.02018	-1	0.02018	-120		0.01875	1	0.01875	120		0.02783	1	0.02783	120		0.01748	1	0.01748	120
cd00306	686.336	188056	274	233	0.61	233	0.50928	13340	0.3129	9063	0.39054	5914	0.4281	29811	0.50334	12923	0.36175		0.19638	0.11874	0.08118	0.00594	0.14753		0.0255	1	0.0255	121	121		-0.02026	-1	0.02026	-121		-0.01891	-1	0.01891	-121		-0.02803	-1	0.02803	-121		-0.01748	-1	0.01748	-121
cd00316	500.708	77109	154	403	0.86	402	0.68072	2117	0.70371	2232	0.39659	2070	0.69399	2552	0.37809	2174	0.68218		-0.02299	0.28413	-0.01327	0.30263	-0.00146		0.0264	1	0.0264	122	122		-0.02085	-1	0.02085	-122		-0.01949	-1	0.01949	-122		0.02848	1	0.02848	122		-0.01757	-1	0.01757	-122
cd00317	284.859	26207	92	146	1.1	138	0.7251	2818	0.76814	2624	0.70897	2027	0.73248	4494	0.66109	2206	0.67954		-0.04304	0.01613	-0.00738	0.06401	0.04556		-0.02677	-1	0.02677	123	-123		0.02089	1	0.02089	123		-0.01953	-1	0.01953	-123		0.02921	1	0.02921	123		-0.01762	-1	0.01762	-123
cd00320	118.48	11611	98	93	1.21	90	0.81967	520	0.88272	400	0.85839	415	0.82681	526	0.77391	557	0.82627		-0.06305	-0.03872	-0.00714	0.04576	-0.0066		0.0271	1	0.0271	124	124		-0.02191	-1	0.02191	-124		0.02013	1	0.02013	124		0.0295	1	0.0295	124		-0.0185	-1	0.0185	-124
cd00321	420.476	44150	105	159	1.19	171	0.85187	2281	0.86199	1958	0.86414	1648	0.8769	3088	0.84099	2562	0.86719		-0.01012	-0.01227	-0.02503	0.01088	-0.01532		0.02775	1	0.02775	125	125		0.02223	1	0.02223	125		0.02048	1	0.02048	125		0.02969	1	0.02969	125		0.01858	1	0.01858	125
cd00322	396.184	34468	87	223	0.7	213	0.59115	2373	0.63767	2243	0.60261	1731	0.58087	4910	0.44712	2134	0.54753		-0.04652	-0.01146	0.01028	0.14403	0.04362		-0.02789	-1	0.02789	126	-126		-0.02226	-1	0.02226	-126		0.02071	1	0.02071	126		-0.02984	-1	0.02984	-126		0.01858	1	0.01858	126
cd00326	363.299	64304	177	227	1.07	215	0.74014	5177	0.72603	4332	0.74307	4545	0.76929	6903	0.6526	5035	0.7554		0.01411	-0.00293	-0.02915	0.08754	-0.01526		-0.0279	-1	0.0279	127	-127		0.02243	1	0.02243	127		-0.02078	-1	0.02078	-127		0.02998	1	0.02998	127		0.01869	1	0.01869	127
cd00329	733.902	216501	295	106	0.78	387	0.60419	5995	0.47262	4365	0.40136	4026	0.50904	11249	0.49215	7518	0.54013		0.13157	0.20283	0.09515	0.11204	0.06406		0.0279	1	0.0279	128	128		0.02251	1	0.02251	128		-0.02091	-1	0.02091	-128		0.03039	1	0.03039	128		0.01893	1	0.01893	128
cd00336	173.158	23030	133	105	1.12	109	0.93919	1185	0.9008	1015	0.92936	1041	0.88552	1504	0.9247	1045	0.92564		0.03839	0.00983	0.05367	0.01449	0.01355		0.02857	1	0.02857	129	129		0.02271	1	0.02271	129		0.021	1	0.021	129		-0.03044	-1	0.03044	-129		0.01913	1	0.01913	129
cd00338	470.167	84630	180	137	0.79	211	0.77321	2314	0.68234	1550	0.72362	1108	0.74163	3605	0.66603	1945	0.71609		0.09087	0.04959	0.03158	0.10718	0.05712		-0.02862	-1	0.02862	130	-130		0.02284	1	0.02284	130		0.02106	1	0.02106	130		0.03076	1	0.03076	130		0.01925	1	0.01925	130
cd00347	430.445	110194	256	217	0.41	288	0.30394	9264	0.25041	8448	0.30226	8486	0.282	10098	0.25636	8779	0.28065		0.05353	0.00168	0.02194	0.04758	0.02329		-0.02879	-1	0.02879	131	-131		-0.02286	-1	0.02286	-131		0.02112	1	0.02112	131		0.03093	1	0.03093	131		0.01934	1	0.01934	131
cd00349	160.616	22165	138	131	1.32	138	0.92412	561	0.91077	516	0.91751	518	0.90246	573	0.89462	586	0.91208		0.01335	0.00661	0.02166	0.0295	0.01204		0.0292	1	0.0292	132	132		-0.02317	-1	0.02317	-132		0.02142	1	0.02142	132		0.03097	1	0.03097	132		0.01945	1	0.01945	132
cd00350	164.315	11995	73	36	1.5	34	0.80518	1255	0.8648	1222	0.63531	965	0.71712	1717	0.86596	1191	0.78415		-0.05962	0.16987	0.08806	-0.06078	0.02103		0.02923	1	0.02923	133	133		-0.02324	-1	0.02324	-133		-0.02156	-1	0.02156	-133		0.03145	1	0.03145	133		0.01994	1	0.01994	133
cd00351	338.857	23720	70	219	1.4	212	0.79366	1508	0.8561	1546	0.81384	1612	0.80128	2266	0.81414	1595	0.80572		-0.06244	-0.02018	-0.00762	-0.02048	-0.01206		-0.02947	-1	0.02947	134	-134		0.02346	1	0.02346	134		0.02166	1	0.02166	134		-0.03159	-1	0.03159	-134		-0.02026	-1	0.02026	-134
cd00352	661.687	422156	638	220	0.78	244	0.67691	6163	0.61939	4895	0.63177	4329	0.4995	8168	0.53082	7586	0.47636		0.05752	0.04514	0.17741	0.14609	0.20055		-0.02973	-1	0.02973	135	-135		-0.02354	-1	0.02354	-135		0.02169	1	0.02169	135		0.03224	1	0.03224	135		0.02047	1	0.02047	135
cd00355	129.557	22543	174	53	1.15	57	0.99505	616	0.9319	534	0.99654	526	0.96496	666	0.99184	659	0.97647		0.06315	-0.00149	0.03009	0.00321	0.01858		0.03022	1	0.03022	136	136		0.0238	1	0.0238	136		0.02176	1	0.02176	136		0.03226	1	0.03226	136		0.02103	1	0.02103	136
cd00361	382.833	22970	60	221	1.57	236	0.97228	1022	0.97925	985	0.97623	973	0.96706	1138	0.97442	1131	0.96658		-0.00697	-0.00395	0.00522	-0.00214	0.0057		-0.03029	-1	0.03029	137	-137		-0.02385	-1	0.02385	-137		-0.02187	-1	0.02187	-137		0.03227	1	0.03227	137		0.02169	1	0.02169	137
cd00367	297.538	35407	119	77	1.1	83	0.94092	1431	0.92929	1378	0.89048	1224	0.93436	1575	0.93446	1485	0.93169		0.01163	0.05044	0.00656	0.00646	0.00923		-0.0303	-1	0.0303	138	-138		0.02433	1	0.02433	138		0.02194	1	0.02194	138		0.03258	1	0.03258	138		0.02184	1	0.02184	138
cd00368	814.607	285927	351	475	0.7	526	0.58146	6149	0.57161	4268	0.6242	4531	0.49998	7836	0.62599	6898	0.59714		0.00985	-0.04274	0.08148	-0.04453	-0.01568		-0.03054	-1	0.03054	139	-139		-0.02468	-1	0.02468	-139		0.02194	1	0.02194	139		0.03268	1	0.03268	139		-0.02217	-1	0.02217	-139
cd00371	656.217	69559	106	63	1.05	70	0.50412	1964	0.52267	1928	0.48128	1695	0.5497	2822	0.32682	2016	0.45297		-0.01855	0.02284	-0.04558	0.1773	0.05115		-0.03087	-1	0.03087	140	-140		0.02473	1	0.02473	140		0.02209	1	0.02209	140		0.03291	1	0.03291	140		0.02218	1	0.02218	140
cd00374	263.247	25535	97	195	0.96	168	0.61941	1008	0.73973	871	0.72636	1002	0.70432	1254	0.63986	1180	0.67356		-0.12032	-0.10695	-0.08491	-0.02045	-0.05415		-0.03096	-1	0.03096	141	-141		-0.02498	-1	0.02498	-141		0.02275	1	0.02275	141		0.03312	1	0.03312	141		0.02221	1	0.02221	141
cd00379	213.415	47805	224	155	0.82	158	0.72362	821	0.73082	727	0.7295	655	0.76175	982	0.74522	939	0.7606		-0.0072	-0.00588	-0.03813	-0.0216	-0.03698		-0.03142	-1	0.03142	142	-142		-0.02507	-1	0.02507	-142		-0.02277	-1	0.02277	-142		-0.03337	-1	0.03337	-142		0.02225	1	0.02225	142
cd00382	254.311	41707	164	159	1	173	0.75969	1692	0.74348	1566	0.78532	1346	0.77543	2295	0.73436	1774	0.72278		0.01621	-0.02563	-0.01574	0.02533	0.03691		-0.03257	-1	0.03257	143	-143		-0.02519	-1	0.02519	-143		0.02292	1	0.02292	143		-0.03389	-1	0.03389	-143		0.0225	1	0.0225	143
cd00383	241.794	126700	524	94	1.01	216	0.89732	2328	0.84795	1955	0.88586	2372	0.81324	3592	0.85271	2829	0.88133		0.04937	0.01146	0.08408	0.04461	0.01599		-0.03271	-1	0.03271	144	-144		-0.02525	-1	0.02525	-144		-0.02327	-1	0.02327	-144		-0.03397	-1	0.03397	-144		0.02251	1	0.02251	144
cd00384	330.014	24421	74	314	1.75	318	0.97146	483	0.97659	455	0.98213	458	0.97677	486	0.97253	595	0.97216		-0.00513	-0.01067	-0.00531	-0.00107	-0.0007		0.03315	1	0.03315	145	145		-0.02541	-1	0.02541	-145		0.02363	1	0.02363	145		0.03445	1	0.03445	145		0.02329	1	0.02329	145
cd00385	417.966	135839	325	243	0.56	244	0.46717	2670	0.33541	2243	0.32479	1789	0.2747	4834	0.39752	2672	0.34419		0.13176	0.14238	0.19247	0.06965	0.12298		-0.03331	-1	0.03331	146	-146		0.02543	1	0.02543	146		0.02374	1	0.02374	146		0.03472	1	0.03472	146		-0.02344	-1	0.02344	-146
cd00386	273.382	46475	170	186	0.98	189	0.7953	1588	0.73301	1324	0.81847	1601	0.7632	1677	0.81685	1676	0.78913		0.06229	-0.02317	0.0321	-0.02155	0.00617		0.03338	1	0.03338	147	147		-0.02563	-1	0.02563	-147		0.02378	1	0.02378	147		0.03563	1	0.03563	147		0.02353	1	0.02353	147
cd00387	156.744	20220	129	125	1.15	122	0.82607	806	0.84204	751	0.83124	706	0.84698	1137	0.82269	915	0.83085		-0.01597	-0.00517	-0.02091	0.00338	-0.00478		0.03347	1	0.03347	148	148		-0.02569	-1	0.02569	-148		0.0239	1	0.0239	148		0.03566	1	0.03566	148		0.02354	1	0.02354	148
cd00392	173.677	23099	133	114	1.3	108	0.75488	985	0.83574	914	0.86797	896	0.89613	1052	0.93442	1118	0.84779		-0.08086	-0.11309	-0.14125	-0.17954	-0.09291		-0.034	-1	0.034	149	-149		-0.02609	-1	0.02609	-149		-0.02405	-1	0.02405	-149		0.03604	1	0.03604	149		0.02374	1	0.02374	149
cd00397	343.663	56017	163	166	0.63	177	0.57446	2474	0.43889	1885	0.51048	1481	0.56167	4612	0.4732	1507	0.44335		0.13557	0.06398	0.01279	0.10126	0.13111		0.03503	1	0.03503	150	150		-0.02635	-1	0.02635	-150		-0.02418	-1	0.02418	-150		0.03622	1	0.03622	150		-0.02428	-1	0.02428	-150
cd00400	564.212	63756	113	385	0.84	411	0.79066	1734	0.75563	1375	0.8213	1305	0.80007	2116	0.81637	1996	0.78152		0.03503	-0.03064	-0.00941	-0.02571	0.00914		-0.03505	-1	0.03505	151	-151		-0.02649	-1	0.02649	-151		-0.02427	-1	0.02427	-151		0.0363	1	0.0363	151		-0.02474	-1	0.02474	-151
cd00403	286.624	61051	213	206	0.93	202	0.72882	3703	0.74543	3378	0.75073	3275	0.77107	4706	0.68668	3678	0.73005		-0.01661	-0.02191	-0.04225	0.04214	-0.00123		0.0356	1	0.0356	152	152		0.02666	1	0.02666	152		0.02441	1	0.02441	152		0.03694	1	0.03694	152		0.02475	1	0.02475	152
cd00412	223.374	20327	91	155	1.42	160	0.92379	701	0.92354	624	0.9235	610	0.90819	880	0.82135	882	0.90434		0.00025	0.00029	0.0156	0.10244	0.01945		0.0357	1	0.0357	153	153		0.02678	1	0.02678	153		-0.02442	-1	0.02442	-153		-0.03698	-1	0.03698	-153		0.02542	1	0.02542	153
cd00413	379.477	32635	86	212	0.8	182	0.57073	3012	0.65963	2868	0.586	2498	0.48092	4949	0.47704	2990	0.46492		-0.0889	-0.01527	0.08981	0.09369	0.10581		-0.03588	-1	0.03588	154	-154		-0.02712	-1	0.02712	-154		0.02448	1	0.02448	154		0.03793	1	0.03793	154		-0.02547	-1	0.02547	-154
cd00421	270.374	39745	147	152	1.01	157	0.73421	796	0.74787	657	0.76215	621	0.71047	1158	0.67476	1047	0.71487		-0.01366	-0.02794	0.02374	0.05945	0.01934		-0.03596	-1	0.03596	155	-155		-0.02794	-1	0.02794	-155		-0.02451	-1	0.02451	-155		0.03808	1	0.03808	155		-0.02555	-1	0.02555	-155
cd00427	81.9655	14262	174	57	1.07	62	0.9693	603	0.96652	463	0.98945	457	0.9425	582	0.94598	475	0.96611		0.00278	-0.02015	0.0268	0.02332	0.00319		-0.03624	-1	0.03624	156	-156		-0.02798	-1	0.02798	-156		0.0249	1	0.0249	156		0.03825	1	0.03825	156		-0.02583	-1	0.02583	-156
cd00431	213.873	43630	204	162	0.81	156	0.80888	1809	0.73023	1756	0.72238	1651	0.76503	2045	0.7804	1919	0.752		0.07865	0.0865	0.04385	0.02848	0.05688		-0.03692	-1	0.03692	157	-157		0.028	1	0.028	157		-0.02493	-1	0.02493	-157		0.03925	1	0.03925	157		0.02652	1	0.02652	157
cd00432	180.706	24576	136	103	1.06	114	0.79726	1225	0.78504	875	0.77938	886	0.76918	1530	0.82376	1092	0.77372		0.01222	0.01788	0.02808	-0.0265	0.02354		-0.03753	-1	0.03753	158	-158		0.02805	1	0.02805	158		-0.02503	-1	0.02503	-158		0.03935	1	0.03935	158		-0.0269	-1	0.0269	-158
cd00433	504.699	98921	196	469	1.05	433	0.77612	1553	0.77114	1290	0.77802	1237	0.77952	2031	0.74344	1955	0.76503		0.00498	-0.0019	-0.0034	0.03268	0.01109		-0.03799	-1	0.03799	159	-159		0.02826	1	0.02826	159		-0.0252	-1	0.0252	-159		0.03961	1	0.03961	159		0.02693	1	0.02693	159
cd00446	205.358	31009	151	136	1.13	174	0.92602	604	0.9082	561	0.94926	446	0.95044	794	0.93835	879	0.94049		0.01782	-0.02324	-0.02442	-0.01233	-0.01447		0.03805	1	0.03805	160	160		-0.02839	-1	0.02839	-160		-0.02533	-1	0.02533	-160		0.03967	1	0.03967	160		0.02717	1	0.02717	160
cd00448	202.237	172508	853	107	0.88	118	0.75554	7622	0.60765	3761	0.69458	4437	0.65047	8202	0.64987	3854	0.69417		0.14789	0.06096	0.10507	0.10567	0.06137		0.03824	1	0.03824	161	161		-0.02841	-1	0.02841	-161		-0.02548	-1	0.02548	-161		-0.03967	-1	0.03967	-161		0.02727	1	0.02727	161
cd00449	319.979	30398	95	255	0.98	261	0.78748	861	0.82686	785	0.79154	788	0.81993	1066	0.68696	954	0.76579		-0.03938	-0.00406	-0.03245	0.10052	0.02169		0.03839	1	0.03839	162	162		-0.02841	-1	0.02841	-162		-0.02579	-1	0.02579	-162		0.0405	1	0.0405	162		0.02763	1	0.02763	162
cd00462	198.169	30518	154	171	1.25	183	0.90505	659	0.88949	464	0.91125	444	0.90068	628	0.9	601	0.9089		0.01556	-0.0062	0.00437	0.00505	-0.00385		0.03881	1	0.03881	163	163		-0.02849	-1	0.02849	-163		0.02579	1	0.02579	163		0.04084	1	0.04084	163		0.02783	1	0.02783	163
cd00466	149.411	13447	90	140	1.59	141	0.9848	235	0.99056	233	0.98412	236	0.98443	250	0.96344	408	0.97143		-0.00576	0.00068	0.00037	0.02136	0.01337		-0.03929	-1	0.03929	164	-164		-0.02862	-1	0.02862	-164		-0.026	-1	0.026	-164		0.04086	1	0.04086	164		-0.028	-1	0.028	-164
cd00472	130.014	9491	73	54	1.66	60	0.96887	274	0.9825	268	0.98403	230	0.97355	343	0.99139	322	0.97552		-0.01363	-0.01516	-0.00468	-0.02252	-0.00665		-0.03938	-1	0.03938	165	-165		-0.02887	-1	0.02887	-165		0.02624	1	0.02624	165		-0.04149	-1	0.04149	-165		0.02807	1	0.02807	165
cd00473	118.686	60767	512	91	1.04	95	0.96795	791	0.92914	621	0.91653	487	0.9566	985	0.87411	889	0.94882		0.03881	0.05142	0.01135	0.09384	0.01913		0.03983	1	0.03983	166	166		-0.029	-1	0.029	-166		0.0268	1	0.0268	166		0.04214	1	0.04214	166		0.02829	1	0.02829	166
cd00475	261.873	175717	671	219	1.34	227	0.95429	2105	0.93267	1457	0.93432	1603	0.94936	2178	0.95098	2675	0.94375		0.02162	0.01997	0.00493	0.00331	0.01054		-0.03985	-1	0.03985	167	-167		-0.02914	-1	0.02914	-167		-0.02746	-1	0.02746	-167		-0.04365	-1	0.04365	-167		0.02844	1	0.02844	167
cd00483	236.346	24580	104	128	1.31	155	0.93935	1368	0.94572	1233	0.92414	1060	0.94831	1575	0.915	1460	0.90803		-0.00637	0.01521	-0.00896	0.02435	0.03132		0.04063	1	0.04063	168	168		-0.02917	-1	0.02917	-168		-0.02771	-1	0.02771	-168		0.04365	1	0.04365	168		0.02847	1	0.02847	168
cd00487	184.603	28798	156	140	1.24	157	0.88955	740	0.87079	574	0.91423	502	0.89655	793	0.85643	929	0.87416		0.01876	-0.02468	-0.007	0.03312	0.01539		-0.04272	-1	0.04272	169	-169		-0.02976	-1	0.02976	-169		0.02803	1	0.02803	169		0.04381	1	0.04381	169		-0.02856	-1	0.02856	-169
cd00488	114.327	12919	113	76	1.31	92	0.95192	493	0.96093	541	0.96622	471	0.96364	632	0.92271	590	0.96433		-0.00901	-0.0143	-0.01172	0.02921	-0.01241		-0.04304	-1	0.04304	170	-170		-0.03019	-1	0.03019	-170		-0.02803	-1	0.02803	-170		-0.04453	-1	0.04453	-170		-0.02878	-1	0.02878	-170
cd00495	200.636	89885	448	90	1.03	184	0.90634	790	0.87064	544	0.8571	545	0.89483	794	0.84345	926	0.88383		0.0357	0.04924	0.01151	0.06289	0.02251		-0.04346	-1	0.04346	171	-171		-0.03038	-1	0.03038	-171		0.02808	1	0.02808	171		0.04461	1	0.04461	171		0.0288	1	0.0288	171
cd00501	217.316	12387	57	195	1.21	188	0.70262	505	0.73593	484	0.73103	502	0.72782	551	0.74627	547	0.71819		-0.03331	-0.02841	-0.0252	-0.04365	-0.01557		-0.04347	-1	0.04347	172	-172		-0.03053	-1	0.03053	-172		-0.02844	-1	0.02844	-172		0.04489	1	0.04489	172		0.02994	1	0.02994	172
cd00504	1048.9	76570	73	156	1.34	175	0.76787	3904	0.85919	3770	0.68793	3645	0.84962	4140	0.76413	4074	0.89125		-0.09132	0.07994	-0.08175	0.00374	-0.12338		0.04378	1	0.04378	173	173		-0.03064	-1	0.03064	-173		-0.0287	-1	0.0287	-173		0.04492	1	0.04492	173		-0.03106	-1	0.03106	-173
cd00513	140.161	7849	56	107	1.59	116	0.97409	386	0.97999	391	0.97048	392	0.97694	432	0.9756	429	0.96946		-0.0059	0.00361	-0.00285	-0.00151	0.00463		-0.04389	-1	0.04389	174	-174		0.03128	1	0.03128	174		0.02876	1	0.02876	174		0.04516	1	0.04516	174		0.03132	1	0.03132	174
cd00516	366.989	68260	186	262	0.85	249	0.56828	1486	0.6619	1264	0.59745	1241	0.60206	1668	0.63713	2205	0.57229		-0.09362	-0.02917	-0.03378	-0.06885	-0.00401		-0.04407	-1	0.04407	175	-175		-0.03167	-1	0.03167	-175		-0.02915	-1	0.02915	-175		0.04576	1	0.04576	175		-0.03147	-1	0.03147	-175
cd00518	173.236	34474	199	140	0.85	143	0.85223	1374	0.79817	1271	0.84582	1245	0.8552	1387	0.76834	1395	0.83959		0.05406	0.00641	-0.00297	0.08389	0.01264		-0.04414	-1	0.04414	176	-176		-0.03235	-1	0.03235	-176		-0.02943	-1	0.02943	-176		0.04595	1	0.04595	176		0.03173	1	0.03173	176
cd00525	506.77	101354	200	182	0.72	189	0.43923	4947	0.33241	2912	0.32924	1951	0.24469	9088	0.3356	3834	0.32315		0.10682	0.10999	0.19454	0.10363	0.11608		-0.04506	-1	0.04506	177	-177		0.03262	1	0.03262	177		-0.02965	-1	0.02965	-177		-0.04719	-1	0.04719	-177		-0.03191	-1	0.03191	-177
cd00528	253.074	13666	54	136	1.56	146	0.98007	1370	0.98963	1343	0.97698	1331	0.98155	1530	0.96903	1692	0.96482		-0.00956	0.00309	-0.00148	0.01104	0.01525		0.04542	1	0.04542	178	178		0.03315	1	0.03315	178		-0.02973	-1	0.02973	-178		-0.04725	-1	0.04725	-178		0.03206	1	0.03206	178
cd00531	228.344	37220	163	127	0.58	115	0.37833	2796	0.34028	2090	0.28805	1451	0.36785	3829	0.37263	2127	0.33445		0.03805	0.09028	0.01048	0.0057	0.04388		-0.04574	-1	0.04574	179	-179		-0.03348	-1	0.03348	-179		0.03009	1	0.03009	179		-0.04742	-1	0.04742	-179		-0.03228	-1	0.03228	-179
cd00537	380.684	30074	79	274	1.04	260	0.74518	1244	0.80811	1285	0.78575	1206	0.78458	1517	0.75464	1442	0.74791		-0.06293	-0.04057	-0.0394	-0.00946	-0.00273		-0.04606	-1	0.04606	180	-180		-0.03361	-1	0.03361	-180		0.03158	1	0.03158	180		0.04758	1	0.04758	180		0.0326	1	0.0326	180
cd00538	667.534	38717	58	127	0.7	90	0.42942	3033	0.51439	3151	0.50758	2103	0.19021	6503	0.42548	3118	0.45416		-0.08497	-0.07816	0.23921	0.00394	-0.02474		0.0463	1	0.0463	181	181		-0.03375	-1	0.03375	-181		-0.03171	-1	0.03171	-181		0.0476	1	0.0476	181		0.03279	1	0.03279	181
cd00551	710.299	139929	197	363	0.56	333	0.39842	8712	0.37356	5615	0.44465	5555	0.36278	14482	0.34381	7289	0.36188		0.02486	-0.04623	0.03564	0.05461	0.03654		-0.04652	-1	0.04652	182	-182		-0.03378	-1	0.03378	-182		0.03179	1	0.03179	182		0.04838	1	0.04838	182		-0.03294	-1	0.03294	-182
cd00552	165.594	23680	143	91	1.05	99	0.93595	777	0.9301	660	0.91215	621	0.91495	1011	0.83181	1004	0.86493		0.00585	0.0238	0.021	0.10414	0.07102		-0.04675	-1	0.04675	183	-183		-0.03378	-1	0.03378	-183		0.0321	1	0.0321	183		-0.04929	-1	0.04929	-183		0.03379	1	0.03379	183
cd00554	231.426	26614	115	153	1.44	157	0.97029	856	0.95461	912	0.96903	818	0.95379	1047	0.93335	991	0.9685		0.01568	0.00126	0.0165	0.03694	0.00179		-0.0471	-1	0.0471	184	-184		-0.03387	-1	0.03387	-184		-0.03217	-1	0.03217	-184		0.04954	1	0.04954	184		0.03402	1	0.03402	184
cd00562	230.58	25825	112	102	0.85	107	0.84009	1373	0.79631	1332	0.84463	1201	0.78423	1754	0.75403	1345	0.78746		0.04378	-0.00454	0.05586	0.08606	0.05263		0.04714	1	0.04714	185	185		0.03474	1	0.03474	185		-0.03245	-1	0.03245	-185		0.04968	1	0.04968	185		0.03431	1	0.03431	185
cd00567	449.371	31456	70	370	0.87	368	0.71212	2002	0.75887	1627	0.77051	1807	0.72513	2451	0.70568	1859	0.7202		-0.04675	-0.05839	-0.01301	0.00644	-0.00808		-0.04821	-1	0.04821	186	-186		0.03477	1	0.03477	186		-0.03255	-1	0.03255	-186		0.05041	1	0.05041	186		-0.03475	-1	0.03475	-186
cd00568	574.053	76349	133	168	0.88	506	0.73917	2182	0.65594	2053	0.5925	1600	0.63073	4050	0.72763	2161	0.65133		0.08323	0.14667	0.10844	0.01154	0.08784		0.04823	1	0.04823	187	187		0.03615	1	0.03615	187		0.03279	1	0.03279	187		0.05166	1	0.05166	187		0.0348	1	0.0348	187
cd00569	192.107	48411	252	42	1.16	177	0.98493	1139	0.96393	855	0.95231	834	0.94974	1183	0.93525	1013	0.95664		0.021	0.03262	0.03519	0.04968	0.02829		-0.04841	-1	0.04841	188	-188		0.0367	1	0.0367	188		-0.03324	-1	0.03324	-188		0.05271	1	0.05271	188		0.03523	1	0.03523	188
cd00577	281.911	22271	79	249	0.89	247	0.77556	878	0.7666	799	0.71386	912	0.75166	1173	0.6896	950	0.75509		0.00896	0.0617	0.0239	0.08596	0.02047		0.04937	1	0.04937	189	189		0.03688	1	0.03688	189		-0.03343	-1	0.03343	-189		0.05304	1	0.05304	189		-0.03544	-1	0.03544	-189
cd00580	124.491	6598	53	113	1.17	113	0.91947	214	0.9775	215	0.95334	215	0.95202	230	0.92533	229	0.95422		-0.05803	-0.03387	-0.03255	-0.00586	-0.03475		0.04941	1	0.04941	190	190		-0.03697	-1	0.03697	-190		-0.03378	-1	0.03378	-190		0.05364	1	0.05364	190		0.03576	1	0.03576	190
cd00588	408.17	21633	53	135	0.87	129	0.69443	1671	0.75593	1512	0.79485	1394	0.70018	2453	0.70392	1605	0.67695		-0.0615	-0.10042	-0.00575	-0.00949	0.01748		-0.04977	-1	0.04977	191	-191		0.03731	1	0.03731	191		-0.03482	-1	0.03482	-191		0.05404	1	0.05404	191		0.03584	1	0.03584	191
cd00590	475.367	223898	471	72	0.72	86	0.41279	10925	0.12152	7010	0.1805	4632	0.22855	37831	0.15656	6804	0.22825		0.29127	0.23229	0.18424	0.25623	0.18454		0.04988	1	0.04988	192	192		-0.03855	-1	0.03855	-192		0.03519	1	0.03519	192		0.05461	1	0.05461	192		-0.03593	-1	0.03593	-192
cd00591	100.263	5715	57	85	1.19	89	0.97008	296	0.96387	300	0.94342	286	0.95745	315	0.93183	313	0.96285		0.00621	0.02666	0.01263	0.03825	0.00723		-0.05041	-1	0.05041	193	-193		-0.0387	-1	0.0387	-193		0.03547	1	0.03547	193		0.05493	1	0.05493	193		0.03606	1	0.03606	193
cd00593	644.52	127615	198	133	0.94	199	0.57639	5948	0.54719	5545	0.53095	3321	0.5687	9566	0.54381	6105	0.56997		0.0292	0.04544	0.00769	0.03258	0.00642		-0.05111	-1	0.05111	194	-194		-0.03872	-1	0.03872	-194		0.03564	1	0.03564	194		0.05501	1	0.05501	194		0.03613	1	0.03613	194
cd00594	540.86	69771	129	270	0.82	262	0.70516	4934	0.64849	4669	0.73535	4209	0.6841	6341	0.65152	5426	0.70192		0.05667	-0.03019	0.02106	0.05364	0.00324		-0.05121	-1	0.05121	195	-195		-0.03912	-1	0.03912	-195		0.03665	1	0.03665	195		0.05527	1	0.05527	195		0.03654	1	0.03654	195
cd00598	543.621	31530	58	325	0.75	244	0.48089	3288	0.54634	3075	0.56826	2407	0.48117	5981	0.42376	2694	0.4914		-0.06545	-0.08737	-0.00028	0.05713	-0.01051		-0.05241	-1	0.05241	196	-196		-0.04027	-1	0.04027	-196		0.0372	1	0.0372	196		0.05541	1	0.05541	196		-0.03661	-1	0.03661	-196
cd00618	209.216	21340	102	81	0.96	80	0.52562	1711	0.57962	1524	0.62757	1386	0.49759	2274	0.67333	1558	0.58888		-0.054	-0.10195	0.02803	-0.14771	-0.06326		-0.05264	-1	0.05264	197	-197		-0.04057	-1	0.04057	-197		-0.03771	-1	0.03771	-197		0.05713	1	0.05713	197		0.03684	1	0.03684	197
cd00633	140.945	7752	55	67	1.04	66	0.88857	1271	0.91736	1329	0.90177	1301	0.87437	1374	0.46482	1271	0.86504		-0.02879	-0.0132	0.0142	0.42375	0.02353		-0.05334	-1	0.05334	198	-198		0.04125	1	0.04125	198		0.03775	1	0.03775	198		0.05871	1	0.05871	198		0.03685	1	0.03685	198
cd00636	332.198	122249	368	148	0.5	230	0.47475	3171	0.39705	2038	0.3698	1472	0.38084	4325	0.44858	2531	0.37356		0.0777	0.10495	0.09391	0.02617	0.10119		-0.0535	-1	0.0535	199	-199		0.04226	1	0.04226	199		-0.03783	-1	0.03783	-199		0.05875	1	0.05875	199		0.03691	1	0.03691	199
cd00640	398.342	127071	319	289	0.81	292	0.75714	2479	0.68999	1980	0.76336	1921	0.68693	3329	0.67959	2826	0.72508		0.06715	-0.00622	0.07021	0.07755	0.03206		0.05353	1	0.05353	200	200		-0.04274	-1	0.04274	-200		0.03784	1	0.03784	200		0.05917	1	0.05917	200		-0.03698	-1	0.03698	-200
cd00641	345.518	38007	110	193	1.42	191	0.89037	1283	0.8865	1144	0.90695	1013	0.87567	1550	0.85433	1511	0.87497		0.00387	-0.01658	0.0147	0.03604	0.0154		-0.054	-1	0.054	201	-201		-0.04318	-1	0.04318	-201		-0.03813	-1	0.03813	-201		0.05927	1	0.05927	201		0.03769	1	0.03769	201
cd00651	281.3	19691	70	121	0.75	85	0.19121	1145	0.28915	1025	0.25902	1024	0.19173	1465	0.21924	1098	0.11124		-0.09794	-0.06781	-0.00052	-0.02803	0.07997		0.05406	1	0.05406	202	202		-0.04324	-1	0.04324	-202		-0.03866	-1	0.03866	-202		0.05932	1	0.05932	202		0.03822	1	0.03822	202
cd00652	237.587	14968	63	173	1.57	178	0.95817	837	0.96775	815	0.97113	754	0.96996	1159	0.93034	1017	0.95366		-0.00958	-0.01296	-0.01179	0.02783	0.00451		0.05502	1	0.05502	203	203		0.04396	1	0.04396	203		0.03891	1	0.03891	203		0.05945	1	0.05945	203		0.03891	1	0.03891	203
cd00653	1227.25	138679	113	1088	1.09	875	0.65266	7396	0.70791	5706	0.68115	5854	0.67814	8528	0.71548	8022	0.6609		-0.05525	-0.02849	-0.02548	-0.06282	-0.00824		0.0552	1	0.0552	204	204		-0.04431	-1	0.04431	-204		-0.03921	-1	0.03921	-204		-0.05945	-1	0.05945	-204		0.04026	1	0.04026	204
cd00657	219.88	29244	133	126	0.63	133	0.77238	1303	0.75956	1111	0.47717	814	0.7198	2439	0.564	1039	0.61538		0.01282	0.29521	0.05258	0.20838	0.157		-0.05525	-1	0.05525	205	-205		-0.04447	-1	0.04447	-205		-0.0394	-1	0.0394	-205		0.0604	1	0.0604	205		0.04124	1	0.04124	205
cd00677	475.056	84085	177	46	1.07	74	0.35993	4568	0.48112	4256	0.41653	4057	0.4615	6810	0.52842	4115	0.47512		-0.12119	-0.0566	-0.10157	-0.16849	-0.11519		0.05585	1	0.05585	206	206		-0.04479	-1	0.04479	-206		-0.03981	-1	0.03981	-206		-0.06078	-1	0.06078	-206		0.04153	1	0.04153	206
cd00688	1001.95	268522	268	302	0.66	228	0.19265	10531	0.25754	7725	0.30023	6705	0.18283	18575	0.35929	11577	0.25444		-0.06489	-0.10758	0.00982	-0.16664	-0.06179		0.05667	1	0.05667	207	207		0.04489	1	0.04489	207		-0.03984	-1	0.03984	-207		0.06105	1	0.06105	207		0.04153	1	0.04153	207
cd00719	270.317	16219	60	69	0.79	45	0.39527	2114	0.56812	1611	0.37923	1222	0.28896	3837	0.24393	1686	0.45508		-0.17285	0.01604	0.10631	0.15134	-0.05981		-0.05683	-1	0.05683	208	-208		-0.045	-1	0.045	-208		0.04051	1	0.04051	208		0.06135	1	0.06135	208		-0.0427	-1	0.0427	-208
cd00741	479.497	82953	173	152	0.67	161	0.36641	5848	0.40988	4097	0.46121	3538	0.40123	9325	0.47714	4145	0.39441		-0.04347	-0.0948	-0.03482	-0.11073	-0.028		0.05712	1	0.05712	209	209		0.04514	1	0.04514	209		-0.04086	-1	0.04086	-209		0.06267	1	0.06267	209		0.0429	1	0.0429	209
cd00756	172.124	24958	145	124	1.2	133	0.92943	1075	0.91258	786	0.90597	698	0.90453	1125	0.87902	964	0.92309		0.01685	0.02346	0.0249	0.05041	0.00634		-0.05736	-1	0.05736	210	-210		-0.04522	-1	0.04522	-210		0.04126	1	0.04126	210		-0.06282	-1	0.06282	-210		0.04293	1	0.04293	210
cd00761	394.431	114385	290	190	0.51	185	0.46558	6567	0.30206	4121	0.34805	2877	0.41932	15143	0.4592	3686	0.42982		0.16352	0.11753	0.04626	0.00638	0.03576		0.05752	1	0.05752	211	211		0.04544	1	0.04544	211		0.04182	1	0.04182	211		0.06289	1	0.06289	211		-0.04328	-1	0.04328	-211
cd00838	352.44	52866	150	199	0.44	143	0.3883	3340	0.24352	2628	0.36397	1449	0.29724	8389	0.31161	2100	0.32324		0.14478	0.02433	0.09106	0.07669	0.06506		-0.05786	-1	0.05786	212	-212		-0.04546	-1	0.04546	-212		0.04208	1	0.04208	212		0.06289	1	0.06289	212		0.04341	1	0.04341	212
cd00882	344.293	51644	150	160	0.66	151	0.60381	2960	0.48895	2162	0.55715	1871	0.46639	5078	0.49197	2007	0.43183		0.11486	0.04666	0.13742	0.11184	0.17198		0.05788	1	0.05788	213	213		-0.04603	-1	0.04603	-213		0.04218	1	0.04218	213		0.06331	1	0.06331	213		0.04362	1	0.04362	213
cd00945	266.271	31420	118	200	0.89	205	0.62707	1016	0.66212	886	0.58218	880	0.64448	1615	0.58218	990	0.61896		-0.03505	0.04489	-0.01741	0.04489	0.00811		-0.05803	-1	0.05803	214	-214		-0.04623	-1	0.04623	-214		-0.04225	-1	0.04225	-214		0.06331	1	0.06331	214		0.04388	1	0.04388	214
cd00985	215.425	38992	181	178	0.88	168	0.68547	1800	0.60163	1213	0.62503	1495	0.62905	1857	0.5853	1651	0.65145		0.08384	0.06044	0.05642	0.10017	0.03402		-0.05814	-1	0.05814	215	-215		-0.04659	-1	0.04659	-215		-0.04325	-1	0.04325	-215		0.06401	1	0.06401	215		0.04459	1	0.04459	215
cd00995	555.994	197378	355	464	0.72	487	0.73742	4152	0.6081	3140	0.65538	3092	0.68211	5434	0.71106	4253	0.67617		0.12932	0.08204	0.05531	0.02636	0.06125		0.05956	1	0.05956	216	216		0.04666	1	0.04666	216		0.04385	1	0.04385	216		0.06418	1	0.06418	216		-0.04467	-1	0.04467	-216
cd01037	262.6	26260	100	78	0.62	100	0.35001	3252	0.25037	2668	0.20931	2223	0.24057	4846	0.2153	2495	0.24492		0.09964	0.1407	0.10944	0.13471	0.10509		0.05957	1	0.05957	217	217		0.04742	1	0.04742	217		0.04402	1	0.04402	217		0.06457	1	0.06457	217		0.04478	1	0.04478	217
cd01066	379.495	39088	103	208	0.7	248	0.59846	1980	0.57206	1824	0.58451	1529	0.58103	2676	0.57514	1844	0.59834		0.0264	0.01395	0.01743	0.02332	0.00012		-0.05962	-1	0.05962	218	-218		0.04816	1	0.04816	218		-0.04414	-1	0.04414	-218		0.06521	1	0.06521	218		0.04492	1	0.04492	218
cd01081	323.983	18791	58	283	0.79	255	0.53783	954	0.58389	951	0.57161	884	0.53502	1305	0.4443	1050	0.51308		-0.04606	-0.03378	0.00281	0.09353	0.02475		-0.06079	-1	0.06079	219	-219		-0.04875	-1	0.04875	-219		-0.04425	-1	0.04425	-219		0.06587	1	0.06587	219		0.04495	1	0.04495	219
cd01291	483.551	47388	98	326	0.56	205	0.24126	2306	0.36398	1975	0.32335	1787	0.31526	3838	0.33675	2937	0.32423		-0.12272	-0.08209	-0.074	-0.09549	-0.08297		-0.06111	-1	0.06111	220	-220		0.04888	1	0.04888	220		-0.04558	-1	0.04558	-220		0.06656	1	0.06656	220		0.04556	1	0.04556	220
cd01292	485.902	24781	51	276	0.59	58	0.08654	2874	0.23502	2877	0.2503	2304	0.1773	5083	0.22142	2557	0.19552		-0.14848	-0.16376	-0.09076	-0.13488	-0.10898		0.06125	1	0.06125	221	221		0.04921	1	0.04921	221		0.04626	1	0.04626	221		-0.06734	-1	0.06734	-221		-0.04558	-1	0.04558	-221
cd01335	366.897	21280	58	204	0.51	84	0.16701	1435	0.3194	1248	0.32523	791	0.21971	4218	0.19174	909	0.26352		-0.15239	-0.15822	-0.0527	-0.02473	-0.09651		-0.0615	-1	0.0615	222	-222		0.04924	1	0.04924	222		-0.04794	-1	0.04794	-222		-0.06758	-1	0.06758	-222		0.04562	1	0.04562	222
cd01342	655.564	607708	927	83	0.62	312	0.55029	9402	0.48525	5606	0.30201	6356	0.41908	18223	0.57378	10844	0.4975		0.06504	0.24828	0.13121	-0.02349	0.05279		-0.06169	-1	0.06169	223	-223		-0.04954	-1	0.04954	-223		0.04907	1	0.04907	223		0.06783	1	0.06783	223		0.04645	1	0.04645	223
cd01391	479.295	61829	129	279	0.5	244	0.5006	3747	0.19185	3082	0.39038	2362	0.16098	5775	0.33221	3129	0.41317		0.30875	0.11022	0.33962	0.16839	0.08743		0.06229	1	0.06229	224	224		0.04959	1	0.04959	224		0.04944	1	0.04944	224		0.06785	1	0.06785	224		0.04686	1	0.04686	224
cd01392	339.942	459602	1352	52	1.12	316	0.83768	4359	0.88478	2334	0.88314	2196	0.91334	4054	0.93533	5240	0.89681		-0.0471	-0.04546	-0.07566	-0.09765	-0.05913		-0.06244	-1	0.06244	225	-225		0.04973	1	0.04973	225		0.05171	1	0.05171	225		-0.06819	-1	0.06819	-225		0.04704	1	0.04704	225
cd01425	266.953	45649	171	211	1.2	183	0.87114	1158	0.92225	921	0.93442	789	0.93236	1743	0.91833	1401	0.93453		-0.05111	-0.06328	-0.06122	-0.04719	-0.06339		-0.06293	-1	0.06293	226	-226		0.0498	1	0.0498	226		0.05241	1	0.05241	226		-0.06825	-1	0.06825	-226		0.0473	1	0.0473	226
cd01427	260.443	91676	352	201	0.54	146	0.54894	2713	0.5601	1826	0.45931	1965	0.42715	3866	0.55808	2055	0.4381		-0.01116	0.08963	0.12179	-0.00914	0.11084		-0.06305	-1	0.06305	227	-227		-0.05034	-1	0.05034	-227		0.05258	1	0.05258	227		0.0685	1	0.0685	227		0.0476	1	0.0476	227
cd01433	170.468	26593	156	112	1.16	130	0.78991	694	0.78166	514	0.79234	553	0.7692	815	0.80291	650	0.77771		0.00825	-0.00243	0.02071	-0.013	0.0122		0.06315	1	0.06315	228	228		0.05044	1	0.05044	228		-0.0527	-1	0.0527	-228		0.06856	1	0.06856	228		0.04953	1	0.04953	228
cd01514	718.906	259525	361	79	1.04	460	0.95132	5721	0.91785	4535	0.71767	5093	0.5175	6779	0.93184	5380	0.46972		0.03347	0.23365	0.43382	0.01948	0.4816		-0.06402	-1	0.06402	229	-229		-0.05108	-1	0.05108	-229		0.05367	1	0.05367	229		0.06878	1	0.06878	229		0.05115	1	0.05115	229
cd01594	492.191	203275	413	321	0.73	365	0.49979	2407	0.50382	1573	0.52005	2164	0.48537	2768	0.56804	3013	0.52323		-0.00403	-0.02026	0.01442	-0.06825	-0.02344		0.06481	1	0.06481	230	230		0.05142	1	0.05142	230		0.054	1	0.054	230		-0.06885	-1	0.06885	-230		0.0513	1	0.0513	230
cd01610	317.869	199304	627	120	0.6	149	0.72019	10049	0.42569	7359	0.59779	7983	0.51513	17337	0.65562	8123	0.46458		0.2945	0.1224	0.20506	0.06457	0.25561		-0.06489	-1	0.06489	231	-231		-0.0538	-1	0.0538	-231		0.05424	1	0.05424	231		0.06965	1	0.06965	231		0.05134	1	0.05134	231
cd01614	92.7286	6491	70	83	1.23	81	0.9213	190	0.94395	184	0.9317	184	0.93509	243	0.86629	206	0.91423		-0.02265	-0.0104	-0.01379	0.05501	0.00707		0.06504	1	0.06504	232	232		-0.05406	-1	0.05406	-232		-0.05438	-1	0.05438	-232		0.07058	1	0.07058	232		0.05176	1	0.05176	232
cd01635	430.234	40442	94	313	0.47	251	0.29039	2526	0.33613	2137	0.33539	2103	0.3093	5068	0.27036	1862	0.28639		-0.04574	-0.045	-0.01891	0.02003	0.004		-0.06545	-1	0.06545	233	-233		-0.05463	-1	0.05463	-233		0.05518	1	0.05518	233		0.07085	1	0.07085	233		0.05263	1	0.05263	233
cd01659	302.284	40506	134	69	0.48	0	0.001	3007	0.08595	2665	0.07935	1155	0.03073	6905	0.11995	1637	0.18983		-0.08495	-0.07835	-0.02973	-0.11895	-0.18883		0.06695	1	0.06695	234	234		0.05602	1	0.05602	234		0.05531	1	0.05531	234		0.07097	1	0.07097	234		0.05266	1	0.05266	234
cd01901	347.753	231951	667	163	0.63	179	0.44227	3009	0.47815	1905	0.39339	2178	0.39825	3736	0.42922	3721	0.43126		-0.03588	0.04888	0.04402	0.01305	0.01101		0.06715	1	0.06715	235	235		-0.05613	-1	0.05613	-235		0.0555	1	0.0555	235		0.07197	1	0.07197	235		0.05279	1	0.05279	235
cd01983	353.452	333305	943	174	0.47	185	0.4173	10881	0.28577	7657	0.23584	7900	0.31028	12503	0.38506	10136	0.29441		0.13153	0.18146	0.10702	0.03224	0.12289		-0.06752	-1	0.06752	236	-236		-0.0566	-1	0.0566	-236		0.05586	1	0.05586	236		0.07274	1	0.07274	236		0.05337	1	0.05337	236
cd02062	253.324	18746	74	158	0.86	157	0.73808	3468	0.55857	3277	0.79214	3102	0.7265	3645	0.70015	3393	0.7557		0.17951	-0.05406	0.01158	0.03793	-0.01762		0.06767	1	0.06767	237	237		0.05763	1	0.05763	237		0.056	1	0.056	237		0.07669	1	0.07669	237		0.05339	1	0.05339	237
cd02065	534.04	66755	125	125	0.83	109	0.42184	2967	0.50344	2727	0.56768	1699	0.45967	4940	0.50582	2566	0.56739		-0.0816	-0.14584	-0.03783	-0.08398	-0.14555		0.06802	1	0.06802	238	238		-0.0583	-1	0.0583	-238		0.05614	1	0.05614	238		0.07755	1	0.07755	238		-0.05383	-1	0.05383	-238
cd02116	462.894	752665	1626	60	0.54	83	0.47269	5533	0.22843	3229	0.17579	3732	0.13781	8996	0.26117	6452	0.2682		0.24426	0.2969	0.33488	0.21152	0.20449		0.0683	1	0.0683	239	239		-0.05839	-1	0.05839	-239		0.05629	1	0.05629	239		-0.07777	-1	0.07777	-239		-0.05415	-1	0.05415	-239
cd02153	554.82	89326	161	98	1.12	103	0.86967	2362	0.87387	2255	0.88552	1273	0.47542	2820	0.74662	2131	0.4678		-0.0042	-0.01585	0.39425	0.12305	0.40187		-0.0684	-1	0.0684	240	-240		0.05968	1	0.05968	240		0.05642	1	0.05642	240		0.07899	1	0.07899	240		0.05452	1	0.05452	240
cd02205	340.76	147549	433	113	0.6	116	0.53186	7039	0.21728	3847	0.31358	2117	0.2875	11658	0.24739	3606	0.40964		0.31458	0.21828	0.24436	0.28447	0.12222		0.06924	1	0.06924	241	241		0.05987	1	0.05987	241		0.05673	1	0.05673	241		-0.07929	-1	0.07929	-241		0.05479	1	0.05479	241
cd02257	902.932	279006	309	321	0.7	295	0.56771	14679	0.49234	12056	0.469	6188	0.42687	38544	0.35413	14778	0.43614		0.07537	0.09871	0.14084	0.21358	0.13157		0.06946	1	0.06946	242	242		0.06044	1	0.06044	242		0.05731	1	0.05731	242		0.08109	1	0.08109	242		0.05488	1	0.05488	242
cd02325	528.98	159752	302	60	0.84	61	0.72907	7106	0.42218	4941	0.28893	2563	0.21404	18877	0.50341	7405	0.48393		0.30689	0.44014	0.51503	0.22566	0.24514		0.06948	1	0.06948	243	243		0.06066	1	0.06066	243		0.05843	1	0.05843	243		0.08145	1	0.08145	243		-0.05514	-1	0.05514	-243
cd02407	156.456	8918	57	115	1.42	116	0.94098	475	0.93328	470	0.92325	417	0.94217	636	0.92073	529	0.91873		0.0077	0.01773	-0.00119	0.02025	0.02225		0.06995	1	0.06995	244	244		-0.06074	-1	0.06074	-244		-0.059	-1	0.059	-244		0.08171	1	0.08171	244		0.05591	1	0.05591	244
cd02409	284.825	76333	268	67	0.69	125	0.40785	1701	0.3949	1385	0.56274	1112	0.25827	2610	0.41285	1971	0.43002		0.01295	-0.15489	0.14958	-0.005	-0.02217		0.07013	1	0.07013	245	245		0.06096	1	0.06096	245		-0.0591	-1	0.0591	-245		0.08323	1	0.08323	245		0.05683	1	0.05683	245
cd02439	364.342	58659	161	315	1.1	277	0.62762	1769	0.78352	1657	0.85516	1731	0.84328	1776	0.82983	1929	0.8195		-0.1559	-0.22754	-0.21566	-0.20221	-0.19188		0.07056	1	0.07056	246	246		0.06165	1	0.06165	246		0.06111	1	0.06111	246		0.08389	1	0.08389	246		0.05688	1	0.05688	246
cd02440	370.214	38132	103	142	0.51	100	0.47839	5738	0.21674	6466	0.30458	4909	0.32672	11386	0.30908	5150	0.29902		0.26165	0.17381	0.15167	0.16931	0.17937		-0.07097	-1	0.07097	247	-247		0.0617	1	0.0617	247		-0.06122	-1	0.06122	-247		-0.08398	-1	0.08398	-247		0.05712	1	0.05712	247
cd02696	383.424	200531	523	174	1	175	0.85884	6282	0.73822	3958	0.77976	2478	0.83443	14200	0.58715	6179	0.79663		0.12062	0.07908	0.02441	0.27169	0.06221		0.07103	1	0.07103	248	248		0.06209	1	0.06209	248		0.0613	1	0.0613	248		0.08434	1	0.08434	248		0.05768	1	0.05768	248
cd02775	828.659	323177	390	101	0.74	574	0.71401	7043	0.62051	4882	0.66659	4008	0.65728	8902	0.65484	8327	0.69217		0.0935	0.04742	0.05673	0.05917	0.02184		0.07111	1	0.07111	249	249		0.06287	1	0.06287	249		0.06312	1	0.06312	249		0.08485	1	0.08485	249		0.05781	1	0.05781	249
cd02883	207.35	41470	200	123	0.64	110	0.58362	2780	0.35861	2318	0.47371	1981	0.5418	4384	0.39809	1860	0.49691		0.22501	0.10991	0.04182	0.18553	0.08671		0.07277	1	0.07277	250	250		-0.06328	-1	0.06328	-250		-0.06623	-1	0.06623	-250		0.08596	1	0.08596	250		0.05836	1	0.05836	250
cd03127	257.283	29073	113	90	0.83	194	0.72324	2854	0.65378	2803	0.71662	2534	0.71478	3091	0.62723	2953	0.67194		0.06946	0.00662	0.00846	0.09601	0.0513		-0.07292	-1	0.07292	251	-251		-0.06342	-1	0.06342	-251		0.06623	1	0.06623	251		0.08606	1	0.08606	251		-0.05913	-1	0.05913	-251
cd03128	377.622	652909	1729	92	0.49	145	0.57331	14006	0.24291	6524	0.14805	4224	0.19732	0	0.001	11775	0.38278		0.3304	0.42526	0.37599	0.57231	0.19053		0.0731	1	0.0731	252	252		0.06398	1	0.06398	252		0.06651	1	0.06651	252		0.08622	1	0.08622	252		-0.05981	-1	0.05981	-252
cd03174	483.123	475393	984	265	0.93	258	0.74007	4036	0.71592	2508	0.76361	2479	0.77778	5102	0.78749	5511	0.82994		0.02415	-0.02354	-0.03771	-0.04742	-0.08987		0.07463	1	0.07463	253	253		0.0642	1	0.0642	253		-0.06703	-1	0.06703	-253		0.08662	1	0.08662	253		0.06038	1	0.06038	253
cd03333	650.946	217416	334	251	0.95	457	0.71825	5747	0.76331	4955	0.78754	5343	0.68646	9096	0.70022	5641	0.75053		-0.04506	-0.06929	0.03179	0.01803	-0.03228		0.07471	1	0.07471	254	254		-0.06562	-1	0.06562	-254		-0.06736	-1	0.06736	-254		0.08754	1	0.08754	254		0.06041	1	0.06041	254
cd03440	261.528	482780	1846	100	0.45	106	0.60779	11104	0.23501	7622	0.26942	8755	0.03619	18234	0.42059	8513	0.30412		0.37278	0.33837	0.5716	0.1872	0.30367		0.07529	1	0.07529	255	255		-0.0662	-1	0.0662	-255		-0.06776	-1	0.06776	-255		0.08782	1	0.08782	255		-0.06065	-1	0.06065	-255
cd03467	273.353	41823	153	98	0.78	97	0.58438	2586	0.50522	2116	0.61047	1332	0.55562	4430	0.5202	1856	0.53946		0.07916	-0.02609	0.02876	0.06418	0.04492		0.07537	1	0.07537	256	256		0.0677	1	0.0677	256		0.06782	1	0.06782	256		0.08825	1	0.08825	256		-0.06066	-1	0.06066	-256
cd03493	154.792	50617	327	98	0.55	103	0.66416	976	0.3933	604	0.54587	658	0.49898	1101	0.67715	1095	0.59457		0.27086	0.11829	0.16518	-0.01299	0.06959		-0.0758	-1	0.0758	257	-257		-0.06771	-1	0.06771	-257		-0.06861	-1	0.06861	-257		0.08952	1	0.08952	257		0.0609	1	0.0609	257
cd03524	475.227	31365	66	75	0.62	0	0.001	2522	0.19469	2670	0.04418	1606	0.02505	6367	0.1122	2189	0.01583		-0.19369	-0.04318	-0.02405	-0.1112	-0.01483		0.07655	1	0.07655	258	258		-0.06781	-1	0.06781	-258		0.06973	1	0.06973	258		0.09185	1	0.09185	258		0.06124	1	0.06124	258
cd03587	388.083	60541	156	41	1.23	50	0.90253	2868	0.84751	2417	0.91973	1703	0.94237	5074	0.93412	2640	0.89726		0.05502	-0.0172	-0.03984	-0.03159	0.00527		-0.07663	-1	0.07663	259	-259		-0.06913	-1	0.06913	-259		0.07021	1	0.07021	259		0.09308	1	0.09308	259		0.06125	1	0.06125	259
cd04100	562.567	118139	210	87	1.04	407	0.86631	2995	0.85951	2261	0.84901	2042	0.88211	3683	0.75732	2851	0.82341		0.0068	0.0173	-0.0158	0.10899	0.0429		0.07709	1	0.07709	260	260		0.06926	1	0.06926	260		0.07023	1	0.07023	260		0.09323	1	0.09323	260		0.06137	1	0.06137	260
cd04301	220.602	209351	949	65	0.62	133	0.79714	7755	0.3755	4624	0.47533	4458	0.70155	17993	0.56819	3494	0.63952		0.42164	0.32181	0.09559	0.22895	0.15762		0.0777	1	0.0777	261	261		-0.06929	-1	0.06929	-261		-0.07082	-1	0.07082	-261		0.09353	1	0.09353	261		-0.06179	-1	0.06179	-261
cd04332	307.653	152288	495	136	0.75	143	0.77969	3226	0.76053	2451	0.75953	1878	0.68441	3582	0.7712	2526	0.74538		0.01916	0.02016	0.09528	0.00849	0.03431		0.07865	1	0.07865	262	262		-0.06931	-1	0.06931	-262		0.07131	1	0.07131	262		0.09358	1	0.09358	262		0.06221	1	0.06221	262
cd04369	911.724	254371	279	99	0.8	112	0.53615	13534	0.18773	33564	0.12344	7140	0.15622	48108	0.2793	12357	0.11828		0.34842	0.41271	0.37993	0.25685	0.41787		0.07916	1	0.07916	263	263		-0.06938	-1	0.06938	-263		-0.07158	-1	0.07158	-263		0.09369	1	0.09369	263		0.06283	1	0.06283	263
cd04371	820.57	158370	193	81	0.83	134	0.55826	7909	0.51196	6210	0.57911	3540	0.17011	16835	0.33771	7527	0.40114		0.0463	-0.02085	0.38815	0.22055	0.15712		-0.07922	-1	0.07922	264	-264		0.07097	1	0.07097	264		-0.074	-1	0.074	-264		0.09371	1	0.09371	264		0.06295	1	0.06295	264
cd04508	1203.99	420192	349	48	1	75	0.34108	9370	0.20217	7219	0.21028	5142	0.1556	29828	0.15639	9946	0.17334		0.13891	0.1308	0.18548	0.18469	0.16774		0.07942	1	0.07942	265	265		0.07179	1	0.07179	265		0.07481	1	0.07481	265		0.09384	1	0.09384	265		-0.06326	-1	0.06326	-265
cd04519	1143.03	86870	76	257	0.66	269	0.46022	7077	0.36387	6779	0.49075	3627	0.28837	19773	0.41184	6544	0.30874		0.09635	-0.03053	0.17185	0.04838	0.15148		-0.08086	-1	0.08086	266	-266		0.07202	1	0.07202	266		-0.07566	-1	0.07566	-266		0.09476	1	0.09476	266		-0.06339	-1	0.06339	-266
cd05188	389.805	77961	200	275	0.75	300	0.67903	6795	0.60432	4522	0.66631	4736	0.66476	6343	0.67949	4267	0.6295		0.07471	0.01272	0.01427	-0.00046	0.04953		-0.0816	-1	0.0816	267	-267		0.07264	1	0.07264	267		-0.07734	-1	0.07734	-267		-0.09549	-1	0.09549	-267		0.06372	1	0.06372	267
cd05466	299.712	105199	351	197	0.69	289	0.86903	1291	0.754	1052	0.79625	873	0.85507	1192	0.83677	1384	0.80862		0.11503	0.07278	0.01396	0.03226	0.06041		0.08259	1	0.08259	268	268		0.07278	1	0.07278	268		0.07993	1	0.07993	268		0.09577	1	0.09577	268		0.06406	1	0.06406	268
cd05709	368.014	152358	414	202	0.76	156	0.68327	5617	0.5196	2457	0.5009	2589	0.4908	7339	0.71664	5558	0.56788		0.16367	0.18237	0.19247	-0.03337	0.11539		-0.08261	-1	0.08261	269	-269		0.07282	1	0.07282	269		0.08118	1	0.08118	269		0.09601	1	0.09601	269		0.06478	1	0.06478	269
cd05819	688.013	110082	160	271	0.84	219	0.27675	8778	0.27451	5703	0.21609	3795	0.27975	19902	0.11492	5423	0.39882		0.00224	0.06066	-0.003	0.16183	-0.12207		-0.08281	-1	0.08281	270	-270		-0.07346	-1	0.07346	-270		0.08148	1	0.08148	270		0.09644	1	0.09644	270		0.06506	1	0.06506	270
cd05992	547.312	84286	154	81	0.79	76	0.68257	3905	0.38767	3321	0.21526	1764	0.26969	11065	0.46708	4718	0.28009		0.2949	0.46731	0.41288	0.21549	0.40248		0.08323	1	0.08323	271	271		-0.07391	-1	0.07391	-271		-0.08175	-1	0.08175	-271		0.09648	1	0.09648	271		0.06567	1	0.06567	271
cd06071	2133.4	149338	70	277	1.37	335	0.75136	11500	0.79121	12608	0.85829	5665	0.68824	36585	0.82913	8890	0.8065		-0.03985	-0.10693	0.06312	-0.07777	-0.05514		0.08353	1	0.08353	272	272		0.07502	1	0.07502	272		0.08253	1	0.08253	272		-0.09765	-1	0.09765	-272		-0.06657	-1	0.06657	-272
cd06093	587.464	121605	207	106	0.71	111	0.71319	6383	0.35539	5762	0.37315	2728	0.14768	21144	0.46327	7012	0.37015		0.3578	0.34004	0.56551	0.24992	0.34304		0.08384	1	0.08384	273	273		-0.07517	-1	0.07517	-273		0.08408	1	0.08408	273		0.09799	1	0.09799	273		0.06798	1	0.06798	273
cd06157	339.772	19367	57	166	0.8	209	0.73306	1044	0.79708	1036	0.80884	873	0.74053	1676	0.81235	1133	0.64566		-0.06402	-0.07578	-0.00747	-0.07929	0.0874		0.08411	1	0.08411	274	274		-0.07578	-1	0.07578	-274		-0.08491	-1	0.08491	-274		-0.09839	-1	0.09839	-274		0.06959	1	0.06959	274
cd06167	322.265	86367	268	151	0.57	137	0.59443	4589	0.4009	3712	0.42761	2181	0.34211	8541	0.40044	3620	0.46416		0.19353	0.16682	0.25232	0.19399	0.13027		-0.08495	-1	0.08495	275	-275		0.07711	1	0.07711	275		0.08588	1	0.08588	275		0.09856	1	0.09856	275		0.07102	1	0.07102	275
cd06171	256.712	18740	73	55	1.03	156	0.97082	1152	0.99191	1133	0.9597	1004	0.99509	1652	0.97749	1116	0.96055		-0.02109	0.01112	-0.02427	-0.00667	0.01027		-0.08497	-1	0.08497	276	-276		-0.07797	-1	0.07797	-276		-0.08667	-1	0.08667	-276		0.09984	1	0.09984	276		0.07142	1	0.07142	276
cd06174	474.433	209225	441	390	0.4	376	0.62911	4541	0.20619	2603	0.31705	1813	0.49346	10991	0.2982	2912	0.46738		0.42292	0.31206	0.13565	0.33091	0.16173		-0.08816	-1	0.08816	277	-277		-0.07816	-1	0.07816	-277		0.08806	1	0.08806	277		0.10017	1	0.10017	277		0.07158	1	0.07158	277
cd06222	484.917	40733	84	121	0.87	132	0.67027	3953	0.71441	3652	0.50681	2791	0.64979	7576	0.65584	3141	0.6169		-0.04414	0.16346	0.02048	0.01443	0.05337		-0.0889	-1	0.0889	278	-278		-0.07835	-1	0.07835	-278		0.08981	1	0.08981	278		0.10027	1	0.10027	278		0.07292	1	0.07292	278
cd06223	268.35	292502	1090	130	0.54	121	0.66877	7462	0.44589	4689	0.4859	4037	0.40897	9915	0.62282	7306	0.54406		0.22288	0.18287	0.2598	0.04595	0.12471		-0.08952	-1	0.08952	279	-279		0.07908	1	0.07908	279		-0.09076	-1	0.09076	-279		0.10052	1	0.10052	279		0.07351	1	0.07351	279
cd06224	1098.91	98902	90	122	0.75	360	0.4823	6478	0.50094	6313	0.29558	3011	0.58762	17479	0.45191	5312	0.39739		-0.01864	0.18672	-0.10532	0.03039	0.08491		0.09086	1	0.09086	280	280		-0.0795	-1	0.0795	-280		0.09106	1	0.09106	280		0.10126	1	0.10126	280		0.07441	1	0.07441	280
cd06225	597.078	122401	205	48	0.76	206	0.80708	4868	0.62894	4040	0.71804	3059	0.68245	11057	0.69035	4539	0.64877		0.17814	0.08904	0.12463	0.11673	0.15831		0.09087	1	0.09087	281	281		0.07994	1	0.07994	281		0.0919	1	0.0919	281		0.10157	1	0.10157	281		0.07446	1	0.07446	281
cd06257	407.604	62771	154	55	1.24	69	0.90364	4734	0.80201	4482	0.84077	3272	0.76469	10140	0.84493	4257	0.84528		0.10163	0.06287	0.13895	0.05871	0.05836		0.09112	1	0.09112	282	282		-0.08084	-1	0.08084	-282		0.09391	1	0.09391	282		0.10244	1	0.10244	282		0.07569	1	0.07569	282
cd06259	249.102	111847	449	151	0.75	146	0.70002	2789	0.64045	1722	0.69812	1550	0.66337	4423	0.65916	2850	0.7243		0.05957	0.0019	0.03665	0.04086	-0.02428		-0.09132	-1	0.09132	283	-283		0.08093	1	0.08093	283		0.09515	1	0.09515	283		0.10339	1	0.10339	283		0.07755	1	0.07755	283
cd06260	206.097	76256	370	155	0.67	174	0.70815	1505	0.57897	1307	0.65842	1127	0.59843	1789	0.55065	1813	0.62871		0.12918	0.04973	0.10972	0.1575	0.07944		0.09262	1	0.09262	284	284		0.08199	1	0.08199	284		0.09528	1	0.09528	284		0.10363	1	0.10363	284		0.07848	1	0.07848	284
cd06261	317.798	80403	253	191	0.51	218	0.60265	2812	0.49029	1768	0.5614	1372	0.46417	3607	0.44812	1982	0.57271		0.11236	0.04125	0.13848	0.15453	0.02994		-0.09269	-1	0.09269	285	-285		0.08204	1	0.08204	285		0.09559	1	0.09559	285		0.10363	1	0.10363	285		0.07944	1	0.07944	285
cd06445	172.34	65317	379	79	1.2	81	0.89611	2637	0.84091	1625	0.8761	1446	0.87499	2370	0.7552	2418	0.86351		0.0552	0.02001	0.02112	0.14091	0.0326		-0.09321	-1	0.09321	286	-286		-0.08209	-1	0.08209	-286		0.09562	1	0.09562	286		0.10414	1	0.10414	286		0.07997	1	0.07997	286
cd06462	223.036	177537	796	85	0.77	108	0.72119	5194	0.46766	2724	0.61241	1765	0.39699	8109	0.54435	3765	0.4245		0.25353	0.10878	0.3242	0.17684	0.29669		0.09339	1	0.09339	287	287		0.08214	1	0.08214	287		0.09712	1	0.09712	287		0.10492	1	0.10492	287		0.08262	1	0.08262	287
cd06534	513.397	34911	68	427	1.02	440	0.79585	1770	0.82374	1734	0.82297	1831	0.80393	2326	0.78593	2319	0.78536		-0.02789	-0.02712	-0.00808	0.00992	0.01049		0.0935	1	0.0935	288	288		-0.08256	-1	0.08256	-288		0.10071	1	0.10071	288		0.10567	1	0.10567	288		0.08288	1	0.08288	288
cd06550	331.241	26168	79	261	0.8	261	0.70405	952	0.77697	980	0.79049	970	0.78139	1119	0.7635	1259	0.70999		-0.07292	-0.08644	-0.07734	-0.05945	-0.00594		-0.09362	-1	0.09362	289	-289		0.0828	1	0.0828	289		-0.10157	-1	0.10157	-289		0.10639	1	0.10639	289		-0.08297	-1	0.08297	-289
cd06558	336.511	234548	697	195	0.78	245	0.83128	9945	0.65564	5018	0.72205	4733	0.80959	11333	0.74643	6063	0.72783		0.17564	0.10923	0.02169	0.08485	0.10345		0.09635	1	0.09635	290	290		0.08326	1	0.08326	290		-0.10245	-1	0.10245	-290		0.10648	1	0.10648	290		0.08456	1	0.08456	290
cd06559	252.377	30790	122	208	1.21	207	0.85847	1236	0.81133	1085	0.85593	1102	0.83671	1552	0.8262	1490	0.83195		0.04714	0.00254	0.02176	0.03227	0.02652		-0.09794	-1	0.09794	291	-291		0.08433	1	0.08433	291		0.10507	1	0.10507	291		0.10718	1	0.10718	291		0.08463	1	0.08463	291
cd06560	357.02	17851	50	166	0.77	281	0.6072	811	0.66456	717	0.63105	736	0.64701	985	0.58317	999	0.55268		-0.05736	-0.02385	-0.03981	0.02403	0.05452		-0.0994	-1	0.0994	292	-292		-0.08644	-1	0.08644	-292		0.10511	1	0.10511	292		0.10773	1	0.10773	292		0.08491	1	0.08491	292
cd06561	243.12	42546	175	198	0.76	199	0.64472	1229	0.65044	1165	0.68919	1131	0.6655	1492	0.61764	1506	0.63768		-0.00572	-0.04447	-0.02078	0.02708	0.00704		0.09964	1	0.09964	293	293		0.0865	1	0.0865	293		-0.10532	-1	0.10532	-293		0.10899	1	0.10899	293		0.08623	1	0.08623	293
cd06567	582.608	286643	492	334	0.66	324	0.51629	6662	0.44526	4377	0.50135	3994	0.44498	9810	0.53915	7609	0.50208		0.07103	0.01494	0.07131	-0.02286	0.01421		0.10152	1	0.10152	294	294		0.08676	1	0.08676	294		0.10631	1	0.10631	294		0.10958	1	0.10958	294		0.08668	1	0.08668	294
cd06571	398.213	78448	197	90	1.1	100	0.92988	1528	0.90131	1218	0.9269	941	0.87588	2129	0.78449	2040	0.92658		0.02857	0.00298	0.054	0.14539	0.0033		0.10163	1	0.10163	295	295		-0.08737	-1	0.08737	-295		0.10702	1	0.10702	295		0.10973	1	0.10973	295		0.08671	1	0.08671	295
cd06572	449.423	87188	194	390	1.35	417	0.93188	1414	0.93385	1256	0.93395	1209	0.93362	1397	0.93153	1651	0.93393		-0.00197	-0.00207	-0.00174	0.00035	-0.00205		-0.10451	-1	0.10451	296	-296		0.08784	1	0.08784	296		0.10844	1	0.10844	296		0.10991	1	0.10991	296		0.0874	1	0.0874	296
cd06578	327.454	136221	416	240	0.67	229	0.77229	4057	0.62628	2712	0.72833	2406	0.70256	3639	0.70373	3040	0.7175		0.14601	0.04396	0.06973	0.06856	0.05479		0.10565	1	0.10565	297	297		-0.08827	-1	0.08827	-297		0.10944	1	0.10944	297		-0.11073	-1	0.11073	-297		0.08743	1	0.08743	297
cd06583	357.452	103661	290	125	0.87	139	0.75686	6038	0.59996	4278	0.66595	2490	0.55529	14126	0.29502	4171	0.65048		0.1569	0.09091	0.20157	0.46184	0.10638		0.10682	1	0.10682	298	298		0.08904	1	0.08904	298		0.10972	1	0.10972	298		-0.1112	-1	0.1112	-298		0.08784	1	0.08784	298
cd06587	170.075	54424	320	113	0.62	112	0.63128	2204	0.46244	1138	0.55035	1271	0.51261	2762	0.52355	977	0.59237		0.16884	0.08093	0.11867	0.10773	0.03891		0.10814	1	0.10814	299	299		-0.08962	-1	0.08962	-299		0.11065	1	0.11065	299		0.11184	1	0.11184	299		-0.08956	-1	0.08956	-299
cd06660	333.381	383055	1149	286	0.84	254	0.81796	6014	0.73854	2992	0.76194	2893	0.60799	7123	0.75869	6450	0.78517		0.07942	0.05602	0.20997	0.05927	0.03279		0.1086	1	0.1086	300	300		0.08963	1	0.08963	300		0.11259	1	0.11259	300		0.11204	1	0.11204	300		-0.08987	-1	0.08987	-300
cd06661	202.281	45311	224	99	0.76	114	0.72986	3096	0.44756	1934	0.58892	1732	0.55301	4338	0.44126	1688	0.63045		0.2823	0.14094	0.17685	0.2886	0.09941		0.11236	1	0.11236	301	301		0.09028	1	0.09028	301		0.11341	1	0.11341	301		0.11366	1	0.11366	301		-0.09291	-1	0.09291	-301
cd06664	161.903	33514	207	122	1.05	116	0.79818	1479	0.79721	1344	0.8373	1383	0.82662	1673	0.82802	1594	0.82373		0.00097	-0.03912	-0.02844	-0.02984	-0.02555		0.11293	1	0.11293	302	302		0.09091	1	0.09091	302		0.11867	1	0.11867	302		0.11407	1	0.11407	302		0.09311	1	0.09311	302
cd06845	231.31	20124	87	144	0.88	150	0.72295	970	0.77416	1208	0.75209	888	0.73192	1853	0.72646	937	0.70559		-0.05121	-0.02914	-0.00897	-0.00351	0.01736		0.11486	1	0.11486	303	303		0.09445	1	0.09445	303		0.12166	1	0.12166	303		0.11636	1	0.11636	303		0.0939	1	0.0939	303
cd06911	292.681	40390	138	86	1.03	205	0.84185	1674	0.77383	1257	0.82577	1107	0.71658	2194	0.74201	1578	0.74795		0.06802	0.01608	0.12527	0.09984	0.0939		0.11489	1	0.11489	304	304		-0.0948	-1	0.0948	-304		0.12179	1	0.12179	304		0.11673	1	0.11673	304		-0.09651	-1	0.09651	-304
cd06916	456.136	26912	59	72	1.86	81	0.94494	3644	0.95386	3273	0.95235	2459	0.94086	5640	0.9384	3028	0.92273		-0.00892	-0.00741	0.00408	0.00654	0.02221		0.11503	1	0.11503	305	305		0.0964	1	0.0964	305		0.12463	1	0.12463	305		-0.11674	-1	0.11674	-305		0.09715	1	0.09715	305
cd06919	126.644	7472	59	111	1.62	116	0.96267	227	0.97815	224	0.97981	218	0.97772	257	0.94307	334	0.96901		-0.01548	-0.01714	-0.01505	0.0196	-0.00634		0.11649	1	0.11649	306	306		0.09647	1	0.09647	306		0.12527	1	0.12527	306		-0.11895	-1	0.11895	-306		0.09941	1	0.09941	306
cd06920	742.571	77970	105	117	0.8	193	0.174	3845	0.15982	3069	0.15953	2299	0.15108	7147	0.11111	3346	0.13816		0.01418	0.01447	0.02292	0.06289	0.03584		-0.11741	-1	0.11741	307	-307		0.098	1	0.098	307		0.12553	1	0.12553	307		0.1209	1	0.1209	307		0.10093	1	0.10093	307
cd06971	173.756	29191	168	143	1.02	144	0.77335	1258	0.7121	946	0.77677	1211	0.75141	1331	0.76229	1297	0.68872		0.06125	-0.00342	0.02194	0.01106	0.08463		0.11868	1	0.11868	308	308		0.09871	1	0.09871	308		0.12577	1	0.12577	308		0.12305	1	0.12305	308		0.10117	1	0.10117	308
cd06974	349.249	61817	177	163	0.9	145	0.45442	2718	0.52282	2378	0.52062	1622	0.49363	4993	0.33086	2858	0.48589		-0.0684	-0.0662	-0.03921	0.12356	-0.03147		0.11924	1	0.11924	309	309		-0.09884	-1	0.09884	-309		0.13121	1	0.13121	309		0.12356	1	0.12356	309		0.10119	1	0.10119	309
cd07025	324.564	66211	204	281	0.94	281	0.81321	1018	0.78611	804	0.8131	779	0.79695	1120	0.82015	1271	0.78477		0.0271	0.00011	0.01626	-0.00694	0.02844		0.11927	1	0.11927	310	310		0.099	1	0.099	310		-0.13265	-1	0.13265	-310		0.125	1	0.125	310		0.10131	1	0.10131	310
cd07026	125.133	13139	105	106	1.4	110	0.97689	423	0.98545	426	0.98852	410	0.98106	449	0.98623	499	0.98574		-0.00856	-0.01163	-0.00417	-0.00934	-0.00885		-0.12032	-1	0.12032	311	-311		0.10016	1	0.10016	311		0.13383	1	0.13383	311		0.12559	1	0.12559	311		0.10252	1	0.10252	311
cd07040	332.627	141699	426	205	0.6	178	0.57102	5714	0.45178	3644	0.47202	3477	0.44936	7174	0.41315	4768	0.36321		0.11924	0.099	0.12166	0.15787	0.20781		0.12062	1	0.12062	312	312		0.10018	1	0.10018	312		0.13444	1	0.13444	312		0.12912	1	0.12912	312		0.10306	1	0.10306	312
cd07066	1413.91	189464	134	118	0.94	111	0.33819	10088	0.32072	10889	0.30504	8168	0.28578	18779	0.22861	8552	0.33525		0.01747	0.03315	0.05241	0.10958	0.00294		-0.12119	-1	0.12119	313	-313		-0.10042	-1	0.10042	-313		0.13534	1	0.13534	313		0.1296	1	0.1296	313		0.10345	1	0.10345	313
cd07153	147.014	54395	370	116	0.95	125	0.87426	643	0.82485	467	0.87634	441	0.87183	672	0.80643	826	0.87171		0.04941	-0.00208	0.00243	0.06783	0.00255		-0.12272	-1	0.12272	314	-314		-0.10195	-1	0.10195	-314		0.13565	1	0.13565	314		0.13471	1	0.13471	314		0.10495	1	0.10495	314
cd07177	251.447	90018	358	104	0.59	118	0.67735	2986	0.57583	2302	0.6682	1782	0.5215	4122	0.48578	3389	0.65042		0.10152	0.00915	0.15585	0.19157	0.02693		-0.12451	-1	0.12451	315	-315		-0.10408	-1	0.10408	-315		0.13583	1	0.13583	315		-0.13488	-1	0.13488	-315		0.10509	1	0.10509	315
cd07185	355.553	372264	1047	106	0.94	125	0.86568	13554	0.71762	6386	0.79798	4722	0.79786	29257	0.77383	10005	0.8053		0.14806	0.0677	0.06782	0.09185	0.06038		0.12918	1	0.12918	316	316		0.10495	1	0.10495	316		0.13689	1	0.13689	316		0.13801	1	0.13801	316		0.10581	1	0.10581	316
cd07304	375.771	54111	144	344	1.39	340	0.91851	754	0.91665	682	0.94358	697	0.93358	924	0.93895	1057	0.92217		0.00186	-0.02507	-0.01507	-0.02044	-0.00366		0.12932	1	0.12932	317	317		-0.10561	-1	0.10561	-317		0.13742	1	0.13742	317		0.14091	1	0.14091	317		0.10638	1	0.10638	317
cd07307	603.79	37435	62	194	0.6	201	0.48894	3818	0.29727	3684	0.46089	2105	0.14794	10039	0.36804	3009	0.37273		0.19167	0.02805	0.341	0.1209	0.11621		0.13153	1	0.13153	318	318		-0.10693	-1	0.10693	-318		0.13837	1	0.13837	318		0.143	1	0.143	318		-0.10898	-1	0.10898	-318
cd07323	507.581	31470	62	75	1.28	88	0.88047	3001	0.91076	2887	0.87449	1907	0.40429	6181	0.84971	2559	0.84524		-0.03029	0.00598	0.47618	0.03076	0.03523		0.13157	1	0.13157	319	319		-0.10695	-1	0.10695	-319		0.13848	1	0.13848	319		0.143	1	0.143	319		0.11084	1	0.11084	319
cd07377	284.978	118551	416	66	1.03	212	0.97017	2085	0.90322	1606	0.96421	1008	0.96489	3145	0.86044	1841	0.94643		0.06695	0.00596	0.00528	0.10973	0.02374		0.13176	1	0.13176	320	320		-0.10758	-1	0.10758	-320		0.13895	1	0.13895	320		0.14385	1	0.14385	320		0.11399	1	0.11399	320
cd07440	488.931	28358	58	113	0.89	123	0.6191	2838	0.52648	2808	0.52263	1890	0.46883	4818	0.52602	2340	0.48215		0.09262	0.09647	0.15027	0.09308	0.13695		-0.13233	-1	0.13233	321	-321		0.10878	1	0.10878	321		0.13922	1	0.13922	321		0.14396	1	0.14396	321		-0.11519	-1	0.11519	-321
cd07557	197.642	57909	293	91	1.01	122	0.88717	3543	0.81254	2033	0.85102	2092	0.82986	3500	0.84225	2199	0.85544		0.07463	0.03615	0.05731	0.04492	0.03173		0.13423	1	0.13423	322	322		-0.10918	-1	0.10918	-322		0.14084	1	0.14084	322		0.14403	1	0.14403	322		0.11539	1	0.11539	322
cd07765	548.298	62506	114	40	1.27	84	0.71537	4638	0.69397	3303	0.60413	2766	0.3605	9442	0.47435	3442	0.34586		0.0214	0.11124	0.35487	0.24102	0.36951		0.13557	1	0.13557	323	323		0.10923	1	0.10923	323		-0.14125	-1	0.14125	-323		0.14539	1	0.14539	323		0.11608	1	0.11608	323
cd07812	184.684	36198	196	141	0.47	139	0.48308	1960	0.34633	1441	0.34782	1233	0.40315	2597	0.44742	1188	0.4115		0.13675	0.13526	0.07993	0.03566	0.07158		0.13674	1	0.13674	324	324		0.10991	1	0.10991	324		0.14958	1	0.14958	324		0.14609	1	0.14609	324		0.11621	1	0.11621	324
cd07828	220.042	15623	71	148	1.12	153	0.8324	1196	0.85	1116	0.82979	1324	0.7711	1464	0.74458	1443	0.70374		-0.0176	0.00261	0.0613	0.08782	0.12866		0.13675	1	0.13675	325	325		0.10999	1	0.10999	325		0.15027	1	0.15027	325		-0.14771	-1	0.14771	-325		0.11679	1	0.11679	325
cd07914	218.606	31042	142	191	1.56	192	0.97812	681	0.97218	633	0.97125	550	0.9787	809	0.94521	711	0.96775		0.00594	0.00687	-0.00058	0.03291	0.01037		0.13814	1	0.13814	326	326		0.11022	1	0.11022	326		0.15167	1	0.15167	326		0.14912	1	0.14912	326		0.11937	1	0.11937	326
cd07976	334.235	28410	85	316	0.75	176	0.40658	1709	0.45499	1599	0.45612	1411	0.42023	3712	0.41963	1992	0.40195		-0.04841	-0.04954	-0.01365	-0.01305	0.00463		0.13891	1	0.13891	327	327		0.11114	1	0.11114	327		0.15181	1	0.15181	327		0.15092	1	0.15092	327		-0.12207	-1	0.12207	-327
cd07980	321.15	25692	80	123	0.98	225	0.68448	928	0.83291	786	0.75965	781	0.72773	1381	0.67788	1378	0.68071		-0.14843	-0.07517	-0.04325	0.0066	0.00377		0.13997	1	0.13997	328	328		0.11124	1	0.11124	328		0.15265	1	0.15265	328		0.15134	1	0.15134	328		0.12222	1	0.12222	328
cd07995	241.026	64113	266	208	0.88	206	0.78815	1867	0.71891	1356	0.75687	1567	0.73265	2300	0.67824	1722	0.73476		0.06924	0.03128	0.0555	0.10991	0.05339		0.14478	1	0.14478	329	329		0.11287	1	0.11287	329		0.15585	1	0.15585	329		0.15197	1	0.15197	329		0.12289	1	0.12289	329
cd08010	359.597	24093	67	246	1.21	306	0.86773	859	0.90526	891	0.90628	741	0.85661	1061	0.8754	1243	0.85219		-0.03753	-0.03855	0.01112	-0.00767	0.01554		0.14601	1	0.14601	330	330		-0.11309	-1	0.11309	-330		0.16063	1	0.16063	330		0.15254	1	0.15254	330		0.12298	1	0.12298	330
cd08026	122.163	11972	98	102	1.1	106	0.94058	338	0.97031	283	0.97225	280	0.96509	300	0.96283	452	0.95522		-0.02973	-0.03167	-0.02451	-0.02225	-0.01464		0.14635	1	0.14635	331	331		-0.11442	-1	0.11442	-331		0.16518	1	0.16518	331		0.15327	1	0.15327	331		-0.12338	-1	0.12338	-331
cd08044	713.5	48518	68	133	1.05	463	0.85887	3460	0.87347	3305	0.85417	2984	0.85775	4922	0.88409	3559	0.86339		-0.0146	0.0047	0.00112	-0.02522	-0.00452		0.14789	1	0.14789	332	332		0.1156	1	0.1156	332		0.17185	1	0.17185	332		0.1533	1	0.1533	332		0.12471	1	0.12471	332
cd08048	234.1	11705	50	84	1.52	100	0.89581	957	0.92528	916	0.93608	776	0.91534	1386	0.92625	1001	0.89982		-0.02947	-0.04027	-0.01953	-0.03044	-0.00401		0.14806	1	0.14806	333	333		0.11753	1	0.11753	333		0.17685	1	0.17685	333		0.15343	1	0.15343	333		-0.12481	-1	0.12481	-333
cd08168	276.728	28503	103	87	0.97	83	0.43799	1670	0.3609	1552	0.36088	1072	0.39591	2373	0.18648	1223	0.18762		0.07709	0.07711	0.04208	0.25151	0.25037		0.14824	1	0.14824	334	334		0.11829	1	0.11829	334		0.17741	1	0.17741	334		0.15453	1	0.15453	334		0.12866	1	0.12866	334
cd08368	495.588	197244	398	53	1.08	113	0.33101	8891	0.26106	6804	0.23656	4654	0.22036	25514	0.16282	9204	0.27835		0.06995	0.09445	0.11065	0.16819	0.05266		-0.14843	-1	0.14843	335	-335		0.11874	1	0.11874	335		0.18424	1	0.18424	335		0.15571	1	0.15571	335		0.13027	1	0.13027	335
cd08768	472.77	28839	61	87	0.98	363	0.85607	1400	0.93868	1392	0.9252	1221	0.92765	1927	0.87961	1498	0.92264		-0.08261	-0.06913	-0.07158	-0.02354	-0.06657		-0.14848	-1	0.14848	336	-336		-0.11983	-1	0.11983	-336		0.18548	1	0.18548	336		0.1575	1	0.1575	336		0.13069	1	0.13069	336
cd08774	314.32	31432	100	225	1.29	229	0.88646	3037	0.8652	3006	0.91546	2889	0.90348	3521	0.87822	2941	0.87375		0.02126	-0.029	-0.01702	0.00824	0.01271		-0.15239	-1	0.15239	337	-337		0.1224	1	0.1224	337		0.1907	1	0.1907	337		0.15787	1	0.15787	337		0.13111	1	0.13111	337
cd09030	130.822	9550	73	102	0.93	121	0.75732	268	0.78041	245	0.77609	242	0.77919	324	0.67587	328	0.75446		-0.02309	-0.01877	-0.02187	0.08145	0.00286		0.15279	1	0.15279	338	338		0.12273	1	0.12273	338		0.19247	1	0.19247	338		0.16001	1	0.16001	338		0.13157	1	0.13157	338
cd09212	648.326	89469	138	96	0.71	82	0.56954	8428	0.37187	8449	0.56125	7037	0.21496	16972	0.47596	7721	0.46702		0.19767	0.00829	0.35458	0.09358	0.10252		0.15573	1	0.15573	339	339		0.12373	1	0.12373	339		0.19247	1	0.19247	339		-0.16129	-1	0.16129	-339		0.13629	1	0.13629	339
cd09233	1730.88	96929	56	356	1.04	713	0.72454	6527	0.73019	6776	0.82338	3997	0.79536	19016	0.68646	6663	0.67809		-0.00565	-0.09884	-0.07082	0.03808	0.04645		-0.1559	-1	0.1559	340	-340		0.12697	1	0.12697	340		0.19454	1	0.19454	340		0.16183	1	0.16183	340		0.13695	1	0.13695	340
cd09281	196.399	37905	193	123	1.21	119	0.81152	1450	0.82175	1222	0.87494	1089	0.85238	1625	0.85301	1751	0.84745		-0.01023	-0.06342	-0.04086	-0.04149	-0.03593		0.1569	1	0.1569	341	341		0.1308	1	0.1308	341		0.20157	1	0.20157	341		0.1645	1	0.1645	341		0.13778	1	0.13778	341
cd09294	155.133	30251	195	116	1.53	146	0.97482	280	0.96843	249	0.97301	243	0.96906	249	0.98067	457	0.96913		0.00639	0.00181	0.00576	-0.00585	0.00569		0.15797	1	0.15797	342	342		0.13526	1	0.13526	342		0.20203	1	0.20203	342		-0.16664	-1	0.16664	-342		0.1444	1	0.1444	342
cd09487	489.194	50387	103	56	0.88	60	0.71764	4083	0.5694	4247	0.7104	1894	0.31318	11551	0.64979	2752	0.55852		0.14824	0.00724	0.40446	0.06785	0.15912		-0.16082	-1	0.16082	343	-343		0.14051	1	0.14051	343		0.20506	1	0.20506	343		0.16819	1	0.16819	343		-0.14555	-1	0.14555	-343
cd09634	356.183	50578	142	318	0.94	299	0.81064	1571	0.82016	1380	0.86098	1279	0.82349	1694	0.79382	1636	0.80499		-0.00952	-0.05034	-0.01285	0.01682	0.00565		0.16226	1	0.16226	344	344		0.1407	1	0.1407	344		0.20997	1	0.20997	344		0.16839	1	0.16839	344		0.14753	1	0.14753	344
cd09652	257.393	15701	61	189	0.72	212	0.52576	597	0.56922	577	0.55438	518	0.52379	913	0.45518	705	0.43953		-0.04346	-0.02862	0.00197	0.07058	0.08623		0.16352	1	0.16352	345	345		0.14094	1	0.14094	345		0.21064	1	0.21064	345		-0.16849	-1	0.16849	-345		0.15039	1	0.15039	345
cd09693	238.976	30111	126	204	0.68	140	0.4086	815	0.42441	588	0.49822	516	0.47721	1366	0.47679	790	0.49816		-0.01581	-0.08962	-0.06861	-0.06819	-0.08956		0.16367	1	0.16367	346	346		0.14238	1	0.14238	346		0.21453	1	0.21453	346		0.16931	1	0.16931	346		0.15148	1	0.15148	346
cd09725	93.3471	11295	121	79	1.19	87	0.89225	196	0.8938	153	0.90097	149	0.88983	175	0.82375	207	0.86498		-0.00155	-0.00872	0.00242	0.0685	0.02727		0.16884	1	0.16884	347	347		0.14508	1	0.14508	347		-0.21566	-1	0.21566	-347		0.17684	1	0.17684	347		-0.1516	-1	0.1516	-347
cd09727	221.667	11305	51	210	1.06	192	0.72643	375	0.81964	370	0.78023	358	0.78543	520	0.66711	501	0.70393		-0.09321	-0.0538	-0.059	0.05932	0.0225		-0.17285	-1	0.17285	348	-348		-0.14584	-1	0.14584	-348		0.2175	1	0.2175	348		0.1773	1	0.1773	348		0.15334	1	0.15334	348
cd09731	187.983	11091	59	141	0.88	144	0.64686	382	0.72266	373	0.68064	353	0.67219	563	0.61056	455	0.67877		-0.0758	-0.03378	-0.02533	0.0363	-0.03191		0.17422	1	0.17422	349	349		0.14667	1	0.14667	349		-0.2232	-1	0.2232	-349		0.17891	1	0.17891	349		0.15486	1	0.15486	349
cd09804	365.073	20079	55	121	1.35	130	0.94382	1485	0.97478	1463	0.97031	1169	0.95126	3187	0.91413	1708	0.93961		-0.03096	-0.02649	-0.00744	0.02969	0.00421		0.17564	1	0.17564	350	350		0.15229	1	0.15229	350		0.22722	1	0.22722	350		-0.17954	-1	0.17954	-350		0.157	1	0.157	350
cd09916	164.932	12040	73	96	0.91	114	0.92288	402	0.9543	326	0.95086	284	0.95059	520	0.88327	374	0.92802		-0.03142	-0.02798	-0.02771	0.03961	-0.00514		0.17637	1	0.17637	351	351		-0.15489	-1	0.15489	-351		0.22889	1	0.22889	351		0.18469	1	0.18469	351		0.15712	1	0.15712	351
cd10146	290.326	65033	224	69	0.98	230	0.73097	2440	0.69114	1763	0.64771	1624	0.67254	3127	0.62458	2524	0.68944		0.03983	0.08326	0.05843	0.10639	0.04153		0.17814	1	0.17814	352	352		-0.15822	-1	0.15822	-352		0.23374	1	0.23374	352		0.18553	1	0.18553	352		0.15724	1	0.15724	352
cd10147	431.874	140791	326	145	0.63	383	0.75429	2541	0.60794	1554	0.65411	1526	0.66841	2953	0.64937	2704	0.6236		0.14635	0.10018	0.08588	0.10492	0.13069		-0.17891	-1	0.17891	353	-353		0.16346	1	0.16346	353		0.23921	1	0.23921	353		0.1872	1	0.1872	353		0.15728	1	0.15728	353
cd10148	99.0672	13275	134	80	1.16	84	0.90718	373	0.90916	338	0.8949	309	0.9212	467	0.84062	416	0.89757		-0.00198	0.01228	-0.01402	0.06656	0.00961		0.17951	1	0.17951	354	354		0.16354	1	0.16354	354		0.24274	1	0.24274	354		0.19157	1	0.19157	354		0.15733	1	0.15733	354
cd10315	1286.16	138905	108	100	0.96	676	0.28442	5250	0.30524	5251	0.32139	4291	0.28926	8627	0.17076	5416	0.29515		-0.02082	-0.03697	-0.00484	0.11366	-0.01073		0.18067	1	0.18067	355	355		-0.16376	-1	0.16376	-355		0.24436	1	0.24436	355		0.19321	1	0.19321	355		0.15762	1	0.15762	355
cd10316	632.903	39240	62	92	1.18	464	0.66353	2827	0.78804	2607	0.73291	2540	0.72263	3185	0.63575	2996	0.70911		-0.12451	-0.06938	-0.0591	0.02778	-0.04558		0.18327	1	0.18327	356	356		0.16682	1	0.16682	356		0.24734	1	0.24734	356		0.19399	1	0.19399	356		0.15831	1	0.15831	356
cd10719	394.607	147583	374	65	1.25	329	0.8768	4637	0.86051	4012	0.8934	3712	0.89393	5638	0.92405	5320	0.88129		0.01629	-0.0166	-0.01713	-0.04725	-0.00449		0.18508	1	0.18508	357	357		0.16987	1	0.16987	357		0.24752	1	0.24752	357		-0.20221	-1	0.20221	-357		0.15887	1	0.15887	357
cd10747	395.8	172569	436	222	1.08	332	0.8658	4776	0.84415	4071	0.8686	4055	0.82689	5898	0.86579	5493	0.84586		0.02165	-0.0028	0.03891	1e-05	0.01994		0.18691	1	0.18691	358	358		-0.17063	-1	0.17063	-358		0.25232	1	0.25232	358		0.20601	1	0.20601	358		0.15912	1	0.15912	358
cd11296	631.21	63121	100	338	0.53	235	0.43488	6293	0.32923	5741	0.46526	3366	0.28307	12425	0.40016	4394	0.31551		0.10565	-0.03038	0.15181	0.03472	0.11937		0.18905	1	0.18905	359	359		0.17381	1	0.17381	359		0.25373	1	0.25373	359		0.20838	1	0.20838	359		0.15959	1	0.15959	359
cd11308	822.733	61705	75	76	1.38	377	0.59213	3769	0.61758	3457	0.42859	2597	0.55666	5470	0.48874	3340	0.556		-0.02545	0.16354	0.03547	0.10339	0.03613		0.19167	1	0.19167	360	360		0.17903	1	0.17903	360		0.25907	1	0.25907	360		0.20911	1	0.20911	360		0.16173	1	0.16173	360
cd11375	274.699	28294	103	173	1	168	0.72117	1818	0.69801	1559	0.72464	1456	0.72729	2272	0.6502	1840	0.71816		0.02316	-0.00347	-0.00612	0.07097	0.00301		0.19353	1	0.19353	361	361		0.18146	1	0.18146	361		0.2598	1	0.2598	361		0.21035	1	0.21035	361		0.16758	1	0.16758	361
cd11377	748.2	52374	70	138	0.91	467	0.78887	3261	0.82158	3162	0.81728	2789	0.80316	5417	0.82854	3659	0.75203		-0.03271	-0.02841	-0.01429	-0.03967	0.03684		-0.19369	-1	0.19369	362	-362		0.18237	1	0.18237	362		0.26136	1	0.26136	362		0.21152	1	0.21152	362		0.16774	1	0.16774	362
cd11378	215.408	16371	76	113	0.99	125	0.81948	1627	0.86925	1176	0.6744	1515	0.8223	2211	0.71585	1703	0.8297		-0.04977	0.14508	-0.00282	0.10363	-0.01022		0.19638	1	0.19638	363	363		0.18287	1	0.18287	363		0.26738	1	0.26738	363		0.21358	1	0.21358	363		0.17198	1	0.17198	363
cd11380	210.309	28602	136	138	1.48	119	0.73175	739	0.78216	732	0.83736	710	0.77969	787	0.83014	808	0.77445		-0.05041	-0.10561	-0.04794	-0.09839	-0.0427		0.19767	1	0.19767	364	364		0.18672	1	0.18672	364		0.27637	1	0.27637	364		0.21375	1	0.21375	364		0.17242	1	0.17242	364
cd11572	396.008	94250	238	99	1.09	388	0.90133	1120	0.86309	1032	0.88509	986	0.88748	1198	0.83612	1474	0.86009		0.03824	0.01624	0.01385	0.06521	0.04124		0.20003	1	0.20003	365	365		0.18846	1	0.18846	365		0.27679	1	0.27679	365		0.21549	1	0.21549	365		0.1781	1	0.1781	365
cd11586	77.35	4641	60	54	0.87	59	0.9004	352	0.97137	285	0.96602	290	0.94465	330	0.96774	352	0.8528		-0.07097	-0.06562	-0.04425	-0.06734	0.0476		0.20236	1	0.20236	366	366		0.19073	1	0.19073	366		0.27714	1	0.27714	366		0.21936	1	0.21936	366		0.17937	1	0.17937	366
cd11655	696.786	48775	70	57	1.16	136	0.21777	3104	0.39668	3500	0.32695	1880	0.28553	8265	0.44029	3039	0.36937		-0.17891	-0.10918	-0.06776	-0.22252	-0.1516		0.21625	1	0.21625	367	367		0.19372	1	0.19372	367		0.28226	1	0.28226	367		0.22055	1	0.22055	367		0.18271	1	0.18271	367
cd11660	419.916	39892	95	50	1.41	52	0.8564	3579	0.67132	3597	0.82166	2395	0.58902	10356	0.85141	2806	0.77378		0.18508	0.03474	0.26738	0.00499	0.08262		0.21825	1	0.21825	368	368		0.20283	1	0.20283	368		0.28373	1	0.28373	368		-0.22252	-1	0.22252	-368		0.18454	1	0.18454	368
cd11684	1889.03	139788	74	392	0.93	406	0.72591	8154	0.75268	7260	0.81418	5510	0.76457	15338	0.79349	7684	0.65793		-0.02677	-0.08827	-0.03866	-0.06758	0.06798		0.21908	1	0.21908	369	369		0.21828	1	0.21828	369		0.28383	1	0.28383	369		0.22566	1	0.22566	369		0.18727	1	0.18727	369
cd11691	266.836	16277	61	107	0.84	204	0.34697	800	0.36703	768	0.33994	837	0.34701	962	0.29937	848	0.34856		-0.02006	0.00703	-4e-05	0.0476	-0.00159		0.21993	1	0.21993	370	370		0.21918	1	0.21918	370		-0.28779	-1	0.28779	-370		0.22895	1	0.22895	370		-0.18883	-1	0.18883	-370
cd11709	1688.43	168843	100	117	0.85	121	0.54337	14004	0.32429	22964	0.36434	8341	0.15507	42053	0.33426	10123	0.34815		0.21908	0.17903	0.3883	0.20911	0.19522		0.22288	1	0.22288	371	371		0.21927	1	0.21927	371		0.29884	1	0.29884	371		0.23003	1	0.23003	371		0.19053	1	0.19053	371
cd11740	163.108	82696	507	159	1.47	159	0.96667	307	0.95336	243	0.9548	257	0.96342	275	0.9511	362	0.94449		0.01331	0.01187	0.00325	0.01557	0.02218		0.22501	1	0.22501	372	372		0.22166	1	0.22166	372		0.30599	1	0.30599	372		0.23162	1	0.23162	372		0.19161	1	0.19161	372
cd12082	478.623	25367	53	422	0.68	419	0.65601	1079	0.67761	1000	0.66303	972	0.65111	2750	0.5003	1121	0.59477		-0.0216	-0.00702	0.0049	0.15571	0.06124		0.23381	1	0.23381	373	373		-0.22754	-1	0.22754	-373		0.31168	1	0.31168	373		0.23394	1	0.23394	373		-0.19188	-1	0.19188	-373
cd12144	552.69	32056	58	114	1.32	256	0.67799	1362	0.83881	1287	0.84862	1285	0.81064	1615	0.83928	1388	0.8028		-0.16082	-0.17063	-0.13265	-0.16129	-0.12481		0.23833	1	0.23833	374	374		0.23229	1	0.23229	374		0.31556	1	0.31556	374		0.24015	1	0.24015	374		0.19522	1	0.19522	374
cd12148	768.811	1667552	2169	409	0.38	453	0.54208	26236	0.23125	18858	0.19989	6540	0.15941	0	0.001	35536	0.38475		0.31083	0.34219	0.38267	0.54108	0.15733		0.23865	1	0.23865	375	375		0.23256	1	0.23256	375		0.31918	1	0.31918	375		0.24102	1	0.24102	375		0.20055	1	0.20055	375
cd12151	297.966	61679	207	282	0.96	269	0.83868	937	0.80553	774	0.86154	741	0.84544	1087	0.83595	1231	0.80988		0.03315	-0.02286	-0.00676	0.00273	0.0288		0.24426	1	0.24426	376	376		0.23364	1	0.23364	376		0.3242	1	0.3242	376		0.24943	1	0.24943	376		0.203	1	0.203	376
cd12152	146.54	48065	328	123	0.84	128	0.8493	2191	0.77275	2124	0.8126	2075	0.83627	2277	0.8088	2177	0.82147		0.07655	0.0367	0.01303	0.0405	0.02783		0.25353	1	0.25353	377	377		0.23365	1	0.23365	377		0.33488	1	0.33488	377		0.24992	1	0.24992	377		0.20449	1	0.20449	377
cd12208	155.775	12462	80	150	1.25	150	0.96497	285	0.97436	295	0.97575	315	0.97565	357	0.97202	325	0.9674		-0.00939	-0.01078	-0.01068	-0.00705	-0.00243		0.25901	1	0.25901	378	378		0.24828	1	0.24828	378		0.33962	1	0.33962	378		0.24997	1	0.24997	378		0.20781	1	0.20781	378
cd12212	153.875	8617	56	115	1.32	139	0.91426	324	0.93651	284	0.92656	298	0.94769	336	0.87459	341	0.92342		-0.02225	-0.0123	-0.03343	0.03967	-0.00916		0.26165	1	0.26165	379	379		0.2539	1	0.2539	379		0.341	1	0.341	379		0.25151	1	0.25151	379		0.21367	1	0.21367	379
cd12843	240.517	13950	58	106	1.08	229	0.82295	395	0.84224	407	0.82407	384	0.79932	562	0.76768	440	0.8126		-0.01929	-0.00112	0.02363	0.05527	0.01035		0.27054	1	0.27054	380	380		0.25449	1	0.25449	380		0.35458	1	0.35458	380		0.25419	1	0.25419	380		0.22021	1	0.22021	380
cd12870	94.8889	6832	72	66	1.02	74	0.79025	390	0.78768	372	0.78608	363	0.72374	385	0.76437	398	0.70357		0.00257	0.00417	0.06651	0.02588	0.08668		0.27086	1	0.27086	381	381		0.25907	1	0.25907	381		0.35487	1	0.35487	381		0.25623	1	0.25623	381		0.23515	1	0.23515	381
cd12927	150.827	23529	156	103	0.89	106	0.79119	968	0.76329	702	0.81754	719	0.77787	1114	0.72984	832	0.78985		0.0279	-0.02635	0.01332	0.06135	0.00134		0.2729	1	0.2729	382	382		0.26524	1	0.26524	382		0.35546	1	0.35546	382		0.25685	1	0.25685	382		0.23627	1	0.23627	382
cd12934	581.014	40671	70	37	1.31	52	0.94516	4742	0.91178	4359	0.83229	2427	0.42013	8859	0.92326	3904	0.7903		0.03338	0.11287	0.52503	0.0219	0.15486		0.27541	1	0.27541	383	383		-0.27378	-1	0.27378	-383		0.36822	1	0.36822	383		0.27069	1	0.27069	383		0.24432	1	0.24432	383
cd12935	645.586	45191	70	36	1.34	174	0.93444	2868	0.93109	2628	0.92969	1615	0.73241	6918	0.89079	3116	0.84133		0.00335	0.00475	0.20203	0.04365	0.09311		0.2823	1	0.2823	384	384		0.28413	1	0.28413	384		0.37599	1	0.37599	384		0.27169	1	0.27169	384		0.24514	1	0.24514	384
cd12962	1525.84	105283	69	95	1.37	554	0.20326	4805	0.29595	4866	0.264	3658	0.30571	6149	0.24024	5410	0.21792		-0.09269	-0.06074	-0.10245	-0.03698	-0.01466		-0.29107	-1	0.29107	385	-385		0.29521	1	0.29521	385		0.37993	1	0.37993	385		0.27673	1	0.27673	385		0.25037	1	0.25037	385
cd13394	660.37	35660	54	618	0.94	549	0.62545	1237	0.70826	1204	0.70629	1086	0.65038	1842	0.61154	1690	0.64293		-0.08281	-0.08084	-0.02493	0.01391	-0.01748		0.29127	1	0.29127	386	386		0.2969	1	0.2969	386		0.38267	1	0.38267	386		0.27777	1	0.27777	386		0.25348	1	0.25348	386
cd13433	1560.33	113904	73	54	1.52	838	0.90061	5571	0.88572	4949	0.9046	4710	0.88699	7733	0.89412	5667	0.88168		0.01489	-0.00399	0.01362	0.00649	0.01893		0.2945	1	0.2945	387	387		0.30358	1	0.30358	387		0.38297	1	0.38297	387		0.28447	1	0.28447	387		0.25561	1	0.25561	387
cd13777	431.09	52593	122	128	0.98	298	0.72502	3963	0.66714	3283	0.73667	3177	0.73961	4947	0.60002	3673	0.70577		0.05788	-0.01165	-0.01459	0.125	0.01925		0.2949	1	0.2949	388	388		0.31206	1	0.31206	388		0.38337	1	0.38337	388		0.2886	1	0.2886	388		0.27301	1	0.27301	388
cd13778	455.21	56446	124	155	0.84	319	0.64725	4410	0.6195	3964	0.63429	4045	0.65017	5840	0.57847	4615	0.65421		0.02775	0.01296	-0.00292	0.06878	-0.00696		0.30689	1	0.30689	389	389		0.32181	1	0.32181	389		0.38363	1	0.38363	389		0.29692	1	0.29692	389		0.28588	1	0.28588	389
cd13944	405.431	131765	325	275	1.2	277	0.9437	2152	0.92242	1829	0.89554	1818	0.92357	2780	0.88039	2738	0.91653		0.02128	0.04816	0.02013	0.06331	0.02717		0.30875	1	0.30875	390	390		0.33837	1	0.33837	390		0.38815	1	0.38815	390		0.30263	1	0.30263	390		0.29669	1	0.29669	390
cd14251	654.87	45186	69	370	1.21	373	0.77468	2402	0.82802	2229	0.83298	1948	0.80433	3540	0.79225	2712	0.78848		-0.05334	-0.0583	-0.02965	-0.01757	-0.0138		0.31083	1	0.31083	391	391		0.33924	1	0.33924	391		0.3883	1	0.3883	391		0.33091	1	0.33091	391		0.30367	1	0.30367	391
cd14262	237.495	23512	99	173	0.77	199	0.62978	650	0.6973	599	0.64851	554	0.63493	941	0.66367	775	0.65561		-0.06752	-0.01873	-0.00515	-0.03389	-0.02583		0.31458	1	0.31458	392	392		0.34004	1	0.34004	392		0.39425	1	0.39425	392		0.33673	1	0.33673	392		-0.31085	-1	0.31085	-392
cd14263	135.455	13681	101	106	1.12	115	0.9701	447	0.96246	385	0.98841	330	0.98562	450	0.96762	583	0.97405		0.00764	-0.01831	-0.01552	0.00248	-0.00395		0.3304	1	0.3304	393	393		0.34219	1	0.34219	393		0.40446	1	0.40446	393		0.34194	1	0.34194	393		-0.33585	-1	0.33585	-393
cd14438	356.654	18546	52	41	1.47	206	0.9485	1597	0.96224	1629	0.95271	1512	0.92271	1901	0.97449	1757	0.87095		-0.01374	-0.00421	0.02579	-0.02599	0.07755		0.33112	1	0.33112	394	394		0.36293	1	0.36293	394		0.40823	1	0.40823	394		0.36202	1	0.36202	394		0.34304	1	0.34304	394
cd14458	383.746	24176	63	105	1.25	196	0.86183	1601	0.91533	1664	0.86555	1456	0.85167	2929	0.84398	1847	0.84534		-0.0535	-0.00372	0.01016	0.01785	0.01649		0.33212	1	0.33212	395	395		0.39045	1	0.39045	395		0.41288	1	0.41288	395		0.36202	1	0.36202	395		0.35362	1	0.35362	395
cd14473	1150.88	356772	310	99	0.8	275	0.69287	16866	0.50596	17602	0.43897	8616	0.41573	41667	0.32207	16461	0.41986		0.18691	0.2539	0.27714	0.3708	0.27301		0.3441	1	0.3441	396	396		0.39075	1	0.39075	396		0.42814	1	0.42814	396		0.3708	1	0.3708	396		0.3686	1	0.3686	396
cd14660	369.825	35873	97	105	1.22	185	0.89732	1960	0.94139	1827	0.93602	1731	0.90361	3909	0.86587	2938	0.85254		-0.04407	-0.0387	-0.00629	0.03145	0.04478		0.34631	1	0.34631	397	397		0.40222	1	0.40222	397		0.43382	1	0.43382	397		0.37802	1	0.37802	397		0.36951	1	0.36951	397
cd14745	737.333	37604	51	329	1.31	510	0.83615	3010	0.88856	3013	0.86591	2789	0.85771	3727	0.81145	3235	0.83437		-0.05241	-0.02976	-0.02156	0.0247	0.00178		-0.34786	-1	0.34786	398	-398		0.41271	1	0.41271	398		0.45828	1	0.45828	398		0.40265	1	0.40265	398		0.37387	1	0.37387	398
cd14752	861.653	506652	588	203	0.53	598	0.53368	13797	0.46058	9786	0.49142	9022	0.45887	19935	0.47493	13532	0.49546		0.0731	0.04226	0.07481	0.05875	0.03822		0.34842	1	0.34842	399	399		0.42095	1	0.42095	399		0.47127	1	0.47127	399		0.40382	1	0.40382	399		0.38086	1	0.38086	399
cd14785	391.549	39938	102	371	1.09	361	0.79443	1075	0.81675	880	0.82678	906	0.82767	1329	0.7953	1103	0.82299		-0.02232	-0.03235	-0.03324	-0.00087	-0.02856		0.3578	1	0.3578	400	400		0.42368	1	0.42368	400		0.47293	1	0.47293	400		0.41513	1	0.41513	400		0.39861	1	0.39861	400
cd14798	871.782	88050	101	124	0.92	483	0.69865	4551	0.69683	3943	0.70318	3733	0.61612	5865	0.71326	4627	0.74193		0.00182	-0.00453	0.08253	-0.01461	-0.04328		0.37278	1	0.37278	401	401		0.42526	1	0.42526	401		0.47618	1	0.47618	401		0.42375	1	0.42375	401		0.40187	1	0.40187	401
cd14947	650.338	128767	198	113	1.05	116	0.74484	6346	0.70924	4783	0.73348	3789	0.68966	13231	0.71039	6452	0.71105		0.0356	0.01136	0.05518	0.03445	0.03379		0.41154	1	0.41154	402	402		0.43644	1	0.43644	402		0.51503	1	0.51503	402		0.46184	1	0.46184	402		0.40248	1	0.40248	402
cd14948	650.08	612375	942	83	0.74	254	0.43166	12347	0.19301	8892	0.23794	5331	0.17259	48722	0.15389	11944	0.26408		0.23865	0.19372	0.25907	0.27777	0.16758		0.4152	1	0.4152	403	403		0.44014	1	0.44014	403		0.51783	1	0.51783	403		-0.52045	-1	0.52045	-403		0.41107	1	0.41107	403
cd15457	272.136	213355	784	152	1.09	143	0.81162	8235	0.70302	4889	0.72948	4884	0.71091	15534	0.74831	6495	0.77682		0.1086	0.08214	0.10071	0.06331	0.0348		0.42164	1	0.42164	404	404		0.44525	1	0.44525	404		0.52503	1	0.52503	404		-0.71874	-1	0.71874	-404		0.41787	1	0.41787	404
cd15481	595.855	41114	69	195	0.96	423	0.75975	2143	0.80796	2156	0.83925	1980	0.7624	3331	0.76195	2574	0.74106		-0.04821	-0.0795	-0.00265	-0.0022	0.01869		0.42292	1	0.42292	405	405		0.46493	1	0.46493	405		0.56551	1	0.56551	405		0.0621872					0.44046	1	0.44046	405
cd15489	1432.48	282199	197	47	0.94	53	0.25717	16970	0.16631	36825	0.03799	8501	0.12334	50184	0.1039	13333	0.09989		0.09086	0.21918	0.13383	0.15327	0.15728		0.43113	1	0.43113	406	406		0.46731	1	0.46731	406		0.5716	1	0.5716	406							0.45607	1	0.45607	406
cd15802	1443.49	88053	61	74	1.43	490	0.81825	7123	0.86214	6629	0.8435	5630	0.84152	12868	0.83722	6247	0.84931		-0.04389	-0.02525	-0.02327	-0.01897	-0.03106		0.45533	1	0.45533	407	407		0.66818	1	0.66818	407		0.61252	1	0.61252	407							0.4816	1	0.4816	407
cd15832	299.275	15263	51	279	1.28	284	0.92758	443	0.95788	458	0.95256	451	0.95035	576	0.84435	585	0.93539		-0.0303	-0.02498	-0.02277	0.08323	-0.00781		0.52531	1	0.52531	408	408		-0.7277	-1	0.7277	-408		0.67888	1	0.67888	408							0.50925	1	0.50925	408
																									0.0446962					Z-score	0.0373662					0.0720326										0.0529151
																													28708	6.02249				20534					42302					55080					50982
																														p < 0.00001				Z-score	4.30771				Z-score	8.87429				Z-score	11.7267				Z-score
						The GISMO run in orange failed to find a conserve region							The MUSCLE red cell runs core dumped																	MAFFT				Clustal	p = 0.00001					p < 0.00001					p < 0.00001
																																								MUSCLE					DIALIGN
																																												After 3 weeks DIALIGN was still running on the 4 sets (yellow highlighted)
																																												These values were not included in the calculation above.
[truncated: 1 more columns]
