# Supplementary material for: Bayesian Top-Down Protein Sequence Alignment with Inferred Position-Specific Gap Penalties
Source: PLoS Comput Biol. 2016 May 18;12(5):e1004936. doi: 10.1371/journal.pcbi.1004936 (PMC4871425; doi:10.1371/journal.pcbi.1004936)
Supplement: S2 Charts — (XLSX) [file pcbi.1004936.s005.xlsx]

## Sheet: data
cdd_id	ave_len	nres	num_sq	cols	RE	GSM_cols	GISMO	MFT_cols	MAFFT	CLO_cols	CLUSTAL	MUS_cols	MUSCLE	DA_cols	Dialign	KA_cols	Kalign			inserts		ave-inserts		ave RE
cd00003	245.906	13033	53	234	1.51	237	0.97688	327	0.98386	315	0.97725	317	0.97447	328	0.9715	356	0.97378			11.906		22.9857		0.923832
cd00009	187.53	25129	134	150	0.61	118	0.45672	733	0.42233	693	0.38783	555	0.42286	1220	0.43404	719	0.4185			37.53
cd00010	83.6119	5602	67	63	0.99	79	0.81585	126	0.82591	143	0.8594	110	0.80869	161	0.74406	136	0.75824			20.6119
cd00012	352.272	44034	125	303	0.44	76	0.09639	1670	0.23003	1218	0.24537	894	0.23304	3498	0.21026	1338	0.20088			49.272
cd00014	127.074	6862	54	107	0.88	107	0.83822	183	0.86556	193	0.78329	173	0.82201	364	0.43185	195	0.71591			20.074
cd00015	202.25	12135	60	185	1.06	193	0.90736	232	0.9466	223	0.96014	219	0.94675	241	0.91447	232	0.93761			17.25
cd00020	144.782	11293	78	120	0.7	98	0.26937	443	0.42958	502	0.19831	244	0.72963	1128	0.07037	502	0.28881			24.782
cd00021	59.8036	3349	56	39	1.12	51	0.89554	68	0.93389	68	0.88815	67	0.95234	132	0.51316	87	0.90585			20.8036
cd00022	89.2154	5799	65	69	1.27	81	0.93942	127	0.96932	123	0.96117	120	0.95785	159	0.86065	131	0.94815			20.2154
cd00024	77.5656	9463	122	55	0.85	62	0.69595	261	0.66805	178	0.65101	172	0.75083	299	0.55926	174	0.67223			22.5656
cd00027	93.9448	13622	145	72	0.64	72	0.65611	340	0.57418	261	0.54542	226	0.67886	464	0.57703	204	0.67657			21.9448
cd00029	69.26	3463	50	50	1.01	59	0.90223	90	0.93548	88	0.91951	90	0.91462	111	0.86772	98	0.89559			19.26
cd00030	135.623	70931	523	102	0.65	101	0.68308	1920	0.42645	970	0.46846	839	0.5794	3186	0.55037	800	0.59075			33.623
cd00032	261.585	13864	53	244	1.26	234	0.84637	388	0.9022	372	0.91818	379	0.89601	475	0.85357	454	0.85611			17.585
cd00033	78.0694	22484	288	57	0.85	69	0.85397	349	0.69894	203	0.75882	155	0.78257	1131	0.1353	175	0.78627			21.0694
cd00037	139.467	118965	853	115	0.69	107	0.70255	1425	0.55074	757	0.5656	585	0.58028	2235	0.43838	871	0.63673			24.467
cd00038	134.73	39476	293	115	0.64	116	0.79796	441	0.71692	343	0.73211	254	0.83281	572	0.80515	296	0.83076			19.73
cd00041	134.105	39561	295	112	0.84	118	0.78845	739	0.66286	434	0.6609	377	0.79348	2223	0.51621	396	0.78658			22.105
cd00042	111.83	5927	53	101	1	84	0.62594	186	0.75368	202	0.67114	158	0.75535	287	0.59147	202	0.59274			10.83
cd00043	111.119	36558	329	89	0.67	102	0.87305	431	0.754	293	0.75654	287	0.69818	474	0.45422	338	0.76059			22.119
cd00046	183.432	42006	229	146	0.73	146	0.64015	641	0.56281	605	0.64349	523	0.60442	1062	0.60244	711	0.58268			37.432
cd00047	261.225	26645	102	231	1.21	230	0.87968	920	0.83417	756	0.83512	794	0.87966	1066	0.7982	897	0.85465			30.225
cd00048	85.1032	13191	155	68	0.89	70	0.79551	199	0.77556	159	0.75717	121	0.86094	263	0.60874	137	0.79208			17.1032
cd00051	82.7333	8687	105	63	0.97	66	0.91197	176	0.80644	219	0.56762	161	0.80599	317	0.62227	191	0.79324			19.7333
cd00052	86.7414	5031	58	67	1.17	83	0.91132	134	0.93155	113	0.94198	107	0.93962	171	0.90302	130	0.94193			19.7414
cd00053	57.2445	49402	863	35	0.93	47	0.79209	528	0.65472	261	0.69679	181	0.69332	981	0.4671	159	0.77651			22.2445
cd00054	60.0018	33781	563	40	1.06	50	0.839	343	0.769	249	0.42576	143	0.79643	700	0.43335	151	0.84072			20.0018
cd00055	71.934	22875	318	50	0.98	53	0.82142	273	0.82371	170	0.7965	198	0.82076	580	0.1499	180	0.80431			21.934
cd00056	180.823	25496	141	154	0.86	156	0.6794	448	0.70597	353	0.71721	352	0.71717	531	0.65589	415	0.69023			26.823
cd00060	125.81	17865	142	102	0.72	96	0.59979	511	0.49659	370	0.59269	315	0.6625	828	0.45869	352	0.62732			23.81
cd00063	113.78	84425	742	93	0.61	101	0.67762	853	0.4631	447	0.57466	330	0.56091	3326	0.17332	367	0.63903			20.78
cd00064	73.0438	11687	160	49	0.84	54	0.71521	321	0.60667	209	0.58883	167	0.7297	1257	0.07753	234	0.70229			24.0438
cd00065	76.2398	29886	392	52	0.84	53	0.84837	652	0.69695	391	0.77719	488	0.77342	1194	0.64975	432	0.78634			24.2398
cd00067	55.3782	6590	119	36	1.03	46	0.8983	130	0.88473	71	0.94647	74	0.93533	96	0.81653	87	0.92953			19.3782
cd00069	113.021	16275	144	95	1.3	98	0.8954	237	0.91268	194	0.85313	179	0.91067	222	0.78108	191	0.9355			18.021
cd00070	148.185	13633	92	127	1	127	0.86167	319	0.886	289	0.89088	273	0.88245	415	0.80591	352	0.85486			21.185
cd00073	107.127	7606	71	89	1.31	99	0.80882	138	0.85128	133	0.85749	123	0.88046	132	0.78023	159	0.84481			18.127
cd00075	130.506	63165	484	104	0.79	105	0.73109	546	0.66476	370	0.70093	395	0.7205	644	0.5747	448	0.70716			26.506
cd00077	166.573	41310	248	146	0.51	126	0.43795	755	0.36803	565	0.43224	387	0.46677	1130	0.35623	484	0.40808			20.573
cd00079	157.992	20697	131	131	0.82	124	0.67146	395	0.71071	304	0.62612	342	0.67397	608	0.57639	398	0.65139			26.992
cd00080	93.463	42993	460	71	0.88	83	0.58731	440	0.60492	295	0.58914	551	0.65807	520	0.52518	348	0.59123			22.463
cd00081	326.808	25491	78	311	0.55	130	0.36948	1194	0.48898	1042	0.40814	770	0.47252	2799	0.39743	1075	0.34047			15.808
cd00082	84.8901	39389	464	65	0.72	80	0.86427	303	0.74273	172	0.88193	145	0.87273	232	0.835	160	0.80065			19.8901
cd00083	80.3425	11730	146	60	0.81	71	0.85258	218	0.82228	154	0.89273	122	0.9584	299	0.71339	134	0.8964			20.3425
cd00084	85.1244	16429	193	66	0.92	79	0.91374	194	0.89752	162	0.93185	142	0.9318	230	0.9174	146	0.93499			19.1244
cd00085	77.6803	9477	122	58	0.77	53	0.6345	234	0.57109	170	0.60349	160	0.65197	266	0.59869	163	0.64653			19.6803
cd00086	79.1887	25182	318	59	0.91	67	0.94356	329	0.82495	235	0.89453	158	0.97707	240	0.89415	160	0.91638			20.1887
cd00087	234.793	13618	58	215	1.41	216	0.87029	370	0.913	331	0.93191	341	0.91559	480	0.85098	422	0.88223			19.793
cd00088	109.875	9669	88	97	0.78	87	0.70087	193	0.79702	215	0.72053	175	0.80054	254	0.66985	203	0.71511			12.875
cd00090	97.743	17496	179	77	0.71	77	0.70632	303	0.63295	206	0.6947	129	0.75089	312	0.62749	171	0.75931			20.743
cd00093	75.5215	42141	558	58	0.7	66	0.87726	457	0.71169	249	0.73736	149	0.86611	238	0.79941	150	0.84822			17.5215
cd00096	96.7132	177372	1834	72	0.54	83	0.60615	1145	0.46433	461	0.53849	472	0.42024	0	0.001	364	0.53095			24.7132
cd00101	107.174	14147	132	82	0.85	58	0.60587	322	0.61235	241	0.75273	216	0.61943	666	0.62058	267	0.60117			25.174
cd00102	111.831	15880	142	89	0.71	83	0.63795	425	0.54553	291	0.60196	211	0.54878	883	0.20387	247	0.58465			22.831
cd00104	60.6447	16556	273	41	1.04	44	0.84947	172	0.80176	136	0.76558	125	0.77791	154	0.72686	155	0.75988			19.6447
cd00105	86.3953	47863	554	64	0.76	74	0.84548	502	0.74992	260	0.77722	219	0.84124	435	0.59152	254	0.81037			22.3953
cd00107	50.5686	2579	51	33	1.04	33	0.84481	87	0.90389	93	0.7523	74	0.84479	118	0.80969	92	0.79071			17.5686
cd00109	70.4894	6626	94	54	1.24	56	0.94704	88	0.96995	87	0.96123	82	0.95883	156	0.94801	118	0.95365			16.4894
cd00110	176.719	20146	114	151	0.72	147	0.66521	574	0.58693	370	0.66159	344	0.68989	836	0.59774	442	0.65271			25.719
cd00111	63.48	3174	50	44	1.28	49	0.85597	111	0.93645	98	0.93305	90	0.93805	127	0.88437	132	0.85765			19.48
cd00112	56.4788	31967	566	35	1.17	53	0.92959	311	0.83134	169	0.82517	149	0.88873	473	0.58068	142	0.91477			21.4788
cd00115	150.11	10958	73	141	1.1	129	0.77765	215	0.83623	214	0.83326	217	0.84709	272	0.78528	282	0.80285			9.11
cd00117	98.75	7900	80	81	1.03	80	0.78052	142	0.8859	131	0.82909	125	0.8023	171	0.67146	152	0.78892			17.75
cd00118	63.9441	153402	2399	45	0.93	55	0.88163	526	0.75904	237	0.73453	364	0.63596	0	0.001	134	0.85603			18.9441
cd00119	133.431	6805	51	124	1.59	118	0.91263	167	0.94209	167	0.92791	173	0.91055	192	0.86147	192	0.91839			9.431
cd00121	148.507	52423	353	126	0.67	126	0.69673	739	0.53876	483	0.59984	455	0.54777	1065	0.4962	594	0.65837			22.507
cd00127	158.865	8261	52	139	1.14	142	0.84972	295	0.88979	287	0.85342	271	0.86092	367	0.81754	290	0.83654			19.865
cd00130	123.984	22813	184	103	0.41	99	0.46508	650	0.27983	398	0.37764	221	0.47277	850	0.4372	214	0.49155			20.984
cd00133	102.323	46557	455	85	0.66	88	0.73454	290	0.57552	224	0.62938	159	0.61463	244	0.48292	255	0.54613			17.323
cd00134	246.063	15502	63	219	0.81	218	0.6716	526	0.69509	497	0.64235	413	0.6427	737	0.64743	601	0.61872			27.063
cd00136	94.5735	6431	68	70	0.75	62	0.53007	222	0.65592	207	0.5378	187	0.68074	309	0.46907	239	0.59346			24.5735
cd00138	149.321	11647	78	119	0.63	93	0.43726	389	0.54889	348	0.52961	260	0.53437	820	0.28847	386	0.46778			30.321
cd00140	374.929	41992	112	365	0.98	361	0.90146	616	0.8937	601	0.89003	572	0.91394	720	0.85066	741	0.88534			9.929
cd00143	299.116	41278	138	257	0.82	230	0.69452	1353	0.64452	967	0.66466	980	0.7477	1793	0.61631	1223	0.65803			42.116
cd00146	101.31	7193	71	81	0.75	86	0.52632	196	0.53437	197	0.51668	151	0.55305	584	0.35509	174	0.52078			20.31
cd00156	130.987	40344	308	113	0.83	124	0.85655	389	0.7726	249	0.81565	230	0.85061	345	0.81551	361	0.81304			17.987
cd00158	110.112	34355	312	89	0.83	90	0.80278	572	0.68251	379	0.72936	332	0.76912	668	0.73276	338	0.78248			21.112
cd00159	193.63	35047	181	169	0.76	176	0.77553	799	0.65163	557	0.77341	394	0.76332	962	0.68426	607	0.7813			24.63
cd00160	204.478	13700	67	180	0.85	193	0.77071	273	0.83159	286	0.80328	266	0.79224	423	0.73147	306	0.78892			24.478
cd00161	142.181	14929	105	123	0.76	118	0.70353	378	0.61026	396	0.56906	281	0.63974	1121	0.2302	301	0.62194			19.181
cd00162	66.5198	36985	556	45	0.92	48	0.84649	387	0.65239	213	0.80869	195	0.75817	413	0.51682	187	0.767			21.5198
cd00164	84.6147	9223	109	65	0.86	79	0.73632	255	0.66789	180	0.73397	133	0.76081	383	0.71167	161	0.73283			19.6147
cd00165	91.6704	24476	267	74	0.72	61	0.71384	294	0.76665	220	0.73497	174	0.7392	311	0.69187	225	0.69633			17.6704
cd00167	67.462	11536	171	45	0.89	59	0.91525	233	0.82763	223	0.74601	158	0.9239	568	0.42753	178	0.87669			22.462
cd00170	181.1	19921	110	157	0.69	156	0.632	542	0.62439	442	0.64453	335	0.69333	555	0.58528	545	0.66565			24.1
cd00172	383.837	35313	92	364	0.96	356	0.83768	811	0.88855	781	0.85772	783	0.84679	990	0.78271	974	0.82856			19.837
cd00173	100.639	35425	352	78	0.75	82	0.69629	643	0.54154	437	0.53854	371	0.74216	717	0.58477	354	0.70894			22.639
cd00174	69.7524	36062	517	51	1.02	54	0.90182	365	0.75601	196	0.78617	172	0.85106	314	0.80379	166	0.88676			18.7524
cd00176	241.497	40813	169	213	0.54	231	0.7224	1039	0.56379	1132	0.14862	515	0.73148	4711	0.03666	817	0.52916			28.497
cd00178	186.75	9711	52	172	1.09	162	0.78242	266	0.86016	256	0.81641	268	0.7906	339	0.62717	342	0.7723			14.75
cd00179	170.114	11908	70	152	1.23	143	0.70113	215	0.8393	226	0.74539	198	0.8697	214	0.86647	221	0.81834			18.114
cd00181	149.918	9145	61	128	0.68	144	0.71447	200	0.77951	225	0.74308	196	0.79581	300	0.67362	221	0.72215			21.918
cd00185	108.57	12377	114	85	0.82	97	0.69684	425	0.66453	324	0.66287	269	0.72415	557	0.53839	372	0.70825			23.57
cd00186	463.317	29189	63	417	1.06	399	0.77356	1164	0.84032	1150	0.79007	1148	0.79139	1358	0.80926	1399	0.78359			46.317
cd00187	473.052	27437	58	444	1.46	433	0.78486	636	0.92486	573	0.92369	581	0.91942	689	0.87687	649	0.89012			29.052
cd00188	118.866	72627	611	83	0.55	85	0.56028	658	0.46256	457	0.45748	653	0.46235	1122	0.4733	465	0.55428			35.866
cd00190	246.787	43928	178	232	1.07	217	0.83263	713	0.79097	530	0.85388	513	0.8332	828	0.77366	765	0.78274			14.787
cd00191	84.4884	7266	86	66	1.12	68	0.79837	125	0.91805	124	0.88858	117	0.83625	335	0.65093	152	0.74645			18.4884
cd00195	162.62	11546	71	141	1.15	148	0.80851	336	0.82162	304	0.8066	308	0.82006	416	0.75284	350	0.81641			21.62
cd00196	88.535	55600	628	69	0.46	73	0.57535	466	0.35001	283	0.42893	316	0.41739	549	0.37226	296	0.48241			19.535
cd00198	189.934	31529	166	161	0.53	156	0.54066	741	0.38203	575	0.387	377	0.50146	1628	0.35147	465	0.51241			28.934
cd00200	324.791	29556	91	289	0.86	253	0.35068	1189	0.6273	1001	0.32096	1065	0.62208	2732	0.12534	1176	0.56688			35.791
cd00201	50.163	6772	135	31	1.16	31	0.88821	120	0.9157	58	0.95416	54	0.93335	98	0.84976	59	0.9378			19.163
cd00204	154.863	53118	343	126	0.67	135	0.64707	1834	0.27899	1080	0.15633	590	0.67215	3742	0.06141	743	0.35281			28.863
cd00205	207.427	21365	103	177	0.76	136	0.62588	545	0.67241	454	0.7272	410	0.66786	826	0.63807	500	0.56107			30.427
cd00207	101.066	19809	196	84	0.87	66	0.65535	363	0.64832	259	0.63634	297	0.68271	425	0.47808	339	0.63851			17.066
cd00209	175.016	22402	128	157	1.18	154	0.86186	493	0.78951	408	0.79076	392	0.83469	653	0.75511	576	0.8105			18.016
cd00211	152.455	16770	110	136	0.89	137	0.83952	241	0.8383	234	0.85051	216	0.83676	248	0.77601	269	0.82624			16.455
cd00212	91.9775	8186	89	78	1.14	80	0.81485	103	0.83378	110	0.8383	105	0.80317	116	0.80199	119	0.81707			13.9775
cd00213	98.4593	13292	135	88	1.2	88	0.90162	124	0.94926	142	0.93559	129	0.94687	132	0.92034	163	0.94448			10.4593
cd00222	112.361	13708	122	92	1.08	101	0.78151	279	0.7932	212	0.77838	195	0.83538	527	0.71639	250	0.81324			20.361
cd00229	224.17	42144	188	188	0.45	159	0.44633	1587	0.29058	1020	0.35599	668	0.41732	2749	0.37944	839	0.37763			36.17
cd00241	200.76	20879	104	159	0.41	107	0.20746	956	0.16893	773	0.22397	584	0.19293	1731	0.22391	622	0.11247			41.76
cd00253	213.5	16226	76	185	0.79	155	0.55898	490	0.59432	421	0.55351	342	0.54584	834	0.40695	517	0.5679			28.5
cd00267	269.468	50121	186	208	0.74	203	0.66235	2437	0.60875	2077	0.55525	1904	0.67258	4415	0.64362	2420	0.61213			61.468
cd00291	79.456	15335	193	69	0.95	70	0.89775	165	0.87602	116	0.88863	121	0.90558	124	0.82834	199	0.86943			10.456
cd00296	253.361	30910	122	219	0.98	214	0.67594	726	0.64789	610	0.72592	616	0.67429	1059	0.64707	784	0.6456			34.361
cd00298	102.636	117723	1147	85	0.71	86	0.82162	701	0.68152	379	0.66956	524	0.59076	775	0.70785	368	0.77241			17.636
cd00299	124.378	16791	135	100	0.52	91	0.54557	492	0.40365	312	0.50062	286	0.6611	598	0.4893	288	0.53617			24.378
cd00305	159.941	10876	68	144	1.21	138	0.70313	251	0.75205	250	0.75537	249	0.74821	328	0.71237	331	0.73612			15.941
cd00306	296.62	81274	274	233	0.6	222	0.52781	3199	0.39995	2281	0.42886	1542	0.49425	5329	0.50967	2503	0.46149			63.62
cd00316	436.974	67294	154	403	0.86	389	0.70257	910	0.71056	831	0.69857	809	0.73404	1071	0.73061	976	0.70256			33.974
cd00317	175.598	16155	92	146	1.09	139	0.73476	536	0.77575	486	0.7186	491	0.69258	737	0.6607	591	0.69747			29.598
cd00320	100.806	9879	98	93	1.21	91	0.92649	170	0.95726	160	0.93863	159	0.92851	216	0.86801	223	0.9214			7.806
cd00321	184.152	19336	105	159	1.18	158	0.868	381	0.87198	326	0.8787	317	0.87877	421	0.83796	435	0.87896			25.152
cd00322	264.908	23047	87	223	0.7	208	0.56634	854	0.64134	711	0.60363	677	0.60341	1279	0.54665	787	0.56047			41.908
cd00326	243.955	43180	177	227	1.07	202	0.77066	966	0.76572	756	0.72876	770	0.79051	1184	0.66537	955	0.77008			16.955
cd00329	133.447	39367	295	106	0.76	110	0.62459	414	0.56801	379	0.5756	315	0.59628	628	0.64152	405	0.4842			27.447
cd00336	130.414	17345	133	105	1.11	107	0.92556	248	0.91948	225	0.93084	226	0.93405	238	0.92779	249	0.9277			25.414
cd00338	156.194	28115	180	137	0.78	147	0.76376	365	0.71067	298	0.76181	270	0.78126	419	0.67485	313	0.75063			19.194
cd00347	239.824	61395	256	217	0.41	211	0.29966	621	0.2917	524	0.31157	495	0.29815	754	0.30382	680	0.29799			22.824
cd00349	146.848	20265	138	131	1.32	137	0.93151	267	0.92837	237	0.91478	213	0.90983	255	0.89358	248	0.92693			15.848
cd00350	51.5479	3763	73	36	1.38	35	0.93423	84	0.92898	74	0.94892	74	0.88003	97	0.91225	94	0.85637			15.5479
cd00351	243.214	17025	70	219	1.4	206	0.81118	424	0.86811	409	0.83637	419	0.82862	535	0.82132	475	0.82443			24.214
cd00352	259.644	165653	638	220	0.78	180	0.69366	1706	0.61444	991	0.67325	1131	0.60728	2197	0.59713	1707	0.63722			39.644
cd00355	66.069	11496	174	53	1.14	57	0.99137	80	0.99655	79	0.99509	81	0.99592	84	0.99055	87	0.94917			13.069
cd00361	246.167	14770	60	221	1.56	235	0.97197	336	0.98047	336	0.98013	347	0.96617	360	0.97477	346	0.97171			25.167
cd00367	91.7227	10915	119	77	1.08	86	0.94208	134	0.92988	121	0.93798	119	0.94161	148	0.92962	145	0.94276			14.7227
cd00368	517.652	181696	351	475	0.7	424	0.58334	2273	0.5845	1664	0.5736	1818	0.57999	3014	0.62856	2753	0.6112			42.652
cd00371	79.2453	8400	106	63	1.02	72	0.91946	116	0.9108	110	0.89362	97	0.90579	123	0.79662	101	0.9374			16.2453
cd00374	216.103	20962	97	195	0.96	173	0.61856	403	0.75553	403	0.71912	388	0.70255	618	0.64157	535	0.67003			21.103
cd00379	175.83	39386	224	155	0.82	152	0.73323	352	0.73776	359	0.79277	345	0.78714	405	0.74902	400	0.75321			20.83
cd00382	175.976	28860	164	159	0.99	150	0.76462	406	0.7709	303	0.80705	314	0.78887	570	0.74878	420	0.75189			16.976
cd00383	108.996	57114	524	94	1	99	0.9137	259	0.87502	193	0.90703	189	0.91003	205	0.90699	271	0.91014			14.996
cd00384	326.622	24170	74	314	1.75	317	0.97357	383	0.97749	372	0.98213	376	0.97685	404	0.97309	454	0.97246			12.622
cd00385	275.852	89652	325	243	0.56	218	0.49637	975	0.42951	825	0.40716	847	0.47487	1715	0.39661	913	0.49167			32.852
cd00386	202.288	34389	170	186	0.98	183	0.77797	586	0.77382	441	0.82456	484	0.81397	622	0.81682	567	0.81746			16.288
cd00387	134.86	17397	129	125	1.14	120	0.82316	277	0.84196	238	0.83045	254	0.83592	342	0.8264	377	0.82425			9.86
cd00392	128.421	17080	133	114	1.3	110	0.82181	210	0.83843	193	0.86015	186	0.91193	205	0.87281	234	0.86699			14.421
cd00397	192.221	31332	163	166	0.63	167	0.58895	830	0.4628	543	0.53257	410	0.60341	1446	0.46943	537	0.49343			26.221
cd00400	410.708	46410	113	385	0.83	390	0.79298	897	0.78085	752	0.79849	738	0.81336	948	0.82121	952	0.783			25.708
cd00403	228.38	48645	213	206	0.93	198	0.72183	479	0.71686	402	0.75644	436	0.73301	640	0.69061	560	0.71985			22.38
cd00412	181.209	16490	91	155	1.41	157	0.91684	233	0.9238	227	0.92669	228	0.92473	262	0.82108	288	0.90373			26.209
cd00413	251.593	21637	86	212	0.8	188	0.59053	675	0.65997	592	0.56793	554	0.57188	1040	0.50486	732	0.46657			39.593
cd00421	178.728	26273	147	152	1	127	0.69409	372	0.75685	327	0.75839	376	0.75041	523	0.68287	464	0.69804			26.728
cd00427	68.6264	11941	174	57	1.06	63	0.96672	111	0.98192	91	0.98788	95	0.94806	97	0.94594	107	0.94084			11.6264
cd00431	180.824	36888	204	162	0.81	147	0.78785	491	0.73626	398	0.7425	360	0.78745	610	0.77657	486	0.76845			18.824
cd00432	126.625	17221	136	103	1.05	105	0.79901	305	0.81146	285	0.77171	244	0.75455	368	0.83386	307	0.76106			23.625
cd00433	490.857	96208	196	469	1.05	440	0.78329	1171	0.76123	926	0.78894	919	0.78762	1482	0.74594	1496	0.76712			21.857
cd00446	151.901	22937	151	136	1.12	146	0.92792	219	0.93849	198	0.95099	193	0.95921	245	0.93879	252	0.93049			15.901
cd00448	126.281	107718	853	107	0.87	113	0.84963	715	0.71624	453	0.75852	586	0.73217	786	0.72086	653	0.72688			19.281
cd00449	283.358	26919	95	255	0.97	258	0.7707	508	0.8291	456	0.80159	441	0.77932	620	0.64719	533	0.77355			28.358
cd00462	186.344	28697	154	171	1.25	180	0.90662	344	0.88677	280	0.90919	280	0.91113	374	0.90332	412	0.9002			15.344
cd00466	148.367	13353	90	140	1.59	140	0.97985	199	0.98995	195	0.98412	198	0.98443	209	0.96344	334	0.97203			8.367
cd00472	64.1507	4683	73	54	1.59	62	0.97421	81	0.97806	81	0.98352	81	0.9721	83	0.99139	92	0.97677			10.1507
cd00473	100.438	51424	512	91	1.04	95	0.96712	239	0.93153	194	0.93381	184	0.95442	197	0.85797	276	0.94863			9.438
cd00475	237.733	159519	671	219	1.34	225	0.95006	752	0.93079	540	0.92526	595	0.94213	769	0.95192	855	0.94673			18.733
cd00483	145.894	15173	104	128	1.31	139	0.93896	253	0.94481	226	0.93443	227	0.94604	294	0.92107	290	0.92735			17.894
cd00487	160.128	24980	156	140	1.23	150	0.89668	301	0.8863	267	0.90364	285	0.88212	391	0.84585	353	0.87343			20.128
cd00488	90.5133	10228	113	76	1.3	81	0.95395	118	0.97294	122	0.96404	112	0.96256	131	0.92128	146	0.96058			14.5133
cd00495	104.935	47011	448	90	1.01	104	0.91742	252	0.87846	217	0.86882	183	0.90888	261	0.8385	236	0.9047			14.935
cd00501	212	12084	57	195	1.21	190	0.70031	471	0.74067	457	0.73625	481	0.72371	541	0.72765	525	0.72229			17
cd00504	171.247	12501	73	156	1.27	147	0.76977	259	0.88331	266	0.87714	268	0.86339	355	0.78193	270	0.84772			15.247
cd00513	123.875	6937	56	107	1.59	115	0.96617	142	0.97965	142	0.97002	141	0.98066	143	0.97222	145	0.97028			16.875
cd00516	315.263	58639	186	262	0.85	261	0.6337	956	0.64822	818	0.56925	907	0.66958	1092	0.64009	1101	0.67127			53.263
cd00518	156.131	31070	199	140	0.85	142	0.86327	359	0.79874	266	0.86161	291	0.8515	380	0.75019	395	0.84456			16.131
cd00525	228.09	45618	200	182	0.72	130	0.36424	815	0.45654	665	0.43745	553	0.42654	1136	0.4758	870	0.43348			46.09
cd00528	154.519	8344	54	136	1.54	142	0.96349	206	0.98487	198	0.9866	202	0.9822	222	0.96794	217	0.97276			18.519
cd00531	146.479	23876	163	127	0.57	114	0.4372	413	0.41532	367	0.44558	228	0.49803	631	0.30016	295	0.36237			19.479
cd00537	291.177	23003	79	274	1.04	254	0.75549	421	0.80708	406	0.79988	407	0.79694	472	0.75616	466	0.77996			17.177
cd00538	159.879	9273	58	127	0.69	102	0.47426	393	0.52555	358	0.52273	290	0.47244	569	0.45748	341	0.51758			32.879
cd00551	406.096	80001	197	363	0.56	270	0.38615	2252	0.3907	1693	0.45626	1233	0.40388	3937	0.45035	1989	0.39573			43.096
cd00552	105.545	15093	143	91	1.04	99	0.93724	161	0.93051	155	0.90938	161	0.91336	205	0.84232	186	0.89489			14.545
cd00554	163.93	18852	115	153	1.43	157	0.97026	230	0.97129	228	0.96698	225	0.97298	243	0.94852	320	0.96579			10.93
cd00562	118.384	13259	112	102	0.84	107	0.85107	248	0.73939	206	0.8649	212	0.77492	254	0.77857	233	0.84413			16.384
cd00567	389.1	27237	70	370	0.87	354	0.71486	644	0.7703	590	0.77123	570	0.74435	783	0.7339	741	0.72937			19.1
cd00568	192.662	25624	133	168	0.88	179	0.74885	594	0.70461	502	0.70368	456	0.76829	812	0.73848	538	0.73785			24.662
cd00569	58.9286	14850	252	42	1.14	55	0.98787	108	0.96489	96	0.98059	85	0.9793	97	0.96466	88	0.96026			16.9286
cd00577	267.772	21154	79	249	0.89	246	0.77136	621	0.77889	569	0.7297	585	0.75929	764	0.68937	655	0.76063			18.772
cd00580	121.17	6422	53	113	1.17	112	0.92046	162	0.97698	163	0.95368	161	0.97118	178	0.92667	169	0.94857			8.17
cd00588	152.792	8098	53	135	0.85	127	0.70849	220	0.78974	217	0.76459	215	0.78225	361	0.73529	234	0.73563			17.792
cd00590	92.1125	43385	471	72	0.69	78	0.78607	756	0.59837	472	0.54108	299	0.75511	829	0.67542	292	0.73547			20.1125
cd00591	94.8947	5409	57	85	1.19	89	0.96602	125	0.96511	126	0.94336	125	0.96307	137	0.93236	145	0.95794			9.8947
cd00593	166.909	33048	198	133	0.92	140	0.79333	749	0.77715	570	0.77651	648	0.81398	1163	0.75576	666	0.7818			33.909
cd00594	303.992	39215	129	270	0.81	255	0.7065	1080	0.71349	915	0.72237	1034	0.72134	1608	0.67862	1112	0.67438			33.992
cd00598	341.655	19816	58	325	0.75	245	0.53908	766	0.60395	695	0.62374	633	0.57834	1343	0.54353	777	0.55886			16.655
cd00618	102.176	10422	102	81	0.93	73	0.60024	278	0.61765	228	0.57456	228	0.69096	374	0.72358	265	0.64104			21.176
cd00633	81.0545	4458	55	67	1.03	65	0.95758	116	0.98836	106	0.96624	103	0.97395	173	0.67807	113	0.9629			14.0545
cd00636	175.625	64630	368	148	0.49	129	0.54754	834	0.39329	579	0.43688	452	0.40764	930	0.45394	505	0.44534			27.625
cd00640	320.846	102350	319	289	0.81	280	0.77331	791	0.72079	655	0.7526	686	0.71007	1138	0.66297	933	0.7108			31.846
cd00641	215.055	23656	110	193	1.41	191	0.87595	484	0.88051	433	0.88642	480	0.88963	594	0.86493	538	0.88289			22.055
cd00651	138.386	9687	70	121	0.74	102	0.29439	234	0.42173	243	0.41458	211	0.34235	601	0.22871	261	0.20479			17.386
cd00652	188.81	11895	63	173	1.56	181	0.95762	242	0.96771	244	0.97313	246	0.96979	342	0.9302	296	0.95944			15.81
cd00653	1170.66	132285	113	1088	1.09	868	0.65633	4690	0.71146	3628	0.69798	3714	0.68079	6260	0.71881	5587	0.66947			82.66
cd00657	149.383	19868	133	126	0.63	131	0.77151	374	0.71429	373	0.60934	220	0.80066	801	0.58675	306	0.70606			23.383
cd00677	63.226	11191	177	46	0.99	47	0.51074	80	0.77758	81	0.77688	72	0.9266	85	0.77851	88	0.77713			17.226
cd00688	387.351	103810	268	302	0.64	219	0.27558	2724	0.32242	2273	0.33185	1723	0.35015	5197	0.40803	2327	0.42017			85.351
cd00719	92.2333	5534	60	69	0.78	52	0.46048	261	0.60121	236	0.45572	185	0.59199	431	0.40446	220	0.52145			23.2333
cd00741	192.931	33377	173	152	0.66	115	0.39721	1098	0.45822	733	0.45635	651	0.49453	1537	0.50445	893	0.39828			40.931
cd00756	142.89	20719	145	124	1.2	131	0.93885	240	0.91026	232	0.90219	219	0.94286	231	0.87752	269	0.92563			18.89
cd00761	208.921	60587	290	190	0.51	140	0.4499	1497	0.36537	785	0.44946	508	0.47521	2333	0.48035	670	0.43746			18.921
cd00838	230.44	34566	150	199	0.44	143	0.43313	1514	0.28006	849	0.50108	882	0.35512	2964	0.36082	883	0.33735			31.44
cd00882	191.313	28697	150	160	0.66	155	0.58614	791	0.56366	604	0.57721	568	0.56344	1254	0.51561	641	0.49657			31.313
cd00945	230.797	27234	118	200	0.89	198	0.6383	561	0.68385	514	0.56387	454	0.66883	1025	0.5813	532	0.61449			30.797
cd00985	199.171	36050	181	178	0.88	166	0.59447	537	0.61425	459	0.60819	537	0.60786	691	0.63114	833	0.60568			21.171
cd00995	503.442	178722	355	464	0.72	461	0.74623	2796	0.62222	2107	0.64926	1728	0.71063	3402	0.71668	2736	0.66915			39.442
cd01037	104.79	10479	100	78	0.61	43	0.30166	424	0.3693	378	0.20632	277	0.40163	818	0.20795	284	0.2247			26.79
cd01066	236.553	24365	103	208	0.7	212	0.5979	768	0.58416	673	0.59296	567	0.63757	966	0.57662	666	0.59481			28.553
cd01081	302.19	17527	58	283	0.79	257	0.5347	510	0.58548	498	0.57333	465	0.54731	857	0.45632	577	0.50997			19.19
cd01291	350.082	34308	98	326	0.56	175	0.23964	1351	0.3983	1375	0.31344	1193	0.36769	1963	0.36049	1411	0.35072			24.082
cd01292	315.176	16074	51	276	0.59	67	0.08843	931	0.41852	784	0.24253	563	0.26088	2635	0.21933	694	0.15015			39.176
cd01335	240.31	13938	58	204	0.51	119	0.24701	677	0.36673	661	0.33914	463	0.30253	1665	0.25708	635	0.30109			36.31
cd01342	107.481	99635	927	83	0.61	96	0.71834	477	0.59072	289	0.69554	370	0.60944	544	0.66901	280	0.63267			24.481
cd01391	326.566	42127	129	279	0.5	244	0.4833	1330	0.28418	1011	0.378	687	0.37836	2634	0.3757	812	0.45431			47.566
cd01392	69.537	94014	1352	52	1.07	66	0.91637	284	0.88565	139	0.92275	131	0.91231	137	0.95107	142	0.88801			17.537
cd01425	213.924	36581	171	211	1.2	183	0.86737	418	0.92213	389	0.94504	376	0.92598	443	0.92126	445	0.91717			2.924
cd01427	221.619	78010	352	201	0.54	123	0.54747	1055	0.56426	759	0.47066	601	0.4218	2092	0.52285	765	0.44437			20.619
cd01433	135.538	21144	156	112	1.16	121	0.81569	332	0.74049	301	0.83506	300	0.78996	380	0.80528	341	0.78362			23.538
cd01514	100.061	36122	361	79	1.02	98	0.96367	212	0.94632	172	0.92947	161	0.94694	235	0.96165	184	0.94566			21.061
cd01594	348.789	144050	413	321	0.72	265	0.47339	687	0.50888	657	0.5262	699	0.51167	955	0.55028	833	0.52398			27.789
cd01610	146.303	91732	627	120	0.58	117	0.74833	1189	0.46764	628	0.63616	611	0.56724	1536	0.713	859	0.61088			26.303
cd01614	90.4429	6331	70	83	1.23	83	0.91304	144	0.94324	138	0.93171	139	0.92375	192	0.86629	164	0.91404			7.4429
cd01635	347.298	32646	94	313	0.47	239	0.31359	1194	0.34666	1012	0.34487	972	0.31258	3207	0.28291	1259	0.28959			34.298
cd01659	97.3134	13040	134	69	0.47	50	0.34618	567	0.22475	496	0.1853	384	0.24208	1070	0.29053	410	0.30375			28.3134
cd01901	217.93	145359	667	163	0.63	159	0.46206	1010	0.55259	885	0.36809	1095	0.50173	1526	0.42528	1052	0.44206			54.93
cd01983	212.025	199940	943	174	0.45	146	0.36579	1496	0.34901	748	0.34586	1136	0.33734	2251	0.413	1538	0.35592			38.025
cd02062	180.811	13380	74	158	0.86	149	0.75324	368	0.83761	330	0.81775	297	0.76383	571	0.70491	351	0.75423			22.811
cd02065	142.928	17866	125	125	0.81	111	0.54375	392	0.58904	304	0.621	284	0.57742	459	0.55964	334	0.61458			17.928
cd02116	80.222	130441	1626	60	0.54	71	0.7483	428	0.55784	285	0.56156	302	0.59922	333	0.58141	188	0.59508			20.222
cd02153	116.497	18756	161	98	1.09	103	0.88387	202	0.82971	170	0.87307	174	0.87613	209	0.71924	235	0.88032			18.497
cd02205	136.062	58915	433	113	0.59	114	0.73681	1266	0.50074	827	0.35648	329	0.70885	1849	0.3062	608	0.66579			23.062
cd02257	438.777	135582	309	321	0.69	285	0.57079	5669	0.51529	3530	0.49353	3219	0.55041	12002	0.53623	4987	0.50607			117.777
cd02325	80.1689	24211	302	60	0.81	66	0.75076	281	0.81117	253	0.77359	178	0.86418	286	0.64846	212	0.72965			20.1689
cd02407	123.158	7020	57	115	1.41	116	0.94613	192	0.93376	182	0.91994	185	0.91643	230	0.92094	229	0.92191			8.158
cd02409	87.8769	23551	268	67	0.68	69	0.61923	217	0.6454	191	0.59264	232	0.61053	367	0.44367	211	0.62939			20.8769
cd02439	334.522	53858	161	315	1.1	291	0.6934	535	0.80387	499	0.79875	535	0.83178	580	0.83138	613	0.8359			19.522
cd02440	173.165	17836	103	142	0.51	95	0.4723	1070	0.30527	704	0.38029	383	0.48219	1948	0.38195	478	0.39575			31.165
cd02696	207.635	108593	523	174	1	177	0.87703	984	0.79783	578	0.80401	539	0.83589	1137	0.78146	774	0.79076			33.635
cd02775	125.805	49064	390	101	0.74	108	0.72204	626	0.66346	390	0.64768	396	0.67578	622	0.65228	448	0.67874			24.805
cd02883	145.345	29069	200	123	0.64	107	0.61064	782	0.4026	430	0.48441	303	0.63144	1000	0.438	419	0.53582			22.345
cd03127	115.991	13107	113	90	0.79	100	0.72427	344	0.72356	275	0.70665	271	0.82132	473	0.63516	296	0.7361			25.991
cd03128	117.466	203099	1729	92	0.48	92	0.59229	1189	0.3802	697	0.39502	992	0.31935	0	0.001	801	0.4563			25.466
cd03174	287.627	283025	984	265	0.92	270	0.80498	781	0.78096	617	0.77677	768	0.75784	953	0.76445	957	0.77211			22.627
cd03333	279.605	93388	334	251	0.95	237	0.72359	620	0.77334	498	0.80291	527	0.73762	740	0.73467	659	0.73504			28.605
cd03440	126.559	233627	1846	100	0.44	104	0.7072	1281	0.43544	616	0.30998	1097	0.30848	0	0.001	753	0.36959			26.559
cd03467	118.765	18171	153	98	0.76	92	0.60656	374	0.59256	298	0.59277	278	0.63641	539	0.58876	330	0.60347			20.765
cd03493	114.89	37569	327	98	0.54	109	0.69199	440	0.59159	375	0.64616	339	0.57581	427	0.67536	445	0.45853			16.89
cd03524	114.985	7589	66	75	0.61	0	0.001	406	0.54007	366	0.32795	253	0.43481	718	0.25719	310	0.26426			39.985
cd03587	54.5192	8505	156	41	1.14	46	0.91018	93	0.91358	67	0.95108	64	0.92353	77	0.93719	87	0.88219			13.5192
cd04100	105.352	22124	210	87	1	97	0.87867	252	0.87324	207	0.89115	198	0.86021	262	0.82282	218	0.88493			18.352
cd04301	88.3772	83870	949	65	0.6	76	0.81623	981	0.49329	553	0.57203	672	0.47651	1412	0.61154	334	0.67034			23.3772
cd04332	154.929	76690	495	136	0.74	145	0.80386	365	0.77649	338	0.8163	368	0.75113	560	0.77021	528	0.7705			18.929
cd04369	123.323	34407	279	99	0.77	111	0.78173	585	0.66157	452	0.7107	395	0.7922	656	0.68586	379	0.76117			24.323
cd04371	104.984	20262	193	81	0.81	90	0.71087	392	0.6954	332	0.66442	314	0.73219	473	0.69723	298	0.76712			23.984
cd04508	67.6504	23610	349	48	0.96	61	0.90374	268	0.81481	144	0.86473	129	0.84837	188	0.76826	115	0.90621			19.6504
cd04519	285.974	21734	76	257	0.65	222	0.45921	1043	0.52285	1026	0.46709	781	0.54238	1886	0.42783	940	0.47138			28.974
cd05188	293.995	58799	200	275	0.74	254	0.66895	936	0.64658	739	0.67376	624	0.68234	1255	0.67636	875	0.64539			18.995
cd05466	214.222	75192	351	197	0.69	203	0.86303	853	0.73206	510	0.80766	343	0.86823	537	0.84444	423	0.83705			17.222
cd05709	283.614	117416	414	202	0.76	154	0.69407	2417	0.57122	1291	0.5444	1752	0.67885	3571	0.70135	2418	0.52764			81.614
cd05819	295.319	47251	160	271	0.83	180	0.21666	1201	0.57879	865	0.44113	794	0.68307	3496	0.16374	1028	0.66208			24.319
cd05992	101.468	15626	154	81	0.75	82	0.73727	239	0.73506	210	0.65748	221	0.69918	307	0.57138	254	0.76256			20.468
cd06071	291.443	20401	70	277	1.35	262	0.76806	497	0.83742	476	0.84624	501	0.82062	580	0.80366	612	0.80674			14.443
cd06093	128.889	26680	207	106	0.69	108	0.77312	528	0.61764	332	0.70187	287	0.75344	777	0.6161	305	0.77571			22.889
cd06157	190.93	10883	57	166	0.79	175	0.77722	280	0.80101	265	0.83402	241	0.78874	331	0.81258	295	0.75781			24.93
cd06167	184.802	49527	268	151	0.56	136	0.59046	791	0.51515	607	0.49954	532	0.55315	1446	0.45825	764	0.49449			33.802
cd06171	74.5205	5440	73	55	1.01	68	0.99504	91	0.99041	81	0.95621	81	0.95124	86	0.98044	83	0.96186			19.5205
cd06174	432.907	190912	441	390	0.39	369	0.62307	3371	0.2052	2131	0.32569	1385	0.47806	9252	0.29659	2043	0.47597			42.907
cd06222	145.905	12256	84	121	0.85	127	0.70176	272	0.70684	257	0.70556	237	0.69959	470	0.68286	293	0.60174			24.905
cd06223	156.882	171001	1090	130	0.54	133	0.67302	1225	0.51784	642	0.47402	874	0.47902	1480	0.62323	1006	0.60675			26.882
cd06224	152.333	13710	90	122	0.72	118	0.71333	494	0.74471	569	0.58841	444	0.71407	809	0.5622	506	0.65165			30.333
cd06225	68.7902	14102	205	48	0.75	68	0.88862	194	0.77314	137	0.79906	106	0.89082	175	0.84043	121	0.87219			20.7902
cd06257	74.487	11471	154	55	1.2	64	0.90149	182	0.88128	137	0.93671	134	0.91309	266	0.85728	167	0.90463			19.487
cd06259	172.915	77639	449	151	0.74	141	0.71788	862	0.67509	512	0.74004	425	0.70419	996	0.64953	670	0.72476			21.915
cd06260	174.941	64728	370	155	0.67	163	0.7059	593	0.61891	422	0.68129	417	0.6725	656	0.55406	576	0.648			19.941
cd06261	218.609	55308	253	191	0.51	191	0.65422	695	0.52618	435	0.6488	475	0.63065	853	0.6744	607	0.60438			27.609
cd06445	95.847	36326	379	79	1.18	82	0.89727	255	0.89693	183	0.87101	182	0.89341	207	0.76816	326	0.90135			16.847
cd06462	126.165	100427	796	85	0.76	94	0.73312	1422	0.54496	1009	0.62907	1051	0.58113	2294	0.50697	949	0.5377			41.165
cd06534	445.515	30295	68	427	1.02	427	0.80006	677	0.82642	620	0.82686	597	0.80701	886	0.78918	781	0.78685			18.515
cd06550	277.696	21938	79	261	0.8	252	0.7397	360	0.79886	351	0.82388	361	0.86942	441	0.7879	440	0.72172			16.696
cd06558	214.288	149359	697	195	0.77	204	0.85451	1116	0.71002	715	0.76684	728	0.81306	990	0.82138	1255	0.79462			19.288
cd06559	228.451	27871	122	208	1.21	209	0.85618	508	0.84937	426	0.83987	410	0.86689	578	0.82957	568	0.81853			20.451
cd06560	190.42	9521	50	166	0.75	162	0.58809	365	0.64456	347	0.67644	342	0.6688	517	0.60712	386	0.57263			24.42
cd06561	217.309	38029	175	198	0.76	187	0.66779	443	0.65552	401	0.7019	428	0.67487	608	0.60499	484	0.6498			19.309
cd06567	359.772	177008	492	334	0.66	305	0.53062	1738	0.5099	1232	0.50698	1419	0.50269	2559	0.54368	2001	0.51529			25.772
cd06571	104.589	20604	197	90	1.08	96	0.94248	210	0.92891	146	0.93505	138	0.96475	177	0.77175	168	0.95579			14.589
cd06572	409.113	79368	194	390	1.35	405	0.933	574	0.92678	534	0.93376	534	0.93543	598	0.93237	610	0.93439			19.113
cd06578	254.031	105677	416	240	0.67	228	0.77346	932	0.68124	699	0.72392	707	0.70531	1428	0.64659	958	0.72085			14.031
cd06583	154.31	44750	290	125	0.86	133	0.78111	551	0.70534	398	0.74981	524	0.68591	792	0.64262	532	0.5777			29.31
cd06587	132.4	42368	320	113	0.62	110	0.73271	800	0.4977	325	0.63699	278	0.68778	1039	0.59071	286	0.60848			19.4
cd06660	307.192	352964	1149	286	0.84	254	0.82694	2074	0.74324	1112	0.77252	1618	0.68405	2683	0.76177	2947	0.78237			21.192
cd06661	123.116	27578	224	99	0.76	102	0.73362	607	0.54019	341	0.65187	313	0.68142	727	0.5185	362	0.68506			24.116
cd06664	138.193	28606	207	122	1.05	116	0.80078	295	0.80228	232	0.8401	242	0.82823	273	0.82986	359	0.82515			16.193
cd06845	168.195	14633	87	144	0.87	147	0.7424	417	0.80732	347	0.76801	361	0.7722	635	0.75083	460	0.70728			24.195
cd06911	107.659	14857	138	86	1.02	90	0.86845	304	0.82473	245	0.81957	219	0.86627	300	0.73897	254	0.85807			21.659
cd06916	90.4407	5336	59	72	1.67	82	0.98225	116	0.99009	112	0.98188	117	0.98793	149	0.98154	128	0.98161			18.4407
cd06919	119.898	7074	59	111	1.62	116	0.9607	134	0.97749	134	0.97889	133	0.97502	139	0.94307	145	0.96709			8.898
cd06920	143.648	15083	105	117	0.79	124	0.5868	377	0.58809	337	0.59214	322	0.62819	756	0.56764	325	0.63932			26.648
cd06971	159.845	26854	168	143	1.02	144	0.77672	408	0.69786	291	0.7971	326	0.79595	451	0.75471	524	0.7235			16.845
cd06974	181.452	32117	177	163	0.89	144	0.67459	411	0.68851	393	0.71676	312	0.75604	560	0.64423	489	0.70595			18.452
cd07025	308.235	62880	204	281	0.94	279	0.81623	700	0.78269	544	0.82363	517	0.81152	777	0.81681	761	0.79158			27.235
cd07026	118.276	12419	105	106	1.4	111	0.97715	152	0.98722	139	0.98852	141	0.98728	146	0.98641	179	0.98244			12.276
cd07040	254.826	108556	426	205	0.6	180	0.56233	1718	0.46093	1015	0.55035	1004	0.48301	2479	0.44311	1289	0.42157			49.826
cd07066	141.619	18977	134	118	0.92	121	0.7269	405	0.65544	330	0.74755	306	0.74228	722	0.60814	349	0.72331			23.619
cd07153	133.505	49397	370	116	0.95	122	0.87852	266	0.84335	246	0.87001	245	0.87766	279	0.80141	263	0.8645			17.505
cd07177	122.031	43687	358	104	0.57	118	0.72654	257	0.67324	180	0.70913	206	0.67187	328	0.54901	200	0.67417			18.031
cd07185	125.79	131702	1047	106	0.93	118	0.88214	788	0.79368	401	0.76187	420	0.78454	609	0.79051	549	0.81168			19.79
cd07304	363.632	52363	144	344	1.39	338	0.9254	623	0.92361	568	0.94292	614	0.92155	724	0.9388	783	0.92127			19.632
cd07307	217.419	13480	62	194	0.56	156	0.45319	417	0.6055	443	0.51235	330	0.61133	930	0.46061	396	0.57854			23.419
cd07323	97.5323	6047	62	75	1.21	84	0.88738	177	0.91664	179	0.90492	157	0.88439	237	0.84996	186	0.86355			22.5323
cd07377	83.9279	34914	416	66	1.01	75	0.95187	233	0.9331	108	0.9786	96	0.98194	98	0.85867	101	0.98441			17.9279
cd07440	148.397	8607	58	113	0.87	114	0.72252	414	0.76564	397	0.70633	373	0.68625	648	0.66318	427	0.73532			35.397
cd07557	123.208	36100	293	91	1	103	0.90228	526	0.83986	380	0.84775	332	0.84749	538	0.85713	379	0.84651			32.208
cd07765	59.1842	6747	114	40	1.15	53	0.82256	139	0.82748	115	0.84239	98	0.85606	131	0.82574	110	0.83828			19.1842
cd07812	154.597	30301	196	141	0.46	134	0.47375	670	0.32805	502	0.36225	300	0.42637	1085	0.45389	394	0.369			13.597
cd07828	176.465	12529	71	148	1.12	149	0.83885	319	0.8579	296	0.83136	326	0.82403	478	0.74103	358	0.73582			28.465
cd07914	196.824	27949	142	191	1.56	192	0.97541	253	0.97217	247	0.96646	249	0.97624	252	0.94799	367	0.96513			5.824
cd07976	319.165	27129	85	316	0.75	132	0.42749	1003	0.44626	812	0.45665	641	0.42544	2989	0.42036	1204	0.3997			3.165
cd07980	157.688	12615	80	123	0.97	113	0.70858	415	0.79874	343	0.73577	339	0.7836	860	0.68238	395	0.57559			34.688
cd07995	223.432	59433	266	208	0.88	204	0.78238	759	0.72032	563	0.75808	654	0.76093	978	0.6722	915	0.74436			15.432
cd08010	268.612	17997	67	246	1.21	254	0.86731	366	0.90818	354	0.8995	365	0.86735	437	0.86087	464	0.84961			22.612
cd08026	114.061	11178	98	102	1.1	103	0.94664	150	0.9696	146	0.96215	143	0.95274	152	0.95992	168	0.95407			12.061
cd08044	153.897	10465	68	133	0.99	140	0.85555	259	0.87291	245	0.86554	189	0.91394	261	0.87586	253	0.85505			20.897
cd08048	119.82	5991	50	84	1.49	97	0.9033	310	0.91313	268	0.89846	242	0.92618	348	0.93291	314	0.91429			35.82
cd08168	108.631	11189	103	87	0.94	74	0.68574	309	0.70869	277	0.73952	271	0.67286	465	0.39829	291	0.63366			21.631
cd08368	72.2513	28756	398	53	0.97	61	0.88416	260	0.80596	146	0.84601	143	0.82685	308	0.63892	136	0.84653			19.2513
cd08768	105.197	6417	61	87	0.96	101	0.87136	124	0.92339	122	0.92192	122	0.93331	129	0.83916	125	0.90907			18.197
cd08774	241.18	24118	100	225	1.28	229	0.90503	418	0.91226	420	0.93227	411	0.92382	512	0.89919	502	0.9004			16.18
cd09030	114.699	8373	73	102	0.93	101	0.77304	183	0.76214	169	0.77475	169	0.77918	219	0.6857	194	0.75922			12.699
cd09212	117.094	16159	138	96	0.69	98	0.64997	322	0.60699	279	0.64856	227	0.68849	431	0.61292	231	0.62994			21.094
cd09233	392.857	22000	56	356	0.97	318	0.72093	820	0.83288	760	0.79987	740	0.79466	1096	0.717	851	0.74639			36.857
cd09281	140.021	27024	193	123	1.2	120	0.81648	261	0.8436	225	0.8723	226	0.8681	312	0.85151	313	0.85152			17.021
cd09294	135.169	26358	195	116	1.53	131	0.9785	164	0.96228	154	0.97743	150	0.96868	153	0.97498	175	0.97333			19.169
cd09487	74.8544	7710	103	56	0.84	60	0.84501	170	0.7744	128	0.76193	109	0.84318	141	0.73978	122	0.8051			18.8544
cd09634	326.972	46430	142	318	0.94	290	0.79694	606	0.83783	534	0.86376	489	0.83692	726	0.79365	730	0.81812			8.972
cd09652	213.82	13043	61	189	0.72	175	0.51442	386	0.55985	377	0.56154	328	0.53295	660	0.42793	466	0.45604			24.82
cd09693	222.357	28017	126	204	0.68	153	0.43432	646	0.43252	487	0.51685	433	0.51032	1127	0.4646	645	0.4858			18.357
cd09725	91.8926	11119	121	79	1.19	87	0.90248	130	0.89351	117	0.90044	123	0.89913	126	0.82375	140	0.86204			12.8926
cd09727	221.294	11286	51	210	1.06	190	0.7498	365	0.8198	351	0.78023	330	0.77608	517	0.66711	478	0.7009			11.294
cd09731	163.847	9667	59	141	0.87	131	0.64412	308	0.73224	294	0.6164	255	0.64467	442	0.58012	315	0.67659			22.847
cd09804	144.891	7969	55	121	1.28	119	0.94675	296	0.97487	299	0.96621	290	0.95071	340	0.91652	312	0.93624			23.891
cd09916	114.425	8353	73	96	0.88	108	0.9262	171	0.95949	147	0.95127	140	0.96533	167	0.86526	148	0.93553			18.425
cd10146	86.8438	19453	224	69	0.97	77	0.85343	151	0.84728	141	0.77963	119	0.83344	187	0.72408	160	0.84707			17.8438
cd10147	161.555	52667	326	145	0.63	141	0.79143	735	0.59293	413	0.69085	307	0.72837	551	0.66311	406	0.69197			16.555
cd10148	91.4478	12254	134	80	1.15	81	0.89295	129	0.91161	114	0.92184	115	0.90261	112	0.84062	164	0.9029			11.4478
cd10315	122.074	13184	108	100	0.94	102	0.76248	287	0.70827	227	0.72199	205	0.7509	374	0.70146	258	0.72819			22.074
cd10316	112.016	6945	62	92	1.16	100	0.69355	166	0.78652	155	0.76798	154	0.77019	186	0.66894	181	0.67294			20.016
cd10719	83.5856	31261	374	65	1.08	80	0.86698	255	0.86634	199	0.89619	239	0.88541	298	0.91681	205	0.90766			18.5856
cd10747	239.651	104488	436	222	1.06	237	0.86911	758	0.843	618	0.85741	625	0.84514	809	0.86487	665	0.85273			17.651
cd11296	359.59	35959	100	338	0.53	214	0.44557	1356	0.4314	843	0.52151	701	0.46582	2056	0.46011	1067	0.43861			21.59
cd11308	96.2	7215	75	76	1.34	93	0.9102	126	0.93367	123	0.89436	118	0.90699	163	0.80909	140	0.92187			20.2
cd11375	204.621	21076	103	173	1	156	0.68497	590	0.70597	481	0.71165	460	0.72165	750	0.67038	646	0.71769			31.621
cd11377	157.543	11028	70	138	0.88	151	0.82339	212	0.84783	231	0.8178	209	0.82292	277	0.83372	235	0.82649			19.543
cd11378	130.605	9926	76	113	0.98	113	0.81854	189	0.86708	191	0.82479	189	0.85259	240	0.72428	231	0.83239			17.605
cd11380	160.471	21824	136	138	1.47	117	0.67856	280	0.75814	257	0.85278	255	0.82367	308	0.83327	368	0.8087			22.471
cd11572	118.975	28316	238	99	1.08	112	0.90544	297	0.86183	221	0.88337	225	0.9012	286	0.8153	233	0.90237			19.975
cd11586	66.15	3969	60	54	0.86	58	0.92278	101	0.94564	84	0.97803	78	0.99391	107	0.95741	84	0.94382			12.15
cd11655	84.8143	5937	70	57	1.1	67	0.79957	190	0.83981	197	0.7207	186	0.7631	267	0.80793	205	0.73151			27.8143
cd11660	67.4526	6408	95	50	1.33	56	0.91954	104	0.98494	93	0.97971	100	0.92229	123	0.95039	99	0.94332			17.4526
cd11684	435.203	32205	74	392	0.91	381	0.76274	1121	0.84657	1088	0.81071	1088	0.81272	1671	0.7989	1282	0.80159			43.203
cd11691	125.672	7666	61	107	0.84	92	0.43439	322	0.43754	261	0.39156	264	0.47428	541	0.29415	332	0.34245			18.672
cd11709	141.63	14163	100	117	0.8	111	0.62534	497	0.56795	334	0.63764	302	0.63605	663	0.53815	351	0.58984			24.63
cd11740	162.809	82544	507	159	1.47	160	0.97158	225	0.95249	197	0.95765	211	0.96348	229	0.9511	261	0.94483			3.809
cd12082	439	23267	53	422	0.68	399	0.63646	674	0.69429	783	0.66231	552	0.71562	2139	0.49927	664	0.61058			17
cd12144	132.241	7670	58	114	1.3	87	0.67678	223	0.85214	202	0.84476	173	0.8373	293	0.80784	219	0.84413			18.241
cd12148	447.959	971623	2169	409	0.37	386	0.55847	7072	0.30873	3277	0.33738	4358	0.35527	0	0.001	7406	0.42566			38.959
cd12151	291.314	60302	207	282	0.96	272	0.84221	609	0.80572	491	0.86162	480	0.82347	744	0.83489	810	0.80817			9.314
cd12152	135.527	44453	328	123	0.84	128	0.84914	291	0.81436	248	0.80618	221	0.83764	243	0.80842	309	0.807			12.527
cd12208	154.425	12354	80	150	1.25	150	0.96754	215	0.97436	218	0.97559	238	0.97779	273	0.97162	255	0.96772			4.425
cd12212	133.089	7453	56	115	1.31	127	0.92162	171	0.9365	175	0.93703	162	0.94053	194	0.87292	177	0.92687			18.089
cd12843	120.397	6983	58	106	1.08	110	0.80565	161	0.85256	161	0.83987	157	0.84827	193	0.77656	181	0.83563			14.397
cd12870	78.0278	5618	72	66	1.01	73	0.81251	106	0.80786	116	0.74419	94	0.7308	120	0.76145	124	0.71302			12.0278
cd12927	118.333	18460	156	103	0.88	99	0.79437	245	0.78108	169	0.85787	172	0.83343	249	0.76506	230	0.7978			15.333
cd12934	55.0429	3853	70	37	1.24	49	0.98325	60	0.99313	63	0.99468	59	0.99468	81	0.95082	62	0.99468			18.0429
cd12935	54.3143	3802	70	36	1.29	47	0.9801	62	0.9866	62	0.95082	60	0.94924	70	0.89102	67	0.92986			18.3143
cd12962	113.841	7855	69	95	1.35	110	0.90536	161	0.89727	160	0.90771	162	0.90978	276	0.73961	170	0.91161			18.841
cd13394	658.556	35562	54	618	0.94	532	0.62375	1197	0.70736	1150	0.70067	1066	0.6369	1789	0.61117	1611	0.63581			40.556
cd13433	74.5342	5441	73	54	1.41	72	0.92674	158	0.93577	139	0.81295	149	0.92359	157	0.81154	140	0.907			20.5342
cd13777	153.189	18689	122	128	0.97	133	0.73843	465	0.72204	354	0.7363	398	0.72361	674	0.64012	408	0.70355			25.189
cd13778	185.371	22986	124	155	0.82	143	0.6271	618	0.65752	462	0.65587	529	0.6986	880	0.6223	547	0.683			30.371
cd13944	294.603	95746	325	275	1.2	276	0.94285	690	0.91988	561	0.91264	648	0.92548	814	0.88282	943	0.91754			19.603
cd14251	394.13	27195	69	370	1.21	357	0.77623	648	0.83489	603	0.82466	646	0.8155	825	0.81237	777	0.79923			24.13
cd14262	191.323	18941	99	173	0.76	167	0.64514	287	0.71042	256	0.68539	238	0.71902	321	0.7132	321	0.67954			18.323
cd14263	122.525	12375	101	106	1.12	115	0.96869	155	0.98054	139	0.99126	133	0.9875	142	0.96689	165	0.9746			16.525
cd14438	55.1731	2869	52	41	1.4	53	0.94942	63	0.97278	63	0.98666	62	0.98234	79	0.97524	66	0.96593			14.1731
cd14458	125.143	7884	63	105	1.2	110	0.87204	227	0.92828	193	0.90201	197	0.89336	293	0.8985	203	0.88797
cd14473	121.21	37575	310	99	0.77	105	0.78401	343	0.7875	282	0.82241	278	0.76489	426	0.69722	320	0.71244
cd14660	123.629	11992	97	105	1.2	115	0.89715	189	0.95805	183	0.93898	157	0.95058	206	0.88395	218	0.91281
cd14745	386.373	19705	51	329	1.3	328	0.83782	1205	0.89629	1166	0.84524	1172	0.87062	1339	0.81582	1369	0.82663
cd14752	231.673	136224	588	203	0.53	184	0.53441	1795	0.44708	988	0.50839	995	0.48144	2831	0.49038	1694	0.51435
cd14785	388.5	39627	102	371	1.09	360	0.8116	928	0.82177	770	0.82787	828	0.83039	1203	0.79542	1009	0.82487
cd14798	136.891	13826	101	124	0.89	122	0.71864	289	0.73299	253	0.74358	194	0.81025	337	0.78174	290	0.72257
cd14947	134.247	26581	198	113	1.01	112	0.75509	375	0.74384	311	0.78351	213	0.78862	397	0.74533	307	0.77184
cd14948	105.4	99287	942	83	0.71	92	0.83043	823	0.59865	463	0.57239	297	0.624	1433	0.29622	235	0.78293
cd15457	170.759	133875	784	152	1.08	139	0.83207	1133	0.75688	686	0.7847	851	0.79643	1636	0.77834	1017	0.79909
cd15481	218.667	15088	69	195	0.94	200	0.79078	448	0.82232	415	0.83091	409	0.79991	562	0.78328	504	0.75681
cd15489	68.5838	13511	197	47	0.78	49	0.76498	427	0.57757	245	0.74924	206	0.69317	602	0.52102	281	0.72179
cd15802	93.8197	5723	61	74	1.35	85	0.79152	149	0.8813	138	0.85458	152	0.85683	195	0.80207	149	0.83804
cd15832	292.49	14917	51	279	1.28	283	0.9233	326	0.95714	328	0.94938	325	0.95332	395	0.84439	386	0.94155

## Sheet: Balibase3
cdd_id	ave_len	nres	num_sq	cols	RE	gsm_cols	GISMO	mft_cols	MAFFT	CLO_cols	CLUSTAL	mus_cols	MUSCLE	da_cols	Dialign	kal_cols	Kalign		vsMFT	vsCLO	vsMUS	vs DA	vs KA		RE	nseq	MFT	CLO	MUS	DA	KA			median #sq
BB12009	112.6	563	5	98	1.92	63	0.71927	264	0.73184	255	0.88827	256	0.78352	258	0.69413	258	0.84916		-0.01257	-0.169	-0.06425	0.02514	-0.12989		1.38611	34.858	-0.0452235	-0.0842333	-0.0631901	-0.0272869	-0.0547551			29
BB12016	494.2	2471	5	952	2.37	96	0.44378	1246	0.77132	1227	0.80282	1227	0.8528	1225	0.77838	1240	0.75665		-0.32754	-0.35904	-0.40902	-0.3346	-0.31287
BB12023	704.2	3521	5	766	2.02	584	0.75819	833	0.81602	806	0.85915	809	0.84617	837	0.7197	818	0.82669		-0.05783	-0.10096	-0.08798	0.03849	-0.0685
BB12040	132.2	661	5	149	1.83	105	0.78253	177	0.71747	164	0.93322	165	0.92551	166	0.89897	187	0.81507		0.06506	-0.15069	-0.14298	-0.11644	-0.03254
BB12002	208	1248	6	216	1.72	206	0.88692	245	0.91086	245	0.90461	242	0.92993	244	0.87686	247	0.93028		-0.02394	-0.01769	-0.04301	0.01006	-0.04336
BB12021	75.6667	454	6	81	1.81	70	0.88079	91	0.7351	87	0.86377	89	0.84201	89	0.80605	88	0.88269		0.14569	0.01702	0.03878	0.07474	-0.0019
BB12030	790.333	4742	6	1094	1.97	513	0.59496	1288	0.70057	1235	0.73621	1229	0.73147	1279	0.63746	1265	0.71608		-0.10561	-0.14125	-0.13651	-0.0425	-0.12112
BB12010	348.286	2438	7	379	1.8	298	0.81822	455	0.85403	448	0.89544	453	0.86506	452	0.85373	455	0.85026		-0.03581	-0.07722	-0.04684	-0.03551	-0.03204
BB12017	472.857	3310	7	515	1.82	440	0.8637	610	0.8339	581	0.88557	583	0.85021	597	0.82824	605	0.81464		0.0298	-0.02187	0.01349	0.03546	0.04906
BB12033	454.714	3183	7	631	1.84	281	0.57418	819	0.62253	782	0.63357	770	0.5825	901	0.55811	818	0.58565		-0.04835	-0.05939	-0.00832	0.01607	-0.01147
BB12036	209.571	1467	7	235	1.87	180	0.88718	243	0.88352	238	0.95775	238	0.94188	242	0.95507	245	0.91795		0.00366	-0.07057	-0.0547	-0.06789	-0.03077
BB12041	113.571	795	7	129	1.7	95	0.6349	169	0.59602	160	0.60597	157	0.63679	166	0.5761	155	0.67568		0.03888	0.02893	-0.00189	0.0588	-0.04078
BB11032	294.75	2358	8	411	1.75	212	0.57828	664	0.38047	550	0.56906	528	0.58547	584	0.56063	539	0.56422		0.19781	0.00922	-0.00719	0.01765	0.01406
BB11038	364.25	2914	8	522	1.79	249	0.69297	789	0.55189	735	0.67256	707	0.59325	782	0.63185	705	0.59874		0.14108	0.02041	0.09972	0.06112	0.09423
BB12003	71.25	570	8	91	1.81	51	0.76328	96	0.85681	94	0.8418	96	0.88684	97	0.79099	94	0.86028		-0.09353	-0.07852	-0.12356	-0.02771	-0.097
BB12007	1020.5	8164	8	1112	1.8	934	0.80674	1345	0.78274	1278	0.82857	1273	0.83307	1292	0.78383	1333	0.80194		0.024	-0.02183	-0.02633	0.02291	0.0048
BB12013	709.875	5679	8	770	1.8	662	0.89138	901	0.86523	843	0.91535	834	0.91508	834	0.87748	868	0.90845		0.02615	-0.02397	-0.0237	0.0139	-0.01707
BB12028	294.5	2356	8	394	1.83	204	0.71935	542	0.68249	540	0.73481	537	0.68452	596	0.67312	509	0.72185		0.03686	-0.01546	0.03483	0.04623	-0.0025
BB40007	1630.12	13041	8	2498	1.79	622	0.23819	2906	0.36999	2759	0.40196	2582	0.40041	3296	0.37351	2763	0.37055		-0.1318	-0.16377	-0.16222	-0.13532	-0.13236
BB12005	209	1881	9	237	1.77	185	0.78548	288	0.79459	256	0.8679	261	0.88185	285	0.80157	282	0.8531		-0.00911	-0.08242	-0.09637	-0.01609	-0.06762
BB12014	97.2222	875	9	148	1.88	49	0.73615	261	0.82268	258	0.90409	257	0.84868	285	0.80563	279	0.87724		-0.08653	-0.16794	-0.11253	-0.06948	-0.14109
BB12032	66.1111	595	9	70	1.66	53	0.72489	101	0.82532	102	0.76773	102	0.75488	105	0.81437	106	0.74917		-0.10043	-0.04284	-0.02999	-0.08948	-0.02428
BB40014	445.222	4007	9	596	1.72	281	0.52752	799	0.6115	756	0.63822	752	0.60582	872	0.58487	788	0.60526		-0.08398	-0.1107	-0.0783	-0.05735	-0.07774
BB50004	429.556	3866	9	528	1.94	383	0.89361	554	0.94097	549	0.93632	550	0.93801	556	0.91388	553	0.94153		-0.04736	-0.04271	-0.0444	-0.02027	-0.04792
BB12031	919.2	9192	10	977	1.61	810	0.74995	1280	0.72659	1139	0.77925	1101	0.79227	1279	0.75574	1188	0.74202		0.02336	-0.0293	-0.04232	-0.00579	0.00793
BB12038	492.4	4924	10	354	1.67	213	0.7386	2501	0.76249	2448	0.81726	2439	0.80064	2493	0.78193	2463	0.80309		-0.02389	-0.07866	-0.06204	-0.04333	-0.06449
BB40019	637.2	6372	10	535	1.72	424	0.81639	2027	0.80921	1989	0.87959	1990	0.86415	1982	0.77917	2026	0.84299		0.00718	-0.0632	-0.04776	0.03722	-0.0266
BB12001	458.273	5041	11	508	1.55	389	0.74293	684	0.75534	626	0.8083	619	0.78027	745	0.70381	651	0.75752		-0.01241	-0.06537	-0.03734	0.03912	-0.01459
BB12039	103.545	1139	11	87	1.53	55	0.79205	454	0.86376	456	0.81416	455	0.86525	420	0.67105	472	0.83717		-0.07171	-0.02211	-0.0732	0.121	-0.04512
BB12044	573.182	6305	11	581	1.57	532	0.79111	754	0.80575	732	0.87044	738	0.82551	766	0.80187	800	0.81885		-0.01464	-0.07933	-0.0344	-0.01076	-0.02774
BB40045	201.273	2214	11	131	1.5	94	0.52012	669	0.59051	636	0.57372	617	0.41653	656	0.49937	648	0.65981		-0.07039	-0.0536	0.10359	0.02075	-0.13969
BB12011	869.083	10429	12	1203	1.73	550	0.56428	1507	0.64413	1427	0.69734	1390	0.70705	1600	0.65567	1460	0.70594		-0.07985	-0.13306	-0.14277	-0.09139	-0.14166
BB12015	192.083	2305	12	289	1.69	87	0.71548	550	0.80021	536	0.86566	533	0.85368	540	0.86951	561	0.8348		-0.08473	-0.15018	-0.1382	-0.15403	-0.11932
BB12029	444.917	5339	12	514	1.53	313	0.61615	606	0.76149	572	0.79213	562	0.79229	616	0.78806	597	0.75637		-0.14534	-0.17598	-0.17614	-0.17191	-0.14022
BB40003	527.083	6325	12	572	1.69	387	0.77251	1116	0.81551	1091	0.84023	1085	0.83015	1117	0.75506	1150	0.80807		-0.043	-0.06772	-0.05764	0.01745	-0.03556
BB40005	590.583	7087	12	688	1.66	391	0.69333	881	0.77531	872	0.80508	840	0.80929	911	0.74825	862	0.79325		-0.08198	-0.11175	-0.11596	-0.05492	-0.09992
BB40008	485.667	5828	12	622	1.53	370	0.77124	857	0.78127	827	0.81173	814	0.78553	930	0.75758	858	0.81652		-0.01003	-0.04049	-0.01429	0.01366	-0.04528
BB12008	436.769	5678	13	451	1.46	365	0.84641	772	0.8423	732	0.89609	694	0.87214	736	0.8704	762	0.87498		0.00411	-0.04968	-0.02573	-0.02399	-0.02857
BB12027	470.615	6118	13	502	1.55	441	0.83765	706	0.87844	669	0.89629	665	0.85206	683	0.8445	710	0.87773		-0.04079	-0.05864	-0.01441	-0.00685	-0.04008
BB12037	734.846	9553	13	624	1.44	462	0.69206	3158	0.62706	3050	0.80473	3080	0.73073	3135	0.65613	3173	0.69534		0.065	-0.11267	-0.03867	0.03593	-0.00328
BB11018	547.929	7671	14	732	1.32	342	0.48583	1384	0.38389	1195	0.41569	1116	0.44107	1724	0.41405	1165	0.39657		0.10194	0.07014	0.04476	0.07178	0.08926
BB40006	403.714	5652	14	427	1.28	323	0.6724	650	0.68245	653	0.69839	629	0.72134	688	0.61423	675	0.70159		-0.01005	-0.02599	-0.04894	0.05817	-0.02919
BB40022	356	4984	14	729	1.61	79	0.43773	1560	0.44684	1500	0.48792	1132	0.45769	1830	0.44416	1333	0.48423		-0.00911	-0.05019	-0.01996	-0.00643	-0.0465
BB40025	293.286	4106	14	318	1.52	233	0.79617	619	0.81351	613	0.83699	612	0.84002	637	0.79376	632	0.83471		-0.01734	-0.04082	-0.04385	0.00241	-0.03854
BB12004	248.6	3729	15	258	1.5	234	0.88781	320	0.91071	311	0.89666	313	0.92939	330	0.85918	330	0.84371		-0.0229	-0.00885	-0.04158	0.02863	0.0441
BB30017	313	4695	15	388	1.33	200	0.50252	443	0.55864	441	0.57843	406	0.57239	566	0.43276	446	0.51642		-0.05612	-0.07591	-0.06987	0.06976	-0.0139
BB20001	295.312	4725	16	680	1.79	82	0.26902	795	0.3825	815	0.44153	755	0.44776	904	0.4108	894	0.5669		-0.11348	-0.17251	-0.17874	-0.14178	-0.29788
BB20020	288.25	4612	16	298	1.5	243	0.81975	622	0.83379	605	0.847	610	0.8465	626	0.80112	649	0.83376		-0.01404	-0.02725	-0.02675	0.01863	-0.01401
BB40043	345	5865	17	381	1.42	219	0.63023	1006	0.65589	1002	0.66827	986	0.6292	1072	0.65437	980	0.59782		-0.02566	-0.03804	0.00103	-0.02414	0.03241
BB40048	734.118	12480	17	745	1.75	538	0.86301	1978	0.86317	1970	0.87527	1923	0.87531	2088	0.8588	2014	0.86977		-0.00016	-0.01226	-0.0123	0.00421	-0.00676
BB12026	267.389	4813	18	269	1.39	240	0.83034	450	0.82021	433	0.85745	429	0.86236	437	0.83905	484	0.81315		0.01013	-0.02711	-0.03202	-0.00871	0.01719
BB30006	303.389	5461	18	752	1.91	92	0.43864	1024	0.65692	1050	0.67566	962	0.57094	1221	0.64249	1068	0.67502		-0.21828	-0.23702	-0.1323	-0.20385	-0.23638
BB50013	283.667	5106	18	327	1.83	256	0.84565	401	0.87738	382	0.91234	385	0.88397	413	0.87769	391	0.89836		-0.03173	-0.06669	-0.03832	-0.03204	-0.05271
BB50016	607.222	10930	18	899	1.29	251	0.50773	2272	0.53442	2137	0.57489	1791	0.52582	3120	0.54397	1935	0.43647		-0.02669	-0.06716	-0.01809	-0.03624	0.07126
BB40009	492.211	9352	19	489	1.19	373	0.68574	1316	0.62622	1217	0.71812	1201	0.69459	1383	0.6092	1319	0.66715		0.05952	-0.03238	-0.00885	0.07654	0.01859
BB20002	601.75	12035	20	825	1.23	58	0.17773	2348	0.21925	2373	0.23772	1990	0.20297	4026	0.33276	1986	0.24387		-0.04152	-0.05999	-0.02524	-0.15503	-0.06614
BB30027	105.5	2110	20	116	1.48	64	0.50388	266	0.6235	255	0.64385	245	0.68482	265	0.55278	251	0.60112		-0.11962	-0.13997	-0.18094	-0.0489	-0.09724
BB20011	176.905	3715	21	177	1.47	99	0.75028	821	0.76995	901	0.84169	900	0.71715	1121	0.74862	880	0.79742		-0.01967	-0.09141	0.03313	0.00166	-0.04714
BB40012	357.955	7875	22	418	1.39	274	0.70476	746	0.78383	651	0.83205	648	0.80247	774	0.76168	680	0.80242		-0.07907	-0.12729	-0.09771	-0.05692	-0.09766
BB40023	984.773	21665	22	659	1.18	481	0.68931	8250	0.62181	8253	0.68807	8369	0.68781	8548	0.66395	8229	0.71434		0.0675	0.00124	0.0015	0.02536	-0.02503
BB40028	310.318	6827	22	280	1.41	246	0.86866	836	0.88009	801	0.90141	776	0.8919	943	0.86627	850	0.86281		-0.01143	-0.03275	-0.02324	0.00239	0.00585
BB20007	408.261	9390	23	440	1.17	373	0.72688	649	0.70595	538	0.75371	550	0.7418	815	0.69123	655	0.71726		0.02093	-0.02683	-0.01492	0.03565	0.00962
BB40020	712.478	16387	23	748	1.48	479	0.73019	1971	0.78818	1989	0.80753	1913	0.82396	2063	0.77802	1984	0.80928		-0.05799	-0.07734	-0.09377	-0.04783	-0.07909
BB40038	313.174	7203	23	148	1.18	98	0.57637	3579	0.56186	3691	0.69567	3128	0.63133	3685	0.65105	3128	0.49727		0.01451	-0.1193	-0.05496	-0.07468	0.0791
BB50007	229.217	5272	23	255	1.02	189	0.59777	519	0.52109	475	0.54695	492	0.62471	677	0.51912	555	0.55163		0.07668	0.05082	-0.02694	0.07865	0.04614
BB20019	485.083	11642	24	499	1.48	455	0.81423	901	0.79175	1000	0.84641	792	0.8181	1160	0.81766	852	0.80273		0.02248	-0.03218	-0.00387	-0.00343	0.0115
BB30007	140.292	3367	24	140	1.44	86	0.75615	590	0.74533	597	0.82176	580	0.71254	599	0.67234	605	0.69877		0.01082	-0.06561	0.04361	0.08381	0.05738
BB40029	163.833	3932	24	197	1.53	88	0.76702	718	0.7719	715	0.81558	713	0.77124	766	0.73702	771	0.81358		-0.00488	-0.04856	-0.00422	0.03	-0.04656
BB40021	363.32	9083	25	470	1.26	213	0.7273	1114	0.76159	1064	0.77117	926	0.77815	1393	0.72451	1168	0.71685		-0.03429	-0.04387	-0.05085	0.00279	0.01045
BB50008	308.654	8025	26	369	1.45	208	0.68173	828	0.76705	805	0.79076	812	0.75552	863	0.6576	838	0.78997		-0.08532	-0.10903	-0.07379	0.02413	-0.10824
BB12035	260.259	7027	27	287	1.28	218	0.82856	530	0.81295	507	0.85138	499	0.86855	569	0.79124	587	0.82712		0.01561	-0.02282	-0.03999	0.03732	0.00144
BB20012	440.926	11905	27	507	1.45	323	0.55445	1007	0.64884	976	0.66654	1194	0.63565	1255	0.63815	1005	0.64826		-0.09439	-0.11209	-0.0812	-0.0837	-0.09381
BB20016	211.333	5706	27	296	1.14	100	0.5169	796	0.56261	782	0.62028	758	0.58205	902	0.5971	793	0.59143		-0.04571	-0.10338	-0.06515	-0.0802	-0.07453
BB40031	404.963	10934	27	500	1.19	139	0.41139	1208	0.44998	1125	0.48628	971	0.48043	1933	0.46992	1414	0.46663		-0.03859	-0.07489	-0.06904	-0.05853	-0.05524
BB40035	725.852	19598	27	1073	1.12	261	0.41952	2834	0.42841	2869	0.53506	2753	0.35228	4446	0.45339	2488	0.47273		-0.00889	-0.11554	0.06724	-0.03387	-0.05321
BB20013	534.071	14954	28	714	1.32	338	0.44927	1199	0.60072	1084	0.62223	1043	0.60668	1327	0.54769	1271	0.60632		-0.15145	-0.17296	-0.15741	-0.09842	-0.15705
BB40001	461.25	12915	28	739	1.06	84	0.30637	1884	0.32885	1905	0.38121	1656	0.31922	3201	0.34918	1989	0.34098		-0.02248	-0.07484	-0.01285	-0.04281	-0.03461
BB50009	441.25	12355	28	550	1.24	306	0.5753	901	0.68905	824	0.70501	683	0.65723	1045	0.6893	836	0.66568		-0.11375	-0.12971	-0.08193	-0.114	-0.09038
BB20009	367.448	10656	29	403	1.59	333	0.84835	526	0.89571	485	0.92594	477	0.90218	531	0.8852	546	0.88802		-0.04736	-0.07759	-0.05383	-0.03685	-0.03967
BB20010	1044.45	30289	29	1252	1.8	577	0.49716	1518	0.8202	1427	0.85188	1393	0.83258	1622	0.82505	1532	0.8258		-0.32304	-0.35472	-0.33542	-0.32789	-0.32864
BB20027	493.276	14305	29	634	1.21	269	0.57377	1606	0.6818	1585	0.69583	1518	0.67863	2185	0.6618	1733	0.67821		-0.10803	-0.12206	-0.10486	-0.08803	-0.10444
BB20029	102.862	2983	29	130	1.34	67	0.6007	213	0.68105	240	0.69995	202	0.68409	266	0.72262	217	0.7059		-0.08035	-0.09925	-0.08339	-0.12192	-0.1052
BB40036	338.483	9816	29	346	1.64	260	0.84062	830	0.91814	832	0.92619	791	0.92915	851	0.90153	869	0.90812		-0.07752	-0.08557	-0.08853	-0.06091	-0.0675
BB40046	492.931	14295	29	681	1.07	275	0.50282	1876	0.55011	1824	0.5739	1702	0.40005	2392	0.37301	2026	0.51697		-0.04729	-0.07108	0.10277	0.12981	-0.01415
BB20024	410.933	12328	30	505	1.08	152	0.37427	1315	0.39505	1239	0.42629	1070	0.41701	2086	0.41594	1515	0.41429		-0.02078	-0.05202	-0.04274	-0.04167	-0.04002
BB40040	417.367	12521	30	364	1.29	242	0.77221	2522	0.80453	2558	0.86293	2497	0.82857	2800	0.75907	2547	0.82845		-0.03232	-0.09072	-0.05636	0.01314	-0.05624
BB50014	575.833	17275	30	605	1.33	486	0.75025	1325	0.78598	1201	0.80385	1150	0.79378	1557	0.73063	1341	0.75618		-0.03573	-0.0536	-0.04353	0.01962	-0.00593
BB20023	217.677	6748	31	229	1.32	197	0.81971	333	0.78315	344	0.82651	306	0.84854	418	0.77029	370	0.82488		0.03656	-0.0068	-0.02883	0.04942	-0.00517
BB30002	540.677	16761	31	714	1.35	363	0.59984	1198	0.68671	1043	0.74102	1012	0.72929	1181	0.64697	1245	0.73024		-0.08687	-0.14118	-0.12945	-0.04713	-0.1304
BB40042	309.355	9590	31	290	1.12	233	0.7768	1717	0.72977	1445	0.77149	1666	0.76227	1777	0.70002	1497	0.74915		0.04703	0.00531	0.01453	0.07678	0.02765
BB20026	604.188	19334	32	962	1.31	275	0.51332	1355	0.71179	1226	0.74142	1203	0.72604	1450	0.69043	1405	0.72467		-0.19847	-0.2281	-0.21272	-0.17711	-0.21135
BB40030	349.406	11181	32	379	1.33	209	0.63873	994	0.73448	888	0.77727	898	0.78016	1037	0.71569	953	0.75182		-0.09575	-0.13854	-0.14143	-0.07696	-0.11309
BB50015	463.688	14838	32	669	1.15	217	0.47289	2338	0.45989	1837	0.53577	1629	0.54871	2677	0.48488	1890	0.46861		0.013	-0.06288	-0.07582	-0.01199	0.00428
BB40015	639.182	21093	33	891	0.79	64	0.20512	4440	0.21102	4639	0.23973	3958	0.23636	7029	0.23377	4511	0.19525		-0.0059	-0.03461	-0.03124	-0.02865	0.00987
BB40027	626.636	20679	33	397	1.03	304	0.64909	4087	0.4641	4361	0.64526	4399	0.61705	4554	0.56802	4462	0.62431		0.18499	0.00383	0.03204	0.08107	0.02478
BB12043	318.088	10815	34	461	1.18	217	0.80247	1098	0.76932	919	0.8414	831	0.82997	1109	0.76097	1056	0.78958		0.03315	-0.03893	-0.0275	0.0415	0.01289
BB30019	356.529	12122	34	405	1.18	244	0.55062	1184	0.66732	1015	0.66486	931	0.61805	1246	0.56897	1066	0.57709		-0.1167	-0.11424	-0.06743	-0.01835	-0.02647
BB40024	547.735	18623	34	726	0.95	277	0.48714	2144	0.53162	1985	0.5592	1730	0.43479	2900	0.51115	2091	0.5319		-0.04448	-0.07206	0.05235	-0.02401	-0.04476
BB40034	356.529	12122	34	403	1.18	233	0.54178	1184	0.67229	1015	0.65003	931	0.61793	1246	0.55014	1066	0.57616		-0.13051	-0.10825	-0.07615	-0.00836	-0.03438
BB40039	665.765	22636	34	651	1.34	492	0.74348	3307	0.76487	3273	0.81735	3155	0.78008	3654	0.74329	3348	0.77978		-0.02139	-0.07387	-0.0366	0.00019	-0.0363
BB50001	532.588	18108	34	755	1.32	361	0.62369	965	0.72062	878	0.75569	905	0.72106	1105	0.67002	1001	0.70888		-0.09693	-0.132	-0.09737	-0.04633	-0.08519
BB20035	689.8	24143	35	964	1.74	218	0.3186	1309	0.80887	1267	0.83831	1221	0.8149	1467	0.77789	1324	0.8292		-0.49027	-0.51971	-0.4963	-0.45929	-0.5106
BB40013	194.257	6799	35	158	1.2	83	0.66935	978	0.70293	974	0.72795	969	0.6883	1099	0.62909	900	0.68735		-0.03358	-0.0586	-0.01895	0.04026	-0.018
BB30008	526.806	18965	36	531	1.52	339	0.58455	1493	0.65643	1417	0.69871	1376	0.63998	1841	0.62973	1416	0.66858		-0.07188	-0.11416	-0.05543	-0.04518	-0.08403
BB40026	584.472	21041	36	749	1.13	379	0.52843	2095	0.56395	1960	0.6245	1896	0.55954	2563	0.51538	2003	0.56097		-0.03552	-0.09607	-0.03111	0.01305	-0.03254
BB50011	436.556	15716	36	403	1.18	239	0.49345	1543	0.65735	1430	0.63094	1385	0.61031	2171	0.56303	1493	0.50638		-0.1639	-0.13749	-0.11686	-0.06958	-0.01293
BB20015	193.919	7175	37	236	0.83	109	0.35719	394	0.41345	394	0.47405	302	0.43296	561	0.43318	362	0.46318		-0.05626	-0.11686	-0.07577	-0.07599	-0.10599
BB30016	291.297	10778	37	418	1.13	51	0.09206	1082	0.30755	1188	0.41845	918	0.30922	1376	0.33702	1129	0.31352		-0.21549	-0.32639	-0.21716	-0.24496	-0.22146
BB30009	171.447	6515	38	230	0.86	50	0.1861	358	0.32717	440	0.34266	275	0.39085	451	0.33696	330	0.33841		-0.14107	-0.15656	-0.20475	-0.15086	-0.15231
BB40011	465.179	18142	39	829	0.93	92	0.34793	2790	0.37703	2643	0.36917	2136	0.3538	5234	0.24726	2253	0.3752		-0.0291	-0.02124	-0.00587	0.10067	-0.02727
BB20005	426.19	17900	42	445	1.43	225	0.39786	796	0.76905	778	0.764	663	0.78428	1155	0.70201	723	0.77233		-0.37119	-0.36614	-0.38642	-0.30415	-0.37447
BB20038	115.857	4866	42	117	1.61	100	0.87057	251	0.91543	244	0.91943	247	0.92271	255	0.87684	277	0.87853		-0.04486	-0.04886	-0.05214	-0.00627	-0.00796
BB40016	224.095	9412	42	277	0.93	90	0.54413	966	0.63439	906	0.67025	809	0.65036	1199	0.60106	875	0.64213		-0.09026	-0.12612	-0.10623	-0.05693	-0.098
BB40017	224.095	9412	42	277	0.93	90	0.54413	966	0.63439	906	0.67025	809	0.65036	1199	0.60106	875	0.64213		-0.09026	-0.12612	-0.10623	-0.05693	-0.098
BB50003	558.047	23996	43	737	1.22	362	0.46437	1896	0.5562	1629	0.5802	1603	0.57438	2194	0.48561	1879	0.54262		-0.09183	-0.11583	-0.11001	-0.02124	-0.07825
BB30014	217.318	9562	44	238	1.22	182	0.68763	338	0.8412	332	0.88603	312	0.88453	357	0.72945	359	0.8483		-0.15357	-0.1984	-0.1969	-0.04182	-0.16067
BB20017	652.822	29377	45	678	1.69	630	0.88736	869	0.92034	820	0.93713	816	0.93523	951	0.91665	976	0.92193		-0.03298	-0.04977	-0.04787	-0.02929	-0.03457
BB40037	251.87	11586	46	572	1.11	85	0.50946	1116	0.37417	1143	0.47014	1001	0.36638	1215	0.56697	1025	0.62381		0.13529	0.03932	0.14308	-0.05751	-0.11435
BB40044	162.745	7649	47	188	1	102	0.76455	818	0.70651	614	0.73572	528	0.75975	1086	0.70205	591	0.63944		0.05804	0.02883	0.0048	0.0625	0.12511
BB20033	110.958	5326	48	118	1.65	101	0.88655	176	0.92329	173	0.94192	177	0.93776	199	0.84875	224	0.89781		-0.03674	-0.05537	-0.05121	0.0378	-0.01126
BB20041	695.375	33378	48	919	1.02	268	0.50735	2693	0.56657	2376	0.58034	2160	0.56487	4054	0.56306	2387	0.57129		-0.05922	-0.07299	-0.05752	-0.05571	-0.06394
BB50012	707.755	34680	49	1032	0.86	264	0.43587	4051	0.51534	3464	0.50123	2974	0.525	6618	0.49763	3138	0.47463		-0.07947	-0.06536	-0.08913	-0.06176	-0.03876
BB30004	497.26	24863	50	607	1.3	374	0.77651	910	0.81984	882	0.82634	860	0.81617	990	0.77439	1056	0.78121		-0.04333	-0.04983	-0.03966	0.00212	-0.0047
BB30010	655.54	32777	50	678	1.56	610	0.80777	1491	0.87862	1454	0.90886	1422	0.90862	1604	0.87781	1620	0.89039		-0.07085	-0.10109	-0.10085	-0.07004	-0.08262
BB20006	252.118	12858	51	259	1.39	240	0.93112	338	0.94545	330	0.92561	339	0.95885	370	0.8945	412	0.91941		-0.01433	0.00551	-0.02773	0.03662	0.01171
BB20018	321.472	17038	53	337	1.44	307	0.9277	458	0.92951	435	0.95893	435	0.95895	464	0.92216	488	0.94705		-0.00181	-0.03123	-0.03125	0.00554	-0.01935
BB20021	692.34	36694	53	755	1.54	605	0.79708	1249	0.8643	1232	0.89983	1191	0.88178	1337	0.8771	1338	0.87394		-0.06722	-0.10275	-0.0847	-0.08002	-0.07686
BB20028	332.87	17975	54	351	1.69	264	0.9028	756	0.96504	746	0.96241	717	0.96487	782	0.9412	805	0.9577		-0.06224	-0.05961	-0.06207	-0.0384	-0.0549
BB40047	581.759	31415	54	726	0.84	225	0.55937	5141	0.55399	5324	0.60075	4841	0.60622	7092	0.55797	5671	0.56812		0.00538	-0.04138	-0.04685	0.0014	-0.00875
BB20004	628.4	34562	55	666	1.47	559	0.81189	960	0.86889	944	0.87934	943	0.87767	981	0.87218	1098	0.87307		-0.057	-0.06745	-0.06578	-0.06029	-0.06118
BB40002	612.364	33680	55	1130	0.68	58	0.21608	3098	0.12532	4055	0.22209	1838	0.13551	9269	0.15538	2915	0.16304		0.09076	-0.00601	0.08057	0.0607	0.05304
BB40041	310.818	17095	55	466	0.83	55	0.39232	2904	0.40077	2790	0.40883	2275	0.40159	4342	0.22471	2568	0.42611		-0.00845	-0.01651	-0.00927	0.16761	-0.03379
BB20008	522.25	29246	56	809	1	99	0.24096	3142	0.505	2737	0.48454	2459	0.45413	5241	0.40666	2770	0.47128		-0.26404	-0.24358	-0.21317	-0.1657	-0.23032
BB30020	151.339	8475	56	133	1.16	73	0.5281	1058	0.55764	995	0.6697	930	0.60285	1320	0.50146	963	0.59826		-0.02954	-0.1416	-0.07475	0.02664	-0.07016
BB20022	355.069	20594	58	384	1.24	330	0.83968	524	0.83102	496	0.882	492	0.85702	616	0.80779	568	0.84918		0.00866	-0.04232	-0.01734	0.03189	-0.0095
BB20034	266.864	15745	59	265	1.09	239	0.82973	834	0.82866	747	0.85177	803	0.86056	891	0.83407	823	0.82767		0.00107	-0.02204	-0.03083	-0.00434	0.00206
BB20031	211.167	12670	60	215	1.22	190	0.82096	519	0.85366	529	0.88465	483	0.87535	714	0.77792	576	0.84234		-0.0327	-0.06369	-0.05439	0.04304	-0.02138
BB50006	642.617	38557	60	842	0.99	387	0.52469	3152	0.5736	2691	0.59203	2493	0.55212	3684	0.54968	2699	0.58044		-0.04891	-0.06734	-0.02743	-0.02499	-0.05575
BB30030	482.532	29917	62	659	1.01	257	0.67485	2202	0.68655	2040	0.77335	1919	0.71117	3163	0.64321	2101	0.71424		-0.0117	-0.0985	-0.03632	0.03164	-0.03939
BB40049	862	53444	62	1395	0.65	264	0.48875	5696	0.49461	5314	0.55069	4157	0.49751	13633	0.5082	5364	0.45939		-0.00586	-0.06194	-0.00876	-0.01945	0.02936
BB20014	292.031	18982	65	307	1.28	225	0.76353	1245	0.80352	1083	0.8206	1009	0.80779	1614	0.76593	1212	0.7943		-0.03999	-0.05707	-0.04426	-0.0024	-0.03077
BB20037	491.338	31937	65	529	1.11	440	0.79351	1166	0.80076	1130	0.83778	992	0.8123	1695	0.80359	1241	0.8131		-0.00725	-0.04427	-0.01879	-0.01008	-0.01959
BB30011	328.985	21384	65	342	1.33	305	0.90968	560	0.91942	526	0.94254	499	0.91847	539	0.88658	638	0.92946		-0.00974	-0.03286	-0.00879	0.0231	-0.01978
BB30012	397.369	25829	65	492	1.16	293	0.5812	941	0.69952	851	0.71175	812	0.70419	941	0.7088	939	0.69309		-0.11832	-0.13055	-0.12299	-0.1276	-0.11189
BB30022	110.727	7308	66	118	1.4	92	0.74732	257	0.81123	248	0.8325	252	0.81445	289	0.73654	380	0.73382		-0.06391	-0.08518	-0.06713	0.01078	0.0135
BB40004	533.358	35735	67	533	1.29	472	0.87713	1692	0.89414	1511	0.90768	1463	0.90087	1786	0.87523	1621	0.88264		-0.01701	-0.03055	-0.02374	0.0019	-0.00551
BB30024	490.754	33862	69	955	1.57	210	0.46455	1354	0.68686	1266	0.72488	1233	0.7315	1612	0.58837	1496	0.70693		-0.22231	-0.26033	-0.26695	-0.12382	-0.24238
BB20003	449.554	33267	74	443	1.44	410	0.92401	1010	0.93866	945	0.94491	929	0.95001	978	0.9369	989	0.94507		-0.01465	-0.0209	-0.026	-0.01289	-0.02106
BB30025	141.405	10464	74	191	0.93	79	0.45551	747	0.58269	551	0.60517	688	0.65962	858	0.51398	700	0.42553		-0.12718	-0.14966	-0.20411	-0.05847	0.02998
BB30023	275.545	21217	77	349	1.08	219	0.69331	827	0.7306	731	0.79188	772	0.72165	882	0.7478	867	0.71427		-0.03729	-0.09857	-0.02834	-0.05449	-0.02096
BB30018	438.59	34210	78	443	1.41	415	0.84887	880	0.8775	855	0.90971	843	0.81003	916	0.84815	975	0.89197		-0.02863	-0.06084	0.03884	0.00072	-0.0431
BB20025	433.877	35144	81	439	1.46	418	0.90824	916	0.91149	816	0.92852	733	0.90713	941	0.90946	990	0.91311		-0.00325	-0.02028	0.00111	-0.00122	-0.00487
BB30026	411.37	33321	81	505	1.06	288	0.59469	975	0.71956	903	0.74252	842	0.7321	1023	0.65947	1099	0.67955		-0.12487	-0.14783	-0.13741	-0.06478	-0.08486
BB30013	656.256	56438	86	825	1.19	367	0.4863	1718	0.61514	1470	0.68484	1427	0.64463	1842	0.61201	1782	0.66726		-0.12884	-0.19854	-0.15833	-0.12571	-0.18096
BB20040	482.851	42008	87	500	1.33	454	0.85785	911	0.8655	805	0.89121	809	0.89336	1032	0.88472	1062	0.87131		-0.00765	-0.03336	-0.03551	-0.02687	-0.01346
BB20036	130.473	11873	91	138	1.12	102	0.76443	679	0.80835	507	0.8147	487	0.82369	896	0.78367	642	0.82163		-0.04392	-0.05027	-0.05926	-0.01924	-0.0572
BB20039	425.901	38757	91	444	1.63	415	0.87353	652	0.9025	606	0.92236	563	0.90573	839	0.90134	656	0.89293		-0.02897	-0.04883	-0.0322	-0.02781	-0.0194
BB30029	514.592	50430	98	555	1.22	445	0.7826	1416	0.78638	1326	0.81908	1264	0.80621	1623	0.77591	1646	0.80366		-0.00378	-0.03648	-0.02361	0.00669	-0.02106
BB30005	479.779	54215	113	518	1.12	371	0.67661	1362	0.79014	1285	0.82875	1257	0.8024	1498	0.74036	1521	0.78873		-0.11353	-0.15214	-0.12579	-0.06375	-0.11212
BB30001	468.009	54289	116	530	1.16	383	0.75759	1048	0.83024	967	0.85242	959	0.81915	1094	0.6982	1158	0.82986		-0.07265	-0.09483	-0.06156	0.05939	-0.07227
BB30021	218.471	30586	140	267	0.98	138	0.52988	613	0.59612	646	0.62524	608	0.59551	848	0.56556	923	0.59748		-0.06624	-0.09536	-0.06563	-0.03568	-0.0676
BB30003	407.387	57849	142	472	0.85	318	0.50568	970	0.48199	796	0.56426	769	0.54308	1107	0.46054	1139	0.50612		0.02369	-0.05858	-0.0374	0.04514	-0.00044

## Sheet: nseqs
cdd_id	ave_len	nres	num_sq	cols	RE	GSM_cols	GISMO	MFT_cols	MAFFT	CLO_cols	CLUSTAL	MUS_cols	MUSCLE	DA_cols	Dialign	KA_cols	Kalign		vsMFT	vsCLO	vsMUS	vs DA	vs KA		nseqs	MAFFT	CLUSTAL-O	MUSCLE	DIALIGN	KALIGN		34.858	-0.0452235	-0.0842333	-0.0631901	-0.0272869	-0.0547551
cd00029	69.26	3463	50	50	1.01	59	0.90223	90	0.93548	88	0.91951	90	0.91462	111	0.86772	98	0.89559		-0.03325	-0.01728	-0.01239	0.03451	0.00664		34.858	-0.0452235	-0.0842333	-0.0631901	-0.0272869	-0.0547551
cd00111	63.48	3174	50	44	1.28	49	0.85597	111	0.93645	98	0.93305	90	0.93805	127	0.88437	132	0.85765		-0.08048	-0.07708	-0.08208	-0.0284	-0.00168		62.2941	-0.0499424	-0.0258979	-0.0318742	0.0329867	-0.00370431
cd06560	190.42	9521	50	166	0.75	162	0.58809	365	0.64456	347	0.67644	342	0.6688	517	0.60712	386	0.57263		-0.05647	-0.08835	-0.08071	-0.01903	0.01546		106.5	-0.0117675	-0.00191833	-0.0284411	0.0482117	0.00674882
cd08048	119.82	5991	50	84	1.49	97	0.9033	310	0.91313	268	0.89846	242	0.92618	348	0.93291	314	0.91429		-0.00983	0.00484	-0.02288	-0.02961	-0.01099		181.471	0.0279585	0.00761157	-0.0219204	0.0619663	0.00200529
cd00107	50.5686	2579	51	33	1.04	33	0.84481	87	0.90389	93	0.7523	74	0.84479	118	0.80969	92	0.79071		-0.05908	0.09251	2e-05	0.03512	0.0541		590.324	0.104422	0.0851546	0.0625585	0.129039	0.0589996
cd00119	133.431	6805	51	124	1.59	118	0.91263	167	0.94209	167	0.92791	173	0.91055	192	0.86147	192	0.91839		-0.02946	-0.01528	0.00208	0.05116	-0.00576
cd01292	315.176	16074	51	276	0.59	67	0.08843	931	0.41852	784	0.24253	563	0.26088	2635	0.21933	694	0.15015		-0.33009	-0.1541	-0.17245	-0.1309	-0.06172
cd09727	221.294	11286	51	210	1.06	190	0.7498	365	0.8198	351	0.78023	330	0.77608	517	0.66711	478	0.7009		-0.07	-0.03043	-0.02628	0.08269	0.0489
cd14745	386.373	19705	51	329	1.3	328	0.83782	1205	0.89629	1166	0.84524	1172	0.87062	1339	0.81582	1369	0.82663		-0.05847	-0.00742	-0.0328	0.022	0.01119
cd15832	292.49	14917	51	279	1.28	283	0.9233	326	0.95714	328	0.94938	325	0.95332	395	0.84439	386	0.94155		-0.03384	-0.02608	-0.03002	0.07891	-0.01825
cd00127	158.865	8261	52	139	1.14	142	0.84972	295	0.88979	287	0.85342	271	0.86092	367	0.81754	290	0.83654		-0.04007	-0.0037	-0.0112	0.03218	0.01318
cd00178	186.75	9711	52	172	1.09	162	0.78242	266	0.86016	256	0.81641	268	0.7906	339	0.62717	342	0.7723		-0.07774	-0.03399	-0.00818	0.15525	0.01012
cd14438	55.1731	2869	52	41	1.4	53	0.94942	63	0.97278	63	0.98666	62	0.98234	79	0.97524	66	0.96593		-0.02336	-0.03724	-0.03292	-0.02582	-0.01651
cd00003	245.906	13033	53	234	1.51	237	0.97688	327	0.98386	315	0.97725	317	0.97447	328	0.9715	356	0.97378		-0.00698	-0.00037	0.00241	0.00538	0.0031
cd00032	261.585	13864	53	244	1.26	234	0.84637	388	0.9022	372	0.91818	379	0.89601	475	0.85357	454	0.85611		-0.05583	-0.07181	-0.04964	-0.0072	-0.00974
cd00042	111.83	5927	53	101	1	84	0.62594	186	0.75368	202	0.67114	158	0.75535	287	0.59147	202	0.59274		-0.12774	-0.0452	-0.12941	0.03447	0.0332
cd00580	121.17	6422	53	113	1.17	112	0.92046	162	0.97698	163	0.95368	161	0.97118	178	0.92667	169	0.94857		-0.05652	-0.03322	-0.05072	-0.00621	-0.02811
cd00588	152.792	8098	53	135	0.85	127	0.70849	220	0.78974	217	0.76459	215	0.78225	361	0.73529	234	0.73563		-0.08125	-0.0561	-0.07376	-0.0268	-0.02714
cd12082	439	23267	53	422	0.68	399	0.63646	674	0.69429	783	0.66231	552	0.71562	2139	0.49927	664	0.61058		-0.05783	-0.02585	-0.07916	0.13719	0.02588
cd00014	127.074	6862	54	107	0.88	107	0.83822	183	0.86556	193	0.78329	173	0.82201	364	0.43185	195	0.71591		-0.02734	0.05493	0.01621	0.40637	0.12231
cd00528	154.519	8344	54	136	1.54	142	0.96349	206	0.98487	198	0.9866	202	0.9822	222	0.96794	217	0.97276		-0.02138	-0.02311	-0.01871	-0.00445	-0.00927
cd13394	658.556	35562	54	618	0.94	532	0.62375	1197	0.70736	1150	0.70067	1066	0.6369	1789	0.61117	1611	0.63581		-0.08361	-0.07692	-0.01315	0.01258	-0.01206
cd00633	81.0545	4458	55	67	1.03	65	0.95758	116	0.98836	106	0.96624	103	0.97395	173	0.67807	113	0.9629		-0.03078	-0.00866	-0.01637	0.27951	-0.00532
cd09804	144.891	7969	55	121	1.28	119	0.94675	296	0.97487	299	0.96621	290	0.95071	340	0.91652	312	0.93624		-0.02812	-0.01946	-0.00396	0.03023	0.01051
cd00021	59.8036	3349	56	39	1.12	51	0.89554	68	0.93389	68	0.88815	67	0.95234	132	0.51316	87	0.90585		-0.03835	0.00739	-0.0568	0.38238	-0.01031
cd00513	123.875	6937	56	107	1.59	115	0.96617	142	0.97965	142	0.97002	141	0.98066	143	0.97222	145	0.97028		-0.01348	-0.00385	-0.01449	-0.00605	-0.00411
cd09233	392.857	22000	56	356	0.97	318	0.72093	820	0.83288	760	0.79987	740	0.79466	1096	0.717	851	0.74639		-0.11195	-0.07894	-0.07373	0.00393	-0.02546
cd12212	133.089	7453	56	115	1.31	127	0.92162	171	0.9365	175	0.93703	162	0.94053	194	0.87292	177	0.92687		-0.01488	-0.01541	-0.01891	0.0487	-0.00525
cd00501	212	12084	57	195	1.21	190	0.70031	471	0.74067	457	0.73625	481	0.72371	541	0.72765	525	0.72229		-0.04036	-0.03594	-0.0234	-0.02734	-0.02198
cd00591	94.8947	5409	57	85	1.19	89	0.96602	125	0.96511	126	0.94336	125	0.96307	137	0.93236	145	0.95794		0.00091	0.02266	0.00295	0.03366	0.00808
cd02407	123.158	7020	57	115	1.41	116	0.94613	192	0.93376	182	0.91994	185	0.91643	230	0.92094	229	0.92191		0.01237	0.02619	0.0297	0.02519	0.02422
cd06157	190.93	10883	57	166	0.79	175	0.77722	280	0.80101	265	0.83402	241	0.78874	331	0.81258	295	0.75781		-0.02379	-0.0568	-0.01152	-0.03536	0.01941
cd00052	86.7414	5031	58	67	1.17	83	0.91132	134	0.93155	113	0.94198	107	0.93962	171	0.90302	130	0.94193		-0.02023	-0.03066	-0.0283	0.0083	-0.03061
cd00087	234.793	13618	58	215	1.41	216	0.87029	370	0.913	331	0.93191	341	0.91559	480	0.85098	422	0.88223		-0.04271	-0.06162	-0.0453	0.01931	-0.01194
cd00187	473.052	27437	58	444	1.46	433	0.78486	636	0.92486	573	0.92369	581	0.91942	689	0.87687	649	0.89012		-0.14	-0.13883	-0.13456	-0.09201	-0.10526
cd00538	159.879	9273	58	127	0.69	102	0.47426	393	0.52555	358	0.52273	290	0.47244	569	0.45748	341	0.51758		-0.05129	-0.04847	0.00182	0.01678	-0.04332
cd00598	341.655	19816	58	325	0.75	245	0.53908	766	0.60395	695	0.62374	633	0.57834	1343	0.54353	777	0.55886		-0.06487	-0.08466	-0.03926	-0.00445	-0.01978
cd01081	302.19	17527	58	283	0.79	257	0.5347	510	0.58548	498	0.57333	465	0.54731	857	0.45632	577	0.50997		-0.05078	-0.03863	-0.01261	0.07838	0.02473
cd01335	240.31	13938	58	204	0.51	119	0.24701	677	0.36673	661	0.33914	463	0.30253	1665	0.25708	635	0.30109		-0.11972	-0.09213	-0.05552	-0.01007	-0.05408
cd07440	148.397	8607	58	113	0.87	114	0.72252	414	0.76564	397	0.70633	373	0.68625	648	0.66318	427	0.73532		-0.04312	0.01619	0.03627	0.05934	-0.0128
cd12144	132.241	7670	58	114	1.3	87	0.67678	223	0.85214	202	0.84476	173	0.8373	293	0.80784	219	0.84413		-0.17536	-0.16798	-0.16052	-0.13106	-0.16735
cd12843	120.397	6983	58	106	1.08	110	0.80565	161	0.85256	161	0.83987	157	0.84827	193	0.77656	181	0.83563		-0.04691	-0.03422	-0.04262	0.02909	-0.02998
cd06916	90.4407	5336	59	72	1.67	82	0.98225	116	0.99009	112	0.98188	117	0.98793	149	0.98154	128	0.98161		-0.00784	0.00037	-0.00568	0.00071	0.00064
cd06919	119.898	7074	59	111	1.62	116	0.9607	134	0.97749	134	0.97889	133	0.97502	139	0.94307	145	0.96709		-0.01679	-0.01819	-0.01432	0.01763	-0.00639
cd09731	163.847	9667	59	141	0.87	131	0.64412	308	0.73224	294	0.6164	255	0.64467	442	0.58012	315	0.67659		-0.08812	0.02772	-0.00055	0.064	-0.03247
cd00015	202.25	12135	60	185	1.06	193	0.90736	232	0.9466	223	0.96014	219	0.94675	241	0.91447	232	0.93761		-0.03924	-0.05278	-0.03939	-0.00711	-0.03025
cd00361	246.167	14770	60	221	1.56	235	0.97197	336	0.98047	336	0.98013	347	0.96617	360	0.97477	346	0.97171		-0.0085	-0.00816	0.0058	-0.0028	0.00026
cd00719	92.2333	5534	60	69	0.78	52	0.46048	261	0.60121	236	0.45572	185	0.59199	431	0.40446	220	0.52145		-0.14073	0.00476	-0.13151	0.05602	-0.06097
cd11586	66.15	3969	60	54	0.86	58	0.92278	101	0.94564	84	0.97803	78	0.99391	107	0.95741	84	0.94382		-0.02286	-0.05525	-0.07113	-0.03463	-0.02104
cd00181	149.918	9145	61	128	0.68	144	0.71447	200	0.77951	225	0.74308	196	0.79581	300	0.67362	221	0.72215		-0.06504	-0.02861	-0.08134	0.04085	-0.00768
cd08768	105.197	6417	61	87	0.96	101	0.87136	124	0.92339	122	0.92192	122	0.93331	129	0.83916	125	0.90907		-0.05203	-0.05056	-0.06195	0.0322	-0.03771
cd09652	213.82	13043	61	189	0.72	175	0.51442	386	0.55985	377	0.56154	328	0.53295	660	0.42793	466	0.45604		-0.04543	-0.04712	-0.01853	0.08649	0.05838
cd11691	125.672	7666	61	107	0.84	92	0.43439	322	0.43754	261	0.39156	264	0.47428	541	0.29415	332	0.34245		-0.00315	0.04283	-0.03989	0.14024	0.09194
cd15802	93.8197	5723	61	74	1.35	85	0.79152	149	0.8813	138	0.85458	152	0.85683	195	0.80207	149	0.83804		-0.08978	-0.06306	-0.06531	-0.01055	-0.04652
cd07307	217.419	13480	62	194	0.56	156	0.45319	417	0.6055	443	0.51235	330	0.61133	930	0.46061	396	0.57854		-0.15231	-0.05916	-0.15814	-0.00742	-0.12535
cd07323	97.5323	6047	62	75	1.21	84	0.88738	177	0.91664	179	0.90492	157	0.88439	237	0.84996	186	0.86355		-0.02926	-0.01754	0.00299	0.03742	0.02383
cd10316	112.016	6945	62	92	1.16	100	0.69355	166	0.78652	155	0.76798	154	0.77019	186	0.66894	181	0.67294		-0.09297	-0.07443	-0.07664	0.02461	0.02061
cd00134	246.063	15502	63	219	0.81	218	0.6716	526	0.69509	497	0.64235	413	0.6427	737	0.64743	601	0.61872		-0.02349	0.02925	0.0289	0.02417	0.05288
cd00186	463.317	29189	63	417	1.06	399	0.77356	1164	0.84032	1150	0.79007	1148	0.79139	1358	0.80926	1399	0.78359		-0.06676	-0.01651	-0.01783	-0.0357	-0.01003
cd00652	188.81	11895	63	173	1.56	181	0.95762	242	0.96771	244	0.97313	246	0.96979	342	0.9302	296	0.95944		-0.01009	-0.01551	-0.01217	0.02742	-0.00182
cd14458	125.143	7884	63	105	1.2	110	0.87204	227	0.92828	193	0.90201	197	0.89336	293	0.8985	203	0.88797		-0.05624	-0.02997	-0.02132	-0.02646	-0.01593
cd00022	89.2154	5799	65	69	1.27	81	0.93942	127	0.96932	123	0.96117	120	0.95785	159	0.86065	131	0.94815		-0.0299	-0.02175	-0.01843	0.07877	-0.00873
cd00010	83.6119	5602	67	63	0.99	79	0.81585	126	0.82591	143	0.8594	110	0.80869	161	0.74406	136	0.75824		-0.01006	-0.04355	0.00716	0.07179	0.05761
cd00160	204.478	13700	67	180	0.85	193	0.77071	273	0.83159	286	0.80328	266	0.79224	423	0.73147	306	0.78892		-0.06088	-0.03257	-0.02153	0.03924	-0.01821
cd08010	268.612	17997	67	246	1.21	254	0.86731	366	0.90818	354	0.8995	365	0.86735	437	0.86087	464	0.84961		-0.04087	-0.03219	-4e-05	0.00644	0.0177
cd00136	94.5735	6431	68	70	0.75	62	0.53007	222	0.65592	207	0.5378	187	0.68074	309	0.46907	239	0.59346		-0.12585	-0.00773	-0.15067	0.061	-0.06339
cd00305	159.941	10876	68	144	1.21	138	0.70313	251	0.75205	250	0.75537	249	0.74821	328	0.71237	331	0.73612		-0.04892	-0.05224	-0.04508	-0.00924	-0.03299
cd06534	445.515	30295	68	427	1.02	427	0.80006	677	0.82642	620	0.82686	597	0.80701	886	0.78918	781	0.78685		-0.02636	-0.0268	-0.00695	0.01088	0.01321
cd08044	153.897	10465	68	133	0.99	140	0.85555	259	0.87291	245	0.86554	189	0.91394	261	0.87586	253	0.85505		-0.01736	-0.00999	-0.05839	-0.02031	0.0005
cd12962	113.841	7855	69	95	1.35	110	0.90536	161	0.89727	160	0.90771	162	0.90978	276	0.73961	170	0.91161		0.00809	-0.00235	-0.00442	0.16575	-0.00625
cd14251	394.13	27195	69	370	1.21	357	0.77623	648	0.83489	603	0.82466	646	0.8155	825	0.81237	777	0.79923		-0.05866	-0.04843	-0.03927	-0.03614	-0.023
cd15481	218.667	15088	69	195	0.94	200	0.79078	448	0.82232	415	0.83091	409	0.79991	562	0.78328	504	0.75681		-0.03154	-0.04013	-0.00913	0.0075	0.03397
cd00179	170.114	11908	70	152	1.23	143	0.70113	215	0.8393	226	0.74539	198	0.8697	214	0.86647	221	0.81834		-0.13817	-0.04426	-0.16857	-0.16534	-0.11721
cd00351	243.214	17025	70	219	1.4	206	0.81118	424	0.86811	409	0.83637	419	0.82862	535	0.82132	475	0.82443		-0.05693	-0.02519	-0.01744	-0.01014	-0.01325
cd00567	389.1	27237	70	370	0.87	354	0.71486	644	0.7703	590	0.77123	570	0.74435	783	0.7339	741	0.72937		-0.05544	-0.05637	-0.02949	-0.01904	-0.01451
cd00651	138.386	9687	70	121	0.74	102	0.29439	234	0.42173	243	0.41458	211	0.34235	601	0.22871	261	0.20479		-0.12734	-0.12019	-0.04796	0.06568	0.0896
cd01614	90.4429	6331	70	83	1.23	83	0.91304	144	0.94324	138	0.93171	139	0.92375	192	0.86629	164	0.91404		-0.0302	-0.01867	-0.01071	0.04675	-0.001
cd06071	291.443	20401	70	277	1.35	262	0.76806	497	0.83742	476	0.84624	501	0.82062	580	0.80366	612	0.80674		-0.06936	-0.07818	-0.05256	-0.0356	-0.03868
cd11377	157.543	11028	70	138	0.88	151	0.82339	212	0.84783	231	0.8178	209	0.82292	277	0.83372	235	0.82649		-0.02444	0.00559	0.00047	-0.01033	-0.0031
cd11655	84.8143	5937	70	57	1.1	67	0.79957	190	0.83981	197	0.7207	186	0.7631	267	0.80793	205	0.73151		-0.04024	0.07887	0.03647	-0.00836	0.06806
cd12934	55.0429	3853	70	37	1.24	49	0.98325	60	0.99313	63	0.99468	59	0.99468	81	0.95082	62	0.99468		-0.00988	-0.01143	-0.01143	0.03243	-0.01143
cd12935	54.3143	3802	70	36	1.29	47	0.9801	62	0.9866	62	0.95082	60	0.94924	70	0.89102	67	0.92986		-0.0065	0.02928	0.03086	0.08908	0.05024
cd00073	107.127	7606	71	89	1.31	99	0.80882	138	0.85128	133	0.85749	123	0.88046	132	0.78023	159	0.84481		-0.04246	-0.04867	-0.07164	0.02859	-0.03599
cd00146	101.31	7193	71	81	0.75	86	0.52632	196	0.53437	197	0.51668	151	0.55305	584	0.35509	174	0.52078		-0.00805	0.00964	-0.02673	0.17123	0.00554
cd00195	162.62	11546	71	141	1.15	148	0.80851	336	0.82162	304	0.8066	308	0.82006	416	0.75284	350	0.81641		-0.01311	0.00191	-0.01155	0.05567	-0.0079
cd07828	176.465	12529	71	148	1.12	149	0.83885	319	0.8579	296	0.83136	326	0.82403	478	0.74103	358	0.73582		-0.01905	0.00749	0.01482	0.09782	0.10303
cd12870	78.0278	5618	72	66	1.01	73	0.81251	106	0.80786	116	0.74419	94	0.7308	120	0.76145	124	0.71302		0.00465	0.06832	0.08171	0.05106	0.09949
cd00115	150.11	10958	73	141	1.1	129	0.77765	215	0.83623	214	0.83326	217	0.84709	272	0.78528	282	0.80285		-0.05858	-0.05561	-0.06944	-0.00763	-0.0252
cd00350	51.5479	3763	73	36	1.38	35	0.93423	84	0.92898	74	0.94892	74	0.88003	97	0.91225	94	0.85637		0.00525	-0.01469	0.0542	0.02198	0.07786
cd00472	64.1507	4683	73	54	1.59	62	0.97421	81	0.97806	81	0.98352	81	0.9721	83	0.99139	92	0.97677		-0.00385	-0.00931	0.00211	-0.01718	-0.00256
cd00504	171.247	12501	73	156	1.27	147	0.76977	259	0.88331	266	0.87714	268	0.86339	355	0.78193	270	0.84772		-0.11354	-0.10737	-0.09362	-0.01216	-0.07795
cd06171	74.5205	5440	73	55	1.01	68	0.99504	91	0.99041	81	0.95621	81	0.95124	86	0.98044	83	0.96186		0.00463	0.03883	0.0438	0.0146	0.03318
cd09030	114.699	8373	73	102	0.93	101	0.77304	183	0.76214	169	0.77475	169	0.77918	219	0.6857	194	0.75922		0.0109	-0.00171	-0.00614	0.08734	0.01382
cd09916	114.425	8353	73	96	0.88	108	0.9262	171	0.95949	147	0.95127	140	0.96533	167	0.86526	148	0.93553		-0.03329	-0.02507	-0.03913	0.06094	-0.00933
cd13433	74.5342	5441	73	54	1.41	72	0.92674	158	0.93577	139	0.81295	149	0.92359	157	0.81154	140	0.907		-0.00903	0.11379	0.00315	0.1152	0.01974
cd00384	326.622	24170	74	314	1.75	317	0.97357	383	0.97749	372	0.98213	376	0.97685	404	0.97309	454	0.97246		-0.00392	-0.00856	-0.00328	0.00048	0.00111
cd02062	180.811	13380	74	158	0.86	149	0.75324	368	0.83761	330	0.81775	297	0.76383	571	0.70491	351	0.75423		-0.08437	-0.06451	-0.01059	0.04833	-0.00099
cd11684	435.203	32205	74	392	0.91	381	0.76274	1121	0.84657	1088	0.81071	1088	0.81272	1671	0.7989	1282	0.80159		-0.08383	-0.04797	-0.04998	-0.03616	-0.03885
cd11308	96.2	7215	75	76	1.34	93	0.9102	126	0.93367	123	0.89436	118	0.90699	163	0.80909	140	0.92187		-0.02347	0.01584	0.00321	0.10111	-0.01167
cd00253	213.5	16226	76	185	0.79	155	0.55898	490	0.59432	421	0.55351	342	0.54584	834	0.40695	517	0.5679		-0.03534	0.00547	0.01314	0.15203	-0.00892
cd04519	285.974	21734	76	257	0.65	222	0.45921	1043	0.52285	1026	0.46709	781	0.54238	1886	0.42783	940	0.47138		-0.06364	-0.00788	-0.08317	0.03138	-0.01217
cd11378	130.605	9926	76	113	0.98	113	0.81854	189	0.86708	191	0.82479	189	0.85259	240	0.72428	231	0.83239		-0.04854	-0.00625	-0.03405	0.09426	-0.01385
cd00020	144.782	11293	78	120	0.7	98	0.26937	443	0.42958	502	0.19831	244	0.72963	1128	0.07037	502	0.28881		-0.16021	0.07106	-0.46026	0.199	-0.01944
cd00081	326.808	25491	78	311	0.55	130	0.36948	1194	0.48898	1042	0.40814	770	0.47252	2799	0.39743	1075	0.34047		-0.1195	-0.03866	-0.10304	-0.02795	0.02901
cd00138	149.321	11647	78	119	0.63	93	0.43726	389	0.54889	348	0.52961	260	0.53437	820	0.28847	386	0.46778		-0.11163	-0.09235	-0.09711	0.14879	-0.03052
cd00537	291.177	23003	79	274	1.04	254	0.75549	421	0.80708	406	0.79988	407	0.79694	472	0.75616	466	0.77996		-0.05159	-0.04439	-0.04145	-0.00067	-0.02447
cd00577	267.772	21154	79	249	0.89	246	0.77136	621	0.77889	569	0.7297	585	0.75929	764	0.68937	655	0.76063		-0.00753	0.04166	0.01207	0.08199	0.01073
cd06550	277.696	21938	79	261	0.8	252	0.7397	360	0.79886	351	0.82388	361	0.86942	441	0.7879	440	0.72172		-0.05916	-0.08418	-0.12972	-0.0482	0.01798
cd00117	98.75	7900	80	81	1.03	80	0.78052	142	0.8859	131	0.82909	125	0.8023	171	0.67146	152	0.78892		-0.10538	-0.04857	-0.02178	0.10906	-0.0084
cd07980	157.688	12615	80	123	0.97	113	0.70858	415	0.79874	343	0.73577	339	0.7836	860	0.68238	395	0.57559		-0.09016	-0.02719	-0.07502	0.0262	0.13299
cd12208	154.425	12354	80	150	1.25	150	0.96754	215	0.97436	218	0.97559	238	0.97779	273	0.97162	255	0.96772		-0.00682	-0.00805	-0.01025	-0.00408	-0.00018
cd06222	145.905	12256	84	121	0.85	127	0.70176	272	0.70684	257	0.70556	237	0.69959	470	0.68286	293	0.60174		-0.00508	-0.0038	0.00217	0.0189	0.10002
cd07976	319.165	27129	85	316	0.75	132	0.42749	1003	0.44626	812	0.45665	641	0.42544	2989	0.42036	1204	0.3997		-0.01877	-0.02916	0.00205	0.00713	0.02779
cd00191	84.4884	7266	86	66	1.12	68	0.79837	125	0.91805	124	0.88858	117	0.83625	335	0.65093	152	0.74645		-0.11968	-0.09021	-0.03788	0.14744	0.05192
cd00413	251.593	21637	86	212	0.8	188	0.59053	675	0.65997	592	0.56793	554	0.57188	1040	0.50486	732	0.46657		-0.06944	0.0226	0.01865	0.08567	0.12396
cd00322	264.908	23047	87	223	0.7	208	0.56634	854	0.64134	711	0.60363	677	0.60341	1279	0.54665	787	0.56047		-0.075	-0.03729	-0.03707	0.01969	0.00587
cd06845	168.195	14633	87	144	0.87	147	0.7424	417	0.80732	347	0.76801	361	0.7722	635	0.75083	460	0.70728		-0.06492	-0.02561	-0.0298	-0.00843	0.03512
cd00088	109.875	9669	88	97	0.78	87	0.70087	193	0.79702	215	0.72053	175	0.80054	254	0.66985	203	0.71511		-0.09615	-0.01966	-0.09967	0.03102	-0.01424
cd00212	91.9775	8186	89	78	1.14	80	0.81485	103	0.83378	110	0.8383	105	0.80317	116	0.80199	119	0.81707		-0.01893	-0.02345	0.01168	0.01286	-0.00222
cd00466	148.367	13353	90	140	1.59	140	0.97985	199	0.98995	195	0.98412	198	0.98443	209	0.96344	334	0.97203		-0.0101	-0.00427	-0.00458	0.01641	0.00782
cd06224	152.333	13710	90	122	0.72	118	0.71333	494	0.74471	569	0.58841	444	0.71407	809	0.5622	506	0.65165		-0.03138	0.12492	-0.00074	0.15113	0.06168
cd00200	324.791	29556	91	289	0.86	253	0.35068	1189	0.6273	1001	0.32096	1065	0.62208	2732	0.12534	1176	0.56688		-0.27662	0.02972	-0.2714	0.22534	-0.2162
cd00412	181.209	16490	91	155	1.41	157	0.91684	233	0.9238	227	0.92669	228	0.92473	262	0.82108	288	0.90373		-0.00696	-0.00985	-0.00789	0.09576	0.01311
cd00070	148.185	13633	92	127	1	127	0.86167	319	0.886	289	0.89088	273	0.88245	415	0.80591	352	0.85486		-0.02433	-0.02921	-0.02078	0.05576	0.00681
cd00172	383.837	35313	92	364	0.96	356	0.83768	811	0.88855	781	0.85772	783	0.84679	990	0.78271	974	0.82856		-0.05087	-0.02004	-0.00911	0.05497	0.00912
cd00317	175.598	16155	92	146	1.09	139	0.73476	536	0.77575	486	0.7186	491	0.69258	737	0.6607	591	0.69747		-0.04099	0.01616	0.04218	0.07406	0.03729
cd00109	70.4894	6626	94	54	1.24	56	0.94704	88	0.96995	87	0.96123	82	0.95883	156	0.94801	118	0.95365		-0.02291	-0.01419	-0.01179	-0.00097	-0.00661
cd01635	347.298	32646	94	313	0.47	239	0.31359	1194	0.34666	1012	0.34487	972	0.31258	3207	0.28291	1259	0.28959		-0.03307	-0.03128	0.00101	0.03068	0.024
cd00449	283.358	26919	95	255	0.97	258	0.7707	508	0.8291	456	0.80159	441	0.77932	620	0.64719	533	0.77355		-0.0584	-0.03089	-0.00862	0.12351	-0.00285
cd11660	67.4526	6408	95	50	1.33	56	0.91954	104	0.98494	93	0.97971	100	0.92229	123	0.95039	99	0.94332		-0.0654	-0.06017	-0.00275	-0.03085	-0.02378
cd00374	216.103	20962	97	195	0.96	173	0.61856	403	0.75553	403	0.71912	388	0.70255	618	0.64157	535	0.67003		-0.13697	-0.10056	-0.08399	-0.02301	-0.05147
cd14660	123.629	11992	97	105	1.2	115	0.89715	189	0.95805	183	0.93898	157	0.95058	206	0.88395	218	0.91281		-0.0609	-0.04183	-0.05343	0.0132	-0.01566
cd00320	100.806	9879	98	93	1.21	91	0.92649	170	0.95726	160	0.93863	159	0.92851	216	0.86801	223	0.9214		-0.03077	-0.01214	-0.00202	0.05848	0.00509
cd01291	350.082	34308	98	326	0.56	175	0.23964	1351	0.3983	1375	0.31344	1193	0.36769	1963	0.36049	1411	0.35072		-0.15866	-0.0738	-0.12805	-0.12085	-0.11108
cd08026	114.061	11178	98	102	1.1	103	0.94664	150	0.9696	146	0.96215	143	0.95274	152	0.95992	168	0.95407		-0.02296	-0.01551	-0.0061	-0.01328	-0.00743
cd14262	191.323	18941	99	173	0.76	167	0.64514	287	0.71042	256	0.68539	238	0.71902	321	0.7132	321	0.67954		-0.06528	-0.04025	-0.07388	-0.06806	-0.0344
cd01037	104.79	10479	100	78	0.61	43	0.30166	424	0.3693	378	0.20632	277	0.40163	818	0.20795	284	0.2247		-0.06764	0.09534	-0.09997	0.09371	0.07696
cd08774	241.18	24118	100	225	1.28	229	0.90503	418	0.91226	420	0.93227	411	0.92382	512	0.89919	502	0.9004		-0.00723	-0.02724	-0.01879	0.00584	0.00463
cd11296	359.59	35959	100	338	0.53	214	0.44557	1356	0.4314	843	0.52151	701	0.46582	2056	0.46011	1067	0.43861		0.01417	-0.07594	-0.02025	-0.01454	0.00696
cd11709	141.63	14163	100	117	0.8	111	0.62534	497	0.56795	334	0.63764	302	0.63605	663	0.53815	351	0.58984		0.05739	-0.0123	-0.01071	0.08719	0.0355
cd14263	122.525	12375	101	106	1.12	115	0.96869	155	0.98054	139	0.99126	133	0.9875	142	0.96689	165	0.9746		-0.01185	-0.02257	-0.01881	0.0018	-0.00591
cd14798	136.891	13826	101	124	0.89	122	0.71864	289	0.73299	253	0.74358	194	0.81025	337	0.78174	290	0.72257		-0.01435	-0.02494	-0.09161	-0.0631	-0.00393
cd00047	261.225	26645	102	231	1.21	230	0.87968	920	0.83417	756	0.83512	794	0.87966	1066	0.7982	897	0.85465		0.04551	0.04456	2e-05	0.08148	0.02503
cd00618	102.176	10422	102	81	0.93	73	0.60024	278	0.61765	228	0.57456	228	0.69096	374	0.72358	265	0.64104		-0.01741	0.02568	-0.09072	-0.12334	-0.0408
cd14785	388.5	39627	102	371	1.09	360	0.8116	928	0.82177	770	0.82787	828	0.83039	1203	0.79542	1009	0.82487		-0.01017	-0.01627	-0.01879	0.01618	-0.01327
cd00205	207.427	21365	103	177	0.76	136	0.62588	545	0.67241	454	0.7272	410	0.66786	826	0.63807	500	0.56107		-0.04653	-0.10132	-0.04198	-0.01219	0.06481
cd01066	236.553	24365	103	208	0.7	212	0.5979	768	0.58416	673	0.59296	567	0.63757	966	0.57662	666	0.59481		0.01374	0.00494	-0.03967	0.02128	0.00309
cd02440	173.165	17836	103	142	0.51	95	0.4723	1070	0.30527	704	0.38029	383	0.48219	1948	0.38195	478	0.39575		0.16703	0.09201	-0.00989	0.09035	0.07655
cd08168	108.631	11189	103	87	0.94	74	0.68574	309	0.70869	277	0.73952	271	0.67286	465	0.39829	291	0.63366		-0.02295	-0.05378	0.01288	0.28745	0.05208
cd09487	74.8544	7710	103	56	0.84	60	0.84501	170	0.7744	128	0.76193	109	0.84318	141	0.73978	122	0.8051		0.07061	0.08308	0.00183	0.10523	0.03991
cd11375	204.621	21076	103	173	1	156	0.68497	590	0.70597	481	0.71165	460	0.72165	750	0.67038	646	0.71769		-0.021	-0.02668	-0.03668	0.01459	-0.03272
cd00241	200.76	20879	104	159	0.41	107	0.20746	956	0.16893	773	0.22397	584	0.19293	1731	0.22391	622	0.11247		0.03853	-0.01651	0.01453	-0.01645	0.09499
cd00483	145.894	15173	104	128	1.31	139	0.93896	253	0.94481	226	0.93443	227	0.94604	294	0.92107	290	0.92735		-0.00585	0.00453	-0.00708	0.01789	0.01161
cd00051	82.7333	8687	105	63	0.97	66	0.91197	176	0.80644	219	0.56762	161	0.80599	317	0.62227	191	0.79324		0.10553	0.34435	0.10598	0.2897	0.11873
cd00161	142.181	14929	105	123	0.76	118	0.70353	378	0.61026	396	0.56906	281	0.63974	1121	0.2302	301	0.62194		0.09327	0.13447	0.06379	0.47333	0.08159
cd00321	184.152	19336	105	159	1.18	158	0.868	381	0.87198	326	0.8787	317	0.87877	421	0.83796	435	0.87896		-0.00398	-0.0107	-0.01077	0.03004	-0.01096
cd06920	143.648	15083	105	117	0.79	124	0.5868	377	0.58809	337	0.59214	322	0.62819	756	0.56764	325	0.63932		-0.00129	-0.00534	-0.04139	0.01916	-0.05252
cd07026	118.276	12419	105	106	1.4	111	0.97715	152	0.98722	139	0.98852	141	0.98728	146	0.98641	179	0.98244		-0.01007	-0.01137	-0.01013	-0.00926	-0.00529
cd00371	79.2453	8400	106	63	1.02	72	0.91946	116	0.9108	110	0.89362	97	0.90579	123	0.79662	101	0.9374		0.00866	0.02584	0.01367	0.12284	-0.01794
cd10315	122.074	13184	108	100	0.94	102	0.76248	287	0.70827	227	0.72199	205	0.7509	374	0.70146	258	0.72819		0.05421	0.04049	0.01158	0.06102	0.03429
cd00164	84.6147	9223	109	65	0.86	79	0.73632	255	0.66789	180	0.73397	133	0.76081	383	0.71167	161	0.73283		0.06843	0.00235	-0.02449	0.02465	0.00349
cd00170	181.1	19921	110	157	0.69	156	0.632	542	0.62439	442	0.64453	335	0.69333	555	0.58528	545	0.66565		0.00761	-0.01253	-0.06133	0.04672	-0.03365
cd00211	152.455	16770	110	136	0.89	137	0.83952	241	0.8383	234	0.85051	216	0.83676	248	0.77601	269	0.82624		0.00122	-0.01099	0.00276	0.06351	0.01328
cd00641	215.055	23656	110	193	1.41	191	0.87595	484	0.88051	433	0.88642	480	0.88963	594	0.86493	538	0.88289		-0.00456	-0.01047	-0.01368	0.01102	-0.00694
cd00140	374.929	41992	112	365	0.98	361	0.90146	616	0.8937	601	0.89003	572	0.91394	720	0.85066	741	0.88534		0.00776	0.01143	-0.01248	0.0508	0.01612
cd00562	118.384	13259	112	102	0.84	107	0.85107	248	0.73939	206	0.8649	212	0.77492	254	0.77857	233	0.84413		0.11168	-0.01383	0.07615	0.0725	0.00694
cd00400	410.708	46410	113	385	0.83	390	0.79298	897	0.78085	752	0.79849	738	0.81336	948	0.82121	952	0.783		0.01213	-0.00551	-0.02038	-0.02823	0.00998
cd00488	90.5133	10228	113	76	1.3	81	0.95395	118	0.97294	122	0.96404	112	0.96256	131	0.92128	146	0.96058		-0.01899	-0.01009	-0.00861	0.03267	-0.00663
cd00653	1170.66	132285	113	1088	1.09	868	0.65633	4690	0.71146	3628	0.69798	3714	0.68079	6260	0.71881	5587	0.66947		-0.05513	-0.04165	-0.02446	-0.06248	-0.01314
cd03127	115.991	13107	113	90	0.79	100	0.72427	344	0.72356	275	0.70665	271	0.82132	473	0.63516	296	0.7361		0.00071	0.01762	-0.09705	0.08911	-0.01183
cd00110	176.719	20146	114	151	0.72	147	0.66521	574	0.58693	370	0.66159	344	0.68989	836	0.59774	442	0.65271		0.07828	0.00362	-0.02468	0.06747	0.0125
cd00185	108.57	12377	114	85	0.82	97	0.69684	425	0.66453	324	0.66287	269	0.72415	557	0.53839	372	0.70825		0.03231	0.03397	-0.02731	0.15845	-0.01141
cd07765	59.1842	6747	114	40	1.15	53	0.82256	139	0.82748	115	0.84239	98	0.85606	131	0.82574	110	0.83828		-0.00492	-0.01983	-0.0335	-0.00318	-0.01572
cd00554	163.93	18852	115	153	1.43	157	0.97026	230	0.97129	228	0.96698	225	0.97298	243	0.94852	320	0.96579		-0.00103	0.00328	-0.00272	0.02174	0.00447
cd00945	230.797	27234	118	200	0.89	198	0.6383	561	0.68385	514	0.56387	454	0.66883	1025	0.5813	532	0.61449		-0.04555	0.07443	-0.03053	0.057	0.02381
cd00067	55.3782	6590	119	36	1.03	46	0.8983	130	0.88473	71	0.94647	74	0.93533	96	0.81653	87	0.92953		0.01357	-0.04817	-0.03703	0.08177	-0.03123
cd00367	91.7227	10915	119	77	1.08	86	0.94208	134	0.92988	121	0.93798	119	0.94161	148	0.92962	145	0.94276		0.0122	0.0041	0.00047	0.01246	-0.00068
cd09725	91.8926	11119	121	79	1.19	87	0.90248	130	0.89351	117	0.90044	123	0.89913	126	0.82375	140	0.86204		0.00897	0.00204	0.00335	0.07873	0.04044
cd00024	77.5656	9463	122	55	0.85	62	0.69595	261	0.66805	178	0.65101	172	0.75083	299	0.55926	174	0.67223		0.0279	0.04494	-0.05488	0.13669	0.02372
cd00024	77.5656	9463	122	55	0.85	62	0.69595	261	0.66805	178	0.65101	172	0.75083	299	0.55926	174	0.67223		0.0279	0.04494	-0.05488	0.13669	0.02372
cd00085	77.6803	9477	122	58	0.77	53	0.6345	234	0.57109	170	0.60349	160	0.65197	266	0.59869	163	0.64653		0.06341	0.03101	-0.01747	0.03581	-0.01203
cd00222	112.361	13708	122	92	1.08	101	0.78151	279	0.7932	212	0.77838	195	0.83538	527	0.71639	250	0.81324		-0.01169	0.00313	-0.05387	0.06512	-0.03173
cd00296	253.361	30910	122	219	0.98	214	0.67594	726	0.64789	610	0.72592	616	0.67429	1059	0.64707	784	0.6456		0.02805	-0.04998	0.00165	0.02887	0.03034
cd06559	228.451	27871	122	208	1.21	209	0.85618	508	0.84937	426	0.83987	410	0.86689	578	0.82957	568	0.81853		0.00681	0.01631	-0.01071	0.02661	0.03765
cd13777	153.189	18689	122	128	0.97	133	0.73843	465	0.72204	354	0.7363	398	0.72361	674	0.64012	408	0.70355		0.01639	0.00213	0.01482	0.09831	0.03488
cd13778	185.371	22986	124	155	0.82	143	0.6271	618	0.65752	462	0.65587	529	0.6986	880	0.6223	547	0.683		-0.03042	-0.02877	-0.0715	0.0048	-0.0559
cd00012	352.272	44034	125	303	0.44	76	0.09639	1670	0.23003	1218	0.24537	894	0.23304	3498	0.21026	1338	0.20088		-0.13364	-0.14898	-0.13665	-0.11387	-0.10449
cd02065	142.928	17866	125	125	0.81	111	0.54375	392	0.58904	304	0.621	284	0.57742	459	0.55964	334	0.61458		-0.04529	-0.07725	-0.03367	-0.01589	-0.07083
cd09693	222.357	28017	126	204	0.68	153	0.43432	646	0.43252	487	0.51685	433	0.51032	1127	0.4646	645	0.4858		0.0018	-0.08253	-0.076	-0.03028	-0.05148
cd00209	175.016	22402	128	157	1.18	154	0.86186	493	0.78951	408	0.79076	392	0.83469	653	0.75511	576	0.8105		0.07235	0.0711	0.02717	0.10675	0.05136
cd00387	134.86	17397	129	125	1.14	120	0.82316	277	0.84196	238	0.83045	254	0.83592	342	0.8264	377	0.82425		-0.0188	-0.00729	-0.01276	-0.00324	-0.00109
cd00594	303.992	39215	129	270	0.81	255	0.7065	1080	0.71349	915	0.72237	1034	0.72134	1608	0.67862	1112	0.67438		-0.00699	-0.01587	-0.01484	0.02788	0.03212
cd01391	326.566	42127	129	279	0.5	244	0.4833	1330	0.28418	1011	0.378	687	0.37836	2634	0.3757	812	0.45431		0.19912	0.1053	0.10494	0.1076	0.02899
cd00079	157.992	20697	131	131	0.82	124	0.67146	395	0.71071	304	0.62612	342	0.67397	608	0.57639	398	0.65139		-0.03925	0.04534	-0.00251	0.09507	0.02007
cd00101	107.174	14147	132	82	0.85	58	0.60587	322	0.61235	241	0.75273	216	0.61943	666	0.62058	267	0.60117		-0.00648	-0.14686	-0.01356	-0.01471	0.0047
cd00336	130.414	17345	133	105	1.11	107	0.92556	248	0.91948	225	0.93084	226	0.93405	238	0.92779	249	0.9277		0.00608	-0.00528	-0.00849	-0.00223	-0.00214
cd00392	128.421	17080	133	114	1.3	110	0.82181	210	0.83843	193	0.86015	186	0.91193	205	0.87281	234	0.86699		-0.01662	-0.03834	-0.09012	-0.051	-0.04518
cd00568	192.662	25624	133	168	0.88	179	0.74885	594	0.70461	502	0.70368	456	0.76829	812	0.73848	538	0.73785		0.04424	0.04517	-0.01944	0.01037	0.011
cd00657	149.383	19868	133	126	0.63	131	0.77151	374	0.71429	373	0.60934	220	0.80066	801	0.58675	306	0.70606		0.05722	0.16217	-0.02915	0.18476	0.06545
cd00009	187.53	25129	134	150	0.61	118	0.45672	733	0.42233	693	0.38783	555	0.42286	1220	0.43404	719	0.4185		0.03439	0.06889	0.03386	0.02268	0.03822
cd01659	97.3134	13040	134	69	0.47	50	0.34618	567	0.22475	496	0.1853	384	0.24208	1070	0.29053	410	0.30375		0.12143	0.16088	0.1041	0.05565	0.04243
cd07066	141.619	18977	134	118	0.92	121	0.7269	405	0.65544	330	0.74755	306	0.74228	722	0.60814	349	0.72331		0.07146	-0.02065	-0.01538	0.11876	0.00359
cd10148	91.4478	12254	134	80	1.15	81	0.89295	129	0.91161	114	0.92184	115	0.90261	112	0.84062	164	0.9029		-0.01866	-0.02889	-0.00966	0.05233	-0.00995
cd00201	50.163	6772	135	31	1.16	31	0.88821	120	0.9157	58	0.95416	54	0.93335	98	0.84976	59	0.9378		-0.02749	-0.06595	-0.04514	0.03845	-0.04959
cd00213	98.4593	13292	135	88	1.2	88	0.90162	124	0.94926	142	0.93559	129	0.94687	132	0.92034	163	0.94448		-0.04764	-0.03397	-0.04525	-0.01872	-0.04286
cd00299	124.378	16791	135	100	0.52	91	0.54557	492	0.40365	312	0.50062	286	0.6611	598	0.4893	288	0.53617		0.14192	0.04495	-0.11553	0.05627	0.0094
cd00432	126.625	17221	136	103	1.05	105	0.79901	305	0.81146	285	0.77171	244	0.75455	368	0.83386	307	0.76106		-0.01245	0.0273	0.04446	-0.03485	0.03795
cd11380	160.471	21824	136	138	1.47	117	0.67856	280	0.75814	257	0.85278	255	0.82367	308	0.83327	368	0.8087		-0.07958	-0.17422	-0.14511	-0.15471	-0.13014
cd00143	299.116	41278	138	257	0.82	230	0.69452	1353	0.64452	967	0.66466	980	0.7477	1793	0.61631	1223	0.65803		0.05	0.02986	-0.05318	0.07821	0.03649
cd00349	146.848	20265	138	131	1.32	137	0.93151	267	0.92837	237	0.91478	213	0.90983	255	0.89358	248	0.92693		0.00314	0.01673	0.02168	0.03793	0.00458
cd06911	107.659	14857	138	86	1.02	90	0.86845	304	0.82473	245	0.81957	219	0.86627	300	0.73897	254	0.85807		0.04372	0.04888	0.00218	0.12948	0.01038
cd09212	117.094	16159	138	96	0.69	98	0.64997	322	0.60699	279	0.64856	227	0.68849	431	0.61292	231	0.62994		0.04298	0.00141	-0.03852	0.03705	0.02003
cd00056	180.823	25496	141	154	0.86	156	0.6794	448	0.70597	353	0.71721	352	0.71717	531	0.65589	415	0.69023		-0.02657	-0.03781	-0.03777	0.02351	-0.01083
cd00060	125.81	17865	142	102	0.72	96	0.59979	511	0.49659	370	0.59269	315	0.6625	828	0.45869	352	0.62732		0.1032	0.0071	-0.06271	0.1411	-0.02753
cd00102	111.831	15880	142	89	0.71	83	0.63795	425	0.54553	291	0.60196	211	0.54878	883	0.20387	247	0.58465		0.09242	0.03599	0.08917	0.43408	0.0533
cd07914	196.824	27949	142	191	1.56	192	0.97541	253	0.97217	247	0.96646	249	0.97624	252	0.94799	367	0.96513		0.00324	0.00895	-0.00083	0.02742	0.01028
cd09634	326.972	46430	142	318	0.94	290	0.79694	606	0.83783	534	0.86376	489	0.83692	726	0.79365	730	0.81812		-0.04089	-0.06682	-0.03998	0.00329	-0.02118
cd00552	105.545	15093	143	91	1.04	99	0.93724	161	0.93051	155	0.90938	161	0.91336	205	0.84232	186	0.89489		0.00673	0.02786	0.02388	0.09492	0.04235
cd00069	113.021	16275	144	95	1.3	98	0.8954	237	0.91268	194	0.85313	179	0.91067	222	0.78108	191	0.9355		-0.01728	0.04227	-0.01527	0.11432	-0.0401
cd07304	363.632	52363	144	344	1.39	338	0.9254	623	0.92361	568	0.94292	614	0.92155	724	0.9388	783	0.92127		0.00179	-0.01752	0.00385	-0.0134	0.00413
cd00027	93.9448	13622	145	72	0.64	72	0.65611	340	0.57418	261	0.54542	226	0.67886	464	0.57703	204	0.67657		0.08193	0.11069	-0.02275	0.07908	-0.02046
cd00756	142.89	20719	145	124	1.2	131	0.93885	240	0.91026	232	0.90219	219	0.94286	231	0.87752	269	0.92563		0.02859	0.03666	-0.00401	0.06133	0.01322
cd00083	80.3425	11730	146	60	0.81	71	0.85258	218	0.82228	154	0.89273	122	0.9584	299	0.71339	134	0.8964		0.0303	-0.04015	-0.10582	0.13919	-0.04382
cd00421	178.728	26273	147	152	1	127	0.69409	372	0.75685	327	0.75839	376	0.75041	523	0.68287	464	0.69804		-0.06276	-0.0643	-0.05632	0.01122	-0.00395
cd00838	230.44	34566	150	199	0.44	143	0.43313	1514	0.28006	849	0.50108	882	0.35512	2964	0.36082	883	0.33735		0.15307	-0.06795	0.07801	0.07231	0.09578
cd00882	191.313	28697	150	160	0.66	155	0.58614	791	0.56366	604	0.57721	568	0.56344	1254	0.51561	641	0.49657		0.02248	0.00893	0.0227	0.07053	0.08957
cd00446	151.901	22937	151	136	1.12	146	0.92792	219	0.93849	198	0.95099	193	0.95921	245	0.93879	252	0.93049		-0.01057	-0.02307	-0.03129	-0.01087	-0.00257
cd03467	118.765	18171	153	98	0.76	92	0.60656	374	0.59256	298	0.59277	278	0.63641	539	0.58876	330	0.60347		0.014	0.01379	-0.02985	0.0178	0.00309
cd00316	436.974	67294	154	403	0.86	389	0.70257	910	0.71056	831	0.69857	809	0.73404	1071	0.73061	976	0.70256		-0.00799	0.004	-0.03147	-0.02804	1e-05
cd00462	186.344	28697	154	171	1.25	180	0.90662	344	0.88677	280	0.90919	280	0.91113	374	0.90332	412	0.9002		0.01985	-0.00257	-0.00451	0.0033	0.00642
cd05992	101.468	15626	154	81	0.75	82	0.73727	239	0.73506	210	0.65748	221	0.69918	307	0.57138	254	0.76256		0.00221	0.07979	0.03809	0.16589	-0.02529
cd06257	74.487	11471	154	55	1.2	64	0.90149	182	0.88128	137	0.93671	134	0.91309	266	0.85728	167	0.90463		0.02021	-0.03522	-0.0116	0.04421	-0.00314
cd00048	85.1032	13191	155	68	0.89	70	0.79551	199	0.77556	159	0.75717	121	0.86094	263	0.60874	137	0.79208		0.01995	0.03834	-0.06543	0.18677	0.00343
cd00487	160.128	24980	156	140	1.23	150	0.89668	301	0.8863	267	0.90364	285	0.88212	391	0.84585	353	0.87343		0.01038	-0.00696	0.01456	0.05083	0.02325
cd01433	135.538	21144	156	112	1.16	121	0.81569	332	0.74049	301	0.83506	300	0.78996	380	0.80528	341	0.78362		0.0752	-0.01937	0.02573	0.01041	0.03207
cd03587	54.5192	8505	156	41	1.14	46	0.91018	93	0.91358	67	0.95108	64	0.92353	77	0.93719	87	0.88219		-0.0034	-0.0409	-0.01335	-0.02701	0.02799
cd12927	118.333	18460	156	103	0.88	99	0.79437	245	0.78108	169	0.85787	172	0.83343	249	0.76506	230	0.7978		0.01329	-0.0635	-0.03906	0.02931	-0.00343
cd00064	73.0438	11687	160	49	0.84	54	0.71521	321	0.60667	209	0.58883	167	0.7297	1257	0.07753	234	0.70229		0.10854	0.12638	-0.01449	0.63768	0.01292
cd05819	295.319	47251	160	271	0.83	180	0.21666	1201	0.57879	865	0.44113	794	0.68307	3496	0.16374	1028	0.66208		-0.36213	-0.22447	-0.46641	0.05292	-0.44542
cd02153	116.497	18756	161	98	1.09	103	0.88387	202	0.82971	170	0.87307	174	0.87613	209	0.71924	235	0.88032		0.05416	0.0108	0.00774	0.16463	0.00355
cd02439	334.522	53858	161	315	1.1	291	0.6934	535	0.80387	499	0.79875	535	0.83178	580	0.83138	613	0.8359		-0.11047	-0.10535	-0.13838	-0.13798	-0.1425
cd00397	192.221	31332	163	166	0.63	167	0.58895	830	0.4628	543	0.53257	410	0.60341	1446	0.46943	537	0.49343		0.12615	0.05638	-0.01446	0.11952	0.09552
cd00531	146.479	23876	163	127	0.57	114	0.4372	413	0.41532	367	0.44558	228	0.49803	631	0.30016	295	0.36237		0.02188	-0.00838	-0.06083	0.13704	0.07483
cd00382	175.976	28860	164	159	0.99	150	0.76462	406	0.7709	303	0.80705	314	0.78887	570	0.74878	420	0.75189		-0.00628	-0.04243	-0.02425	0.01584	0.01273
cd00198	189.934	31529	166	161	0.53	156	0.54066	741	0.38203	575	0.387	377	0.50146	1628	0.35147	465	0.51241		0.15863	0.15366	0.0392	0.18919	0.02825
cd06971	159.845	26854	168	143	1.02	144	0.77672	408	0.69786	291	0.7971	326	0.79595	451	0.75471	524	0.7235		0.07886	-0.02038	-0.01923	0.02201	0.05322
cd00176	241.497	40813	169	213	0.54	231	0.7224	1039	0.56379	1132	0.14862	515	0.73148	4711	0.03666	817	0.52916		0.15861	0.57378	-0.00908	0.68574	0.19324
cd00386	202.288	34389	170	186	0.98	183	0.77797	586	0.77382	441	0.82456	484	0.81397	622	0.81682	567	0.81746		0.00415	-0.04659	-0.036	-0.03885	-0.03949
cd00167	67.462	11536	171	45	0.89	59	0.91525	233	0.82763	223	0.74601	158	0.9239	568	0.42753	178	0.87669		0.08762	0.16924	-0.00865	0.48772	0.03856
cd01425	213.924	36581	171	211	1.2	183	0.86737	418	0.92213	389	0.94504	376	0.92598	443	0.92126	445	0.91717		-0.05476	-0.07767	-0.05861	-0.05389	-0.0498
cd00741	192.931	33377	173	152	0.66	115	0.39721	1098	0.45822	733	0.45635	651	0.49453	1537	0.50445	893	0.39828		-0.06101	-0.05914	-0.09732	-0.10724	-0.00107
cd00355	66.069	11496	174	53	1.14	57	0.99137	80	0.99655	79	0.99509	81	0.99592	84	0.99055	87	0.94917		-0.00518	-0.00372	-0.00455	0.00082	0.0422
cd00427	68.6264	11941	174	57	1.06	63	0.96672	111	0.98192	91	0.98788	95	0.94806	97	0.94594	107	0.94084		-0.0152	-0.02116	0.01866	0.02078	0.02588
cd06561	217.309	38029	175	198	0.76	187	0.66779	443	0.65552	401	0.7019	428	0.67487	608	0.60499	484	0.6498		0.01227	-0.03411	-0.00708	0.0628	0.01799
cd00326	243.955	43180	177	227	1.07	202	0.77066	966	0.76572	756	0.72876	770	0.79051	1184	0.66537	955	0.77008		0.00494	0.0419	-0.01985	0.10529	0.00058
cd00677	63.226	11191	177	46	0.99	47	0.51074	80	0.77758	81	0.77688	72	0.9266	85	0.77851	88	0.77713		-0.26684	-0.26614	-0.41586	-0.26777	-0.26639
cd06974	181.452	32117	177	163	0.89	144	0.67459	411	0.68851	393	0.71676	312	0.75604	560	0.64423	489	0.70595		-0.01392	-0.04217	-0.08145	0.03036	-0.03136
cd00190	246.787	43928	178	232	1.07	217	0.83263	713	0.79097	530	0.85388	513	0.8332	828	0.77366	765	0.78274		0.04166	-0.02125	-0.00057	0.05897	0.04989
cd00090	97.743	17496	179	77	0.71	77	0.70632	303	0.63295	206	0.6947	129	0.75089	312	0.62749	171	0.75931		0.07337	0.01162	-0.04457	0.07883	-0.05299
cd00338	156.194	28115	180	137	0.78	147	0.76376	365	0.71067	298	0.76181	270	0.78126	419	0.67485	313	0.75063		0.05309	0.00195	-0.0175	0.08891	0.01313
cd00159	193.63	35047	181	169	0.76	176	0.77553	799	0.65163	557	0.77341	394	0.76332	962	0.68426	607	0.7813		0.1239	0.00212	0.01221	0.09127	-0.00577
cd00985	199.171	36050	181	178	0.88	166	0.59447	537	0.61425	459	0.60819	537	0.60786	691	0.63114	833	0.60568		-0.01978	-0.01372	-0.01339	-0.03667	-0.01121
cd00130	123.984	22813	184	103	0.41	99	0.46508	650	0.27983	398	0.37764	221	0.47277	850	0.4372	214	0.49155		0.18525	0.08744	-0.00769	0.02788	-0.02647
cd00267	269.468	50121	186	208	0.74	203	0.66235	2437	0.60875	2077	0.55525	1904	0.67258	4415	0.64362	2420	0.61213		0.0536	0.1071	-0.01023	0.01873	0.05022
cd00516	315.263	58639	186	262	0.85	261	0.6337	956	0.64822	818	0.56925	907	0.66958	1092	0.64009	1101	0.67127		-0.01452	0.06445	-0.03588	-0.00639	-0.03757
cd00229	224.17	42144	188	188	0.45	159	0.44633	1587	0.29058	1020	0.35599	668	0.41732	2749	0.37944	839	0.37763		0.15575	0.09034	0.02901	0.06689	0.0687
cd00084	85.1244	16429	193	66	0.92	79	0.91374	194	0.89752	162	0.93185	142	0.9318	230	0.9174	146	0.93499		0.01622	-0.01811	-0.01806	-0.00366	-0.02125
cd00291	79.456	15335	193	69	0.95	70	0.89775	165	0.87602	116	0.88863	121	0.90558	124	0.82834	199	0.86943		0.02173	0.00912	-0.00783	0.06941	0.02832
cd04371	104.984	20262	193	81	0.81	90	0.71087	392	0.6954	332	0.66442	314	0.73219	473	0.69723	298	0.76712		0.01547	0.04645	-0.02132	0.01364	-0.05625
cd09281	140.021	27024	193	123	1.2	120	0.81648	261	0.8436	225	0.8723	226	0.8681	312	0.85151	313	0.85152		-0.02712	-0.05582	-0.05162	-0.03503	-0.03504
cd06572	409.113	79368	194	390	1.35	405	0.933	574	0.92678	534	0.93376	534	0.93543	598	0.93237	610	0.93439		0.00622	-0.00076	-0.00243	0.00063	-0.00139
cd09294	135.169	26358	195	116	1.53	131	0.9785	164	0.96228	154	0.97743	150	0.96868	153	0.97498	175	0.97333		0.01622	0.00107	0.00982	0.00352	0.00517
cd00207	101.066	19809	196	84	0.87	66	0.65535	363	0.64832	259	0.63634	297	0.68271	425	0.47808	339	0.63851		0.00703	0.01901	-0.02736	0.17727	0.01684
cd00433	490.857	96208	196	469	1.05	440	0.78329	1171	0.76123	926	0.78894	919	0.78762	1482	0.74594	1496	0.76712		0.02206	-0.00565	-0.00433	0.03735	0.01617
cd07812	154.597	30301	196	141	0.46	134	0.47375	670	0.32805	502	0.36225	300	0.42637	1085	0.45389	394	0.369		0.1457	0.1115	0.04738	0.01986	0.10475
cd00551	406.096	80001	197	363	0.56	270	0.38615	2252	0.3907	1693	0.45626	1233	0.40388	3937	0.45035	1989	0.39573		-0.00455	-0.07011	-0.01773	-0.0642	-0.00958
cd06571	104.589	20604	197	90	1.08	96	0.94248	210	0.92891	146	0.93505	138	0.96475	177	0.77175	168	0.95579		0.01357	0.00743	-0.02227	0.17073	-0.01331
cd15489	68.5838	13511	197	47	0.78	49	0.76498	427	0.57757	245	0.74924	206	0.69317	602	0.52102	281	0.72179		0.18741	0.01574	0.07181	0.24396	0.04319
cd00593	166.909	33048	198	133	0.92	140	0.79333	749	0.77715	570	0.77651	648	0.81398	1163	0.75576	666	0.7818		0.01618	0.01682	-0.02065	0.03757	0.01153
cd14947	134.247	26581	198	113	1.01	112	0.75509	375	0.74384	311	0.78351	213	0.78862	397	0.74533	307	0.77184		0.01125	-0.02842	-0.03353	0.00976	-0.01675
cd00518	156.131	31070	199	140	0.85	142	0.86327	359	0.79874	266	0.86161	291	0.8515	380	0.75019	395	0.84456		0.06453	0.00166	0.01177	0.11308	0.01871
cd00525	228.09	45618	200	182	0.72	130	0.36424	815	0.45654	665	0.43745	553	0.42654	1136	0.4758	870	0.43348		-0.0923	-0.07321	-0.0623	-0.11156	-0.06924
cd02883	145.345	29069	200	123	0.64	107	0.61064	782	0.4026	430	0.48441	303	0.63144	1000	0.438	419	0.53582		0.20804	0.12623	-0.0208	0.17264	0.07482
cd05188	293.995	58799	200	275	0.74	254	0.66895	936	0.64658	739	0.67376	624	0.68234	1255	0.67636	875	0.64539		0.02237	-0.00481	-0.01339	-0.00741	0.02356
cd00431	180.824	36888	204	162	0.81	147	0.78785	491	0.73626	398	0.7425	360	0.78745	610	0.77657	486	0.76845		0.05159	0.04535	0.0004	0.01128	0.0194
cd07025	308.235	62880	204	281	0.94	279	0.81623	700	0.78269	544	0.82363	517	0.81152	777	0.81681	761	0.79158		0.03354	-0.0074	0.00471	-0.00058	0.02465
cd06225	68.7902	14102	205	48	0.75	68	0.88862	194	0.77314	137	0.79906	106	0.89082	175	0.84043	121	0.87219		0.11548	0.08956	-0.0022	0.04819	0.01643
cd06093	128.889	26680	207	106	0.69	108	0.77312	528	0.61764	332	0.70187	287	0.75344	777	0.6161	305	0.77571		0.15548	0.07125	0.01968	0.15702	-0.00259
cd06664	138.193	28606	207	122	1.05	116	0.80078	295	0.80228	232	0.8401	242	0.82823	273	0.82986	359	0.82515		-0.0015	-0.03932	-0.02745	-0.02908	-0.02437
cd12151	291.314	60302	207	282	0.96	272	0.84221	609	0.80572	491	0.86162	480	0.82347	744	0.83489	810	0.80817		0.03649	-0.01941	0.01874	0.00732	0.03404
cd04100	105.352	22124	210	87	1	97	0.87867	252	0.87324	207	0.89115	198	0.86021	262	0.82282	218	0.88493		0.00543	-0.01248	0.01846	0.05585	-0.00626
cd00403	228.38	48645	213	206	0.93	198	0.72183	479	0.71686	402	0.75644	436	0.73301	640	0.69061	560	0.71985		0.00497	-0.03461	-0.01118	0.03122	0.00198
cd00379	175.83	39386	224	155	0.82	152	0.73323	352	0.73776	359	0.79277	345	0.78714	405	0.74902	400	0.75321		-0.00453	-0.05954	-0.05391	-0.01579	-0.01998
cd06661	123.116	27578	224	99	0.76	102	0.73362	607	0.54019	341	0.65187	313	0.68142	727	0.5185	362	0.68506		0.19343	0.08175	0.0522	0.21512	0.04856
cd10146	86.8438	19453	224	69	0.97	77	0.85343	151	0.84728	141	0.77963	119	0.83344	187	0.72408	160	0.84707		0.00615	0.0738	0.01999	0.12935	0.00636
cd00046	183.432	42006	229	146	0.73	146	0.64015	641	0.56281	605	0.64349	523	0.60442	1062	0.60244	711	0.58268		0.07734	-0.00334	0.03573	0.03771	0.05747
cd11572	118.975	28316	238	99	1.08	112	0.90544	297	0.86183	221	0.88337	225	0.9012	286	0.8153	233	0.90237		0.04361	0.02207	0.00424	0.09014	0.00307
cd00077	166.573	41310	248	146	0.51	126	0.43795	755	0.36803	565	0.43224	387	0.46677	1130	0.35623	484	0.40808		0.06992	0.00571	-0.02882	0.08172	0.02987
cd00569	58.9286	14850	252	42	1.14	55	0.98787	108	0.96489	96	0.98059	85	0.9793	97	0.96466	88	0.96026		0.02298	0.00728	0.00857	0.02321	0.02761
cd06261	218.609	55308	253	191	0.51	191	0.65422	695	0.52618	435	0.6488	475	0.63065	853	0.6744	607	0.60438		0.12804	0.00542	0.02357	-0.02018	0.04984
cd00347	239.824	61395	256	217	0.41	211	0.29966	621	0.2917	524	0.31157	495	0.29815	754	0.30382	680	0.29799		0.00796	-0.01191	0.00151	-0.00416	0.00167
cd07995	223.432	59433	266	208	0.88	204	0.78238	759	0.72032	563	0.75808	654	0.76093	978	0.6722	915	0.74436		0.06206	0.0243	0.02145	0.11018	0.03802
cd00165	91.6704	24476	267	74	0.72	61	0.71384	294	0.76665	220	0.73497	174	0.7392	311	0.69187	225	0.69633		-0.05281	-0.02113	-0.02536	0.02197	0.01751
cd00688	387.351	103810	268	302	0.64	219	0.27558	2724	0.32242	2273	0.33185	1723	0.35015	5197	0.40803	2327	0.42017		-0.04684	-0.05627	-0.07457	-0.13245	-0.14459
cd02409	87.8769	23551	268	67	0.68	69	0.61923	217	0.6454	191	0.59264	232	0.61053	367	0.44367	211	0.62939		-0.02617	0.02659	0.0087	0.17556	-0.01016
cd06167	184.802	49527	268	151	0.56	136	0.59046	791	0.51515	607	0.49954	532	0.55315	1446	0.45825	764	0.49449		0.07531	0.09092	0.03731	0.13221	0.09597
cd00104	60.6447	16556	273	41	1.04	44	0.84947	172	0.80176	136	0.76558	125	0.77791	154	0.72686	155	0.75988		0.04771	0.08389	0.07156	0.12261	0.08959
cd00306	296.62	81274	274	233	0.6	222	0.52781	3199	0.39995	2281	0.42886	1542	0.49425	5329	0.50967	2503	0.46149		0.12786	0.09895	0.03356	0.01814	0.06632
cd04369	123.323	34407	279	99	0.77	111	0.78173	585	0.66157	452	0.7107	395	0.7922	656	0.68586	379	0.76117		0.12016	0.07103	-0.01047	0.09587	0.02056
cd00033	78.0694	22484	288	57	0.85	69	0.85397	349	0.69894	203	0.75882	155	0.78257	1131	0.1353	175	0.78627		0.15503	0.09515	0.0714	0.71867	0.0677
cd00761	208.921	60587	290	190	0.51	140	0.4499	1497	0.36537	785	0.44946	508	0.47521	2333	0.48035	670	0.43746		0.08453	0.00044	-0.02531	-0.03045	0.01244
cd06583	154.31	44750	290	125	0.86	133	0.78111	551	0.70534	398	0.74981	524	0.68591	792	0.64262	532	0.5777		0.07577	0.0313	0.0952	0.13849	0.20341
cd00038	134.73	39476	293	115	0.64	116	0.79796	441	0.71692	343	0.73211	254	0.83281	572	0.80515	296	0.83076		0.08104	0.06585	-0.03485	-0.00719	-0.0328
cd07557	123.208	36100	293	91	1	103	0.90228	526	0.83986	380	0.84775	332	0.84749	538	0.85713	379	0.84651		0.06242	0.05453	0.05479	0.04515	0.05577
cd00041	134.105	39561	295	112	0.84	118	0.78845	739	0.66286	434	0.6609	377	0.79348	2223	0.51621	396	0.78658		0.12559	0.12755	-0.00503	0.27224	0.00187
cd00329	133.447	39367	295	106	0.76	110	0.62459	414	0.56801	379	0.5756	315	0.59628	628	0.64152	405	0.4842		0.05658	0.04899	0.02831	-0.01693	0.14039
cd02325	80.1689	24211	302	60	0.81	66	0.75076	281	0.81117	253	0.77359	178	0.86418	286	0.64846	212	0.72965		-0.06041	-0.02283	-0.11342	0.1023	0.02111
cd00156	130.987	40344	308	113	0.83	124	0.85655	389	0.7726	249	0.81565	230	0.85061	345	0.81551	361	0.81304		0.08395	0.0409	0.00594	0.04104	0.04351
cd02257	438.777	135582	309	321	0.69	285	0.57079	5669	0.51529	3530	0.49353	3219	0.55041	12002	0.53623	4987	0.50607		0.0555	0.07726	0.02038	0.03456	0.06472
cd14473	121.21	37575	310	99	0.77	105	0.78401	343	0.7875	282	0.82241	278	0.76489	426	0.69722	320	0.71244		-0.00349	-0.0384	0.01912	0.08679	0.07157
cd00158	110.112	34355	312	89	0.83	90	0.80278	572	0.68251	379	0.72936	332	0.76912	668	0.73276	338	0.78248		0.12027	0.07342	0.03366	0.07002	0.0203
cd00055	71.934	22875	318	50	0.98	53	0.82142	273	0.82371	170	0.7965	198	0.82076	580	0.1499	180	0.80431		-0.00229	0.02492	0.00066	0.67152	0.01711
cd00086	79.1887	25182	318	59	0.91	67	0.94356	329	0.82495	235	0.89453	158	0.97707	240	0.89415	160	0.91638		0.11861	0.04903	-0.03351	0.04941	0.02718
cd00640	320.846	102350	319	289	0.81	280	0.77331	791	0.72079	655	0.7526	686	0.71007	1138	0.66297	933	0.7108		0.05252	0.02071	0.06324	0.11034	0.06251
cd06587	132.4	42368	320	113	0.62	110	0.73271	800	0.4977	325	0.63699	278	0.68778	1039	0.59071	286	0.60848		0.23501	0.09572	0.04493	0.142	0.12423
cd00385	275.852	89652	325	243	0.56	218	0.49637	975	0.42951	825	0.40716	847	0.47487	1715	0.39661	913	0.49167		0.06686	0.08921	0.0215	0.09976	0.0047
cd13944	294.603	95746	325	275	1.2	276	0.94285	690	0.91988	561	0.91264	648	0.92548	814	0.88282	943	0.91754		0.02297	0.03021	0.01737	0.06003	0.02531
cd10147	161.555	52667	326	145	0.63	141	0.79143	735	0.59293	413	0.69085	307	0.72837	551	0.66311	406	0.69197		0.1985	0.10058	0.06306	0.12832	0.09946
cd03493	114.89	37569	327	98	0.54	109	0.69199	440	0.59159	375	0.64616	339	0.57581	427	0.67536	445	0.45853		0.1004	0.04583	0.11618	0.01663	0.23346
cd12152	135.527	44453	328	123	0.84	128	0.84914	291	0.81436	248	0.80618	221	0.83764	243	0.80842	309	0.807		0.03478	0.04296	0.0115	0.04072	0.04214
cd00043	111.119	36558	329	89	0.67	102	0.87305	431	0.754	293	0.75654	287	0.69818	474	0.45422	338	0.76059		0.11905	0.11651	0.17487	0.41883	0.11246
cd03333	279.605	93388	334	251	0.95	237	0.72359	620	0.77334	498	0.80291	527	0.73762	740	0.73467	659	0.73504		-0.04975	-0.07932	-0.01403	-0.01108	-0.01145
cd00204	154.863	53118	343	126	0.67	135	0.64707	1834	0.27899	1080	0.15633	590	0.67215	3742	0.06141	743	0.35281		0.36808	0.49074	-0.02508	0.58566	0.29426
cd04508	67.6504	23610	349	48	0.96	61	0.90374	268	0.81481	144	0.86473	129	0.84837	188	0.76826	115	0.90621		0.08893	0.03901	0.05537	0.13548	-0.00247
cd00368	517.652	181696	351	475	0.7	424	0.58334	2273	0.5845	1664	0.5736	1818	0.57999	3014	0.62856	2753	0.6112		-0.00116	0.00974	0.00335	-0.04522	-0.02786
cd05466	214.222	75192	351	197	0.69	203	0.86303	853	0.73206	510	0.80766	343	0.86823	537	0.84444	423	0.83705		0.13097	0.05537	-0.0052	0.01859	0.02598
cd00173	100.639	35425	352	78	0.75	82	0.69629	643	0.54154	437	0.53854	371	0.74216	717	0.58477	354	0.70894		0.15475	0.15775	-0.04587	0.11152	-0.01265
cd01427	221.619	78010	352	201	0.54	123	0.54747	1055	0.56426	759	0.47066	601	0.4218	2092	0.52285	765	0.44437		-0.01679	0.07681	0.12567	0.02462	0.1031
cd00121	148.507	52423	353	126	0.67	126	0.69673	739	0.53876	483	0.59984	455	0.54777	1065	0.4962	594	0.65837		0.15797	0.09689	0.14896	0.20053	0.03836
cd00995	503.442	178722	355	464	0.72	461	0.74623	2796	0.62222	2107	0.64926	1728	0.71063	3402	0.71668	2736	0.66915		0.12401	0.09697	0.0356	0.02955	0.07708
cd07177	122.031	43687	358	104	0.57	118	0.72654	257	0.67324	180	0.70913	206	0.67187	328	0.54901	200	0.67417		0.0533	0.01741	0.05467	0.17753	0.05237
cd01514	100.061	36122	361	79	1.02	98	0.96367	212	0.94632	172	0.92947	161	0.94694	235	0.96165	184	0.94566		0.01735	0.0342	0.01673	0.00202	0.01801
cd00636	175.625	64630	368	148	0.49	129	0.54754	834	0.39329	579	0.43688	452	0.40764	930	0.45394	505	0.44534		0.15425	0.11066	0.1399	0.0936	0.1022
cd06260	174.941	64728	370	155	0.67	163	0.7059	593	0.61891	422	0.68129	417	0.6725	656	0.55406	576	0.648		0.08699	0.02461	0.0334	0.15184	0.0579
cd07153	133.505	49397	370	116	0.95	122	0.87852	266	0.84335	246	0.87001	245	0.87766	279	0.80141	263	0.8645		0.03517	0.00851	0.00086	0.07711	0.01402
cd10719	83.5856	31261	374	65	1.08	80	0.86698	255	0.86634	199	0.89619	239	0.88541	298	0.91681	205	0.90766		0.00064	-0.02921	-0.01843	-0.04983	-0.04068
cd06445	95.847	36326	379	79	1.18	82	0.89727	255	0.89693	183	0.87101	182	0.89341	207	0.76816	326	0.90135		0.00034	0.02626	0.00386	0.12911	-0.00408
cd02775	125.805	49064	390	101	0.74	108	0.72204	626	0.66346	390	0.64768	396	0.67578	622	0.65228	448	0.67874		0.05858	0.07436	0.04626	0.06976	0.0433
cd00065	76.2398	29886	392	52	0.84	53	0.84837	652	0.69695	391	0.77719	488	0.77342	1194	0.64975	432	0.78634		0.15142	0.07118	0.07495	0.19862	0.06203
cd08368	72.2513	28756	398	53	0.97	61	0.88416	260	0.80596	146	0.84601	143	0.82685	308	0.63892	136	0.84653		0.0782	0.03815	0.05731	0.24524	0.03763
cd01594	348.789	144050	413	321	0.72	265	0.47339	687	0.50888	657	0.5262	699	0.51167	955	0.55028	833	0.52398		-0.03549	-0.05281	-0.03828	-0.07689	-0.05059
cd05709	283.614	117416	414	202	0.76	154	0.69407	2417	0.57122	1291	0.5444	1752	0.67885	3571	0.70135	2418	0.52764		0.12285	0.14967	0.01522	-0.00728	0.16643
cd06578	254.031	105677	416	240	0.67	228	0.77346	932	0.68124	699	0.72392	707	0.70531	1428	0.64659	958	0.72085		0.09222	0.04954	0.06815	0.12687	0.05261
cd07377	83.9279	34914	416	66	1.01	75	0.95187	233	0.9331	108	0.9786	96	0.98194	98	0.85867	101	0.98441		0.01877	-0.02673	-0.03007	0.0932	-0.03254
cd07040	254.826	108556	426	205	0.6	180	0.56233	1718	0.46093	1015	0.55035	1004	0.48301	2479	0.44311	1289	0.42157		0.1014	0.01198	0.07932	0.11922	0.14076
cd02205	136.062	58915	433	113	0.59	114	0.73681	1266	0.50074	827	0.35648	329	0.70885	1849	0.3062	608	0.66579		0.23607	0.38033	0.02796	0.43061	0.07102
cd10747	239.651	104488	436	222	1.06	237	0.86911	758	0.843	618	0.85741	625	0.84514	809	0.86487	665	0.85273		0.02611	0.0117	0.02397	0.00424	0.01638
cd06174	432.907	190912	441	390	0.39	369	0.62307	3371	0.2052	2131	0.32569	1385	0.47806	9252	0.29659	2043	0.47597		0.41787	0.29738	0.14501	0.32648	0.1471
cd00495	104.935	47011	448	90	1.01	104	0.91742	252	0.87846	217	0.86882	183	0.90888	261	0.8385	236	0.9047		0.03896	0.0486	0.00854	0.07892	0.01272
cd06259	172.915	77639	449	151	0.74	141	0.71788	862	0.67509	512	0.74004	425	0.70419	996	0.64953	670	0.72476		0.04279	-0.02216	0.01369	0.06835	-0.00688
cd00133	102.323	46557	455	85	0.66	88	0.73454	290	0.57552	224	0.62938	159	0.61463	244	0.48292	255	0.54613		0.15902	0.10516	0.11991	0.25162	0.18841
cd00080	93.463	42993	460	71	0.88	83	0.58731	440	0.60492	295	0.58914	551	0.65807	520	0.52518	348	0.59123		-0.01761	-0.00183	-0.07076	0.06213	-0.00392
cd00082	84.8901	39389	464	65	0.72	80	0.86427	303	0.74273	172	0.88193	145	0.87273	232	0.835	160	0.80065		0.12154	-0.01766	-0.00846	0.02927	0.06362
cd00590	92.1125	43385	471	72	0.69	78	0.78607	756	0.59837	472	0.54108	299	0.75511	829	0.67542	292	0.73547		0.1877	0.24499	0.03096	0.11065	0.0506
cd00075	130.506	63165	484	104	0.79	105	0.73109	546	0.66476	370	0.70093	395	0.7205	644	0.5747	448	0.70716		0.06633	0.03016	0.01059	0.15639	0.02393
cd06567	359.772	177008	492	334	0.66	305	0.53062	1738	0.5099	1232	0.50698	1419	0.50269	2559	0.54368	2001	0.51529		0.02072	0.02364	0.02793	-0.01306	0.01533
cd04332	154.929	76690	495	136	0.74	145	0.80386	365	0.77649	338	0.8163	368	0.75113	560	0.77021	528	0.7705		0.02737	-0.01244	0.05273	0.03365	0.03336
cd11740	162.809	82544	507	159	1.47	160	0.97158	225	0.95249	197	0.95765	211	0.96348	229	0.9511	261	0.94483		0.01909	0.01393	0.0081	0.02048	0.02675
cd00473	100.438	51424	512	91	1.04	95	0.96712	239	0.93153	194	0.93381	184	0.95442	197	0.85797	276	0.94863		0.03559	0.03331	0.0127	0.10915	0.01849
cd00174	69.7524	36062	517	51	1.02	54	0.90182	365	0.75601	196	0.78617	172	0.85106	314	0.80379	166	0.88676		0.14581	0.11565	0.05076	0.09803	0.01506
cd00030	135.623	70931	523	102	0.65	101	0.68308	1920	0.42645	970	0.46846	839	0.5794	3186	0.55037	800	0.59075		0.25663	0.21462	0.10368	0.13271	0.09233
cd02696	207.635	108593	523	174	1	177	0.87703	984	0.79783	578	0.80401	539	0.83589	1137	0.78146	774	0.79076		0.0792	0.07302	0.04114	0.09557	0.08627
cd00383	108.996	57114	524	94	1	99	0.9137	259	0.87502	193	0.90703	189	0.91003	205	0.90699	271	0.91014		0.03868	0.00667	0.00367	0.00671	0.00356
cd00105	86.3953	47863	554	64	0.76	74	0.84548	502	0.74992	260	0.77722	219	0.84124	435	0.59152	254	0.81037		0.09556	0.06826	0.00424	0.25396	0.03511
cd00162	66.5198	36985	556	45	0.92	48	0.84649	387	0.65239	213	0.80869	195	0.75817	413	0.51682	187	0.767		0.1941	0.0378	0.08832	0.32967	0.07949
cd00093	75.5215	42141	558	58	0.7	66	0.87726	457	0.71169	249	0.73736	149	0.86611	238	0.79941	150	0.84822		0.16557	0.1399	0.01115	0.07785	0.02904
cd00054	60.0018	33781	563	40	1.06	50	0.839	343	0.769	249	0.42576	143	0.79643	700	0.43335	151	0.84072		0.07	0.41324	0.04257	0.40565	-0.00172
cd00112	56.4788	31967	566	35	1.17	53	0.92959	311	0.83134	169	0.82517	149	0.88873	473	0.58068	142	0.91477		0.09825	0.10442	0.04086	0.34891	0.01482
cd14752	231.673	136224	588	203	0.53	184	0.53441	1795	0.44708	988	0.50839	995	0.48144	2831	0.49038	1694	0.51435		0.08733	0.02602	0.05297	0.04403	0.02006
cd00188	118.866	72627	611	83	0.55	85	0.56028	658	0.46256	457	0.45748	653	0.46235	1122	0.4733	465	0.55428		0.09772	0.1028	0.09793	0.08698	0.006
cd01610	146.303	91732	627	120	0.58	117	0.74833	1189	0.46764	628	0.63616	611	0.56724	1536	0.713	859	0.61088		0.28069	0.11217	0.18109	0.03533	0.13745
cd00196	88.535	55600	628	69	0.46	73	0.57535	466	0.35001	283	0.42893	316	0.41739	549	0.37226	296	0.48241		0.22534	0.14642	0.15796	0.20309	0.09294
cd00352	259.644	165653	638	220	0.78	180	0.69366	1706	0.61444	991	0.67325	1131	0.60728	2197	0.59713	1707	0.63722		0.07922	0.02041	0.08638	0.09653	0.05644
cd01901	217.93	145359	667	163	0.63	159	0.46206	1010	0.55259	885	0.36809	1095	0.50173	1526	0.42528	1052	0.44206		-0.09053	0.09397	-0.03967	0.03678	0.02
cd00475	237.733	159519	671	219	1.34	225	0.95006	752	0.93079	540	0.92526	595	0.94213	769	0.95192	855	0.94673		0.01927	0.0248	0.00793	-0.00186	0.00333
cd06558	214.288	149359	697	195	0.77	204	0.85451	1116	0.71002	715	0.76684	728	0.81306	990	0.82138	1255	0.79462		0.14449	0.08767	0.04145	0.03313	0.05989
cd00063	113.78	84425	742	93	0.61	101	0.67762	853	0.4631	447	0.57466	330	0.56091	3326	0.17332	367	0.63903		0.21452	0.10296	0.11671	0.5043	0.03859
cd15457	170.759	133875	784	152	1.08	139	0.83207	1133	0.75688	686	0.7847	851	0.79643	1636	0.77834	1017	0.79909		0.07519	0.04737	0.03564	0.05373	0.03298
cd06462	126.165	100427	796	85	0.76	94	0.73312	1422	0.54496	1009	0.62907	1051	0.58113	2294	0.50697	949	0.5377		0.18816	0.10405	0.15199	0.22615	0.19542
cd00037	139.467	118965	853	115	0.69	107	0.70255	1425	0.55074	757	0.5656	585	0.58028	2235	0.43838	871	0.63673		0.15181	0.13695	0.12227	0.26417	0.06582
cd00448	126.281	107718	853	107	0.87	113	0.84963	715	0.71624	453	0.75852	586	0.73217	786	0.72086	653	0.72688		0.13339	0.09111	0.11746	0.12877	0.12275
cd00053	57.2445	49402	863	35	0.93	47	0.79209	528	0.65472	261	0.69679	181	0.69332	981	0.4671	159	0.77651		0.13737	0.0953	0.09877	0.32499	0.01558
cd01342	107.481	99635	927	83	0.61	96	0.71834	477	0.59072	289	0.69554	370	0.60944	544	0.66901	280	0.63267		0.12762	0.0228	0.1089	0.04933	0.08567
cd14948	105.4	99287	942	83	0.71	92	0.83043	823	0.59865	463	0.57239	297	0.624	1433	0.29622	235	0.78293		0.23178	0.25804	0.20643	0.53421	0.0475
cd01983	212.025	199940	943	174	0.45	146	0.36579	1496	0.34901	748	0.34586	1136	0.33734	2251	0.413	1538	0.35592		0.01678	0.01993	0.02845	-0.04721	0.00987
cd04301	88.3772	83870	949	65	0.6	76	0.81623	981	0.49329	553	0.57203	672	0.47651	1412	0.61154	334	0.67034		0.32294	0.2442	0.33972	0.20469	0.14589
cd03174	287.627	283025	984	265	0.92	270	0.80498	781	0.78096	617	0.77677	768	0.75784	953	0.76445	957	0.77211		0.02402	0.02821	0.04714	0.04053	0.03287
cd07185	125.79	131702	1047	106	0.93	118	0.88214	788	0.79368	401	0.76187	420	0.78454	609	0.79051	549	0.81168		0.08846	0.12027	0.0976	0.09163	0.07046
cd06223	156.882	171001	1090	130	0.54	133	0.67302	1225	0.51784	642	0.47402	874	0.47902	1480	0.62323	1006	0.60675		0.15518	0.199	0.194	0.04979	0.06627
cd00298	102.636	117723	1147	85	0.71	86	0.82162	701	0.68152	379	0.66956	524	0.59076	775	0.70785	368	0.77241		0.1401	0.15206	0.23086	0.11377	0.04921
cd06660	307.192	352964	1149	286	0.84	254	0.82694	2074	0.74324	1112	0.77252	1618	0.68405	2683	0.76177	2947	0.78237		0.0837	0.05442	0.14289	0.06517	0.04457
cd01392	69.537	94014	1352	52	1.07	66	0.91637	284	0.88565	139	0.92275	131	0.91231	137	0.95107	142	0.88801		0.03072	-0.00638	0.00406	-0.0347	0.02836
cd02116	80.222	130441	1626	60	0.54	71	0.7483	428	0.55784	285	0.56156	302	0.59922	333	0.58141	188	0.59508		0.19046	0.18674	0.14908	0.16689	0.15322
cd03128	117.466	203099	1729	92	0.48	92	0.59229	1189	0.3802	697	0.39502	992	0.31935	0	0.001	801	0.4563		0.21209	0.19727	0.27294		0.13599
cd00096	96.7132	177372	1834	72	0.54	83	0.60615	1145	0.46433	461	0.53849	472	0.42024	0	0.001	364	0.53095		0.14182	0.06766	0.18591		0.0752
cd03440	126.559	233627	1846	100	0.44	104	0.7072	1281	0.43544	616	0.30998	1097	0.30848	0	0.001	753	0.36959		0.27176	0.39722	0.39872		0.33761
cd12148	447.959	971623	2169	409	0.37	386	0.55847	7072	0.30873	3277	0.33738	4358	0.35527	0	0.001	7406	0.42566		0.24974	0.22109	0.2032		0.13281
cd00118	63.9441	153402	2399	45	0.93	55	0.88163	526	0.75904	237	0.73453	364	0.63596	0	0.001	134	0.85603		0.12259	0.1471	0.24567		0.0256

## Sheet: Sort
cdd_id	ave_len	nres	num_sq	cols	RE	GISMO	MAFFT	CLUSTAL	MUSCLE	Dialign	Kalign
cd03524	114.985	7589	66	75	0.61	0.001	0.54362	0.32679	0.43399	0.2554	0.26393
cd01292	315.176	16074	51	276	0.59	0.08843	0.41964	0.24392	0.26024	0.21755	0.14975
cd00012	352.272	44034	125	303	0.44	0.09639	0.22998	0.24449	0.23264	0.20676	0.19983
cd00241	200.76	20879	104	159	0.41	0.20746	0.16996	0.22309	0.19282	0.22293	0.11102
cd05819	295.319	47251	160	271	0.83	0.21666	0.58246	0.44268	0.68207	0.16345	0.66403
cd01291	350.082	34308	98	326	0.56	0.23964	0.39908	0.31393	0.36757	0.36214	0.35065
cd01335	240.31	13938	58	204	0.51	0.24701	0.36849	0.33938	0.30206	0.26036	0.30104
cd00020	144.782	11293	78	120	0.7	0.26937	0.42783	0.19409	0.7289	0.05557	0.28843
cd00688	387.351	103810	268	302	0.64	0.27558	0.31747	0.32881	0.34573	0.40125	0.41979
cd00651	138.386	9687	70	121	0.74	0.29439	0.4211	0.41254	0.34104	0.20765	0.20448
cd00347	239.824	61395	256	217	0.41	0.29966	0.29422	0.3115	0.29778	0.30388	0.29865
cd01037	104.79	10479	100	78	0.61	0.30166	0.37029	0.20804	0.40122	0.19709	0.22334
cd01635	347.298	32646	94	313	0.47	0.31359	0.34903	0.34464	0.31198	0.28293	0.28916
cd01659	97.3134	13040	134	69	0.47	0.34618	0.22867	0.18155	0.24033	0.29013	0.30228
cd00200	324.791	29556	91	289	0.86	0.35068	0.62882	0.32105	0.62143	0.11818	0.56841
cd00525	228.09	45618	200	182	0.72	0.36424	0.45622	0.4373	0.42407	0.47539	0.4316
cd01983	212.025	199940	943	174	0.45	0.36579	0.34749	0.34221	0.33454	0.41042	0.3538
cd00081	326.808	25491	78	311	0.55	0.36948	0.48903	0.40803	0.47138	0.3964	0.34117
cd00551	406.096	80001	197	363	0.56	0.38615	0.39259	0.45723	0.40323	0.4504	0.39627
cd00741	192.931	33377	173	152	0.66	0.39721	0.45935	0.45381	0.49313	0.50341	0.39741
cd07976	319.165	27129	85	316	0.75	0.42749	0.44625	0.45656	0.42443	0.41659	0.39957
cd00838	230.44	34566	150	199	0.44	0.43313	0.28491	0.50541	0.35337	0.36278	0.33627
cd09693	222.357	28017	126	204	0.68	0.43432	0.43211	0.51754	0.51002	0.46654	0.48622
cd11691	125.672	7666	61	107	0.84	0.43439	0.43627	0.39258	0.47344	0.29203	0.34246
cd00531	146.479	23876	163	127	0.57	0.4372	0.41618	0.4463	0.49775	0.29847	0.36312
cd00138	149.321	11647	78	119	0.63	0.43726	0.55056	0.52912	0.53324	0.28504	0.46753
cd00077	166.573	41310	248	146	0.51	0.43795	0.36815	0.43372	0.46636	0.35629	0.40823
cd11296	359.59	35959	100	338	0.53	0.44557	0.43426	0.52132	0.46557	0.45984	0.44007
cd00229	224.17	42144	188	188	0.45	0.44633	0.29677	0.35895	0.41699	0.38127	0.37934
cd00761	208.921	60587	290	190	0.51	0.4499	0.37208	0.45102	0.47468	0.48407	0.43845
cd07307	217.419	13480	62	194	0.56	0.45319	0.60594	0.51266	0.61116	0.46101	0.57867
cd00009	187.53	25129	134	150	0.61	0.45672	0.4252	0.38761	0.42321	0.43416	0.41803
cd04519	285.974	21734	76	257	0.65	0.45921	0.52334	0.46867	0.54218	0.43343	0.4715
cd00719	92.2333	5534	60	69	0.78	0.46048	0.60075	0.45601	0.59345	0.4042	0.52201
cd01901	217.93	145359	667	163	0.63	0.46206	0.54936	0.36076	0.49946	0.41193	0.43926
cd00130	123.984	22813	184	103	0.41	0.46508	0.28836	0.37903	0.47266	0.43778	0.49215
cd02440	173.165	17836	103	142	0.51	0.4723	0.31225	0.38223	0.48046	0.38662	0.39584
cd01594	348.789	144050	413	321	0.72	0.47339	0.50873	0.52598	0.51167	0.54937	0.52393
cd07812	154.597	30301	196	141	0.46	0.47375	0.33522	0.36666	0.42612	0.45483	0.36839
cd00538	159.879	9273	58	127	0.69	0.47426	0.52486	0.52221	0.47167	0.45806	0.51761
cd01391	326.566	42127	129	279	0.5	0.4833	0.2876	0.37876	0.37798	0.37517	0.45486
cd00385	275.852	89652	325	243	0.56	0.49637	0.42937	0.40494	0.47458	0.39594	0.49173
cd00677	63.226	11191	177	46	0.99	0.51074	0.77757	0.77789	0.92659	0.77851	0.77712
cd09652	213.82	13043	61	189	0.72	0.51442	0.56017	0.56177	0.53284	0.42815	0.45649
cd00146	101.31	7193	71	81	0.75	0.52632	0.53361	0.51558	0.55196	0.34874	0.52079
cd00306	296.62	81274	274	233	0.6	0.52781	0.40965	0.43296	0.49315	0.51178	0.46259
cd00136	94.5735	6431	68	70	0.75	0.53007	0.65689	0.53755	0.68068	0.46912	0.59359
cd06567	359.772	177008	492	334	0.66	0.53062	0.51378	0.50687	0.50174	0.54429	0.51721
cd14752	231.673	136224	588	203	0.53	0.53441	0.45602	0.51448	0.48174	0.49024	0.51639
cd01081	302.19	17527	58	283	0.79	0.5347	0.58563	0.57282	0.54722	0.45624	0.50995
cd00598	341.655	19816	58	325	0.75	0.53908	0.60469	0.62405	0.57798	0.54787	0.55902
cd00198	189.934	31529	166	161	0.53	0.54066	0.38692	0.38993	0.5013	0.35335	0.51261
cd02065	142.928	17866	125	125	0.81	0.54375	0.59115	0.621	0.57692	0.55945	0.61537
cd00299	124.378	16791	135	100	0.52	0.54557	0.40812	0.50178	0.66082	0.49026	0.53596
cd01427	221.619	78010	352	201	0.54	0.54747	0.56511	0.47319	0.42175	0.51929	0.44374
cd00636	175.625	64630	368	148	0.49	0.54754	0.39484	0.43929	0.40661	0.45327	0.44481
cd12148	447.959	971623	2169	409	0.37	0.55847	0.32102	0.34346	0.35471	0.001	0.42824
cd00253	213.5	16226	76	185	0.79	0.55898	0.5948	0.55331	0.54591	0.4072	0.56779
cd00188	118.866	72627	611	83	0.55	0.56028	0.46557	0.45657	0.46194	0.46748	0.55469
cd07040	254.826	108556	426	205	0.6	0.56233	0.46219	0.55111	0.48113	0.43428	0.42103
cd00322	264.908	23047	87	223	0.7	0.56634	0.64048	0.60204	0.60172	0.5459	0.56046
cd02257	438.777	135582	309	321	0.69	0.57079	0.52192	0.49583	0.54967	0.54098	0.50759
cd00196	88.535	55600	628	69	0.46	0.57535	0.35313	0.43236	0.41678	0.36919	0.48277
cd00368	517.652	181696	351	475	0.7	0.58334	0.5893	0.5771	0.57923	0.62719	0.61261
cd00882	191.313	28697	150	160	0.66	0.58614	0.56833	0.57758	0.56212	0.51678	0.49726
cd06920	143.648	15083	105	117	0.79	0.5868	0.5891	0.5933	0.62765	0.56774	0.63956
cd00080	93.463	42993	460	71	0.88	0.58731	0.6047	0.58999	0.65797	0.52402	0.59051
cd06560	190.42	9521	50	166	0.75	0.58809	0.64551	0.67677	0.66813	0.60664	0.57185
cd00397	192.221	31332	163	166	0.63	0.58895	0.47042	0.53623	0.60278	0.47092	0.49352
cd06167	184.802	49527	268	151	0.56	0.59046	0.52005	0.50135	0.55238	0.45841	0.49496
cd00413	251.593	21637	86	212	0.8	0.59053	0.65988	0.56828	0.57111	0.50358	0.46597
cd03128	117.466	203099	1729	92	0.48	0.59229	0.39249	0.39722	0.32192	0.001	0.45687
cd00985	199.171	36050	181	178	0.88	0.59447	0.61634	0.60955	0.60739	0.63199	0.60613
cd01066	236.553	24365	103	208	0.7	0.5979	0.58673	0.59354	0.63691	0.57754	0.59493
cd00060	125.81	17865	142	102	0.72	0.59979	0.49818	0.59545	0.66038	0.45891	0.62962
cd00618	102.176	10422	102	81	0.93	0.60024	0.61639	0.57353	0.6897	0.72351	0.63909
cd00101	107.174	14147	132	82	0.85	0.60587	0.61246	0.75233	0.61821	0.61722	0.60131
cd00096	96.7132	177372	1834	72	0.54	0.60615	0.48025	0.54693	0.41854	0.001	0.53137
cd03467	118.765	18171	153	98	0.76	0.60656	0.5939	0.59262	0.63581	0.58819	0.60346
cd02883	145.345	29069	200	123	0.64	0.61064	0.40799	0.4851	0.63082	0.43905	0.53584
cd00374	216.103	20962	97	195	0.96	0.61856	0.75543	0.71979	0.70154	0.64099	0.67016
cd02409	87.8769	23551	268	67	0.68	0.61923	0.64581	0.59487	0.60901	0.43935	0.62922
cd06174	432.907	190912	441	390	0.39	0.62307	0.2117	0.33042	0.4777	0.29469	0.47754
cd13394	658.556	35562	54	618	0.94	0.62375	0.70586	0.70053	0.63595	0.61136	0.63527
cd00329	133.447	39367	295	106	0.76	0.62459	0.57187	0.57563	0.59536	0.64076	0.48514
cd11709	141.63	14163	100	117	0.8	0.62534	0.57564	0.63742	0.63548	0.53744	0.59087
cd00205	207.427	21365	103	177	0.76	0.62588	0.67644	0.72737	0.66683	0.63755	0.55994
cd00042	111.83	5927	53	101	1	0.62594	0.75351	0.67136	0.7549	0.59099	0.59186
cd13778	185.371	22986	124	155	0.82	0.6271	0.6584	0.66044	0.6979	0.62085	0.68274
cd00170	181.1	19921	110	157	0.69	0.632	0.62711	0.64768	0.69318	0.58543	0.66601
cd00516	315.263	58639	186	262	0.85	0.6337	0.65013	0.56864	0.66864	0.63888	0.67024
cd00085	77.6803	9477	122	58	0.77	0.6345	0.57309	0.6034	0.65085	0.5966	0.6464
cd12082	439	23267	53	422	0.68	0.63646	0.6956	0.66221	0.71545	0.49771	0.61152
cd00102	111.831	15880	142	89	0.71	0.63795	0.55064	0.60407	0.5474	0.19927	0.58819
cd00945	230.797	27234	118	200	0.89	0.6383	0.685	0.56338	0.66878	0.58045	0.61511
cd00046	183.432	42006	229	146	0.73	0.64015	0.56214	0.64514	0.60235	0.60232	0.58028
cd09731	163.847	9667	59	141	0.87	0.64412	0.73237	0.61666	0.64413	0.57949	0.67601
cd14262	191.323	18941	99	173	0.76	0.64514	0.71005	0.68462	0.71843	0.71265	0.67961
cd00204	154.863	53118	343	126	0.67	0.64707	0.28508	0.15638	0.67141	0.06227	0.3526
cd09212	117.094	16159	138	96	0.69	0.64997	0.61043	0.64843	0.68746	0.61328	0.62927
cd06261	218.609	55308	253	191	0.51	0.65422	0.52805	0.64932	0.63041	0.67315	0.60404
cd00207	101.066	19809	196	84	0.87	0.65535	0.64994	0.63629	0.68009	0.47478	0.63883
cd00027	93.9448	13622	145	72	0.64	0.65611	0.57963	0.55211	0.67853	0.57721	0.67768
cd00653	1170.66	132285	113	1088	1.09	0.65633	0.71323	0.69869	0.6803	0.71967	0.67016
cd00267	269.468	50121	186	208	0.74	0.66235	0.61433	0.5488	0.67178	0.64362	0.61609
cd00110	176.719	20146	114	151	0.72	0.66521	0.5926	0.66484	0.68941	0.59952	0.65204
cd06561	217.309	38029	175	198	0.76	0.66779	0.65565	0.70221	0.67324	0.60448	0.64897
cd05188	293.995	58799	200	275	0.74	0.66895	0.65411	0.67817	0.68183	0.67809	0.64782
cd00079	157.992	20697	131	131	0.82	0.67146	0.71023	0.62652	0.67201	0.57452	0.65089
cd00134	246.063	15502	63	219	0.81	0.6716	0.69505	0.64359	0.64244	0.64819	0.61868
cd06223	156.882	171001	1090	130	0.54	0.67302	0.51948	0.47696	0.47741	0.6216	0.60621
cd06974	181.452	32117	177	163	0.89	0.67459	0.68782	0.71737	0.75643	0.64449	0.70687
cd00296	253.361	30910	122	219	0.98	0.67594	0.65087	0.73009	0.67286	0.64481	0.6478
cd12144	132.241	7670	58	114	1.3	0.67678	0.85178	0.84391	0.83681	0.80704	0.844
cd00063	113.78	84425	742	93	0.61	0.67762	0.47472	0.58213	0.56019	0.15551	0.64061
cd11380	160.471	21824	136	138	1.47	0.67856	0.75813	0.85278	0.82357	0.83322	0.80863
cd00056	180.823	25496	141	154	0.86	0.6794	0.70922	0.71757	0.71715	0.65562	0.68982
cd00030	135.623	70931	523	102	0.65	0.68308	0.43886	0.47902	0.57811	0.5513	0.59192
cd11375	204.621	21076	103	173	1	0.68497	0.70854	0.71139	0.72034	0.67089	0.71797
cd08168	108.631	11189	103	87	0.94	0.68574	0.70921	0.7402	0.67138	0.3912	0.63263
cd03493	114.89	37569	327	98	0.54	0.69199	0.59433	0.64491	0.57593	0.67444	0.45796
cd02439	334.522	53858	161	315	1.1	0.6934	0.80332	0.79921	0.831	0.83116	0.83714
cd10316	112.016	6945	62	92	1.16	0.69355	0.7862	0.76909	0.77004	0.67023	0.67304
cd00352	259.644	165653	638	220	0.78	0.69366	0.61435	0.67497	0.6057	0.59509	0.63671
cd05709	283.614	117416	414	202	0.76	0.69407	0.57292	0.54494	0.67868	0.70176	0.52745
cd00421	178.728	26273	147	152	1	0.69409	0.75715	0.75829	0.74975	0.68061	0.69542
cd00143	299.116	41278	138	257	0.82	0.69452	0.64971	0.66524	0.7469	0.61575	0.65828
cd00024	77.5656	9463	122	55	0.85	0.69595	0.66949	0.65011	0.74948	0.57276	0.6698
cd00173	100.639	35425	352	78	0.75	0.69629	0.55676	0.5442	0.74108	0.58643	0.71058
cd00121	148.507	52423	353	126	0.67	0.69673	0.54154	0.6019	0.54649	0.4957	0.661
cd00185	108.57	12377	114	85	0.82	0.69684	0.67079	0.66264	0.72299	0.53832	0.71232
cd00501	212	12084	57	195	1.21	0.70031	0.7407	0.73646	0.72345	0.72793	0.72343
cd00088	109.875	9669	88	97	0.78	0.70087	0.79699	0.72086	0.80032	0.67268	0.71497
cd00179	170.114	11908	70	152	1.23	0.70113	0.83912	0.74445	0.86905	0.86614	0.81705
cd06222	145.905	12256	84	121	0.85	0.70176	0.70596	0.70501	0.69734	0.68422	0.60061
cd00037	139.467	118965	853	115	0.69	0.70255	0.57325	0.5835	0.57935	0.43649	0.63954
cd00316	436.974	67294	154	403	0.86	0.70257	0.71262	0.69837	0.7337	0.7323	0.70247
cd00305	159.941	10876	68	144	1.21	0.70313	0.75173	0.7555	0.74756	0.71212	0.73575
cd00161	142.181	14929	105	123	0.76	0.70353	0.61566	0.57046	0.63886	0.22339	0.62165
cd06260	174.941	64728	370	155	0.67	0.7059	0.62497	0.68533	0.67282	0.55324	0.64815
cd00090	97.743	17496	179	77	0.71	0.70632	0.64096	0.69478	0.75064	0.62736	0.75941
cd00594	303.992	39215	129	270	0.81	0.7065	0.71465	0.72378	0.7212	0.6795	0.67492
cd03440	126.559	233627	1846	100	0.44	0.7072	0.44229	0.31243	0.30871	0.001	0.37041
cd00588	152.792	8098	53	135	0.85	0.70849	0.78972	0.76499	0.7819	0.73542	0.73692
cd07980	157.688	12615	80	123	0.97	0.70858	0.79937	0.73631	0.78261	0.683	0.57564
cd04371	104.984	20262	193	81	0.81	0.71087	0.70146	0.66349	0.73254	0.69695	0.76822
cd06224	152.333	13710	90	122	0.72	0.71333	0.74291	0.57987	0.71316	0.56383	0.65097
cd00165	91.6704	24476	267	74	0.72	0.71384	0.76788	0.73595	0.73857	0.6918	0.69625
cd00181	149.918	9145	61	128	0.68	0.71447	0.77955	0.7442	0.79566	0.67335	0.7242
cd00567	389.1	27237	70	370	0.87	0.71486	0.77071	0.77148	0.74377	0.73475	0.7295
cd00064	73.0438	11687	160	49	0.84	0.71521	0.61208	0.59034	0.7278	0.08022	0.7014
cd06259	172.915	77639	449	151	0.74	0.71788	0.68789	0.75017	0.70304	0.64965	0.72555
cd01342	107.481	99635	927	83	0.61	0.71834	0.59218	0.69933	0.60827	0.6683	0.63367
cd14798	136.891	13826	101	124	0.89	0.71864	0.73428	0.74478	0.80973	0.78253	0.72426
cd09233	392.857	22000	56	356	0.97	0.72093	0.8328	0.79976	0.79381	0.71994	0.7466
cd00403	228.38	48645	213	206	0.93	0.72183	0.7179	0.75675	0.73218	0.69181	0.71954
cd02775	125.805	49064	390	101	0.74	0.72204	0.67413	0.64956	0.67546	0.65109	0.6803
cd00176	241.497	40813	169	213	0.54	0.7224	0.56539	0.13211	0.73106	0.01778	0.52801
cd07440	148.397	8607	58	113	0.87	0.72252	0.76582	0.70684	0.68556	0.66301	0.73463
cd03333	279.605	93388	334	251	0.95	0.72359	0.7738	0.80297	0.7375	0.73471	0.73488
cd03127	115.991	13107	113	90	0.79	0.72427	0.72636	0.70791	0.82048	0.63416	0.73714
cd07177	122.031	43687	358	104	0.57	0.72654	0.67331	0.71004	0.67134	0.54038	0.67424
cd07066	141.619	18977	134	118	0.92	0.7269	0.65824	0.75035	0.74133	0.61149	0.72778
cd00075	130.506	63165	484	104	0.79	0.73109	0.66743	0.69731	0.71863	0.57238	0.7066
cd06587	132.4	42368	320	113	0.62	0.73271	0.5054	0.64161	0.68703	0.59147	0.60868
cd06462	126.165	100427	796	85	0.76	0.73312	0.55468	0.63533	0.58304	0.5063	0.53952
cd00379	175.83	39386	224	155	0.82	0.73323	0.73832	0.79296	0.78645	0.74768	0.75282
cd06661	123.116	27578	224	99	0.76	0.73362	0.54701	0.65285	0.68156	0.51813	0.68512
cd00133	102.323	46557	455	85	0.66	0.73454	0.57326	0.62986	0.61642	0.47956	0.54702
cd00317	175.598	16155	92	146	1.09	0.73476	0.77511	0.71996	0.69186	0.66287	0.69735
cd00164	84.6147	9223	109	65	0.86	0.73632	0.67815	0.7382	0.76092	0.71178	0.73302
cd02205	136.062	58915	433	113	0.59	0.73681	0.51036	0.35822	0.7085	0.29783	0.66583
cd05992	101.468	15626	154	81	0.75	0.73727	0.74118	0.66004	0.69774	0.57198	0.76087
cd13777	153.189	18689	122	128	0.97	0.73843	0.72433	0.73689	0.72301	0.64081	0.70404
cd06550	277.696	21938	79	261	0.8	0.7397	0.79881	0.82393	0.86929	0.78789	0.72203
cd06845	168.195	14633	87	144	0.87	0.7424	0.80773	0.76907	0.77157	0.7521	0.70759
cd00995	503.442	178722	355	464	0.72	0.74623	0.63138	0.65638	0.71044	0.71749	0.67192
cd02116	80.222	130441	1626	60	0.54	0.7483	0.5611	0.56621	0.60263	0.5813	0.59481
cd01610	146.303	91732	627	120	0.58	0.74833	0.47627	0.64078	0.56454	0.71226	0.61171
cd00568	192.662	25624	133	168	0.88	0.74885	0.70861	0.70627	0.76789	0.73865	0.73826
cd09727	221.294	11286	51	210	1.06	0.7498	0.81974	0.78049	0.77498	0.66713	0.70152
cd02325	80.1689	24211	302	60	0.81	0.75076	0.81351	0.77725	0.86406	0.64856	0.73124
cd02062	180.811	13380	74	158	0.86	0.75324	0.83838	0.81805	0.76316	0.70558	0.75416
cd14947	134.247	26581	198	113	1.01	0.75509	0.74524	0.78542	0.78803	0.74396	0.77202
cd00537	291.177	23003	79	274	1.04	0.75549	0.80707	0.80105	0.79677	0.75559	0.78016
cd10315	122.074	13184	108	100	0.94	0.76248	0.70973	0.72386	0.75027	0.70255	0.72776
cd11684	435.203	32205	74	392	0.91	0.76274	0.84684	0.81128	0.81244	0.80074	0.80264
cd00338	156.194	28115	180	137	0.78	0.76376	0.71375	0.76327	0.78076	0.67375	0.75103
cd00382	175.976	28860	164	159	0.99	0.76462	0.76935	0.80921	0.78865	0.74918	0.752
cd15489	68.5838	13511	197	47	0.78	0.76498	0.5901	0.74981	0.69267	0.51871	0.72538
cd06071	291.443	20401	70	277	1.35	0.76806	0.83798	0.84638	0.82024	0.80469	0.80736
cd00504	171.247	12501	73	156	1.27	0.76977	0.88189	0.87726	0.86236	0.78015	0.84668
cd00326	243.955	43180	177	227	1.07	0.77066	0.77019	0.72975	0.79073	0.66538	0.77179
cd00449	283.358	26919	95	255	0.97	0.7707	0.82931	0.80151	0.77833	0.64729	0.77404
cd00160	204.478	13700	67	180	0.85	0.77071	0.83116	0.80576	0.79106	0.7335	0.78868
cd00577	267.772	21154	79	249	0.89	0.77136	0.77928	0.73097	0.75859	0.68975	0.76105
cd00657	149.383	19868	133	126	0.63	0.77151	0.71799	0.61788	0.80033	0.5841	0.70537
cd09030	114.699	8373	73	102	0.93	0.77304	0.76183	0.77482	0.77901	0.68529	0.759
cd06093	128.889	26680	207	106	0.69	0.77312	0.63027	0.70432	0.75349	0.61729	0.77701
cd00640	320.846	102350	319	289	0.81	0.77331	0.72215	0.75452	0.70908	0.6589	0.71045
cd06578	254.031	105677	416	240	0.67	0.77346	0.68743	0.72975	0.70593	0.64704	0.72307
cd00186	463.317	29189	63	417	1.06	0.77356	0.84044	0.79024	0.79054	0.80966	0.78344
cd00159	193.63	35047	181	169	0.76	0.77553	0.65861	0.77652	0.76311	0.68889	0.7824
cd14251	394.13	27195	69	370	1.21	0.77623	0.83469	0.82461	0.81505	0.81282	0.80023
cd06971	159.845	26854	168	143	1.02	0.77672	0.70491	0.79603	0.79493	0.75437	0.72613
cd06157	190.93	10883	57	166	0.79	0.77722	0.80152	0.83512	0.78842	0.81267	0.75818
cd00115	150.11	10958	73	141	1.1	0.77765	0.83595	0.83289	0.84664	0.78575	0.80463
cd00386	202.288	34389	170	186	0.98	0.77797	0.77812	0.82513	0.81372	0.81917	0.81971
cd00117	98.75	7900	80	81	1.03	0.78052	0.88566	0.82942	0.80154	0.67125	0.78884
cd06583	154.31	44750	290	125	0.86	0.78111	0.71025	0.75146	0.68576	0.64182	0.58165
cd00222	112.361	13708	122	92	1.08	0.78151	0.79578	0.78067	0.83471	0.71982	0.81499
cd04369	123.323	34407	279	99	0.77	0.78173	0.66845	0.71551	0.79228	0.68594	0.76237
cd07995	223.432	59433	266	208	0.88	0.78238	0.72517	0.7603	0.76243	0.66955	0.74594
cd00178	186.75	9711	52	172	1.09	0.78242	0.8599	0.81761	0.79016	0.62732	0.77305
cd00433	490.857	96208	196	469	1.05	0.78329	0.76239	0.7902	0.78722	0.74636	0.76801
cd14473	121.21	37575	310	99	0.77	0.78401	0.78917	0.82443	0.76459	0.69914	0.71205
cd00187	473.052	27437	58	444	1.46	0.78486	0.92472	0.92401	0.9193	0.8768	0.88987
cd00590	92.1125	43385	471	72	0.69	0.78607	0.62024	0.5442	0.75487	0.67672	0.73994
cd00431	180.824	36888	204	162	0.81	0.78785	0.73882	0.73977	0.78691	0.77688	0.76694
cd00041	134.105	39561	295	112	0.84	0.78845	0.67445	0.66406	0.79331	0.51942	0.78684
cd15481	218.667	15088	69	195	0.94	0.79078	0.82402	0.82988	0.79885	0.78345	0.75713
cd10147	161.555	52667	326	145	0.63	0.79143	0.60288	0.69514	0.72733	0.66307	0.69172
cd15802	93.8197	5723	61	74	1.35	0.79152	0.88126	0.85455	0.85625	0.80183	0.83955
cd00053	57.2445	49402	863	35	0.93	0.79209	0.68022	0.72624	0.69303	0.46212	0.78034
cd00400	410.708	46410	113	385	0.83	0.79298	0.78386	0.80006	0.81303	0.82241	0.78351
cd00593	166.909	33048	198	133	0.92	0.79333	0.78024	0.77904	0.81225	0.75531	0.78293
cd12927	118.333	18460	156	103	0.88	0.79437	0.78171	0.85783	0.83279	0.76353	0.7983
cd00048	85.1032	13191	155	68	0.89	0.79551	0.78099	0.75719	0.86054	0.60858	0.79298
cd09634	326.972	46430	142	318	0.94	0.79694	0.84043	0.86402	0.83662	0.79364	0.81924
cd00038	134.73	39476	293	115	0.64	0.79796	0.72546	0.73582	0.83279	0.8067	0.83194
cd00191	84.4884	7266	86	66	1.12	0.79837	0.91703	0.88822	0.83471	0.64874	0.74527
cd00432	126.625	17221	136	103	1.05	0.79901	0.812	0.77142	0.75254	0.83345	0.75832
cd11655	84.8143	5937	70	57	1.1	0.79957	0.84374	0.72058	0.76111	0.80823	0.73132
cd06534	445.515	30295	68	427	1.02	0.80006	0.82641	0.82721	0.80671	0.79027	0.78685
cd06664	138.193	28606	207	122	1.05	0.80078	0.80394	0.84118	0.82795	0.82915	0.82597
cd00158	110.112	34355	312	89	0.83	0.80278	0.69314	0.73807	0.76852	0.73346	0.78308
cd04332	154.929	76690	495	136	0.74	0.80386	0.77747	0.82061	0.75095	0.76969	0.77162
cd03174	287.627	283025	984	265	0.92	0.80498	0.78169	0.77945	0.75817	0.76369	0.77128
cd12843	120.397	6983	58	106	1.08	0.80565	0.8535	0.83925	0.84749	0.7778	0.83539
cd00195	162.62	11546	71	141	1.15	0.80851	0.82115	0.80701	0.81898	0.75418	0.81627
cd00073	107.127	7606	71	89	1.31	0.80882	0.85057	0.85729	0.88021	0.77967	0.84407
cd00351	243.214	17025	70	219	1.4	0.81118	0.86822	0.83638	0.82818	0.82162	0.82682
cd14785	388.5	39627	102	371	1.09	0.8116	0.82349	0.83035	0.83017	0.7959	0.82574
cd12870	78.0278	5618	72	66	1.01	0.81251	0.80815	0.74417	0.7308	0.76143	0.71226
cd00212	91.9775	8186	89	78	1.14	0.81485	0.83374	0.83837	0.80316	0.80198	0.81675
cd01433	135.538	21144	156	112	1.16	0.81569	0.74084	0.83782	0.79019	0.80695	0.78378
cd00010	83.6119	5602	67	63	0.99	0.81585	0.82547	0.86039	0.80822	0.74394	0.75915
cd04301	88.3772	83870	949	65	0.6	0.81623	0.51531	0.57664	0.47859	0.61079	0.67181
cd07025	308.235	62880	204	281	0.94	0.81623	0.78692	0.82449	0.81125	0.81827	0.7931
cd09281	140.021	27024	193	123	1.2	0.81648	0.84495	0.87228	0.86732	0.85198	0.85332
cd11378	130.605	9926	76	113	0.98	0.81854	0.86675	0.82556	0.85241	0.724	0.83202
cd00055	71.934	22875	318	50	0.98	0.82142	0.82901	0.79714	0.81816	0.10162	0.80726
cd00298	102.636	117723	1147	85	0.71	0.82162	0.69588	0.6868	0.59364	0.70775	0.77452
cd00392	128.421	17080	133	114	1.3	0.82181	0.8384	0.86073	0.91187	0.87272	0.86695
cd07765	59.1842	6747	114	40	1.15	0.82256	0.82925	0.84233	0.8559	0.82574	0.84075
cd00387	134.86	17397	129	125	1.14	0.82316	0.84191	0.83051	0.83567	0.82659	0.82421
cd11377	157.543	11028	70	138	0.88	0.82339	0.84782	0.81793	0.82268	0.83347	0.82649
cd06660	307.192	352964	1149	286	0.84	0.82694	0.75022	0.77809	0.68429	0.76166	0.78513
cd14948	105.4	99287	942	83	0.71	0.83043	0.61402	0.58668	0.6247	0.29076	0.78314
cd15457	170.759	133875	784	152	1.08	0.83207	0.76194	0.78855	0.79894	0.77919	0.80113
cd00190	246.787	43928	178	232	1.07	0.83263	0.79548	0.85572	0.8325	0.7739	0.78421
cd00172	383.837	35313	92	364	0.96	0.83768	0.88838	0.85815	0.84639	0.78437	0.82916
cd14745	386.373	19705	51	329	1.3	0.83782	0.89616	0.84508	0.86967	0.81678	0.82707
cd00014	127.074	6862	54	107	0.88	0.83822	0.86529	0.78354	0.82153	0.4312	0.7164
cd07828	176.465	12529	71	148	1.12	0.83885	0.85737	0.83152	0.82331	0.74017	0.7349
cd00054	60.0018	33781	563	40	1.06	0.839	0.78692	0.44243	0.79525	0.42177	0.84657
cd00211	152.455	16770	110	136	0.89	0.83952	0.83814	0.85052	0.83615	0.77608	0.82673
cd12151	291.314	60302	207	282	0.96	0.84221	0.80674	0.86292	0.82307	0.83616	0.80953
cd00107	50.5686	2579	51	33	1.04	0.84481	0.9033	0.7523	0.84343	0.80766	0.79029
cd09487	74.8544	7710	103	56	0.84	0.84501	0.77954	0.76188	0.84217	0.73978	0.80533
cd00105	86.3953	47863	554	64	0.76	0.84548	0.75563	0.78344	0.8409	0.59084	0.81027
cd00032	261.585	13864	53	244	1.26	0.84637	0.90176	0.91803	0.89553	0.85299	0.85572
cd00162	66.5198	36985	556	45	0.92	0.84649	0.65973	0.81535	0.75732	0.51663	0.77198
cd00065	76.2398	29886	392	52	0.84	0.84837	0.708	0.78243	0.77084	0.64951	0.78819
cd12152	135.527	44453	328	123	0.84	0.84914	0.8151	0.80831	0.83727	0.80841	0.80798
cd00104	60.6447	16556	273	41	1.04	0.84947	0.8047	0.76594	0.77667	0.72645	0.76053
cd00448	126.281	107718	853	107	0.87	0.84963	0.7299	0.76265	0.73383	0.72141	0.72545
cd00127	158.865	8261	52	139	1.14	0.84972	0.88975	0.85355	0.86043	0.81755	0.83621
cd00562	118.384	13259	112	102	0.84	0.85107	0.73975	0.86752	0.77425	0.77902	0.8439
cd00083	80.3425	11730	146	60	0.81	0.85258	0.82471	0.89129	0.95825	0.7132	0.89661
cd10146	86.8438	19453	224	69	0.97	0.85343	0.84648	0.77975	0.83289	0.72408	0.84616
cd00033	78.0694	22484	288	57	0.85	0.85397	0.72049	0.7632	0.78197	0.13668	0.78867
cd06558	214.288	149359	697	195	0.77	0.85451	0.72276	0.77474	0.81301	0.82396	0.79785
cd08044	153.897	10465	68	133	0.99	0.85555	0.87472	0.86501	0.91383	0.87551	0.8557
cd00111	63.48	3174	50	44	1.28	0.85597	0.93645	0.93376	0.93736	0.88522	0.85519
cd06559	228.451	27871	122	208	1.21	0.85618	0.85038	0.83987	0.86685	0.82841	0.81976
cd00156	130.987	40344	308	113	0.83	0.85655	0.7789	0.8178	0.85027	0.81662	0.8132
cd00070	148.185	13633	92	127	1	0.86167	0.88702	0.89176	0.88232	0.805	0.85438
cd00209	175.016	22402	128	157	1.18	0.86186	0.79274	0.79169	0.83408	0.75605	0.81143
cd05466	214.222	75192	351	197	0.69	0.86303	0.73946	0.81253	0.86802	0.84563	0.83736
cd00518	156.131	31070	199	140	0.85	0.86327	0.80014	0.86186	0.85167	0.75392	0.84694
cd00082	84.8901	39389	464	65	0.72	0.86427	0.74873	0.88247	0.87323	0.83735	0.7997
cd10719	83.5856	31261	374	65	1.08	0.86698	0.86905	0.90046	0.88339	0.91567	0.90804
cd08010	268.612	17997	67	246	1.21	0.86731	0.90752	0.90084	0.86712	0.8608	0.84931
cd01425	213.924	36581	171	211	1.2	0.86737	0.92418	0.94715	0.92601	0.92142	0.91809
cd00321	184.152	19336	105	159	1.18	0.868	0.87599	0.88002	0.87818	0.83879	0.87911
cd06911	107.659	14857	138	86	1.02	0.86845	0.82687	0.81976	0.86546	0.73954	0.8587
cd10747	239.651	104488	436	222	1.06	0.86911	0.84483	0.86277	0.8445	0.866	0.85479
cd00087	234.793	13618	58	215	1.41	0.87029	0.91256	0.93222	0.91515	0.84988	0.88166
cd08768	105.197	6417	61	87	0.96	0.87136	0.92325	0.92191	0.93325	0.83913	0.90859
cd14458	125.143	7884	63	105	1.2	0.87204	0.92764	0.9012	0.89284	0.89858	0.88759
cd00043	111.119	36558	329	89	0.67	0.87305	0.75951	0.75979	0.69889	0.45412	0.76052
cd00641	215.055	23656	110	193	1.41	0.87595	0.87982	0.88603	0.88866	0.86342	0.88221
cd02696	207.635	108593	523	174	1	0.87703	0.805	0.81369	0.83578	0.7812	0.79278
cd00093	75.5215	42141	558	58	0.7	0.87726	0.7232	0.74365	0.86591	0.7994	0.8497
cd07153	133.505	49397	370	116	0.95	0.87852	0.84801	0.87108	0.87717	0.80168	0.86533
cd04100	105.352	22124	210	87	1	0.87867	0.87523	0.89141	0.85895	0.82397	0.88725
cd00047	261.225	26645	102	231	1.21	0.87968	0.8388	0.83587	0.87894	0.80007	0.85596
cd00118	63.9441	153402	2399	45	0.93	0.88163	0.77759	0.75198	0.63755	0.001	0.85743
cd07185	125.79	131702	1047	106	0.93	0.88214	0.80194	0.77796	0.78575	0.79108	0.81345
cd02153	116.497	18756	161	98	1.09	0.88387	0.82995	0.87287	0.87574	0.71895	0.88097
cd08368	72.2513	28756	398	53	0.97	0.88416	0.81484	0.85191	0.82621	0.64274	0.84729
cd07323	97.5323	6047	62	75	1.21	0.88738	0.91506	0.90443	0.88386	0.8488	0.86296
cd00201	50.163	6772	135	31	1.16	0.88821	0.91535	0.95413	0.93333	0.84948	0.93713
cd06225	68.7902	14102	205	48	0.75	0.88862	0.77697	0.80045	0.89048	0.84037	0.8719
cd10148	91.4478	12254	134	80	1.15	0.89295	0.91131	0.92218	0.90237	0.84061	0.90266
cd00069	113.021	16275	144	95	1.3	0.8954	0.91246	0.85248	0.90991	0.78083	0.93444
cd00021	59.8036	3349	56	39	1.12	0.89554	0.93389	0.88815	0.95234	0.51291	0.90575
cd00487	160.128	24980	156	140	1.23	0.89668	0.89357	0.90357	0.88141	0.84642	0.87256
cd14660	123.629	11992	97	105	1.2	0.89715	0.95802	0.93912	0.95034	0.8843	0.91637
cd06445	95.847	36326	379	79	1.18	0.89727	0.90009	0.87292	0.89308	0.76845	0.90306
cd00291	79.456	15335	193	69	0.95	0.89775	0.87693	0.88919	0.9052	0.82832	0.87004
cd00067	55.3782	6590	119	36	1.03	0.8983	0.88998	0.95027	0.93434	0.81645	0.9295
cd00140	374.929	41992	112	365	0.98	0.90146	0.89511	0.89086	0.91347	0.85094	0.8858
cd06257	74.487	11471	154	55	1.2	0.90149	0.88204	0.93662	0.91138	0.85757	0.90538
cd00213	98.4593	13292	135	88	1.2	0.90162	0.949	0.93738	0.94676	0.92034	0.9444
cd00174	69.7524	36062	517	51	1.02	0.90182	0.77258	0.80407	0.84991	0.80389	0.89011
cd00029	69.26	3463	50	50	1.01	0.90223	0.93467	0.91761	0.91197	0.8674	0.8967
cd07557	123.208	36100	293	91	1	0.90228	0.84509	0.85483	0.84747	0.85723	0.84732
cd09725	91.8926	11119	121	79	1.19	0.90248	0.89364	0.90041	0.89885	0.82402	0.86276
cd08048	119.82	5991	50	84	1.49	0.9033	0.91286	0.89817	0.92534	0.93282	0.91393
cd04508	67.6504	23610	349	48	0.96	0.90374	0.82324	0.86809	0.84769	0.76781	0.90947
cd08774	241.18	24118	100	225	1.28	0.90503	0.9149	0.93435	0.92354	0.90053	0.90172
cd12962	113.841	7855	69	95	1.35	0.90536	0.89719	0.90825	0.90965	0.74082	0.91152
cd11572	118.975	28316	238	99	1.08	0.90544	0.86405	0.88345	0.90108	0.81521	0.90306
cd00462	186.344	28697	154	171	1.25	0.90662	0.89036	0.91036	0.91077	0.90355	0.90049
cd00015	202.25	12135	60	185	1.06	0.90736	0.94648	0.96043	0.94645	0.91442	0.93758
cd03587	54.5192	8505	156	41	1.14	0.91018	0.91353	0.94962	0.92265	0.93697	0.88171
cd11308	96.2	7215	75	76	1.34	0.9102	0.93453	0.89457	0.90636	0.80849	0.92292
cd00052	86.7414	5031	58	67	1.17	0.91132	0.93152	0.94183	0.93943	0.90301	0.94478
cd00051	82.7333	8687	105	63	0.97	0.91197	0.80499	0.56362	0.80439	0.61487	0.79143
cd00119	133.431	6805	51	124	1.59	0.91263	0.94207	0.9278	0.91031	0.86142	0.9188
cd01614	90.4429	6331	70	83	1.23	0.91304	0.94296	0.93313	0.92287	0.86669	0.91371
cd00383	108.996	57114	524	94	1	0.9137	0.88313	0.90711	0.90988	0.90731	0.91182
cd00084	85.1244	16429	193	66	0.92	0.91374	0.89827	0.94002	0.93134	0.9173	0.93568
cd00167	67.462	11536	171	45	0.89	0.91525	0.8379	0.74841	0.9232	0.42546	0.87747
cd01392	69.537	94014	1352	52	1.07	0.91637	0.88977	0.92357	0.91243	0.95105	0.88778
cd00412	181.209	16490	91	155	1.41	0.91684	0.92361	0.92684	0.92453	0.82087	0.9047
cd00495	104.935	47011	448	90	1.01	0.91742	0.88124	0.8756	0.90796	0.83885	0.90578
cd00371	79.2453	8400	106	63	1.02	0.91946	0.91383	0.89421	0.90571	0.79656	0.93743
cd11660	67.4526	6408	95	50	1.33	0.91954	0.98608	0.97959	0.9216	0.95022	0.94379
cd00580	121.17	6422	53	113	1.17	0.92046	0.97686	0.95351	0.97079	0.92752	0.95027
cd12212	133.089	7453	56	115	1.31	0.92162	0.93647	0.9388	0.94052	0.87272	0.9272
cd11586	66.15	3969	60	54	0.86	0.92278	0.94729	0.97802	0.9939	0.95738	0.9437
cd15832	292.49	14917	51	279	1.28	0.9233	0.95699	0.94937	0.953	0.8431	0.94215
cd07304	363.632	52363	144	344	1.39	0.9254	0.92417	0.94335	0.92157	0.93888	0.92217
cd00336	130.414	17345	133	105	1.11	0.92556	0.91927	0.93099	0.93395	0.92785	0.92759
cd09916	114.425	8353	73	96	0.88	0.9262	0.95954	0.95121	0.96533	0.86519	0.93529
cd00320	100.806	9879	98	93	1.21	0.92649	0.95695	0.9383	0.92816	0.86779	0.92252
cd13433	74.5342	5441	73	54	1.41	0.92674	0.93673	0.82651	0.92358	0.81146	0.90931
cd00446	151.901	22937	151	136	1.12	0.92792	0.93911	0.9512	0.95923	0.93846	0.9304
cd00112	56.4788	31967	566	35	1.17	0.92959	0.84729	0.82985	0.90653	0.57597	0.92033
cd00349	146.848	20265	138	131	1.32	0.93151	0.92847	0.91544	0.90944	0.89524	0.92681
cd06572	409.113	79368	194	390	1.35	0.933	0.92788	0.93476	0.93527	0.93259	0.93453
cd00350	51.5479	3763	73	36	1.38	0.93423	0.92895	0.94889	0.88003	0.91225	0.85666
cd00552	105.545	15093	143	91	1.04	0.93724	0.93026	0.90927	0.91317	0.84147	0.8952
cd00756	142.89	20719	145	124	1.2	0.93885	0.91447	0.90207	0.94301	0.87759	0.9281
cd00483	145.894	15173	104	128	1.31	0.93896	0.94501	0.93552	0.94581	0.92141	0.92745
cd00022	89.2154	5799	65	69	1.27	0.93942	0.9688	0.96081	0.95671	0.86039	0.94825
cd00367	91.7227	10915	119	77	1.08	0.94208	0.93008	0.93791	0.94116	0.93017	0.94266
cd06571	104.589	20604	197	90	1.08	0.94248	0.9303	0.93812	0.96464	0.77125	0.956
cd13944	294.603	95746	325	275	1.2	0.94285	0.9223	0.91461	0.92544	0.88264	0.91831
cd00086	79.1887	25182	318	59	0.91	0.94356	0.82866	0.90164	0.97703	0.89411	0.91623
cd02407	123.158	7020	57	115	1.41	0.94613	0.93371	0.91975	0.91583	0.92235	0.92507
cd08026	114.061	11178	98	102	1.1	0.94664	0.96943	0.96176	0.95233	0.95921	0.95373
cd09804	144.891	7969	55	121	1.28	0.94675	0.97489	0.96595	0.95014	0.91579	0.93761
cd00109	70.4894	6626	94	54	1.24	0.94704	0.96942	0.96081	0.95818	0.95041	0.95323
cd14438	55.1731	2869	52	41	1.4	0.94942	0.9725	0.98648	0.98216	0.97522	0.96581
cd00475	237.733	159519	671	219	1.34	0.95006	0.93525	0.93096	0.94204	0.95232	0.94816
cd07377	83.9279	34914	416	66	1.01	0.95187	0.93524	0.97965	0.98193	0.85867	0.9844
cd00488	90.5133	10228	113	76	1.3	0.95395	0.97356	0.96471	0.96267	0.92114	0.96122
cd00633	81.0545	4458	55	67	1.03	0.95758	0.98904	0.96521	0.97349	0.66832	0.96178
cd00652	188.81	11895	63	173	1.56	0.95762	0.96768	0.97308	0.96957	0.9301	0.95929
cd06919	119.898	7074	59	111	1.62	0.9607	0.97739	0.97912	0.97493	0.94297	0.96757
cd00528	154.519	8344	54	136	1.54	0.96349	0.98477	0.98652	0.98209	0.96744	0.97271
cd01514	100.061	36122	361	79	1.02	0.96367	0.94589	0.93293	0.94843	0.96122	0.94607
cd00591	94.8947	5409	57	85	1.19	0.96602	0.96466	0.94358	0.96274	0.93234	0.95779
cd00513	123.875	6937	56	107	1.59	0.96617	0.97965	0.96972	0.98066	0.97192	0.96984
cd00427	68.6264	11941	174	57	1.06	0.96672	0.98235	0.98787	0.94776	0.94595	0.94111
cd00473	100.438	51424	512	91	1.04	0.96712	0.93873	0.94068	0.9555	0.858	0.95015
cd12208	154.425	12354	80	150	1.25	0.96754	0.9741	0.97568	0.97762	0.97163	0.968
cd14263	122.525	12375	101	106	1.12	0.96869	0.9812	0.99128	0.9873	0.96669	0.97443
cd00554	163.93	18852	115	153	1.43	0.97026	0.97184	0.96831	0.97285	0.94835	0.96581
cd11740	162.809	82544	507	159	1.47	0.97158	0.95214	0.95827	0.96328	0.95095	0.94444
cd00361	246.167	14770	60	221	1.56	0.97197	0.98036	0.97987	0.96597	0.97487	0.97169
cd00384	326.622	24170	74	314	1.75	0.97357	0.97758	0.98242	0.97672	0.97296	0.97241
cd00472	64.1507	4683	73	54	1.59	0.97421	0.97775	0.9832	0.97178	0.99139	0.97666
cd07914	196.824	27949	142	191	1.56	0.97541	0.97227	0.96646	0.97618	0.94795	0.96484
cd00003	245.906	13033	53	234	1.51	0.97688	0.9839	0.97692	0.97442	0.97175	0.9734
cd07026	118.276	12419	105	106	1.4	0.97715	0.98721	0.98881	0.98728	0.98637	0.98391
cd09294	135.169	26358	195	116	1.53	0.9785	0.96182	0.97818	0.96868	0.97493	0.97271
cd00466	148.367	13353	90	140	1.59	0.97985	0.9899	0.98409	0.98439	0.96335	0.97181
cd12935	54.3143	3802	70	36	1.29	0.9801	0.9866	0.95031	0.9489	0.89102	0.929
cd06916	90.4407	5336	59	72	1.67	0.98225	0.98995	0.98254	0.98789	0.98238	0.98156
cd12934	55.0429	3853	70	37	1.24	0.98325	0.99313	0.99468	0.99468	0.95079	0.99468
cd00569	58.9286	14850	252	42	1.14	0.98787	0.96492	0.98056	0.97929	0.96518	0.96025
cd00355	66.069	11496	174	53	1.14	0.99137	0.99655	0.99507	0.99591	0.99054	0.94915
cd06171	74.5205	5440	73	55	1.01	0.99504	0.99041	0.95621	0.95124	0.98044	0.96186
