# Supplementary material for: Bayesian Top-Down Protein Sequence Alignment with Inferred Position-Specific Gap Penalties
Source: PLoS Comput Biol. 2016 May 18;12(5):e1004936. doi: 10.1371/journal.pcbi.1004936 (PMC4871425; doi:10.1371/journal.pcbi.1004936)
Supplement: S3 Charts — (XLSX) [file pcbi.1004936.s006.xlsx]

## Sheet: data
cdd_id	ave_len	nres	num_sq	cols	RE	G0cols	GISMO0	G1cols	GISMO1	G2cols	GISMO2	G3cols	GISMO3	G4cols	GISMO4	G5cols	GISMO5
cd00003	250.547	13279	53	234	1.51	237	0.97617	237	0.97939	237	0.98247	237	0.98088	237	0.98019	237	0.9794
cd00009	655.694	87863	134	150	0.62	139	0.28346	163	0.3609	159	0.36248	139	0.33619	139	0.35659	153	0.35946
cd00010	188.343	12619	67	63	1.03	106	0.82221	84	0.83135	87	0.81921	84	0.79693	102	0.80351	82	0.8225
cd00012	430.08	53760	125	303	0.44	92	0.1197	132	0.1708	139	0.16214	115	0.15256	76	0.08415	94	0.10842
cd00014	920.37	49700	54	107	0.9	109	0.3756	103	0.36147	109	0.38117	104	0.388	105	0.37661	102	0.36892
cd00015	681.183	40871	60	185	1.07	541	0.25469	573	0.25989	536	0.25436	549	0.25741	546	0.25653	546	0.2553
cd00021	551.5	30884	56	39	1.24	162	0.7128	133	0.70385	185	0.70543	186	0.70555	134	0.71037	124	0.71131
cd00022	475.892	30933	65	69	1.3	91	0.32515	85	0.32458	97	0.32908	96	0.33547	99	0.29642	98	0.3337
cd00024	1052.53	128409	122	55	0.91	88	0.47108	81	0.46417	84	0.45274	93	0.48028	61	0.43203	91	0.4805
cd00027	861.048	124852	145	72	0.66	75	0.31131	77	0.31745	83	0.30266	77	0.3131	87	0.30929	73	0.32541
cd00029	912.74	45637	50	50	1.18	59	0.65988	64	0.66253	61	0.66344	58	0.666	73	0.66281	61	0.63754
cd00030	824.784	431362	523	102	0.66	113	0.51558	110	0.51627	111	0.51666	111	0.50919	107	0.51837	107	0.51869
cd00032	389.094	20622	53	244	1.27	231	0.83877	246	0.84747	229	0.8388	234	0.83717	243	0.82215	246	0.84778
cd00033	812.219	233919	288	57	0.85	152	0.09382	178	0.08999	175	0.09541	153	0.09796	179	0.0876	169	0.09229
cd00037	924.444	788551	853	115	0.7	115	0.37323	108	0.37272	118	0.36917	115	0.36922	109	0.36623	136	0.38161
cd00038	524.799	153766	293	115	0.65	136	0.61082	122	0.62149	131	0.58094	118	0.55263	138	0.60562	130	0.62915
cd00041	1773.26	523113	295	112	0.85	130	0.1157	123	0.10978	117	0.114	138	0.11681	130	0.11739	122	0.12511
cd00042	208.113	11030	53	101	1.01	88	0.4936	87	0.5528	89	0.48497	82	0.47985	84	0.4373	88	0.51394
cd00043	409.523	134733	329	89	0.69	178	0.40417	172	0.33133	177	0.41068	156	0.32017	157	0.32875	180	0.40583
cd00046	979.428	224289	229	146	0.74	341	0.58821	351	0.61367	355	0.56675	359	0.62495	333	0.58945	338	0.59148
cd00047	907.069	92521	102	231	1.23	269	0.61551	266	0.6025	255	0.61213	269	0.61698	256	0.61971	271	0.61829
cd00048	571.574	88594	155	68	0.91	68	0.48103	70	0.48499	68	0.46539	71	0.46566	70	0.47229	71	0.48449
cd00051	282.8	29694	105	63	0.99	95	0.36432	68	0.41973	73	0.40063	70	0.42333	67	0.4124	68	0.46606
cd00052	844.172	48962	58	67	1.23	91	0.36925	90	0.35565	92	0.36602	95	0.35971	106	0.34486	96	0.36539
cd00055	2223.44	707055	318	50	1.09	286	0.02772	273	0.03041	278	0.0271	271	0.02632	300	0.0305	245	0.02942
cd00056	290.028	40894	141	154	0.86	167	0.70527	175	0.69818	168	0.69544	172	0.67681	169	0.70399	169	0.6902
cd00060	712.789	101216	142	102	0.75	80	0.50005	92	0.54052	85	0.52944	95	0.53268	94	0.53297	92	0.52803
cd00063	5295.95	3929593	742	93	0.62	274	0.04855	284	0.04351	225	0.04015	221	0.04318	287	0.04686	299	0.0482
cd00064	1210.89	193742	160	49	0.92	193	0.05499	207	0.04844	229	0.07137	221	0.04769	181	0.03965	205	0.04835
cd00065	816.788	320181	392	52	1.05	55	0.82583	57	0.79331	58	0.81526	56	0.81328	54	0.82214	54	0.81567
cd00067	714.563	85033	119	36	1.34	46	0.88248	45	0.90036	52	0.88466	50	0.89579	53	0.87959	50	0.89544
cd00069	147.736	21274	144	95	1.32	115	0.88248	111	0.85151	115	0.88216	114	0.87609	107	0.88454	116	0.86717
cd00070	297.707	27389	92	127	1.01	128	0.54357	126	0.52949	126	0.54321	130	0.55097	130	0.54522	129	0.53959
cd00073	229.789	16315	71	89	1.4	162	0.75786	143	0.75178	158	0.77469	155	0.79085	147	0.7765	151	0.79062
cd00075	646.349	312833	484	104	0.81	125	0.71562	129	0.73072	115	0.73116	131	0.72834	117	0.73868	123	0.70563
cd00077	450.613	111752	248	146	0.52	146	0.37851	144	0.40251	144	0.38558	149	0.3978	123	0.39639	134	0.39955
cd00079	784.008	102705	131	131	0.83	344	0.6197	346	0.69422	346	0.68954	343	0.69246	343	0.62556	352	0.65915
cd00080	664.472	305657	460	71	0.9	267	0.55004	253	0.51808	250	0.54384	259	0.51832	254	0.54335	250	0.49775
cd00081	898.449	70079	78	311	0.55	140	0.31782	136	0.41732	148	0.4006	149	0.30703	131	0.39474	134	0.40137
cd00082	641.8	297795	464	65	0.75	272	0.80459	233	0.78876	234	0.80019	230	0.80212	232	0.78768	233	0.79851
cd00083	385.74	56318	146	60	0.91	69	0.79635	80	0.80613	63	0.80258	63	0.78883	65	0.78679	66	0.8138
cd00084	454.668	87751	193	66	0.96	79	0.65623	81	0.65285	80	0.65307	87	0.6523	84	0.65702	82	0.65099
cd00085	312.869	38170	122	58	0.81	56	0.60814	52	0.57812	58	0.61372	57	0.60908	55	0.63603	53	0.61427
cd00086	487.836	155132	318	59	1.01	60	0.76662	67	0.74171	66	0.76103	65	0.71727	72	0.76978	67	0.76069
cd00087	563.983	32711	58	215	1.44	213	0.84905	226	0.85692	216	0.87072	213	0.85959	217	0.85399	211	0.85443
cd00088	836.011	73569	88	97	0.8	187	0.00282	223	0.00373	140	0.00308	233	0.00285	228	0.00381	221	0.00242
cd00090	198.078	35456	179	77	0.72	78	0.68799	71	0.6645	77	0.6829	78	0.68565	76	0.69643	80	0.6857
cd00093	202.231	112845	558	58	0.72	70	0.86482	70	0.8641	70	0.86528	70	0.86551	70	0.86453	69	0.86552
cd00096	1614.13	2960322	1834	72	0.55	149	0.1106	147	0.1101	133	0.10441	156	0.11359	143	0.10649	152	0.10782
cd00101	143.159	18897	132	82	0.86	54	0.57373	70	0.62783	46	0.57388	66	0.6224	56	0.62139	69	0.58227
cd00102	1463.68	207842	142	89	0.72	154	0.2196	114	0.23184	175	0.23011	121	0.2288	134	0.18153	150	0.18613
cd00104	625.077	170646	273	41	1.09	49	0.43739	55	0.4223	59	0.44197	48	0.41723	48	0.43312	46	0.39815
cd00105	740.726	410362	554	64	0.78	105	0.17222	117	0.17863	85	0.11418	129	0.1091	96	0.15293	95	0.16324
cd00107	70.2549	3583	51	33	1.08	37	0.7917	43	0.82328	36	0.78818	42	0.80529	44	0.82113	43	0.75316
cd00109	886.489	83330	94	54	1.29	54	0.30607	55	0.29383	56	0.24612	57	0.30792	55	0.30034	58	0.29298
cd00110	1992.74	227172	114	151	0.75	237	0.149	195	0.15091	213	0.14904	247	0.15313	252	0.1524	259	0.14992
cd00111	708.44	35422	50	44	1.42	82	0.37398	67	0.38163	80	0.34062	81	0.36951	55	0.34443	58	0.35796
cd00112	2333.33	1320665	566	35	1.27	54	0.01145	40	0.00821	25	0.00258	34	0.00686	56	0.01392	15	0.00193
cd00115	168.671	12313	73	141	1.1	127	0.78071	130	0.79193	128	0.78251	126	0.7605	127	0.74469	125	0.74978
cd00117	220.662	17653	80	81	1.06	77	0.40927	113	0.37741	86	0.41043	112	0.37777	99	0.41835	111	0.38476
cd00118	460.064	1103693	2399	45	0.95	51	0.37609	47	0.34405	51	0.34543	52	0.33362	46	0.3431	51	0.34102
cd00119	200.412	10221	51	124	1.6	118	0.81205	118	0.79162	117	0.80783	119	0.81525	118	0.80411	117	0.78253
cd00121	599.261	211539	353	126	0.68	131	0.46818	123	0.44476	132	0.47537	120	0.46046	122	0.46333	126	0.45035
cd00127	358.731	18654	52	139	1.17	140	0.8253	141	0.82858	141	0.84032	141	0.83803	143	0.82906	142	0.83177
cd00130	771.413	141940	184	103	0.42	85	0.15022	176	0.19775	193	0.1984	211	0.19209	197	0.19275	117	0.17733
cd00133	395.211	179821	455	85	0.68	88	0.60787	87	0.59839	87	0.6311	81	0.54658	87	0.59131	87	0.65289
cd00134	340.381	21444	63	219	0.81	218	0.64791	219	0.63697	221	0.63459	220	0.64562	218	0.6461	221	0.6383
cd00136	451.853	30726	68	70	0.77	74	0.4689	87	0.48817	76	0.46196	73	0.47575	72	0.45959	75	0.45749
cd00138	547.923	42738	78	119	0.64	81	0.18216	125	0.24758	117	0.2593	119	0.26457	123	0.24831	116	0.23398
cd00140	378.741	42419	112	365	0.98	361	0.90805	361	0.90244	362	0.90565	361	0.89632	361	0.90388	362	0.9027
cd00143	507.239	69999	138	257	0.83	217	0.66509	228	0.68217	229	0.69149	230	0.68122	229	0.69276	219	0.66699
cd00146	2157.34	153171	71	81	0.78	123	0.08287	146	0.09317	157	0.08687	132	0.08437	176	0.08938	150	0.09183
cd00156	388.727	119728	308	113	0.85	117	0.82744	124	0.82564	125	0.83573	125	0.8351	124	0.82406	124	0.82078
cd00158	255.282	79648	312	89	0.83	91	0.715	92	0.73912	91	0.73704	94	0.73375	93	0.72835	91	0.73256
cd00159	799.646	144736	181	169	0.79	186	0.76842	183	0.75602	189	0.76589	186	0.76702	195	0.76719	180	0.75682
cd00160	1097.66	73543	67	180	0.88	301	0.68317	283	0.71831	310	0.68954	316	0.69567	297	0.68885	316	0.68466
cd00161	577.2	60606	105	123	0.79	115	0.44386	117	0.45279	119	0.44482	117	0.40814	124	0.44989	95	0.21685
cd00162	538.016	299137	556	45	1.08	48	0.83886	57	0.82272	51	0.84375	52	0.83278	47	0.84043	46	0.83433
cd00164	735.477	80167	109	65	0.87	79	0.14141	85	0.28422	88	0.15799	73	0.11775	79	0.13225	85	0.25407
cd00165	282.007	75296	267	74	0.73	63	0.72347	63	0.72702	56	0.70634	57	0.72098	61	0.73086	55	0.73308
cd00167	625.602	106978	171	45	0.94	66	0.34474	64	0.35436	67	0.34445	54	0.33757	67	0.33037	62	0.34557
cd00170	535.555	58911	110	157	0.71	199	0.59651	226	0.6206	215	0.61444	175	0.61934	183	0.6253	191	0.61887
cd00172	424.793	39081	92	364	0.96	356	0.84272	357	0.84416	352	0.83421	359	0.83971	359	0.8365	358	0.84715
cd00173	742.909	261504	352	78	0.78	99	0.53706	99	0.5245	99	0.53144	97	0.5069	95	0.50252	99	0.52156
cd00174	744.598	384957	517	51	1.08	54	0.58422	54	0.58084	56	0.59555	55	0.58641	52	0.58614	57	0.58689
cd00178	203.808	10598	52	172	1.09	161	0.79791	162	0.76841	158	0.76777	160	0.77457	163	0.7812	160	0.76585
cd00179	283.1	19817	70	152	1.24	256	0.76358	246	0.75433	251	0.77477	229	0.73821	258	0.78991	246	0.72044
cd00181	510.295	31128	61	128	0.73	506	0.74849	507	0.72994	493	0.71982	507	0.71041	498	0.72566	493	0.75773
cd00185	635.912	72494	114	85	0.91	105	0.58185	84	0.59558	88	0.57523	92	0.5765	95	0.57021	84	0.57539
cd00186	848.635	53464	63	417	1.07	534	0.77554	525	0.77057	519	0.77481	521	0.77311	520	0.77224	522	0.77316
cd00187	982.224	56969	58	444	1.47	424	0.82262	471	0.74102	434	0.82019	431	0.87406	458	0.84534	461	0.86144
cd00188	635.282	388157	611	83	0.57	122	0.55936	108	0.58593	120	0.5525	114	0.56442	123	0.57449	127	0.5514
cd00190	374.011	66574	178	232	1.07	215	0.80178	216	0.82157	217	0.81425	215	0.80773	218	0.80773	214	0.80968
cd00191	1411.33	121374	86	66	1.15	74	0.19873	67	0.25465	72	0.24846	73	0.21672	125	0.19768	72	0.20741
cd00195	314.408	22323	71	141	1.16	147	0.81013	144	0.79405	146	0.7908	146	0.77248	145	0.78006	147	0.8
cd00196	408.288	256405	628	69	0.48	73	0.50751	69	0.45609	75	0.51956	73	0.50278	73	0.51281	74	0.52334
cd00198	854.849	141905	166	161	0.54	169	0.41732	136	0.41366	137	0.4046	168	0.42965	157	0.42895	167	0.41172
cd00200	633.549	57653	91	289	0.87	291	0.40725	294	0.40831	253	0.24838	293	0.39905	292	0.41331	293	0.40811
cd00201	740.133	99918	135	31	1.29	29	0.42268	32	0.44904	32	0.4623	34	0.44998	34	0.44911	34	0.45085
cd00204	977.633	335328	343	126	0.69	173	0.0685	186	0.08604	179	0.07459	169	0.06575	136	0.05303	159	0.06442
cd00205	1495.4	154026	103	177	0.77	227	0.27361	186	0.17981	208	0.26862	202	0.26065	106	0.07966	202	0.26385
cd00207	342.393	67109	196	84	0.89	72	0.66628	69	0.65343	69	0.6516	72	0.66991	70	0.65606	69	0.65069
cd00209	206.648	26451	128	157	1.18	154	0.86108	152	0.86785	154	0.8579	155	0.85437	154	0.86333	155	0.85848
cd00211	377.491	41524	110	136	0.89	138	0.83894	137	0.82979	138	0.83654	139	0.83525	137	0.83755	138	0.83527
cd00212	513.056	45662	89	78	1.22	300	0.16719	310	0.0005	314	0.03832	313	0.09735	306	0.20383	323	0.00074
cd00213	264.23	35671	135	88	1.37	88	0.89622	92	0.93252	88	0.8946	91	0.91998	88	0.91193	88	0.89855
cd00222	1695.94	206905	122	92	1.09	564	0.11402	477	0.09719	435	0.1086	420	0.10921	463	0.1032	484	0.1017
cd00229	442.266	83146	188	188	0.45	161	0.43249	157	0.43734	164	0.42938	160	0.4441	165	0.44293	162	0.43736
cd00241	614.019	63858	104	159	0.42	100	0.14765	150	0.18419	73	0.1271	113	0.16734	81	0.12155	96	0.14605
cd00253	1173.42	89180	76	185	0.8	524	0.50901	466	0.52772	482	0.49011	479	0.4963	466	0.50829	492	0.50309
cd00267	480.86	89440	186	208	0.74	210	0.52842	204	0.53021	209	0.53151	206	0.53281	199	0.52402	204	0.52304
cd00291	142.021	27410	193	69	0.96	72	0.89128	72	0.88654	70	0.89196	72	0.88688	72	0.8974	73	0.90729
cd00296	414.361	50552	122	219	0.98	222	0.63112	219	0.61886	220	0.62571	223	0.63934	217	0.60874	213	0.62099
cd00298	224.453	257448	1147	85	0.72	91	0.77888	88	0.79776	89	0.77665	91	0.77384	93	0.80385	87	0.80257
cd00299	266.874	36028	135	100	0.52	187	0.55972	188	0.53345	190	0.56792	179	0.56754	190	0.5305	188	0.57421
cd00305	183.809	12499	68	144	1.21	138	0.72015	139	0.71891	137	0.71138	137	0.70543	137	0.70863	136	0.69979
cd00306	686.336	188056	274	233	0.61	251	0.51365	247	0.51592	253	0.51645	233	0.50928	238	0.52024	254	0.52485
cd00316	500.708	77109	154	403	0.86	400	0.68982	404	0.67228	395	0.68399	402	0.68072	401	0.69899	394	0.68134
cd00317	284.859	26207	92	146	1.1	142	0.73029	141	0.70768	134	0.69924	138	0.7251	142	0.72187	140	0.71205
cd00320	118.48	11611	98	93	1.21	91	0.82595	92	0.83177	93	0.82858	90	0.81967	90	0.83696	89	0.81713
cd00321	420.476	44150	105	159	1.19	169	0.82761	168	0.86128	175	0.85116	171	0.85187	155	0.84043	182	0.84593
cd00322	396.184	34468	87	223	0.7	221	0.59083	219	0.58015	212	0.5861	213	0.59115	218	0.5822	218	0.58641
cd00326	363.299	64304	177	227	1.07	212	0.74825	213	0.74176	212	0.75197	215	0.74014	213	0.738	212	0.73585
cd00329	733.902	216501	295	106	0.78	339	0.62476	307	0.43	352	0.4605	387	0.60419	286	0.47627	308	0.68137
cd00336	173.158	23030	133	105	1.12	107	0.93823	108	0.92924	108	0.92553	109	0.93919	108	0.91397	110	0.93067
cd00338	470.167	84630	180	137	0.79	216	0.77918	213	0.78345	213	0.7673	211	0.77321	213	0.76179	214	0.77473
cd00347	430.445	110194	256	217	0.41	289	0.29488	284	0.27958	282	0.30242	288	0.30394	288	0.30192	292	0.28681
cd00349	160.616	22165	138	131	1.32	135	0.90177	139	0.91134	136	0.92954	138	0.92412	138	0.9241	139	0.91103
cd00350	164.315	11995	73	36	1.5	34	0.85328	34	0.82617	34	0.79303	34	0.80518	32	0.77464	35	0.78575
cd00351	338.857	23720	70	219	1.4	192	0.7151	210	0.78275	202	0.76875	212	0.79366	202	0.76225	201	0.74713
cd00352	661.687	422156	638	220	0.78	211	0.68743	218	0.36845	207	0.6541	244	0.67691	223	0.68676	199	0.66469
cd00355	129.557	22543	174	53	1.15	58	0.99527	59	0.99461	57	0.99505	57	0.99505	57	0.99505	57	0.99505
cd00361	382.833	22970	60	221	1.57	234	0.94078	232	0.95547	234	0.9592	236	0.97228	233	0.96007	242	0.96832
cd00367	297.538	35407	119	77	1.1	86	0.94016	83	0.94153	86	0.94018	83	0.94092	86	0.94067	86	0.93705
cd00368	814.607	285927	351	475	0.7	521	0.57939	530	0.58255	528	0.57584	526	0.58146	528	0.58452	534	0.57815
cd00371	656.217	69559	106	63	1.05	68	0.49484	72	0.55227	77	0.57576	70	0.50412	72	0.52492	72	0.55364
cd00374	263.247	25535	97	195	0.96	167	0.60488	170	0.62467	166	0.61487	168	0.61941	173	0.64616	174	0.62478
cd00379	213.415	47805	224	155	0.82	157	0.70531	145	0.69625	159	0.73551	158	0.72362	160	0.73827	160	0.73687
cd00382	254.311	41707	164	159	1	162	0.72892	175	0.7459	171	0.74049	173	0.75969	173	0.75121	177	0.74883
cd00383	241.794	126700	524	94	1.01	220	0.90549	218	0.90555	216	0.90909	216	0.89732	217	0.89998	219	0.91034
cd00384	330.014	24421	74	314	1.75	318	0.97229	319	0.97132	320	0.97196	318	0.97146	318	0.96965	318	0.97138
cd00385	417.966	135839	325	243	0.56	229	0.47298	219	0.3874	262	0.31952	244	0.46717	243	0.46698	248	0.49256
cd00386	273.382	46475	170	186	0.98	190	0.79035	188	0.79055	184	0.77341	189	0.7953	182	0.79225	185	0.79755
cd00387	156.744	20220	129	125	1.15	122	0.82637	122	0.83232	123	0.82398	122	0.82607	122	0.83264	122	0.8273
cd00392	173.677	23099	133	114	1.3	113	0.79408	110	0.77064	118	0.86917	108	0.75488	120	0.86195	115	0.79017
cd00397	343.663	56017	163	166	0.63	199	0.56543	213	0.57909	199	0.57157	177	0.57446	205	0.5744	220	0.56622
cd00400	564.212	63756	113	385	0.84	400	0.78067	398	0.78427	396	0.77456	411	0.79066	396	0.78605	394	0.77697
cd00403	286.624	61051	213	206	0.93	199	0.74133	202	0.79062	202	0.76778	202	0.72882	201	0.76044	202	0.79077
cd00412	223.374	20327	91	155	1.42	159	0.92232	159	0.90937	159	0.89873	160	0.92379	157	0.93646	160	0.9439
cd00413	379.477	32635	86	212	0.8	194	0.59994	185	0.58791	183	0.58342	182	0.57073	183	0.57555	189	0.57685
cd00421	270.374	39745	147	152	1.01	158	0.73118	162	0.71091	160	0.72618	157	0.73421	160	0.71331	160	0.72878
cd00427	81.9655	14262	174	57	1.07	63	0.96376	61	0.9693	62	0.96508	62	0.9693	62	0.96536	62	0.96822
cd00431	213.873	43630	204	162	0.81	151	0.76951	155	0.8029	153	0.78977	156	0.80888	149	0.78117	153	0.8087
cd00432	180.706	24576	136	103	1.06	111	0.76609	108	0.77373	114	0.80662	114	0.79726	104	0.76702	116	0.77995
cd00433	504.699	98921	196	469	1.05	449	0.78452	435	0.78235	438	0.78428	433	0.77612	432	0.77366	433	0.77362
cd00446	205.358	31009	151	136	1.13	176	0.91486	175	0.93393	158	0.9245	174	0.92602	175	0.92577	156	0.94125
cd00448	202.237	172508	853	107	0.88	120	0.76333	121	0.77098	123	0.76641	118	0.75554	124	0.76292	121	0.75623
cd00449	319.979	30398	95	255	0.98	265	0.75945	267	0.76823	265	0.77015	261	0.78748	261	0.77368	270	0.74018
cd00462	198.169	30518	154	171	1.25	184	0.90366	184	0.90537	184	0.90644	183	0.90505	182	0.88718	184	0.90735
cd00466	149.411	13447	90	140	1.59	141	0.98158	140	0.97723	140	0.97668	141	0.9848	141	0.97937	143	0.98217
cd00472	130.014	9491	73	54	1.66	59	0.97207	60	0.96725	61	0.97061	60	0.96887	62	0.97269	62	0.96965
cd00473	118.686	60767	512	91	1.04	95	0.9641	95	0.96634	95	0.96712	95	0.96795	95	0.96331	95	0.96807
cd00475	261.873	175717	671	219	1.34	225	0.95031	225	0.94826	225	0.94794	227	0.95429	226	0.94643	225	0.95073
cd00483	236.346	24580	104	128	1.31	155	0.9393	156	0.9391	156	0.93812	155	0.93935	155	0.93973	155	0.94401
cd00487	184.603	28798	156	140	1.24	149	0.89426	157	0.89377	153	0.90103	157	0.88955	157	0.89782	149	0.90457
cd00488	114.327	12919	113	76	1.31	92	0.95066	92	0.96689	92	0.96735	92	0.95192	90	0.96622	92	0.96735
cd00495	200.636	89885	448	90	1.03	182	0.92181	188	0.92408	181	0.90672	184	0.90634	186	0.90911	180	0.91755
cd00501	217.316	12387	57	195	1.21	191	0.69948	191	0.69308	191	0.69348	188	0.70262	191	0.70286	191	0.70788
cd00504	1048.9	76570	73	156	1.34	177	0.81022	198	0.80576	191	0.77817	175	0.76787	194	0.81221	172	0.78304
cd00513	140.161	7849	56	107	1.59	118	0.95869	116	0.96829	117	0.95395	116	0.97409	118	0.95394	119	0.96126
cd00516	366.989	68260	186	262	0.85	262	0.58126	234	0.58003	253	0.60611	249	0.56828	264	0.61873	248	0.55207
cd00518	173.236	34474	199	140	0.85	142	0.85553	143	0.87421	143	0.87369	143	0.85223	144	0.87148	143	0.85807
cd00525	506.77	101354	200	182	0.72	148	0.29245	171	0.39782	174	0.47323	189	0.43923	151	0.36353	166	0.35815
cd00528	253.074	13666	54	136	1.56	146	0.97341	143	0.95852	150	0.9326	146	0.98007	146	0.97928	143	0.95671
cd00531	228.344	37220	163	127	0.58	118	0.46739	116	0.4965	121	0.43288	115	0.37833	114	0.48557	119	0.4745
cd00537	380.684	30074	79	274	1.04	253	0.73731	260	0.73946	258	0.74642	260	0.74518	254	0.73455	258	0.74612
cd00538	667.534	38717	58	127	0.7	132	0.47044	110	0.48228	100	0.47635	90	0.42942	111	0.49213	117	0.48059
cd00551	710.299	139929	197	363	0.56	340	0.40024	318	0.40876	345	0.39556	333	0.39842	342	0.3884	307	0.37231
cd00552	165.594	23680	143	91	1.05	99	0.93023	100	0.93276	99	0.92831	99	0.93595	99	0.92788	99	0.93385
cd00554	231.426	26614	115	153	1.44	157	0.97146	157	0.97083	157	0.97081	157	0.97029	157	0.97042	157	0.97229
cd00562	230.58	25825	112	102	0.85	106	0.85541	103	0.85331	106	0.83994	107	0.84009	107	0.84181	100	0.84875
cd00567	449.371	31456	70	370	0.87	372	0.72268	372	0.7167	372	0.71577	368	0.71212	370	0.71445	368	0.71413
cd00568	574.053	76349	133	168	0.88	496	0.72385	485	0.74159	502	0.7292	506	0.73917	496	0.73327	488	0.73945
cd00569	192.107	48411	252	42	1.16	177	0.98389	177	0.97178	177	0.9871	177	0.98493	174	0.98599	151	0.98472
cd00577	281.911	22271	79	249	0.89	246	0.77022	244	0.75977	246	0.76454	247	0.77556	244	0.76378	247	0.77487
cd00580	124.491	6598	53	113	1.17	112	0.90845	112	0.90156	113	0.89476	113	0.91947	113	0.90887	113	0.91821
cd00588	408.17	21633	53	135	0.87	133	0.74457	140	0.71181	132	0.7344	129	0.69443	131	0.71161	130	0.70171
cd00590	475.367	223898	471	72	0.72	86	0.40438	85	0.40755	86	0.40542	86	0.41279	83	0.4208	85	0.39861
cd00591	100.263	5715	57	85	1.19	90	0.9693	89	0.97008	89	0.97008	89	0.97008	89	0.97008	89	0.97008
cd00593	644.52	127615	198	133	0.94	185	0.55949	184	0.55653	183	0.564	199	0.57639	197	0.56467	197	0.56528
cd00594	540.86	69771	129	270	0.82	263	0.71011	265	0.72199	256	0.69375	262	0.70516	264	0.70984	265	0.71654
cd00598	543.621	31530	58	325	0.75	234	0.47841	245	0.4714	235	0.48676	244	0.48089	242	0.46798	246	0.45291
cd00618	209.216	21340	102	81	0.96	76	0.5407	68	0.4873	84	0.5019	80	0.52562	82	0.54256	68	0.53169
cd00633	140.945	7752	55	67	1.04	65	0.88814	65	0.87317	65	0.87452	66	0.88857	66	0.87553	65	0.88272
cd00636	332.198	122249	368	148	0.5	235	0.49113	229	0.37209	231	0.41003	230	0.47475	234	0.55491	231	0.52089
cd00640	398.342	127071	319	289	0.81	295	0.78071	296	0.76458	296	0.77894	292	0.75714	296	0.73675	298	0.76806
cd00641	345.518	38007	110	193	1.42	191	0.86367	191	0.86919	190	0.87132	191	0.89037	192	0.8825	193	0.88496
cd00651	281.3	19691	70	121	0.75	96	0.20156	111	0.213	108	0.21094	85	0.19121	98	0.18902	76	0.16278
cd00652	237.587	14968	63	173	1.57	177	0.95963	178	0.96327	179	0.96163	178	0.95817	178	0.9581	177	0.96012
cd00653	1227.25	138679	113	1088	1.09	877	0.64969	888	0.65538	883	0.65008	875	0.65266	889	0.63836	877	0.6465
cd00657	219.88	29244	133	126	0.63	129	0.76432	130	0.79266	133	0.76418	133	0.77238	131	0.77123	131	0.76085
cd00677	475.056	84085	177	46	1.07	54	0.30768	32	0.18368	64	0.58484	74	0.35993	68	0.41153	63	0.42334
cd00688	1001.95	268522	268	302	0.66	212	0.1477	168	0.13201	183	0.23154	228	0.19265	227	0.18115	236	0.17057
cd00719	270.317	16219	60	69	0.79	34	0.42603	59	0.42329	48	0.42807	45	0.39527	46	0.41521	62	0.52293
cd00741	479.497	82953	173	152	0.67	161	0.384	167	0.42487	154	0.39127	161	0.36641	178	0.42235	177	0.40446
cd00756	172.124	24958	145	124	1.2	130	0.93168	131	0.93889	132	0.93832	133	0.92943	134	0.93661	131	0.94025
cd00761	394.431	114385	290	190	0.51	188	0.46454	199	0.47074	187	0.47692	185	0.46558	188	0.47713	186	0.47196
cd00838	352.44	52866	150	199	0.44	140	0.38009	138	0.38538	141	0.38837	143	0.3883	134	0.38169	139	0.38913
cd00882	344.293	51644	150	160	0.66	150	0.5959	154	0.55355	153	0.61913	151	0.60381	146	0.57978	163	0.58343
cd00945	266.271	31420	118	200	0.89	198	0.59248	201	0.62549	196	0.65112	205	0.62707	201	0.64118	200	0.63159
cd00985	215.425	38992	181	178	0.88	159	0.60484	164	0.59201	159	0.64218	168	0.68547	160	0.51468	166	0.66391
cd00995	555.994	197378	355	464	0.72	493	0.73897	493	0.73915	493	0.73506	487	0.73742	488	0.73727	487	0.74253
cd01037	262.6	26260	100	78	0.62	84	0.34073	70	0.29944	52	0.24558	100	0.35001	97	0.28502	96	0.29549
cd01066	379.495	39088	103	208	0.7	234	0.58883	229	0.60204	242	0.59952	248	0.59846	257	0.59887	241	0.60089
cd01081	323.983	18791	58	283	0.79	250	0.53964	255	0.51174	252	0.53769	255	0.53783	249	0.50911	245	0.51745
cd01291	483.551	47388	98	326	0.56	196	0.25017	196	0.24978	229	0.25435	205	0.24126	200	0.24115	210	0.2517
cd01292	485.902	24781	51	276	0.59	75	0.09694	63	0.08127	42	0.0838	58	0.08654	77	0.08021	47	0.06711
cd01335	366.897	21280	58	204	0.51	176	0.32126	46	0.09662	24	0.08172	84	0.16701	87	0.17967	116	0.24188
cd01342	655.564	607708	927	83	0.62	307	0.54184	334	0.56171	338	0.55235	312	0.55029	304	0.54898	301	0.5467
cd01391	479.295	61829	129	279	0.5	265	0.53601	258	0.55349	244	0.49024	244	0.5006	242	0.47548	261	0.50696
cd01392	339.942	459602	1352	52	1.12	316	0.84012	320	0.83901	315	0.83714	316	0.83768	317	0.83815	318	0.8371
cd01425	266.953	45649	171	211	1.2	184	0.85861	186	0.86518	177	0.86959	183	0.87114	184	0.86427	181	0.86995
cd01427	260.443	91676	352	201	0.54	144	0.54119	146	0.55059	144	0.52526	146	0.54894	144	0.54286	141	0.56101
cd01433	170.468	26593	156	112	1.16	130	0.78717	129	0.81466	132	0.81085	130	0.78991	132	0.81848	128	0.7735
cd01514	718.906	259525	361	79	1.04	456	0.94805	448	0.95443	457	0.96133	460	0.95132	459	0.94987	452	0.95863
cd01594	492.191	203275	413	321	0.73	299	0.3668	329	0.42892	325	0.38211	365	0.49979	368	0.46052	325	0.44495
cd01610	317.869	199304	627	120	0.6	142	0.71973	149	0.73412	158	0.73995	149	0.72019	143	0.7345	153	0.73049
cd01614	92.7286	6491	70	83	1.23	81	0.89741	81	0.90441	82	0.89274	81	0.9213	81	0.91901	83	0.89347
cd01635	430.234	40442	94	313	0.47	267	0.30908	294	0.31289	288	0.32412	251	0.29039	268	0.30813	283	0.30855
cd01901	347.753	231951	667	163	0.63	176	0.44623	170	0.42673	155	0.39307	179	0.44227	162	0.43334	136	0.38849
cd01983	353.452	333305	943	174	0.47	186	0.35644	193	0.38705	192	0.37614	185	0.4173	186	0.37284	140	0.39074
cd02062	253.324	18746	74	158	0.86	156	0.76182	156	0.75252	155	0.75801	157	0.73808	155	0.75361	153	0.74344
cd02065	534.04	66755	125	125	0.83	120	0.43623	112	0.39673	118	0.46181	109	0.42184	126	0.45184	126	0.47019
cd02116	462.894	752665	1626	60	0.54	74	0.46882	76	0.47057	70	0.46673	83	0.47269	75	0.47976	64	0.46701
cd02153	554.82	89326	161	98	1.12	102	0.80473	99	0.88869	101	0.89101	103	0.86967	103	0.80459	102	0.8489
cd02205	340.76	147549	433	113	0.6	117	0.53933	113	0.53596	116	0.54842	116	0.53186	117	0.54657	116	0.5387
cd02257	902.932	279006	309	321	0.7	290	0.55842	284	0.55733	289	0.55846	295	0.56771	290	0.56568	281	0.55444
cd02325	528.98	159752	302	60	0.84	73	0.71959	75	0.72108	67	0.74064	61	0.72907	72	0.7416	66	0.73802
cd02407	156.456	8918	57	115	1.42	114	0.90862	116	0.94978	114	0.90767	116	0.94098	114	0.91125	115	0.94699
cd02409	284.825	76333	268	67	0.69	106	0.40507	132	0.43183	111	0.43044	125	0.40785	119	0.43279	111	0.37453
cd02439	364.342	58659	161	315	1.1	300	0.67275	280	0.68335	297	0.7121	277	0.62762	283	0.66028	297	0.69399
cd02440	370.214	38132	103	142	0.51	106	0.5457	108	0.53027	105	0.51181	100	0.47839	110	0.57158	108	0.54988
cd02696	383.424	200531	523	174	1	175	0.85862	177	0.86631	176	0.86781	175	0.85884	176	0.86237	176	0.86927
cd02775	828.659	323177	390	101	0.74	577	0.72287	585	0.72943	575	0.72469	574	0.71401	587	0.73118	582	0.73132
cd02883	207.35	41470	200	123	0.64	115	0.5592	111	0.58578	111	0.57815	110	0.58362	115	0.59699	106	0.59807
cd03127	257.283	29073	113	90	0.83	201	0.70242	201	0.75251	193	0.73398	194	0.72324	191	0.74657	202	0.71229
cd03128	377.622	652909	1729	92	0.49	148	0.57191	146	0.54975	150	0.5538	145	0.57331	147	0.57908	144	0.55866
cd03174	483.123	475393	984	265	0.93	257	0.77381	260	0.81916	258	0.78489	258	0.74007	261	0.84571	262	0.82582
cd03333	650.946	217416	334	251	0.95	458	0.68212	462	0.74739	461	0.75574	457	0.71825	461	0.73529	474	0.74323
cd03440	261.528	482780	1846	100	0.45	103	0.59306	108	0.57824	105	0.58449	106	0.60779	102	0.59281	108	0.58742
cd03467	273.353	41823	153	98	0.78	94	0.60205	95	0.58599	96	0.59759	97	0.58438	95	0.60468	95	0.60424
cd03493	154.792	50617	327	98	0.55	107	0.65888	104	0.67541	105	0.65153	103	0.66416	108	0.69816	104	0.69452
cd03587	388.083	60541	156	41	1.23	118	0.87352	64	0.92682	74	0.90313	50	0.90253	55	0.89117	126	0.89382
cd04100	562.567	118139	210	87	1.04	401	0.83821	407	0.8628	408	0.85709	407	0.86631	405	0.82683	403	0.8393
cd04301	220.602	209351	949	65	0.62	131	0.80246	133	0.79839	133	0.77291	133	0.79714	104	0.77425	130	0.7972
cd04332	307.653	152288	495	136	0.75	147	0.78617	150	0.79949	147	0.83492	143	0.77969	151	0.79541	152	0.79153
cd04369	911.724	254371	279	99	0.8	118	0.52165	115	0.54135	129	0.54245	112	0.53615	113	0.5339	114	0.52652
cd04371	820.57	158370	193	81	0.83	165	0.56307	102	0.55998	130	0.57179	134	0.55826	126	0.56844	122	0.55307
cd04508	1203.99	420192	349	48	1	90	0.33383	75	0.33653	84	0.34346	75	0.34108	76	0.33211	107	0.33114
cd04519	1143.03	86870	76	257	0.66	287	0.46032	281	0.45815	269	0.46022	285	0.44406	284	0.45738
cd05188	389.805	77961	200	275	0.75	302	0.68675	301	0.67998	296	0.67764	300	0.67903	300	0.6797	301	0.66682
cd05466	299.712	105199	351	197	0.69	288	0.87343	289	0.86574	291	0.87903	289	0.86903	291	0.87684	287	0.86812
cd05709	368.014	152358	414	202	0.76	156	0.66436	156	0.70028	158	0.64079	156	0.68327	158	0.65676	158	0.66874
cd05819	688.013	110082	160	271	0.84	260	0.44549	260	0.43543	258	0.44613	219	0.27675	250	0.4377	257	0.43647
cd05992	547.312	84286	154	81	0.79	90	0.69966	79	0.71962	88	0.70084	76	0.68257	88	0.71114	77	0.6828
cd06071	2133.4	149338	70	277	1.37	332	0.76133	275	0.73076	355	0.75678	335	0.75136	329	0.74653	307	0.72484
cd06093	587.464	121605	207	106	0.71	115	0.70657	125	0.68868	118	0.69895	111	0.71319	115	0.70755	109	0.71929
cd06157	339.772	19367	57	166	0.8	201	0.77562	200	0.76699	203	0.75437	209	0.73306	207	0.75819	199	0.7599
cd06167	322.265	86367	268	151	0.57	149	0.58382	147	0.59362	129	0.55433	137	0.59443	136	0.59905	128	0.5473
cd06171	256.712	18740	73	55	1.03	153	0.98746	136	0.97916	151	0.98482	156	0.97082	138	0.98746	138	0.96893
cd06174	474.433	209225	441	390	0.4	384	0.63087	377	0.62838	374	0.64084	376	0.62911	373	0.62347	376	0.61819
cd06222	484.917	40733	84	121	0.87	126	0.68566	133	0.68277	129	0.69121	132	0.67027	130	0.68958	127	0.66936
cd06223	268.35	292502	1090	130	0.54	130	0.6998	127	0.63743	127	0.65609	121	0.66877	132	0.67084	133	0.67605
cd06224	1098.91	98902	90	122	0.75	361	0.4602	358	0.51456	356	0.47925	360	0.4823	355	0.4908	341	0.478
cd06225	597.078	122401	205	48	0.76	215	0.80561	215	0.81421	235	0.81459	206	0.80708	199	0.79767	242	0.82356
cd06257	407.604	62771	154	55	1.24	69	0.91385	67	0.94389	70	0.91037	69	0.90364	71	0.91197	71	0.91215
cd06259	249.102	111847	449	151	0.75	146	0.73785	149	0.72555	145	0.72812	146	0.70002	146	0.71226	146	0.70993
cd06260	206.097	76256	370	155	0.67	172	0.69325	172	0.65597	171	0.70979	174	0.70815	168	0.67459	173	0.68533
cd06261	317.798	80403	253	191	0.51	217	0.60351	216	0.60162	212	0.59379	218	0.60265	207	0.60262	205	0.58688
cd06445	172.34	65317	379	79	1.2	81	0.88742	82	0.89598	78	0.87946	81	0.89611	81	0.88797	81	0.89929
cd06462	223.036	177537	796	85	0.77	101	0.71198	100	0.72674	97	0.68874	108	0.72119	103	0.67792	106	0.71978
cd06534	513.397	34911	68	427	1.02	428	0.80105	440	0.80432	444	0.80616	440	0.79585	442	0.79533	442	0.80724
cd06550	331.241	26168	79	261	0.8	250	0.67447	253	0.71858	254	0.71985	261	0.70405	255	0.67419	243	0.6836
cd06558	336.511	234548	697	195	0.78	244	0.85324	237	0.84242	242	0.84197	245	0.83128	242	0.84288	240	0.83941
cd06559	252.377	30790	122	208	1.21	204	0.84917	207	0.86029	203	0.8503	207	0.85847	204	0.85365	206	0.85479
cd06560	357.02	17851	50	166	0.77	278	0.60021	295	0.61077	295	0.59476	281	0.6072	294	0.60887	286	0.59575
cd06561	243.12	42546	175	198	0.76	198	0.66341	200	0.65277	201	0.65315	199	0.64472	199	0.69058	201	0.66493
cd06567	582.608	286643	492	334	0.66	341	0.50628	327	0.51411	333	0.51685	324	0.51629	334	0.52989	330	0.51303
cd06571	398.213	78448	197	90	1.1	102	0.92885	101	0.92503	105	0.92414	100	0.92988	103	0.92826	106	0.92906
cd06572	449.423	87188	194	390	1.35	409	0.92814	409	0.92823	409	0.93013	417	0.93188	402	0.92439	409	0.93033
cd06578	327.454	136221	416	240	0.67	228	0.77698	228	0.76503	228	0.773	229	0.77229	227	0.76902	226	0.76325
cd06583	357.452	103661	290	125	0.87	148	0.783	135	0.75656	137	0.76051	139	0.75686	136	0.79168	137	0.76594
cd06587	170.075	54424	320	113	0.62	113	0.60469	112	0.64153	113	0.64514	112	0.63128	113	0.64549	113	0.65031
cd06660	333.381	383055	1149	286	0.84	254	0.82202	253	0.81454	254	0.80795	254	0.81796	255	0.80952	253	0.82578
cd06661	202.281	45311	224	99	0.76	113	0.71931	102	0.73415	112	0.70353	114	0.72986	100	0.72581	102	0.71086
cd06664	161.903	33514	207	122	1.05	113	0.79759	115	0.80444	115	0.82345	116	0.79818	116	0.80568	116	0.80071
cd06845	231.31	20124	87	144	0.88	141	0.71977	140	0.71125	147	0.72598	150	0.72295	145	0.72018	144	0.71847
cd06911	292.681	40390	138	86	1.03	203	0.84207	205	0.84709	211	0.83451	205	0.84185	203	0.83772	215	0.83957
cd06916	456.136	26912	59	72	1.86	83	0.94928	83	0.94131	81	0.94374	81	0.94494	84	0.93854	84	0.93619
cd06919	126.644	7472	59	111	1.62	116	0.96034	118	0.97436	116	0.96566	116	0.96267	118	0.97847	117	0.96975
cd06920	742.571	77970	105	117	0.8	204	0.17731	188	0.1781	178	0.1678	193	0.174	171	0.18074	201	0.17478
cd06971	173.756	29191	168	143	1.02	142	0.74031	146	0.77628	143	0.77546	144	0.77335	145	0.77616	141	0.7692
cd06974	349.249	61817	177	163	0.9	138	0.43798	151	0.46897	141	0.44919	145	0.45442	142	0.45363	140	0.45545
cd07025	324.564	66211	204	281	0.94	281	0.81857	283	0.81737	282	0.81714	281	0.81321	281	0.81809	278	0.81466
cd07026	125.133	13139	105	106	1.4	111	0.97742	114	0.9794	111	0.97793	110	0.97689	114	0.97806	113	0.97628
cd07040	332.627	141699	426	205	0.6	187	0.57179	169	0.55381	168	0.53315	178	0.57102	175	0.55449	179	0.5685
cd07066	1413.91	189464	134	118	0.94	136	0.3419	126	0.35747	113	0.35937	111	0.33819	127	0.3536	128	0.35056
cd07153	147.014	54395	370	116	0.95	127	0.87609	126	0.87416	126	0.87497	125	0.87426	126	0.87202	127	0.87908
cd07177	251.447	90018	358	104	0.59	127	0.66613	125	0.71116	123	0.67871	118	0.67735	121	0.68503	119	0.70639
cd07185	355.553	372264	1047	106	0.94	136	0.87656	130	0.86237	123	0.86228	125	0.86568	133	0.86576	135	0.86277
cd07304	375.771	54111	144	344	1.39	340	0.92572	343	0.92123	348	0.93399	340	0.91851	345	0.92142	342	0.92883
cd07307	603.79	37435	62	194	0.6	193	0.4824	197	0.48412	158	0.47167	201	0.48894	172	0.44814	206	0.54038
cd07323	507.581	31470	62	75	1.28	85	0.89113	89	0.89783	88	0.89131	88	0.88047	89	0.89269	89	0.8908
cd07377	284.978	118551	416	66	1.03	202	0.97402	186	0.97268	79	0.97635	212	0.97017	79	0.97776	79	0.97709
cd07440	488.931	28358	58	113	0.89	120	0.49077	128	0.58237	122	0.56339	123	0.6191	123	0.5836	124	0.57421
cd07557	197.642	57909	293	91	1.01	116	0.89114	120	0.89	124	0.88082	122	0.88717	121	0.87423	129	0.89547
cd07765	548.298	62506	114	40	1.27	79	0.72027	85	0.71883	76	0.71186	84	0.71537	79	0.71824	68	0.71239
cd07812	184.684	36198	196	141	0.47	136	0.48152	139	0.47893	133	0.47287	139	0.48308	140	0.47646	135	0.48348
cd07828	220.042	15623	71	148	1.12	154	0.81671	154	0.83477	151	0.8252	153	0.8324	154	0.81847	151	0.82864
cd07914	218.606	31042	142	191	1.56	192	0.97547	192	0.97827	192	0.97467	192	0.97812	192	0.97568	192	0.97916
cd07976	334.235	28410	85	316	0.75	158	0.41011	138	0.40981	130	0.38677	176	0.40658	138	0.39578	154	0.41229
cd07980	321.15	25692	80	123	0.98	237	0.69974	230	0.70414	232	0.698	225	0.68448	229	0.70758	234	0.69739
cd07995	241.026	64113	266	208	0.88	205	0.78459	204	0.77957	204	0.77684	206	0.78815	204	0.78597	205	0.78813
cd08010	359.597	24093	67	246	1.21	312	0.87056	294	0.86402	321	0.85936	306	0.86773	292	0.86017	318	0.86051
cd08026	122.163	11972	98	102	1.1	106	0.94631	105	0.94538	106	0.94234	106	0.94058	106	0.94412	106	0.94488
cd08044	713.5	48518	68	133	1.05	487	0.86696	466	0.87272	452	0.87565	463	0.85887	485	0.8573	478	0.88065
cd08048	234.1	11705	50	84	1.52	90	0.8903	97	0.89092	101	0.89814	100	0.89581	97	0.90199	98	0.89477
cd08168	276.728	28503	103	87	0.97	73	0.44668	78	0.44809	79	0.3918	83	0.43799	72	0.45291	73	0.44922
cd08368	495.588	197244	398	53	1.08	115	0.33222	116	0.32849	117	0.32772	113	0.33101	118	0.32685	114	0.3329
cd08768	472.77	28839	61	87	0.98	360	0.87148	357	0.86885	366	0.87831	363	0.85607	356	0.85452	362	0.84326
cd08774	314.32	31432	100	225	1.29	228	0.89082	227	0.87505	228	0.88202	229	0.88646	228	0.88117	228	0.88228
cd09030	130.822	9550	73	102	0.93	118	0.75876	122	0.76495	121	0.79768	121	0.75732	123	0.74859	118	0.74703
cd09212	648.326	89469	138	96	0.71	73	0.57065	68	0.56072	73	0.56983	82	0.56954	80	0.56077	75	0.56911
cd09233	1730.88	96929	56	356	1.04	722	0.72264	700	0.70926	695	0.66852	713	0.72454	748	0.71451	755	0.7161
cd09281	196.399	37905	193	123	1.21	125	0.84801	120	0.82051	119	0.81599	119	0.81152	120	0.81469	126	0.84006
cd09294	155.133	30251	195	116	1.53	146	0.97497	146	0.97916	147	0.97549	146	0.97482	146	0.98024	146	0.97638
cd09487	489.194	50387	103	56	0.88	57	0.71398	57	0.72651	58	0.73507	60	0.71764	61	0.74638	58	0.73932
cd09634	356.183	50578	142	318	0.94	291	0.79931	293	0.80266	291	0.80621	299	0.81064	293	0.7989	297	0.79684
cd09652	257.393	15701	61	189	0.72	205	0.51899	209	0.52825	208	0.51911	212	0.52576	218	0.53781	211	0.51165
cd09693	238.976	30111	126	204	0.68	133	0.41087	142	0.42812	139	0.4137	140	0.4086	136	0.4625	146	0.39968
cd09725	93.3471	11295	121	79	1.19	85	0.89757	87	0.89545	85	0.89603	87	0.89225	86	0.90053	87	0.89856
cd09727	221.667	11305	51	210	1.06	190	0.73613	192	0.74317	190	0.75131	192	0.72643	190	0.74026	187	0.73358
cd09731	187.983	11091	59	141	0.88	145	0.6591	144	0.65625	145	0.656	144	0.64686	145	0.66034	143	0.60135
cd09804	365.073	20079	55	121	1.35	122	0.9449	131	0.93738	129	0.93643	130	0.94382	123	0.93861	128	0.94048
cd09916	164.932	12040	73	96	0.91	141	0.90932	111	0.91378	139	0.93923	114	0.92288	117	0.91087	127	0.92365
cd10146	290.326	65033	224	69	0.98	234	0.70813	227	0.72252	224	0.73911	230	0.73097	227	0.74219	233	0.73623
cd10147	431.874	140791	326	145	0.63	382	0.76113	387	0.75034	247	1e-05	383	0.75429	371	0.70683	384	0.77137
cd10148	99.0672	13275	134	80	1.16	85	0.91195	83	0.90105	83	0.88099	84	0.90718	86	0.9201	85	0.90878
cd10315	1286.16	138905	108	100	0.96	621	0.00132	707	0.30483	679	0.27482	676	0.28442	694	0.26913	679	0.27778
cd10316	632.903	39240	62	92	1.18	446	0.70879	465	0.71091	455	0.68482	464	0.66353	425	0.65948	480	0.74119
cd10719	394.607	147583	374	65	1.25	332	0.91304	333	0.90087	337	0.86228	329	0.8768	333	0.90833	331	0.87805
cd10747	395.8	172569	436	222	1.08	342	0.86533	344	0.86201	332	0.86687	332	0.8658	334	0.86408	332	0.86644
cd11296	631.21	63121	100	338	0.53	230	0.43492	236	0.44605	227	0.43137	235	0.43488	241	0.45302	227	0.43856
cd11308	822.733	61705	75	76	1.38	372	0.59373	371	0.58955	372	0.58888	377	0.59213	376	0.5941	375	0.58984
cd11375	274.699	28294	103	173	1	170	0.70174	168	0.70439	171	0.70707	168	0.72117	167	0.7085	170	0.6963
cd11377	748.2	52374	70	138	0.91	471	0.80685	472	0.78139	474	0.79234	467	0.78887	466	0.80235	476	0.80761
cd11378	215.408	16371	76	113	0.99	125	0.82722	124	0.80381	125	0.82088	125	0.81948	126	0.81552	126	0.81246
cd11380	210.309	28602	136	138	1.48	119	0.73752	118	0.6728	110	0.66202	119	0.73175	120	0.74289	120	0.74538
cd11572	396.008	94250	238	99	1.09	383	0.87335	383	0.87276	389	0.89328	388	0.90133	389	0.89078	388	0.90128
cd11586	77.35	4641	60	54	0.87	59	0.91774	59	0.91637	58	0.90418	59	0.9004	59	0.90557	58	0.90205
cd11655	696.786	48775	70	57	1.16	139	0.21359	157	0.56748	118	0.38763	136	0.21777	132	0.20554	136	0.21158
cd11660	419.916	39892	95	50	1.41	52	0.87194	51	0.84979	55	0.88104	52	0.8564	52	0.87642	52	0.88305
cd11691	266.836	16277	61	107	0.84	199	0.32978	201	0.33316	198	0.32705	204	0.34697	204	0.34956	200	0.34167
cd11709	1688.43	168843	100	117	0.85	122	0.53973	114	0.5163	118	0.53224	121	0.54337	125	0.54372	119	0.48982
cd11740	163.108	82696	507	159	1.47	159	0.96595	159	0.96587	159	0.96604	159	0.96667	160	0.97012	159	0.96665
cd12082	478.623	25367	53	422	0.68	417	0.65742	415	0.65427	412	0.63986	419	0.65601	419	0.66947	402	0.62921
cd12144	552.69	32056	58	114	1.32	83	0.65026	354	0.79813	347	0.82947	256	0.67799	161	0.69742	323	0.71842
cd12148	768.811	1667552	2169	409	0.38	461	0.54375	461	0.53712	459	0.55685	453	0.54208	454	0.54348	449	0.54476
cd12151	297.966	61679	207	282	0.96	272	0.84278	270	0.8236	270	0.83787	269	0.83868	271	0.85845	271	0.83113
cd12152	146.54	48065	328	123	0.84	123	0.82672	124	0.82246	129	0.8492	128	0.8493	123	0.83788	122	0.82476
cd12208	155.775	12462	80	150	1.25	150	0.97056	149	0.96348	150	0.96121	150	0.96497	150	0.97062	150	0.96939
cd12212	153.875	8617	56	115	1.32	136	0.9162	141	0.91676	141	0.9097	139	0.91426	143	0.91986	139	0.92019
cd12843	240.517	13950	58	106	1.08	229	0.81626	231	0.8199	229	0.81116	229	0.82295	226	0.81407	228	0.80926
cd12870	94.8889	6832	72	66	1.02	73	0.76658	74	0.81522	73	0.79035	74	0.79025	72	0.76081	73	0.80717
cd12927	150.827	23529	156	103	0.89	109	0.75953	101	0.73376	102	0.73355	106	0.79119	104	0.76149	102	0.73261
cd12934	581.014	40671	70	37	1.31	75	0.92679	104	0.91967	88	0.95027	52	0.94516	88	0.94044	88	0.93658
cd12935	645.586	45191	70	36	1.34	163	0.96821	137	0.9203	179	0.97439	174	0.93444	181	0.94205	151	0.96169
cd12962	1525.84	105283	69	95	1.37	547	0.21139	515	0.20611	495	0.2097	554	0.20326	490	0.20539	494	0.20071
cd13394	660.37	35660	54	618	0.94	536	0.63001	542	0.64218	529	0.61836	549	0.62545	552	0.64108	543	0.63312
cd13433	1560.33	113904	73	54	1.52	856	0.88832	850	0.90049	606	0.88752	838	0.90061	849	0.89788	850	0.90692
cd13777	431.09	52593	122	128	0.98	295	0.72866	288	0.72402	296	0.73406	298	0.72502	289	0.7153	306	0.72209
cd13778	455.21	56446	124	155	0.84	313	0.65891	309	0.64082	310	0.63756	319	0.64725	316	0.65032	314	0.64124
cd13944	405.431	131765	325	275	1.2	277	0.94119	278	0.94364	278	0.94064	277	0.9437	277	0.9459	276	0.94017
cd14251	654.87	45186	69	370	1.21	384	0.78091	380	0.74581	377	0.75629	373	0.77468	375	0.77567	382	0.77635
cd14262	237.495	23512	99	173	0.77	200	0.62748	209	0.65195	207	0.61546	199	0.62978	209	0.6299	208	0.6305
cd14263	135.455	13681	101	106	1.12	117	0.97865	116	0.9756	116	0.96635	115	0.9701	116	0.9689	116	0.96745
cd14438	356.654	18546	52	41	1.47	213	0.94478	214	0.9453	207	0.94563	206	0.9485	203	0.94053	202	0.94412
cd14458	383.746	24176	63	105	1.25	191	0.8439	183	0.83729	184	0.84755	196	0.86183	188	0.84757	191	0.85598
cd14473	1150.88	356772	310	99	0.8	274	0.674	276	0.67692	274	0.68211	275	0.69287	272	0.67088	274	0.66972
cd14660	369.825	35873	97	105	1.22	185	0.88834	189	0.87735	191	0.87504	185	0.89732	182	0.88736	201	0.88213
cd14745	737.333	37604	51	329	1.31	517	0.82326	510	0.81877	519	0.8225	510	0.83615	511	0.83115	517	0.81985
cd14752	861.653	506652	588	203	0.53	566	0.48676	581	0.53583	577	0.51378	598	0.53368	595	0.53035	546	0.48577
cd14785	391.549	39938	102	371	1.09	360	0.81053	351	0.79695	365	0.8252	361	0.79443	354	0.80873	355	0.81913
cd14798	871.782	88050	101	124	0.92	465	0.6803	471	0.6769	473	0.65838	483	0.69865	493	0.68151	478	0.70608
cd14947	650.338	128767	198	113	1.05	112	0.72782	113	0.74855	114	0.74333	116	0.74484	117	0.72708	117	0.73724
cd14948	650.08	612375	942	83	0.74	185	0.4338	266	0.42394	179	0.41674	254	0.43166	252	0.40133	244	0.42383
cd15457	272.136	213355	784	152	1.09	143	0.83159	141	0.82804	141	0.82054	143	0.81162	140	0.81356	138	0.8232
cd15481	595.855	41114	69	195	0.96	422	0.78748	423	0.76338	431	0.79029	423	0.75975	417	0.76237	428	0.79544
cd15489	1432.48	282199	197	47	0.94	53	0.2505	48	0.23872	50	0.23625	53	0.25717	52	0.23128	52	0.25165
cd15802	1443.49	88053	61	74	1.43	473	0.84079	494	0.82731	486	0.82958	490	0.81825	493	0.80969	487	0.82926
cd15832	299.275	15263	51	279	1.28	285	0.91909	284	0.92455	283	0.91926	284	0.92758	284	0.92175	283	0.92722

## Sheet: SPscores
cdd_id	ave_len	nres	num_sq	cols	RE	GISMO0	GISMO1	GISMO2	GISMO3	GISMO4	GISMO5
cd10315	1286.16	138905	108	100	0.96	0.00132	0.30483	0.27482	0.28442	0.26913	0.27778
cd00088	836.011	73569	88	97	0.8	0.00282	0.00373	0.00308	0.00285	0.00381	0.00242
cd00112	2333.33	1320665	566	35	1.27	0.01145	0.00821	0.00258	0.00686	0.01392	0.00193
cd00055	2223.44	707055	318	50	1.09	0.02772	0.03041	0.0271	0.02632	0.0305	0.02942
cd00063	5295.95	3929593	742	93	0.62	0.04855	0.04351	0.04015	0.04318	0.04686	0.0482
cd00064	1210.89	193742	160	49	0.92	0.05499	0.04844	0.07137	0.04769	0.03965	0.04835
cd00204	977.633	335328	343	126	0.69	0.0685	0.08604	0.07459	0.06575	0.05303	0.06442
cd00146	2157.34	153171	71	81	0.78	0.08287	0.09317	0.08687	0.08437	0.08938	0.09183
cd00033	812.219	233919	288	57	0.85	0.09382	0.08999	0.09541	0.09796	0.0876	0.09229
cd01292	485.902	24781	51	276	0.59	0.09694	0.08127	0.0838	0.08654	0.08021	0.06711
cd00096	1614.13	2960322	1834	72	0.55	0.1106	0.1101	0.10441	0.11359	0.10649	0.10782
cd00222	1695.94	206905	122	92	1.09	0.11402	0.09719	0.1086	0.10921	0.1032	0.1017
cd00041	1773.26	523113	295	112	0.85	0.1157	0.10978	0.114	0.11681	0.11739	0.12511
cd00012	430.08	53760	125	303	0.44	0.1197	0.1708	0.16214	0.15256	0.08415	0.10842
cd00164	735.477	80167	109	65	0.87	0.14141	0.28422	0.15799	0.11775	0.13225	0.25407
cd00241	614.019	63858	104	159	0.42	0.14765	0.18419	0.1271	0.16734	0.12155	0.14605
cd00688	1001.95	268522	268	302	0.66	0.1477	0.13201	0.23154	0.19265	0.18115	0.17057
cd00110	1992.74	227172	114	151	0.75	0.149	0.15091	0.14904	0.15313	0.1524	0.14992
cd00130	771.413	141940	184	103	0.42	0.15022	0.19775	0.1984	0.19209	0.19275	0.17733
cd00212	513.056	45662	89	78	1.22	0.16719	0.0005	0.03832	0.09735	0.20383	0.00074
cd00105	740.726	410362	554	64	0.78	0.17222	0.17863	0.11418	0.1091	0.15293	0.16324
cd06920	742.571	77970	105	117	0.8	0.17731	0.1781	0.1678	0.174	0.18074	0.17478
cd00138	547.923	42738	78	119	0.64	0.18216	0.24758	0.2593	0.26457	0.24831	0.23398
cd00191	1411.33	121374	86	66	1.15	0.19873	0.25465	0.24846	0.21672	0.19768	0.20741
cd00651	281.3	19691	70	121	0.75	0.20156	0.213	0.21094	0.19121	0.18902	0.16278
cd12962	1525.84	105283	69	95	1.37	0.21139	0.20611	0.2097	0.20326	0.20539	0.20071
cd11655	696.786	48775	70	57	1.16	0.21359	0.56748	0.38763	0.21777	0.20554	0.21158
cd00102	1463.68	207842	142	89	0.72	0.2196	0.23184	0.23011	0.2288	0.18153	0.18613
cd01291	483.551	47388	98	326	0.56	0.25017	0.24978	0.25435	0.24126	0.24115	0.2517
cd00015	681.183	40871	60	185	1.07	0.25469	0.25989	0.25436	0.25741	0.25653	0.2553
cd00205	1495.4	154026	103	177	0.77	0.27361	0.17981	0.26862	0.26065	0.07966	0.26385
cd00009	655.694	87863	134	150	0.62	0.28346	0.3609	0.36248	0.33619	0.35659	0.35946
cd00525	506.77	101354	200	182	0.72	0.29245	0.39782	0.47323	0.43923	0.36353	0.35815
cd00347	430.445	110194	256	217	0.41	0.29488	0.27958	0.30242	0.30394	0.30192	0.28681
cd00109	886.489	83330	94	54	1.29	0.30607	0.29383	0.24612	0.30792	0.30034	0.29298
cd00677	475.056	84085	177	46	1.07	0.30768	0.18368	0.58484	0.35993	0.41153	0.42334
cd01635	430.234	40442	94	313	0.47	0.30908	0.31289	0.32412	0.29039	0.30813	0.30855
cd00027	861.048	124852	145	72	0.66	0.31131	0.31745	0.30266	0.3131	0.30929	0.32541
cd00081	898.449	70079	78	311	0.55	0.31782	0.41732	0.4006	0.30703	0.39474	0.40137
cd01335	366.897	21280	58	204	0.51	0.32126	0.09662	0.08172	0.16701	0.17967	0.24188
cd00022	475.892	30933	65	69	1.3	0.32515	0.32458	0.32908	0.33547	0.29642	0.3337
cd11691	266.836	16277	61	107	0.84	0.32978	0.33316	0.32705	0.34697	0.34956	0.34167
cd08368	495.588	197244	398	53	1.08	0.33222	0.32849	0.32772	0.33101	0.32685	0.3329
cd04508	1203.99	420192	349	48	1	0.33383	0.33653	0.34346	0.34108	0.33211	0.33114
cd01037	262.6	26260	100	78	0.62	0.34073	0.29944	0.24558	0.35001	0.28502	0.29549
cd07066	1413.91	189464	134	118	0.94	0.3419	0.35747	0.35937	0.33819	0.3536	0.35056
cd00167	625.602	106978	171	45	0.94	0.34474	0.35436	0.34445	0.33757	0.33037	0.34557
cd01983	353.452	333305	943	174	0.47	0.35644	0.38705	0.37614	0.4173	0.37284	0.39074
cd00051	282.8	29694	105	63	0.99	0.36432	0.41973	0.40063	0.42333	0.4124	0.46606
cd01594	492.191	203275	413	321	0.73	0.3668	0.42892	0.38211	0.49979	0.46052	0.44495
cd00052	844.172	48962	58	67	1.23	0.36925	0.35565	0.36602	0.35971	0.34486	0.36539
cd00037	924.444	788551	853	115	0.7	0.37323	0.37272	0.36917	0.36922	0.36623	0.38161
cd00111	708.44	35422	50	44	1.42	0.37398	0.38163	0.34062	0.36951	0.34443	0.35796
cd00014	920.37	49700	54	107	0.9	0.3756	0.36147	0.38117	0.388	0.37661	0.36892
cd00118	460.064	1103693	2399	45	0.95	0.37609	0.34405	0.34543	0.33362	0.3431	0.34102
cd00077	450.613	111752	248	146	0.52	0.37851	0.40251	0.38558	0.3978	0.39639	0.39955
cd00838	352.44	52866	150	199	0.44	0.38009	0.38538	0.38837	0.3883	0.38169	0.38913
cd00741	479.497	82953	173	152	0.67	0.384	0.42487	0.39127	0.36641	0.42235	0.40446
cd00551	710.299	139929	197	363	0.56	0.40024	0.40876	0.39556	0.39842	0.3884	0.37231
cd00043	409.523	134733	329	89	0.69	0.40417	0.33133	0.41068	0.32017	0.32875	0.40583
cd00590	475.367	223898	471	72	0.72	0.40438	0.40755	0.40542	0.41279	0.4208	0.39861
cd02409	284.825	76333	268	67	0.69	0.40507	0.43183	0.43044	0.40785	0.43279	0.37453
cd00200	633.549	57653	91	289	0.87	0.40725	0.40831	0.24838	0.39905	0.41331	0.40811
cd00117	220.662	17653	80	81	1.06	0.40927	0.37741	0.41043	0.37777	0.41835	0.38476
cd07976	334.235	28410	85	316	0.75	0.41011	0.40981	0.38677	0.40658	0.39578	0.41229
cd09693	238.976	30111	126	204	0.68	0.41087	0.42812	0.4137	0.4086	0.4625	0.39968
cd00198	854.849	141905	166	161	0.54	0.41732	0.41366	0.4046	0.42965	0.42895	0.41172
cd00201	740.133	99918	135	31	1.29	0.42268	0.44904	0.4623	0.44998	0.44911	0.45085
cd00719	270.317	16219	60	69	0.79	0.42603	0.42329	0.42807	0.39527	0.41521	0.52293
cd00229	442.266	83146	188	188	0.45	0.43249	0.43734	0.42938	0.4441	0.44293	0.43736
cd14948	650.08	612375	942	83	0.74	0.4338	0.42394	0.41674	0.43166	0.40133	0.42383
cd11296	631.21	63121	100	338	0.53	0.43492	0.44605	0.43137	0.43488	0.45302	0.43856
cd02065	534.04	66755	125	125	0.83	0.43623	0.39673	0.46181	0.42184	0.45184	0.47019
cd00104	625.077	170646	273	41	1.09	0.43739	0.4223	0.44197	0.41723	0.43312	0.39815
cd06974	349.249	61817	177	163	0.9	0.43798	0.46897	0.44919	0.45442	0.45363	0.45545
cd00161	577.2	60606	105	123	0.79	0.44386	0.45279	0.44482	0.40814	0.44989	0.21685
cd05819	688.013	110082	160	271	0.84	0.44549	0.43543	0.44613	0.27675	0.4377	0.43647
cd01901	347.753	231951	667	163	0.63	0.44623	0.42673	0.39307	0.44227	0.43334	0.38849
cd08168	276.728	28503	103	87	0.97	0.44668	0.44809	0.3918	0.43799	0.45291	0.44922
cd06224	1098.91	98902	90	122	0.75	0.4602	0.51456	0.47925	0.4823	0.4908	0.478
cd04519	1143.03	86870	76	257	0.66	0.46032	0.45815	0.46022	0.44406	0.45738	0
cd00761	394.431	114385	290	190	0.51	0.46454	0.47074	0.47692	0.46558	0.47713	0.47196
cd00531	228.344	37220	163	127	0.58	0.46739	0.4965	0.43288	0.37833	0.48557	0.4745
cd00121	599.261	211539	353	126	0.68	0.46818	0.44476	0.47537	0.46046	0.46333	0.45035
cd02116	462.894	752665	1626	60	0.54	0.46882	0.47057	0.46673	0.47269	0.47976	0.46701
cd00136	451.853	30726	68	70	0.77	0.4689	0.48817	0.46196	0.47575	0.45959	0.45749
cd00538	667.534	38717	58	127	0.7	0.47044	0.48228	0.47635	0.42942	0.49213	0.48059
cd00024	1052.53	128409	122	55	0.91	0.47108	0.46417	0.45274	0.48028	0.43203	0.4805
cd00385	417.966	135839	325	243	0.56	0.47298	0.3874	0.31952	0.46717	0.46698	0.49256
cd00598	543.621	31530	58	325	0.75	0.47841	0.4714	0.48676	0.48089	0.46798	0.45291
cd00048	571.574	88594	155	68	0.91	0.48103	0.48499	0.46539	0.46566	0.47229	0.48449
cd07812	184.684	36198	196	141	0.47	0.48152	0.47893	0.47287	0.48308	0.47646	0.48348
cd07307	603.79	37435	62	194	0.6	0.4824	0.48412	0.47167	0.48894	0.44814	0.54038
cd14752	861.653	506652	588	203	0.53	0.48676	0.53583	0.51378	0.53368	0.53035	0.48577
cd07440	488.931	28358	58	113	0.89	0.49077	0.58237	0.56339	0.6191	0.5836	0.57421
cd00636	332.198	122249	368	148	0.5	0.49113	0.37209	0.41003	0.47475	0.55491	0.52089
cd00042	208.113	11030	53	101	1.01	0.4936	0.5528	0.48497	0.47985	0.4373	0.51394
cd00371	656.217	69559	106	63	1.05	0.49484	0.55227	0.57576	0.50412	0.52492	0.55364
cd00060	712.789	101216	142	102	0.75	0.50005	0.54052	0.52944	0.53268	0.53297	0.52803
cd06567	582.608	286643	492	334	0.66	0.50628	0.51411	0.51685	0.51629	0.52989	0.51303
cd00196	408.288	256405	628	69	0.48	0.50751	0.45609	0.51956	0.50278	0.51281	0.52334
cd00253	1173.42	89180	76	185	0.8	0.50901	0.52772	0.49011	0.4963	0.50829	0.50309
cd00306	686.336	188056	274	233	0.61	0.51365	0.51592	0.51645	0.50928	0.52024	0.52485
cd00030	824.784	431362	523	102	0.66	0.51558	0.51627	0.51666	0.50919	0.51837	0.51869
cd09652	257.393	15701	61	189	0.72	0.51899	0.52825	0.51911	0.52576	0.53781	0.51165
cd04369	911.724	254371	279	99	0.8	0.52165	0.54135	0.54245	0.53615	0.5339	0.52652
cd00267	480.86	89440	186	208	0.74	0.52842	0.53021	0.53151	0.53281	0.52402	0.52304
cd01391	479.295	61829	129	279	0.5	0.53601	0.55349	0.49024	0.5006	0.47548	0.50696
cd00173	742.909	261504	352	78	0.78	0.53706	0.5245	0.53144	0.5069	0.50252	0.52156
cd02205	340.76	147549	433	113	0.6	0.53933	0.53596	0.54842	0.53186	0.54657	0.5387
cd01081	323.983	18791	58	283	0.79	0.53964	0.51174	0.53769	0.53783	0.50911	0.51745
cd11709	1688.43	168843	100	117	0.85	0.53973	0.5163	0.53224	0.54337	0.54372	0.48982
cd00618	209.216	21340	102	81	0.96	0.5407	0.4873	0.5019	0.52562	0.54256	0.53169
cd01427	260.443	91676	352	201	0.54	0.54119	0.55059	0.52526	0.54894	0.54286	0.56101
cd01342	655.564	607708	927	83	0.62	0.54184	0.56171	0.55235	0.55029	0.54898	0.5467
cd00070	297.707	27389	92	127	1.01	0.54357	0.52949	0.54321	0.55097	0.54522	0.53959
cd12148	768.811	1667552	2169	409	0.38	0.54375	0.53712	0.55685	0.54208	0.54348	0.54476
cd02440	370.214	38132	103	142	0.51	0.5457	0.53027	0.51181	0.47839	0.57158	0.54988
cd00080	664.472	305657	460	71	0.9	0.55004	0.51808	0.54384	0.51832	0.54335	0.49775
cd02257	902.932	279006	309	321	0.7	0.55842	0.55733	0.55846	0.56771	0.56568	0.55444
cd02883	207.35	41470	200	123	0.64	0.5592	0.58578	0.57815	0.58362	0.59699	0.59807
cd00188	635.282	388157	611	83	0.57	0.55936	0.58593	0.5525	0.56442	0.57449	0.5514
cd00593	644.52	127615	198	133	0.94	0.55949	0.55653	0.564	0.57639	0.56467	0.56528
cd00299	266.874	36028	135	100	0.52	0.55972	0.53345	0.56792	0.56754	0.5305	0.57421
cd04371	820.57	158370	193	81	0.83	0.56307	0.55998	0.57179	0.55826	0.56844	0.55307
cd00397	343.663	56017	163	166	0.63	0.56543	0.57909	0.57157	0.57446	0.5744	0.56622
cd09212	648.326	89469	138	96	0.71	0.57065	0.56072	0.56983	0.56954	0.56077	0.56911
cd07040	332.627	141699	426	205	0.6	0.57179	0.55381	0.53315	0.57102	0.55449	0.5685
cd03128	377.622	652909	1729	92	0.49	0.57191	0.54975	0.5538	0.57331	0.57908	0.55866
cd00101	143.159	18897	132	82	0.86	0.57373	0.62783	0.57388	0.6224	0.62139	0.58227
cd00368	814.607	285927	351	475	0.7	0.57939	0.58255	0.57584	0.58146	0.58452	0.57815
cd00516	366.989	68260	186	262	0.85	0.58126	0.58003	0.60611	0.56828	0.61873	0.55207
cd00185	635.912	72494	114	85	0.91	0.58185	0.59558	0.57523	0.5765	0.57021	0.57539
cd06167	322.265	86367	268	151	0.57	0.58382	0.59362	0.55433	0.59443	0.59905	0.5473
cd00174	744.598	384957	517	51	1.08	0.58422	0.58084	0.59555	0.58641	0.58614	0.58689
cd00046	979.428	224289	229	146	0.74	0.58821	0.61367	0.56675	0.62495	0.58945	0.59148
cd01066	379.495	39088	103	208	0.7	0.58883	0.60204	0.59952	0.59846	0.59887	0.60089
cd00322	396.184	34468	87	223	0.7	0.59083	0.58015	0.5861	0.59115	0.5822	0.58641
cd00945	266.271	31420	118	200	0.89	0.59248	0.62549	0.65112	0.62707	0.64118	0.63159
cd03440	261.528	482780	1846	100	0.45	0.59306	0.57824	0.58449	0.60779	0.59281	0.58742
cd11308	822.733	61705	75	76	1.38	0.59373	0.58955	0.58888	0.59213	0.5941	0.58984
cd00882	344.293	51644	150	160	0.66	0.5959	0.55355	0.61913	0.60381	0.57978	0.58343
cd00170	535.555	58911	110	157	0.71	0.59651	0.6206	0.61444	0.61934	0.6253	0.61887
cd00413	379.477	32635	86	212	0.8	0.59994	0.58791	0.58342	0.57073	0.57555	0.57685
cd06560	357.02	17851	50	166	0.77	0.60021	0.61077	0.59476	0.6072	0.60887	0.59575
cd03467	273.353	41823	153	98	0.78	0.60205	0.58599	0.59759	0.58438	0.60468	0.60424
cd06261	317.798	80403	253	191	0.51	0.60351	0.60162	0.59379	0.60265	0.60262	0.58688
cd06587	170.075	54424	320	113	0.62	0.60469	0.64153	0.64514	0.63128	0.64549	0.65031
cd00985	215.425	38992	181	178	0.88	0.60484	0.59201	0.64218	0.68547	0.51468	0.66391
cd00374	263.247	25535	97	195	0.96	0.60488	0.62467	0.61487	0.61941	0.64616	0.62478
cd00133	395.211	179821	455	85	0.68	0.60787	0.59839	0.6311	0.54658	0.59131	0.65289
cd00085	312.869	38170	122	58	0.81	0.60814	0.57812	0.61372	0.60908	0.63603	0.61427
cd00038	524.799	153766	293	115	0.65	0.61082	0.62149	0.58094	0.55263	0.60562	0.62915
cd00047	907.069	92521	102	231	1.23	0.61551	0.6025	0.61213	0.61698	0.61971	0.61829
cd00079	784.008	102705	131	131	0.83	0.6197	0.69422	0.68954	0.69246	0.62556	0.65915
cd00329	733.902	216501	295	106	0.78	0.62476	0.43	0.4605	0.60419	0.47627	0.68137
cd14262	237.495	23512	99	173	0.77	0.62748	0.65195	0.61546	0.62978	0.6299	0.6305
cd13394	660.37	35660	54	618	0.94	0.63001	0.64218	0.61836	0.62545	0.64108	0.63312
cd06174	474.433	209225	441	390	0.4	0.63087	0.62838	0.64084	0.62911	0.62347	0.61819
cd00296	414.361	50552	122	219	0.98	0.63112	0.61886	0.62571	0.63934	0.60874	0.62099
cd00134	340.381	21444	63	219	0.81	0.64791	0.63697	0.63459	0.64562	0.6461	0.6383
cd00653	1227.25	138679	113	1088	1.09	0.64969	0.65538	0.65008	0.65266	0.63836	0.6465
cd12144	552.69	32056	58	114	1.32	0.65026	0.79813	0.82947	0.67799	0.69742	0.71842
cd00084	454.668	87751	193	66	0.96	0.65623	0.65285	0.65307	0.6523	0.65702	0.65099
cd12082	478.623	25367	53	422	0.68	0.65742	0.65427	0.63986	0.65601	0.66947	0.62921
cd03493	154.792	50617	327	98	0.55	0.65888	0.67541	0.65153	0.66416	0.69816	0.69452
cd13778	455.21	56446	124	155	0.84	0.65891	0.64082	0.63756	0.64725	0.65032	0.64124
cd09731	187.983	11091	59	141	0.88	0.6591	0.65625	0.656	0.64686	0.66034	0.60135
cd00029	912.74	45637	50	50	1.18	0.65988	0.66253	0.66344	0.666	0.66281	0.63754
cd06561	243.12	42546	175	198	0.76	0.66341	0.65277	0.65315	0.64472	0.69058	0.66493
cd05709	368.014	152358	414	202	0.76	0.66436	0.70028	0.64079	0.68327	0.65676	0.66874
cd00143	507.239	69999	138	257	0.83	0.66509	0.68217	0.69149	0.68122	0.69276	0.66699
cd07177	251.447	90018	358	104	0.59	0.66613	0.71116	0.67871	0.67735	0.68503	0.70639
cd00207	342.393	67109	196	84	0.89	0.66628	0.65343	0.6516	0.66991	0.65606	0.65069
cd02439	364.342	58659	161	315	1.1	0.67275	0.68335	0.7121	0.62762	0.66028	0.69399
cd14473	1150.88	356772	310	99	0.8	0.674	0.67692	0.68211	0.69287	0.67088	0.66972
cd06550	331.241	26168	79	261	0.8	0.67447	0.71858	0.71985	0.70405	0.67419	0.6836
cd14798	871.782	88050	101	124	0.92	0.6803	0.6769	0.65838	0.69865	0.68151	0.70608
cd03333	650.946	217416	334	251	0.95	0.68212	0.74739	0.75574	0.71825	0.73529	0.74323
cd00160	1097.66	73543	67	180	0.88	0.68317	0.71831	0.68954	0.69567	0.68885	0.68466
cd06222	484.917	40733	84	121	0.87	0.68566	0.68277	0.69121	0.67027	0.68958	0.66936
cd05188	389.805	77961	200	275	0.75	0.68675	0.67998	0.67764	0.67903	0.6797	0.66682
cd00352	661.687	422156	638	220	0.78	0.68743	0.36845	0.6541	0.67691	0.68676	0.66469
cd00090	198.078	35456	179	77	0.72	0.68799	0.6645	0.6829	0.68565	0.69643	0.6857
cd00316	500.708	77109	154	403	0.86	0.68982	0.67228	0.68399	0.68072	0.69899	0.68134
cd06260	206.097	76256	370	155	0.67	0.69325	0.65597	0.70979	0.70815	0.67459	0.68533
cd00501	217.316	12387	57	195	1.21	0.69948	0.69308	0.69348	0.70262	0.70286	0.70788
cd05992	547.312	84286	154	81	0.79	0.69966	0.71962	0.70084	0.68257	0.71114	0.6828
cd07980	321.15	25692	80	123	0.98	0.69974	0.70414	0.698	0.68448	0.70758	0.69739
cd06223	268.35	292502	1090	130	0.54	0.6998	0.63743	0.65609	0.66877	0.67084	0.67605
cd11375	274.699	28294	103	173	1	0.70174	0.70439	0.70707	0.72117	0.7085	0.6963
cd03127	257.283	29073	113	90	0.83	0.70242	0.75251	0.73398	0.72324	0.74657	0.71229
cd00056	290.028	40894	141	154	0.86	0.70527	0.69818	0.69544	0.67681	0.70399	0.6902
cd00379	213.415	47805	224	155	0.82	0.70531	0.69625	0.73551	0.72362	0.73827	0.73687
cd06093	587.464	121605	207	106	0.71	0.70657	0.68868	0.69895	0.71319	0.70755	0.71929
cd10146	290.326	65033	224	69	0.98	0.70813	0.72252	0.73911	0.73097	0.74219	0.73623
cd10316	632.903	39240	62	92	1.18	0.70879	0.71091	0.68482	0.66353	0.65948	0.74119
cd00594	540.86	69771	129	270	0.82	0.71011	0.72199	0.69375	0.70516	0.70984	0.71654
cd06462	223.036	177537	796	85	0.77	0.71198	0.72674	0.68874	0.72119	0.67792	0.71978
cd00021	551.5	30884	56	39	1.24	0.7128	0.70385	0.70543	0.70555	0.71037	0.71131
cd09487	489.194	50387	103	56	0.88	0.71398	0.72651	0.73507	0.71764	0.74638	0.73932
cd00158	255.282	79648	312	89	0.83	0.715	0.73912	0.73704	0.73375	0.72835	0.73256
cd00351	338.857	23720	70	219	1.4	0.7151	0.78275	0.76875	0.79366	0.76225	0.74713
cd00075	646.349	312833	484	104	0.81	0.71562	0.73072	0.73116	0.72834	0.73868	0.70563
cd06661	202.281	45311	224	99	0.76	0.71931	0.73415	0.70353	0.72986	0.72581	0.71086
cd02325	528.98	159752	302	60	0.84	0.71959	0.72108	0.74064	0.72907	0.7416	0.73802
cd01610	317.869	199304	627	120	0.6	0.71973	0.73412	0.73995	0.72019	0.7345	0.73049
cd06845	231.31	20124	87	144	0.88	0.71977	0.71125	0.72598	0.72295	0.72018	0.71847
cd00305	183.809	12499	68	144	1.21	0.72015	0.71891	0.71138	0.70543	0.70863	0.69979
cd07765	548.298	62506	114	40	1.27	0.72027	0.71883	0.71186	0.71537	0.71824	0.71239
cd09233	1730.88	96929	56	356	1.04	0.72264	0.70926	0.66852	0.72454	0.71451	0.7161
cd00567	449.371	31456	70	370	0.87	0.72268	0.7167	0.71577	0.71212	0.71445	0.71413
cd02775	828.659	323177	390	101	0.74	0.72287	0.72943	0.72469	0.71401	0.73118	0.73132
cd00165	282.007	75296	267	74	0.73	0.72347	0.72702	0.70634	0.72098	0.73086	0.73308
cd00568	574.053	76349	133	168	0.88	0.72385	0.74159	0.7292	0.73917	0.73327	0.73945
cd14947	650.338	128767	198	113	1.05	0.72782	0.74855	0.74333	0.74484	0.72708	0.73724
cd13777	431.09	52593	122	128	0.98	0.72866	0.72402	0.73406	0.72502	0.7153	0.72209
cd00382	254.311	41707	164	159	1	0.72892	0.7459	0.74049	0.75969	0.75121	0.74883
cd00317	284.859	26207	92	146	1.1	0.73029	0.70768	0.69924	0.7251	0.72187	0.71205
cd00421	270.374	39745	147	152	1.01	0.73118	0.71091	0.72618	0.73421	0.71331	0.72878
cd09727	221.667	11305	51	210	1.06	0.73613	0.74317	0.75131	0.72643	0.74026	0.73358
cd00537	380.684	30074	79	274	1.04	0.73731	0.73946	0.74642	0.74518	0.73455	0.74612
cd11380	210.309	28602	136	138	1.48	0.73752	0.6728	0.66202	0.73175	0.74289	0.74538
cd06259	249.102	111847	449	151	0.75	0.73785	0.72555	0.72812	0.70002	0.71226	0.70993
cd00995	555.994	197378	355	464	0.72	0.73897	0.73915	0.73506	0.73742	0.73727	0.74253
cd06971	173.756	29191	168	143	1.02	0.74031	0.77628	0.77546	0.77335	0.77616	0.7692
cd00403	286.624	61051	213	206	0.93	0.74133	0.79062	0.76778	0.72882	0.76044	0.79077
cd00588	408.17	21633	53	135	0.87	0.74457	0.71181	0.7344	0.69443	0.71161	0.70171
cd00326	363.299	64304	177	227	1.07	0.74825	0.74176	0.75197	0.74014	0.738	0.73585
cd00181	510.295	31128	61	128	0.73	0.74849	0.72994	0.71982	0.71041	0.72566	0.75773
cd00073	229.789	16315	71	89	1.4	0.75786	0.75178	0.77469	0.79085	0.7765	0.79062
cd09030	130.822	9550	73	102	0.93	0.75876	0.76495	0.79768	0.75732	0.74859	0.74703
cd00449	319.979	30398	95	255	0.98	0.75945	0.76823	0.77015	0.78748	0.77368	0.74018
cd12927	150.827	23529	156	103	0.89	0.75953	0.73376	0.73355	0.79119	0.76149	0.73261
cd10147	431.874	140791	326	145	0.63	0.76113	0.75034	1e-05	0.75429	0.70683	0.77137
cd06071	2133.4	149338	70	277	1.37	0.76133	0.73076	0.75678	0.75136	0.74653	0.72484
cd02062	253.324	18746	74	158	0.86	0.76182	0.75252	0.75801	0.73808	0.75361	0.74344
cd00448	202.237	172508	853	107	0.88	0.76333	0.77098	0.76641	0.75554	0.76292	0.75623
cd00179	283.1	19817	70	152	1.24	0.76358	0.75433	0.77477	0.73821	0.78991	0.72044
cd00657	219.88	29244	133	126	0.63	0.76432	0.79266	0.76418	0.77238	0.77123	0.76085
cd00432	180.706	24576	136	103	1.06	0.76609	0.77373	0.80662	0.79726	0.76702	0.77995
cd12870	94.8889	6832	72	66	1.02	0.76658	0.81522	0.79035	0.79025	0.76081	0.80717
cd00086	487.836	155132	318	59	1.01	0.76662	0.74171	0.76103	0.71727	0.76978	0.76069
cd00159	799.646	144736	181	169	0.79	0.76842	0.75602	0.76589	0.76702	0.76719	0.75682
cd00431	213.873	43630	204	162	0.81	0.76951	0.8029	0.78977	0.80888	0.78117	0.8087
cd00577	281.911	22271	79	249	0.89	0.77022	0.75977	0.76454	0.77556	0.76378	0.77487
cd03174	483.123	475393	984	265	0.93	0.77381	0.81916	0.78489	0.74007	0.84571	0.82582
cd00186	848.635	53464	63	417	1.07	0.77554	0.77057	0.77481	0.77311	0.77224	0.77316
cd06157	339.772	19367	57	166	0.8	0.77562	0.76699	0.75437	0.73306	0.75819	0.7599
cd06578	327.454	136221	416	240	0.67	0.77698	0.76503	0.773	0.77229	0.76902	0.76325
cd00298	224.453	257448	1147	85	0.72	0.77888	0.79776	0.77665	0.77384	0.80385	0.80257
cd00338	470.167	84630	180	137	0.79	0.77918	0.78345	0.7673	0.77321	0.76179	0.77473
cd00400	564.212	63756	113	385	0.84	0.78067	0.78427	0.77456	0.79066	0.78605	0.77697
cd00115	168.671	12313	73	141	1.1	0.78071	0.79193	0.78251	0.7605	0.74469	0.74978
cd00640	398.342	127071	319	289	0.81	0.78071	0.76458	0.77894	0.75714	0.73675	0.76806
cd14251	654.87	45186	69	370	1.21	0.78091	0.74581	0.75629	0.77468	0.77567	0.77635
cd06583	357.452	103661	290	125	0.87	0.783	0.75656	0.76051	0.75686	0.79168	0.76594
cd00433	504.699	98921	196	469	1.05	0.78452	0.78235	0.78428	0.77612	0.77366	0.77362
cd07995	241.026	64113	266	208	0.88	0.78459	0.77957	0.77684	0.78815	0.78597	0.78813
cd04332	307.653	152288	495	136	0.75	0.78617	0.79949	0.83492	0.77969	0.79541	0.79153
cd01433	170.468	26593	156	112	1.16	0.78717	0.81466	0.81085	0.78991	0.81848	0.7735
cd15481	595.855	41114	69	195	0.96	0.78748	0.76338	0.79029	0.75975	0.76237	0.79544
cd00386	273.382	46475	170	186	0.98	0.79035	0.79055	0.77341	0.7953	0.79225	0.79755
cd00107	70.2549	3583	51	33	1.08	0.7917	0.82328	0.78818	0.80529	0.82113	0.75316
cd00392	173.677	23099	133	114	1.3	0.79408	0.77064	0.86917	0.75488	0.86195	0.79017
cd00083	385.74	56318	146	60	0.91	0.79635	0.80613	0.80258	0.78883	0.78679	0.8138
cd06664	161.903	33514	207	122	1.05	0.79759	0.80444	0.82345	0.79818	0.80568	0.80071
cd00178	203.808	10598	52	172	1.09	0.79791	0.76841	0.76777	0.77457	0.7812	0.76585
cd09634	356.183	50578	142	318	0.94	0.79931	0.80266	0.80621	0.81064	0.7989	0.79684
cd06534	513.397	34911	68	427	1.02	0.80105	0.80432	0.80616	0.79585	0.79533	0.80724
cd00190	374.011	66574	178	232	1.07	0.80178	0.82157	0.81425	0.80773	0.80773	0.80968
cd04301	220.602	209351	949	65	0.62	0.80246	0.79839	0.77291	0.79714	0.77425	0.7972
cd00082	641.8	297795	464	65	0.75	0.80459	0.78876	0.80019	0.80212	0.78768	0.79851
cd02153	554.82	89326	161	98	1.12	0.80473	0.88869	0.89101	0.86967	0.80459	0.8489
cd06225	597.078	122401	205	48	0.76	0.80561	0.81421	0.81459	0.80708	0.79767	0.82356
cd11377	748.2	52374	70	138	0.91	0.80685	0.78139	0.79234	0.78887	0.80235	0.80761
cd00195	314.408	22323	71	141	1.16	0.81013	0.79405	0.7908	0.77248	0.78006	0.8
cd00504	1048.9	76570	73	156	1.34	0.81022	0.80576	0.77817	0.76787	0.81221	0.78304
cd14785	391.549	39938	102	371	1.09	0.81053	0.79695	0.8252	0.79443	0.80873	0.81913
cd00119	200.412	10221	51	124	1.6	0.81205	0.79162	0.80783	0.81525	0.80411	0.78253
cd12843	240.517	13950	58	106	1.08	0.81626	0.8199	0.81116	0.82295	0.81407	0.80926
cd07828	220.042	15623	71	148	1.12	0.81671	0.83477	0.8252	0.8324	0.81847	0.82864
cd07025	324.564	66211	204	281	0.94	0.81857	0.81737	0.81714	0.81321	0.81809	0.81466
cd06660	333.381	383055	1149	286	0.84	0.82202	0.81454	0.80795	0.81796	0.80952	0.82578
cd00010	188.343	12619	67	63	1.03	0.82221	0.83135	0.81921	0.79693	0.80351	0.8225
cd00187	982.224	56969	58	444	1.47	0.82262	0.74102	0.82019	0.87406	0.84534	0.86144
cd14745	737.333	37604	51	329	1.31	0.82326	0.81877	0.8225	0.83615	0.83115	0.81985
cd00127	358.731	18654	52	139	1.17	0.8253	0.82858	0.84032	0.83803	0.82906	0.83177
cd00065	816.788	320181	392	52	1.05	0.82583	0.79331	0.81526	0.81328	0.82214	0.81567
cd00320	118.48	11611	98	93	1.21	0.82595	0.83177	0.82858	0.81967	0.83696	0.81713
cd00387	156.744	20220	129	125	1.15	0.82637	0.83232	0.82398	0.82607	0.83264	0.8273
cd12152	146.54	48065	328	123	0.84	0.82672	0.82246	0.8492	0.8493	0.83788	0.82476
cd11378	215.408	16371	76	113	0.99	0.82722	0.80381	0.82088	0.81948	0.81552	0.81246
cd00156	388.727	119728	308	113	0.85	0.82744	0.82564	0.83573	0.8351	0.82406	0.82078
cd00321	420.476	44150	105	159	1.19	0.82761	0.86128	0.85116	0.85187	0.84043	0.84593
cd15457	272.136	213355	784	152	1.09	0.83159	0.82804	0.82054	0.81162	0.81356	0.8232
cd04100	562.567	118139	210	87	1.04	0.83821	0.8628	0.85709	0.86631	0.82683	0.8393
cd00032	389.094	20622	53	244	1.27	0.83877	0.84747	0.8388	0.83717	0.82215	0.84778
cd00162	538.016	299137	556	45	1.08	0.83886	0.82272	0.84375	0.83278	0.84043	0.83433
cd00211	377.491	41524	110	136	0.89	0.83894	0.82979	0.83654	0.83525	0.83755	0.83527
cd01392	339.942	459602	1352	52	1.12	0.84012	0.83901	0.83714	0.83768	0.83815	0.8371
cd06911	292.681	40390	138	86	1.03	0.84207	0.84709	0.83451	0.84185	0.83772	0.83957
cd00172	424.793	39081	92	364	0.96	0.84272	0.84416	0.83421	0.83971	0.8365	0.84715
cd12151	297.966	61679	207	282	0.96	0.84278	0.8236	0.83787	0.83868	0.85845	0.83113
cd14458	383.746	24176	63	105	1.25	0.8439	0.83729	0.84755	0.86183	0.84757	0.85598
cd09281	196.399	37905	193	123	1.21	0.84801	0.82051	0.81599	0.81152	0.81469	0.84006
cd00087	563.983	32711	58	215	1.44	0.84905	0.85692	0.87072	0.85959	0.85399	0.85443
cd06559	252.377	30790	122	208	1.21	0.84917	0.86029	0.8503	0.85847	0.85365	0.85479
cd06558	336.511	234548	697	195	0.78	0.85324	0.84242	0.84197	0.83128	0.84288	0.83941
cd00350	164.315	11995	73	36	1.5	0.85328	0.82617	0.79303	0.80518	0.77464	0.78575
cd00562	230.58	25825	112	102	0.85	0.85541	0.85331	0.83994	0.84009	0.84181	0.84875
cd00518	173.236	34474	199	140	0.85	0.85553	0.87421	0.87369	0.85223	0.87148	0.85807
cd01425	266.953	45649	171	211	1.2	0.85861	0.86518	0.86959	0.87114	0.86427	0.86995
cd02696	383.424	200531	523	174	1	0.85862	0.86631	0.86781	0.85884	0.86237	0.86927
cd00209	206.648	26451	128	157	1.18	0.86108	0.86785	0.8579	0.85437	0.86333	0.85848
cd00641	345.518	38007	110	193	1.42	0.86367	0.86919	0.87132	0.89037	0.8825	0.88496
cd00093	202.231	112845	558	58	0.72	0.86482	0.8641	0.86528	0.86551	0.86453	0.86552
cd10747	395.8	172569	436	222	1.08	0.86533	0.86201	0.86687	0.8658	0.86408	0.86644
cd08044	713.5	48518	68	133	1.05	0.86696	0.87272	0.87565	0.85887	0.8573	0.88065
cd08010	359.597	24093	67	246	1.21	0.87056	0.86402	0.85936	0.86773	0.86017	0.86051
cd08768	472.77	28839	61	87	0.98	0.87148	0.86885	0.87831	0.85607	0.85452	0.84326
cd11660	419.916	39892	95	50	1.41	0.87194	0.84979	0.88104	0.8564	0.87642	0.88305
cd11572	396.008	94250	238	99	1.09	0.87335	0.87276	0.89328	0.90133	0.89078	0.90128
cd05466	299.712	105199	351	197	0.69	0.87343	0.86574	0.87903	0.86903	0.87684	0.86812
cd03587	388.083	60541	156	41	1.23	0.87352	0.92682	0.90313	0.90253	0.89117	0.89382
cd07153	147.014	54395	370	116	0.95	0.87609	0.87416	0.87497	0.87426	0.87202	0.87908
cd07185	355.553	372264	1047	106	0.94	0.87656	0.86237	0.86228	0.86568	0.86576	0.86277
cd00067	714.563	85033	119	36	1.34	0.88248	0.90036	0.88466	0.89579	0.87959	0.89544
cd00069	147.736	21274	144	95	1.32	0.88248	0.85151	0.88216	0.87609	0.88454	0.86717
cd06445	172.34	65317	379	79	1.2	0.88742	0.89598	0.87946	0.89611	0.88797	0.89929
cd00633	140.945	7752	55	67	1.04	0.88814	0.87317	0.87452	0.88857	0.87553	0.88272
cd13433	1560.33	113904	73	54	1.52	0.88832	0.90049	0.88752	0.90061	0.89788	0.90692
cd14660	369.825	35873	97	105	1.22	0.88834	0.87735	0.87504	0.89732	0.88736	0.88213
cd08048	234.1	11705	50	84	1.52	0.8903	0.89092	0.89814	0.89581	0.90199	0.89477
cd08774	314.32	31432	100	225	1.29	0.89082	0.87505	0.88202	0.88646	0.88117	0.88228
cd07323	507.581	31470	62	75	1.28	0.89113	0.89783	0.89131	0.88047	0.89269	0.8908
cd07557	197.642	57909	293	91	1.01	0.89114	0.89	0.88082	0.88717	0.87423	0.89547
cd00291	142.021	27410	193	69	0.96	0.89128	0.88654	0.89196	0.88688	0.8974	0.90729
cd00487	184.603	28798	156	140	1.24	0.89426	0.89377	0.90103	0.88955	0.89782	0.90457
cd00213	264.23	35671	135	88	1.37	0.89622	0.93252	0.8946	0.91998	0.91193	0.89855
cd01614	92.7286	6491	70	83	1.23	0.89741	0.90441	0.89274	0.9213	0.91901	0.89347
cd09725	93.3471	11295	121	79	1.19	0.89757	0.89545	0.89603	0.89225	0.90053	0.89856
cd00349	160.616	22165	138	131	1.32	0.90177	0.91134	0.92954	0.92412	0.9241	0.91103
cd00462	198.169	30518	154	171	1.25	0.90366	0.90537	0.90644	0.90505	0.88718	0.90735
cd00383	241.794	126700	524	94	1.01	0.90549	0.90555	0.90909	0.89732	0.89998	0.91034
cd00140	378.741	42419	112	365	0.98	0.90805	0.90244	0.90565	0.89632	0.90388	0.9027
cd00580	124.491	6598	53	113	1.17	0.90845	0.90156	0.89476	0.91947	0.90887	0.91821
cd02407	156.456	8918	57	115	1.42	0.90862	0.94978	0.90767	0.94098	0.91125	0.94699
cd09916	164.932	12040	73	96	0.91	0.90932	0.91378	0.93923	0.92288	0.91087	0.92365
cd10148	99.0672	13275	134	80	1.16	0.91195	0.90105	0.88099	0.90718	0.9201	0.90878
cd10719	394.607	147583	374	65	1.25	0.91304	0.90087	0.86228	0.8768	0.90833	0.87805
cd06257	407.604	62771	154	55	1.24	0.91385	0.94389	0.91037	0.90364	0.91197	0.91215
cd00446	205.358	31009	151	136	1.13	0.91486	0.93393	0.9245	0.92602	0.92577	0.94125
cd12212	153.875	8617	56	115	1.32	0.9162	0.91676	0.9097	0.91426	0.91986	0.92019
cd11586	77.35	4641	60	54	0.87	0.91774	0.91637	0.90418	0.9004	0.90557	0.90205
cd00495	200.636	89885	448	90	1.03	0.92181	0.92408	0.90672	0.90634	0.90911	0.91755
cd00412	223.374	20327	91	155	1.42	0.92232	0.90937	0.89873	0.92379	0.93646	0.9439
cd07304	375.771	54111	144	344	1.39	0.92572	0.92123	0.93399	0.91851	0.92142	0.92883
cd12934	581.014	40671	70	37	1.31	0.92679	0.91967	0.95027	0.94516	0.94044	0.93658
cd06572	449.423	87188	194	390	1.35	0.92814	0.92823	0.93013	0.93188	0.92439	0.93033
cd06571	398.213	78448	197	90	1.1	0.92885	0.92503	0.92414	0.92988	0.92826	0.92906
cd00552	165.594	23680	143	91	1.05	0.93023	0.93276	0.92831	0.93595	0.92788	0.93385
cd00756	172.124	24958	145	124	1.2	0.93168	0.93889	0.93832	0.92943	0.93661	0.94025
cd00336	173.158	23030	133	105	1.12	0.93823	0.92924	0.92553	0.93919	0.91397	0.93067
cd00483	236.346	24580	104	128	1.31	0.9393	0.9391	0.93812	0.93935	0.93973	0.94401
cd00367	297.538	35407	119	77	1.1	0.94016	0.94153	0.94018	0.94092	0.94067	0.93705
cd00361	382.833	22970	60	221	1.57	0.94078	0.95547	0.9592	0.97228	0.96007	0.96832
cd13944	405.431	131765	325	275	1.2	0.94119	0.94364	0.94064	0.9437	0.9459	0.94017
cd14438	356.654	18546	52	41	1.47	0.94478	0.9453	0.94563	0.9485	0.94053	0.94412
cd09804	365.073	20079	55	121	1.35	0.9449	0.93738	0.93643	0.94382	0.93861	0.94048
cd08026	122.163	11972	98	102	1.1	0.94631	0.94538	0.94234	0.94058	0.94412	0.94488
cd01514	718.906	259525	361	79	1.04	0.94805	0.95443	0.96133	0.95132	0.94987	0.95863
cd06916	456.136	26912	59	72	1.86	0.94928	0.94131	0.94374	0.94494	0.93854	0.93619
cd00475	261.873	175717	671	219	1.34	0.95031	0.94826	0.94794	0.95429	0.94643	0.95073
cd00488	114.327	12919	113	76	1.31	0.95066	0.96689	0.96735	0.95192	0.96622	0.96735
cd00513	140.161	7849	56	107	1.59	0.95869	0.96829	0.95395	0.97409	0.95394	0.96126
cd00652	237.587	14968	63	173	1.57	0.95963	0.96327	0.96163	0.95817	0.9581	0.96012
cd06919	126.644	7472	59	111	1.62	0.96034	0.97436	0.96566	0.96267	0.97847	0.96975
cd00427	81.9655	14262	174	57	1.07	0.96376	0.9693	0.96508	0.9693	0.96536	0.96822
cd00473	118.686	60767	512	91	1.04	0.9641	0.96634	0.96712	0.96795	0.96331	0.96807
cd11740	163.108	82696	507	159	1.47	0.96595	0.96587	0.96604	0.96667	0.97012	0.96665
cd12935	645.586	45191	70	36	1.34	0.96821	0.9203	0.97439	0.93444	0.94205	0.96169
cd00591	100.263	5715	57	85	1.19	0.9693	0.97008	0.97008	0.97008	0.97008	0.97008
cd12208	155.775	12462	80	150	1.25	0.97056	0.96348	0.96121	0.96497	0.97062	0.96939
cd00554	231.426	26614	115	153	1.44	0.97146	0.97083	0.97081	0.97029	0.97042	0.97229
cd00472	130.014	9491	73	54	1.66	0.97207	0.96725	0.97061	0.96887	0.97269	0.96965
cd00384	330.014	24421	74	314	1.75	0.97229	0.97132	0.97196	0.97146	0.96965	0.97138
cd00528	253.074	13666	54	136	1.56	0.97341	0.95852	0.9326	0.98007	0.97928	0.95671
cd07377	284.978	118551	416	66	1.03	0.97402	0.97268	0.97635	0.97017	0.97776	0.97709
cd09294	155.133	30251	195	116	1.53	0.97497	0.97916	0.97549	0.97482	0.98024	0.97638
cd07914	218.606	31042	142	191	1.56	0.97547	0.97827	0.97467	0.97812	0.97568	0.97916
cd00003	250.547	13279	53	234	1.51	0.97617	0.97939	0.98247	0.98088	0.98019	0.9794
cd07026	125.133	13139	105	106	1.4	0.97742	0.9794	0.97793	0.97689	0.97806	0.97628
cd14263	135.455	13681	101	106	1.12	0.97865	0.9756	0.96635	0.9701	0.9689	0.96745
cd00466	149.411	13447	90	140	1.59	0.98158	0.97723	0.97668	0.9848	0.97937	0.98217
cd00569	192.107	48411	252	42	1.16	0.98389	0.97178	0.9871	0.98493	0.98599	0.98472
cd06171	256.712	18740	73	55	1.03	0.98746	0.97916	0.98482	0.97082	0.98746	0.96893
cd00355	129.557	22543	174	53	1.15	0.99527	0.99461	0.99505	0.99505	0.99505	0.99505

## Sheet: columns
cdd_id	ave_len	nres	num_sq	cols	RE	G0cols	G1cols	G2cols	G3cols	G4cols	G5cols
cd00201	740.133	99918	135	31	1.29	29	32	32	34	34	34
cd00719	270.317	16219	60	69	0.79	34	59	48	45	46	62
cd00350	164.315	11995	73	36	1.5	34	34	34	34	32	35
cd00107	70.2549	3583	51	33	1.08	37	43	36	42	44	43
cd00067	714.563	85033	119	36	1.34	46	45	52	50	53	50
cd00162	538.016	299137	556	45	1.08	48	57	51	52	47	46
cd00104	625.077	170646	273	41	1.09	49	55	59	48	48	46
cd00118	460.064	1103693	2399	45	0.95	51	47	51	52	46	51
cd11660	419.916	39892	95	50	1.41	52	51	55	52	52	52
cd00112	2333.33	1320665	566	35	1.27	54	40	25	34	56	15
cd00109	886.489	83330	94	54	1.29	54	55	56	57	55	58
cd00677	475.056	84085	177	46	1.07	54	32	64	74	68	63
cd00101	143.159	18897	132	82	0.86	54	70	46	66	56	69
cd00174	744.598	384957	517	51	1.08	54	54	56	55	52	57
cd00065	816.788	320181	392	52	1.05	55	57	58	56	54	54
cd00085	312.869	38170	122	58	0.81	56	52	58	57	55	53
cd09487	489.194	50387	103	56	0.88	57	57	58	60	61	58
cd00355	129.557	22543	174	53	1.15	58	59	57	57	57	57
cd00029	912.74	45637	50	50	1.18	59	64	61	58	73	61
cd11586	77.35	4641	60	54	0.87	59	59	58	59	59	58
cd00472	130.014	9491	73	54	1.66	59	60	61	60	62	62
cd00086	487.836	155132	318	59	1.01	60	67	66	65	72	67
cd00165	282.007	75296	267	74	0.73	63	63	56	57	61	55
cd00427	81.9655	14262	174	57	1.07	63	61	62	62	62	62
cd00633	140.945	7752	55	67	1.04	65	65	65	66	66	65
cd00167	625.602	106978	171	45	0.94	66	64	67	54	67	62
cd00048	571.574	88594	155	68	0.91	68	70	68	71	70	71
cd00371	656.217	69559	106	63	1.05	68	72	77	70	72	72
cd00083	385.74	56318	146	60	0.91	69	80	63	63	65	66
cd06257	407.604	62771	154	55	1.24	69	67	70	69	71	71
cd00093	202.231	112845	558	58	0.72	70	70	70	70	70	69
cd00207	342.393	67109	196	84	0.89	72	69	69	72	70	69
cd00291	142.021	27410	193	69	0.96	72	72	70	72	72	73
cd08168	276.728	28503	103	87	0.97	73	78	79	83	72	73
cd00196	408.288	256405	628	69	0.48	73	69	75	73	73	74
cd09212	648.326	89469	138	96	0.71	73	68	73	82	80	75
cd02325	528.98	159752	302	60	0.84	73	75	67	61	72	66
cd12870	94.8889	6832	72	66	1.02	73	74	73	74	72	73
cd00191	1411.33	121374	86	66	1.15	74	67	72	73	125	72
cd02116	462.894	752665	1626	60	0.54	74	76	70	83	75	64
cd00136	451.853	30726	68	70	0.77	74	87	76	73	72	75
cd01292	485.902	24781	51	276	0.59	75	63	42	58	77	47
cd00027	861.048	124852	145	72	0.66	75	77	83	77	87	73
cd12934	581.014	40671	70	37	1.31	75	104	88	52	88	88
cd00618	209.216	21340	102	81	0.96	76	68	84	80	82	68
cd00117	220.662	17653	80	81	1.06	77	113	86	112	99	111
cd00090	198.078	35456	179	77	0.72	78	71	77	78	76	80
cd00164	735.477	80167	109	65	0.87	79	85	88	73	79	85
cd00084	454.668	87751	193	66	0.96	79	81	80	87	84	82
cd07765	548.298	62506	114	40	1.27	79	85	76	84	79	68
cd00060	712.789	101216	142	102	0.75	80	92	85	95	94	92
cd00138	547.923	42738	78	119	0.64	81	125	117	119	123	116
cd06445	172.34	65317	379	79	1.2	81	82	78	81	81	81
cd01614	92.7286	6491	70	83	1.23	81	81	82	81	81	83
cd00111	708.44	35422	50	44	1.42	82	67	80	81	55	58
cd12144	552.69	32056	58	114	1.32	83	354	347	256	161	323
cd06916	456.136	26912	59	72	1.86	83	83	81	81	84	84
cd01037	262.6	26260	100	78	0.62	84	70	52	100	97	96
cd00130	771.413	141940	184	103	0.42	85	176	193	211	197	117
cd07323	507.581	31470	62	75	1.28	85	89	88	88	89	89
cd09725	93.3471	11295	121	79	1.19	85	87	85	87	86	87
cd10148	99.0672	13275	134	80	1.16	85	83	83	84	86	85
cd00590	475.367	223898	471	72	0.72	86	85	86	86	83	85
cd00367	297.538	35407	119	77	1.1	86	83	86	83	86	86
cd00024	1052.53	128409	122	55	0.91	88	81	84	93	61	91
cd00042	208.113	11030	53	101	1.01	88	87	89	82	84	88
cd00133	395.211	179821	455	85	0.68	88	87	87	81	87	87
cd00213	264.23	35671	135	88	1.37	88	92	88	91	88	88
cd04508	1203.99	420192	349	48	1	90	75	84	75	76	107
cd05992	547.312	84286	154	81	0.79	90	79	88	76	88	77
cd08048	234.1	11705	50	84	1.52	90	97	101	100	97	98
cd00591	100.263	5715	57	85	1.19	90	89	89	89	89	89
cd00022	475.892	30933	65	69	1.3	91	85	97	96	99	98
cd00052	844.172	48962	58	67	1.23	91	90	92	95	106	96
cd00158	255.282	79648	312	89	0.83	91	92	91	94	93	91
cd00298	224.453	257448	1147	85	0.72	91	88	89	91	93	87
cd00320	118.48	11611	98	93	1.21	91	92	93	90	90	89
cd00012	430.08	53760	125	303	0.44	92	132	139	115	76	94
cd00488	114.327	12919	113	76	1.31	92	92	92	92	90	92
cd03467	273.353	41823	153	98	0.78	94	95	96	97	95	95
cd00051	282.8	29694	105	63	0.99	95	68	73	70	67	68
cd00473	118.686	60767	512	91	1.04	95	95	95	95	95	95
cd00651	281.3	19691	70	121	0.75	96	111	108	85	98	76
cd00173	742.909	261504	352	78	0.78	99	99	99	97	95	99
cd00552	165.594	23680	143	91	1.05	99	100	99	99	99	99
cd00241	614.019	63858	104	159	0.42	100	150	73	113	81	96
cd06462	223.036	177537	796	85	0.77	101	100	97	108	103	106
cd02153	554.82	89326	161	98	1.12	102	99	101	103	103	102
cd06571	398.213	78448	197	90	1.1	102	101	105	100	103	106
cd03440	261.528	482780	1846	100	0.45	103	108	105	106	102	108
cd00105	740.726	410362	554	64	0.78	105	117	85	129	96	95
cd00185	635.912	72494	114	85	0.91	105	84	88	92	95	84
cd02409	284.825	76333	268	67	0.69	106	132	111	125	119	111
cd02440	370.214	38132	103	142	0.51	106	108	105	100	110	108
cd00010	188.343	12619	67	63	1.03	106	84	87	84	102	82
cd00562	230.58	25825	112	102	0.85	106	103	106	107	107	100
cd08026	122.163	11972	98	102	1.1	106	105	106	106	106	106
cd03493	154.792	50617	327	98	0.55	107	104	105	103	108	104
cd00336	173.158	23030	133	105	1.12	107	108	108	109	108	110
cd00014	920.37	49700	54	107	0.9	109	103	109	104	105	102
cd12927	150.827	23529	156	103	0.89	109	101	102	106	104	102
cd00432	180.706	24576	136	103	1.06	111	108	114	114	104	116
cd07026	125.133	13139	105	106	1.4	111	114	111	110	114	113
cd00580	124.491	6598	53	113	1.17	112	112	113	113	113	113
cd00030	824.784	431362	523	102	0.66	113	110	111	111	107	107
cd06587	170.075	54424	320	113	0.62	113	112	113	112	113	113
cd06661	202.281	45311	224	99	0.76	113	102	112	114	100	102
cd00392	173.677	23099	133	114	1.3	113	110	118	108	120	115
cd06664	161.903	33514	207	122	1.05	113	115	115	116	116	116
cd02407	156.456	8918	57	115	1.42	114	116	114	116	114	115
cd08368	495.588	197244	398	53	1.08	115	116	117	113	118	114
cd00037	924.444	788551	853	115	0.7	115	108	118	115	109	136
cd00161	577.2	60606	105	123	0.79	115	117	119	117	124	95
cd02883	207.35	41470	200	123	0.64	115	111	111	110	115	106
cd06093	587.464	121605	207	106	0.71	115	125	118	111	115	109
cd00069	147.736	21274	144	95	1.32	115	111	115	114	107	116
cd07557	197.642	57909	293	91	1.01	116	120	124	122	121	129
cd06919	126.644	7472	59	111	1.62	116	118	116	116	118	117
cd02205	340.76	147549	433	113	0.6	117	113	116	116	117	116
cd00156	388.727	119728	308	113	0.85	117	124	125	125	124	124
cd14263	135.455	13681	101	106	1.12	117	116	116	115	116	116
cd00531	228.344	37220	163	127	0.58	118	116	121	115	114	119
cd04369	911.724	254371	279	99	0.8	118	115	129	112	113	114
cd09030	130.822	9550	73	102	0.93	118	122	121	121	123	118
cd00119	200.412	10221	51	124	1.6	118	118	117	119	118	117
cd03587	388.083	60541	156	41	1.23	118	64	74	50	55	126
cd00513	140.161	7849	56	107	1.59	118	116	117	116	118	119
cd11380	210.309	28602	136	138	1.48	119	118	110	119	120	120
cd02065	534.04	66755	125	125	0.83	120	112	118	109	126	126
cd07440	488.931	28358	58	113	0.89	120	128	122	123	123	124
cd00448	202.237	172508	853	107	0.88	120	121	123	118	124	121
cd11709	1688.43	168843	100	117	0.85	122	114	118	121	125	119
cd00188	635.282	388157	611	83	0.57	122	108	120	114	123	127
cd00387	156.744	20220	129	125	1.15	122	122	123	122	122	122
cd09804	365.073	20079	55	121	1.35	122	131	129	130	123	128
cd00146	2157.34	153171	71	81	0.78	123	146	157	132	176	150
cd12152	146.54	48065	328	123	0.84	123	124	129	128	123	122
cd00075	646.349	312833	484	104	0.81	125	129	115	131	117	123
cd11378	215.408	16371	76	113	0.99	125	124	125	125	126	126
cd09281	196.399	37905	193	123	1.21	125	120	119	119	120	126
cd06222	484.917	40733	84	121	0.87	126	133	129	132	130	127
cd07177	251.447	90018	358	104	0.59	127	125	123	118	121	119
cd00115	168.671	12313	73	141	1.1	127	130	128	126	127	125
cd07153	147.014	54395	370	116	0.95	127	126	126	125	126	127
cd00070	297.707	27389	92	127	1.01	128	126	126	130	130	129
cd00657	219.88	29244	133	126	0.63	129	130	133	133	131	131
cd00041	1773.26	523113	295	112	0.85	130	123	117	138	130	122
cd06223	268.35	292502	1090	130	0.54	130	127	127	121	132	133
cd01433	170.468	26593	156	112	1.16	130	129	132	130	132	128
cd00756	172.124	24958	145	124	1.2	130	131	132	133	134	131
cd00121	599.261	211539	353	126	0.68	131	123	132	120	122	126
cd04301	220.602	209351	949	65	0.62	131	133	133	133	104	130
cd00538	667.534	38717	58	127	0.7	132	110	100	90	111	117
cd09693	238.976	30111	126	204	0.68	133	142	139	140	136	146
cd00588	408.17	21633	53	135	0.87	133	140	132	129	131	130
cd00349	160.616	22165	138	131	1.32	135	139	136	138	138	139
cd07066	1413.91	189464	134	118	0.94	136	126	113	111	127	128
cd07812	184.684	36198	196	141	0.47	136	139	133	139	140	135
cd00038	524.799	153766	293	115	0.65	136	122	131	118	138	130
cd07185	355.553	372264	1047	106	0.94	136	130	123	125	133	135
cd12212	153.875	8617	56	115	1.32	136	141	141	139	143	139
cd06974	349.249	61817	177	163	0.9	138	151	141	145	142	140
cd00305	183.809	12499	68	144	1.21	138	139	137	137	137	136
cd00211	377.491	41524	110	136	0.89	138	137	138	139	137	138
cd11655	696.786	48775	70	57	1.16	139	157	118	136	132	136
cd00009	655.694	87863	134	150	0.62	139	163	159	139	139	153
cd00081	898.449	70079	78	311	0.55	140	136	148	149	131	134
cd00838	352.44	52866	150	199	0.44	140	138	141	143	134	139
cd00127	358.731	18654	52	139	1.17	140	141	141	141	143	142
cd06845	231.31	20124	87	144	0.88	141	140	147	150	145	144
cd09916	164.932	12040	73	96	0.91	141	111	139	114	117	127
cd00466	149.411	13447	90	140	1.59	141	140	140	141	141	143
cd01610	317.869	199304	627	120	0.6	142	149	158	149	143	153
cd00317	284.859	26207	92	146	1.1	142	141	134	138	142	140
cd06971	173.756	29191	168	143	1.02	142	146	143	144	145	141
cd00518	173.236	34474	199	140	0.85	142	143	143	143	144	143
cd01427	260.443	91676	352	201	0.54	144	146	144	146	144	141
cd09731	187.983	11091	59	141	0.88	145	144	145	144	145	143
cd00077	450.613	111752	248	146	0.52	146	144	144	149	123	134
cd06259	249.102	111847	449	151	0.75	146	149	145	146	146	146
cd00528	253.074	13666	54	136	1.56	146	143	150	146	146	143
cd09294	155.133	30251	195	116	1.53	146	146	147	146	146	146
cd04332	307.653	152288	495	136	0.75	147	150	147	143	151	152
cd00195	314.408	22323	71	141	1.16	147	144	146	146	145	147
cd00525	506.77	101354	200	182	0.72	148	171	174	189	151	166
cd03128	377.622	652909	1729	92	0.49	148	146	150	145	147	144
cd06583	357.452	103661	290	125	0.87	148	135	137	139	136	137
cd00096	1614.13	2960322	1834	72	0.55	149	147	133	156	143	152
cd06167	322.265	86367	268	151	0.57	149	147	129	137	136	128
cd00487	184.603	28798	156	140	1.24	149	157	153	157	157	149
cd00882	344.293	51644	150	160	0.66	150	154	153	151	146	163
cd12208	155.775	12462	80	150	1.25	150	149	150	150	150	150
cd00431	213.873	43630	204	162	0.81	151	155	153	156	149	153
cd00033	812.219	233919	288	57	0.85	152	178	175	153	179	169
cd06171	256.712	18740	73	55	1.03	153	136	151	156	138	138
cd00102	1463.68	207842	142	89	0.72	154	114	175	121	134	150
cd07828	220.042	15623	71	148	1.12	154	154	151	153	154	151
cd00209	206.648	26451	128	157	1.18	154	152	154	155	154	155
cd00483	236.346	24580	104	128	1.31	155	156	156	155	155	155
cd05709	368.014	152358	414	202	0.76	156	156	158	156	158	158
cd02062	253.324	18746	74	158	0.86	156	156	155	157	155	153
cd00379	213.415	47805	224	155	0.82	157	145	159	158	160	160
cd00554	231.426	26614	115	153	1.44	157	157	157	157	157	157
cd07976	334.235	28410	85	316	0.75	158	138	130	176	138	154
cd00421	270.374	39745	147	152	1.01	158	162	160	157	160	160
cd00985	215.425	38992	181	178	0.88	159	164	159	168	160	166
cd00412	223.374	20327	91	155	1.42	159	159	159	160	157	160
cd11740	163.108	82696	507	159	1.47	159	159	159	159	160	159
cd00741	479.497	82953	173	152	0.67	161	167	154	161	178	177
cd00229	442.266	83146	188	188	0.45	161	157	164	160	165	162
cd00178	203.808	10598	52	172	1.09	161	162	158	160	163	160
cd00021	551.5	30884	56	39	1.24	162	133	185	186	134	124
cd00382	254.311	41707	164	159	1	162	175	171	173	173	177
cd00073	229.789	16315	71	89	1.4	162	143	158	155	147	151
cd12935	645.586	45191	70	36	1.34	163	137	179	174	181	151
cd04371	820.57	158370	193	81	0.83	165	102	130	134	126	122
cd00374	263.247	25535	97	195	0.96	167	170	166	168	173	174
cd00056	290.028	40894	141	154	0.86	167	175	168	172	169	169
cd00198	854.849	141905	166	161	0.54	169	136	137	168	157	167
cd00321	420.476	44150	105	159	1.19	169	168	175	171	155	182
cd11375	274.699	28294	103	173	1	170	168	171	168	167	170
cd06260	206.097	76256	370	155	0.67	172	172	171	174	168	173
cd00204	977.633	335328	343	126	0.69	173	186	179	169	136	159
cd02696	383.424	200531	523	174	1	175	177	176	175	176	176
cd01335	366.897	21280	58	204	0.51	176	46	24	84	87	116
cd01901	347.753	231951	667	163	0.63	176	170	155	179	162	136
cd00446	205.358	31009	151	136	1.13	176	175	158	174	175	156
cd00504	1048.9	76570	73	156	1.34	177	198	191	175	194	172
cd00652	237.587	14968	63	173	1.57	177	178	179	178	178	177
cd00569	192.107	48411	252	42	1.16	177	177	177	177	174	151
cd00043	409.523	134733	329	89	0.69	178	172	177	156	157	180
cd00495	200.636	89885	448	90	1.03	182	188	181	184	186	180
cd01425	266.953	45649	171	211	1.2	184	186	177	183	184	181
cd00462	198.169	30518	154	171	1.25	184	184	184	183	182	184
cd00593	644.52	127615	198	133	0.94	185	184	183	199	197	197
cd14660	369.825	35873	97	105	1.22	185	189	191	185	182	201
cd01983	353.452	333305	943	174	0.47	186	193	192	185	186	140
cd00159	799.646	144736	181	169	0.79	186	183	189	186	195	180
cd00088	836.011	73569	88	97	0.8	187	223	140	233	228	221
cd00299	266.874	36028	135	100	0.52	187	188	190	179	190	188
cd07040	332.627	141699	426	205	0.6	187	169	168	178	175	179
cd00761	394.431	114385	290	190	0.51	188	199	187	185	188	186
cd09727	221.667	11305	51	210	1.06	190	192	190	192	190	187
cd00386	273.382	46475	170	186	0.98	190	188	184	189	182	185
cd00501	217.316	12387	57	195	1.21	191	191	191	188	191	191
cd14458	383.746	24176	63	105	1.25	191	183	184	196	188	191
cd00641	345.518	38007	110	193	1.42	191	191	190	191	192	193
cd00351	338.857	23720	70	219	1.4	192	210	202	212	202	201
cd07914	218.606	31042	142	191	1.56	192	192	192	192	192	192
cd00064	1210.89	193742	160	49	0.92	193	207	229	221	181	205
cd07307	603.79	37435	62	194	0.6	193	197	158	201	172	206
cd00413	379.477	32635	86	212	0.8	194	185	183	182	183	189
cd01291	483.551	47388	98	326	0.56	196	196	229	205	200	210
cd00945	266.271	31420	118	200	0.89	198	201	196	205	201	200
cd06561	243.12	42546	175	198	0.76	198	200	201	199	199	201
cd11691	266.836	16277	61	107	0.84	199	201	198	204	204	200
cd00397	343.663	56017	163	166	0.63	199	213	199	177	205	220
cd00170	535.555	58911	110	157	0.71	199	226	215	175	183	191
cd00403	286.624	61051	213	206	0.93	199	202	202	202	201	202
cd14262	237.495	23512	99	173	0.77	200	209	207	199	209	208
cd03127	257.283	29073	113	90	0.83	201	201	193	194	191	202
cd06157	339.772	19367	57	166	0.8	201	200	203	209	207	199
cd07377	284.978	118551	416	66	1.03	202	186	79	212	79	79
cd06911	292.681	40390	138	86	1.03	203	205	211	205	203	215
cd06920	742.571	77970	105	117	0.8	204	188	178	193	171	201
cd06559	252.377	30790	122	208	1.21	204	207	203	207	204	206
cd09652	257.393	15701	61	189	0.72	205	209	208	212	218	211
cd07995	241.026	64113	266	208	0.88	205	204	204	206	204	205
cd00267	480.86	89440	186	208	0.74	210	204	209	206	199	204
cd00352	661.687	422156	638	220	0.78	211	218	207	244	223	199
cd00688	1001.95	268522	268	302	0.66	212	168	183	228	227	236
cd00326	363.299	64304	177	227	1.07	212	213	212	215	213	212
cd00087	563.983	32711	58	215	1.44	213	226	216	213	217	211
cd14438	356.654	18546	52	41	1.47	213	214	207	206	203	202
cd00190	374.011	66574	178	232	1.07	215	216	217	215	218	214
cd06225	597.078	122401	205	48	0.76	215	215	235	206	199	242
cd00338	470.167	84630	180	137	0.79	216	213	213	211	213	214
cd06261	317.798	80403	253	191	0.51	217	216	212	218	207	205
cd00143	507.239	69999	138	257	0.83	217	228	229	230	229	219
cd00134	340.381	21444	63	219	0.81	218	219	221	220	218	221
cd00383	241.794	126700	524	94	1.01	220	218	216	216	217	219
cd00322	396.184	34468	87	223	0.7	221	219	212	213	218	218
cd00296	414.361	50552	122	219	0.98	222	219	220	223	217	213
cd00475	261.873	175717	671	219	1.34	225	225	225	227	226	225
cd00205	1495.4	154026	103	177	0.77	227	186	208	202	106	202
cd06578	327.454	136221	416	240	0.67	228	228	228	229	227	226
cd08774	314.32	31432	100	225	1.29	228	227	228	229	228	228
cd00385	417.966	135839	325	243	0.56	229	219	262	244	243	248
cd12843	240.517	13950	58	106	1.08	229	231	229	229	226	228
cd11296	631.21	63121	100	338	0.53	230	236	227	235	241	227
cd00032	389.094	20622	53	244	1.27	231	246	229	234	243	246
cd00598	543.621	31530	58	325	0.75	234	245	235	244	242	246
cd01066	379.495	39088	103	208	0.7	234	229	242	248	257	241
cd10146	290.326	65033	224	69	0.98	234	227	224	230	227	233
cd00361	382.833	22970	60	221	1.57	234	232	234	236	233	242
cd00636	332.198	122249	368	148	0.5	235	229	231	230	234	231
cd00110	1992.74	227172	114	151	0.75	237	195	213	247	252	259
cd07980	321.15	25692	80	123	0.98	237	230	232	225	229	234
cd00003	250.547	13279	53	234	1.51	237	237	237	237	237	237
cd06558	336.511	234548	697	195	0.78	244	237	242	245	242	240
cd00577	281.911	22271	79	249	0.89	246	244	246	247	244	247
cd01081	323.983	18791	58	283	0.79	250	255	252	255	249	245
cd06550	331.241	26168	79	261	0.8	250	253	254	261	255	243
cd00306	686.336	188056	274	233	0.61	251	247	253	233	238	254
cd00537	380.684	30074	79	274	1.04	253	260	258	260	254	258
cd06660	333.381	383055	1149	286	0.84	254	253	254	254	255	253
cd00179	283.1	19817	70	152	1.24	256	246	251	229	258	246
cd03174	483.123	475393	984	265	0.93	257	260	258	258	261	262
cd05819	688.013	110082	160	271	0.84	260	260	258	219	250	257
cd00516	366.989	68260	186	262	0.85	262	234	253	249	264	248
cd00594	540.86	69771	129	270	0.82	263	265	256	262	264	265
cd01391	479.295	61829	129	279	0.5	265	258	244	244	242	261
cd00449	319.979	30398	95	255	0.98	265	267	265	261	261	270
cd01635	430.234	40442	94	313	0.47	267	294	288	251	268	283
cd00080	664.472	305657	460	71	0.9	267	253	250	259	254	250
cd00047	907.069	92521	102	231	1.23	269	266	255	269	256	271
cd00082	641.8	297795	464	65	0.75	272	233	234	230	232	233
cd12151	297.966	61679	207	282	0.96	272	270	270	269	271	271
cd00063	5295.95	3929593	742	93	0.62	274	284	225	221	287	299
cd14473	1150.88	356772	310	99	0.8	274	276	274	275	272	274
cd13944	405.431	131765	325	275	1.2	277	278	278	277	277	276
cd06560	357.02	17851	50	166	0.77	278	295	295	281	294	286
cd07025	324.564	66211	204	281	0.94	281	283	282	281	281	278
cd00055	2223.44	707055	318	50	1.09	286	273	278	271	300	245
cd04519	1143.03	86870	76	257	0.66	287	281	269	285	284	0
cd05466	299.712	105199	351	197	0.69	288	289	291	289	291	287
cd00347	430.445	110194	256	217	0.41	289	284	282	288	288	292
cd02257	902.932	279006	309	321	0.7	290	284	289	295	290	281
cd00200	633.549	57653	91	289	0.87	291	294	253	293	292	293
cd09634	356.183	50578	142	318	0.94	291	293	291	299	293	297
cd13777	431.09	52593	122	128	0.98	295	288	296	298	289	306
cd00640	398.342	127071	319	289	0.81	295	296	296	292	296	298
cd01594	492.191	203275	413	321	0.73	299	329	325	365	368	325
cd00212	513.056	45662	89	78	1.22	300	310	314	313	306	323
cd02439	364.342	58659	161	315	1.1	300	280	297	277	283	297
cd00160	1097.66	73543	67	180	0.88	301	283	310	316	297	316
cd05188	389.805	77961	200	275	0.75	302	301	296	300	300	301
cd01342	655.564	607708	927	83	0.62	307	334	338	312	304	301
cd08010	359.597	24093	67	246	1.21	312	294	321	306	292	318
cd13778	455.21	56446	124	155	0.84	313	309	310	319	316	314
cd01392	339.942	459602	1352	52	1.12	316	320	315	316	317	318
cd00384	330.014	24421	74	314	1.75	318	319	320	318	318	318
cd06071	2133.4	149338	70	277	1.37	332	275	355	335	329	307
cd10719	394.607	147583	374	65	1.25	332	333	337	329	333	331
cd00329	733.902	216501	295	106	0.78	339	307	352	387	286	308
cd00551	710.299	139929	197	363	0.56	340	318	345	333	342	307
cd07304	375.771	54111	144	344	1.39	340	343	348	340	345	342
cd06567	582.608	286643	492	334	0.66	341	327	333	324	334	330
cd00046	979.428	224289	229	146	0.74	341	351	355	359	333	338
cd10747	395.8	172569	436	222	1.08	342	344	332	332	334	332
cd00079	784.008	102705	131	131	0.83	344	346	346	343	343	352
cd00172	424.793	39081	92	364	0.96	356	357	352	359	359	358
cd08768	472.77	28839	61	87	0.98	360	357	366	363	356	362
cd06224	1098.91	98902	90	122	0.75	361	358	356	360	355	341
cd00140	378.741	42419	112	365	0.98	361	361	362	361	361	362
cd11308	822.733	61705	75	76	1.38	372	371	372	377	376	375
cd00567	449.371	31456	70	370	0.87	372	372	372	368	370	368
cd10147	431.874	140791	326	145	0.63	382	387	247	383	371	384
cd11572	396.008	94250	238	99	1.09	383	383	389	388	389	388
cd06174	474.433	209225	441	390	0.4	384	377	374	376	373	376
cd14251	654.87	45186	69	370	1.21	384	380	377	373	375	382
cd00316	500.708	77109	154	403	0.86	400	404	395	402	401	394
cd00400	564.212	63756	113	385	0.84	400	398	396	411	396	394
cd04100	562.567	118139	210	87	1.04	401	407	408	407	405	403
cd06572	449.423	87188	194	390	1.35	409	409	409	417	402	409
cd12082	478.623	25367	53	422	0.68	417	415	412	419	419	402
cd00187	982.224	56969	58	444	1.47	424	471	434	431	458	461
cd06534	513.397	34911	68	427	1.02	428	440	444	440	442	442
cd10316	632.903	39240	62	92	1.18	446	465	455	464	425	480
cd00433	504.699	98921	196	469	1.05	449	435	438	433	432	433
cd01514	718.906	259525	361	79	1.04	456	448	457	460	459	452
cd03333	650.946	217416	334	251	0.95	458	462	461	457	461	474
cd12148	768.811	1667552	2169	409	0.38	461	461	459	453	454	449
cd11377	748.2	52374	70	138	0.91	471	472	474	467	466	476
cd08044	713.5	48518	68	133	1.05	487	466	452	463	485	478
cd00995	555.994	197378	355	464	0.72	493	493	493	487	488	487
cd00568	574.053	76349	133	168	0.88	496	485	502	506	496	488
cd00181	510.295	31128	61	128	0.73	506	507	493	507	498	493
cd14745	737.333	37604	51	329	1.31	517	510	519	510	511	517
cd00368	814.607	285927	351	475	0.7	521	530	528	526	528	534
cd00253	1173.42	89180	76	185	0.8	524	466	482	479	466	492
cd00186	848.635	53464	63	417	1.07	534	525	519	521	520	522
cd13394	660.37	35660	54	618	0.94	536	542	529	549	552	543
cd00015	681.183	40871	60	185	1.07	541	573	536	549	546	546
cd12962	1525.84	105283	69	95	1.37	547	515	495	554	490	494
cd00222	1695.94	206905	122	92	1.09	564	477	435	420	463	484
cd14752	861.653	506652	588	203	0.53	566	581	577	598	595	546
cd02775	828.659	323177	390	101	0.74	577	585	575	574	587	582
cd10315	1286.16	138905	108	100	0.96	621	707	679	676	694	679
cd09233	1730.88	96929	56	356	1.04	722	700	695	713	748	755
cd13433	1560.33	113904	73	54	1.52	856	850	606	838	849	850
cd00653	1227.25	138679	113	1088	1.09	877	888	883	875	889	877
